# Supplementary material for: Intron retention resolves microgravity and non-gravitationalstress programs across immune organs in spaceflight
Source: Research Square preprint supplement (doi:10.21203/rs.3.rs-8535943/v1), 2026-01-14
Supplement: Supplementary file 1 [file 7b1270bfdd8d89c68b6e38df.xlsx]

## Sheet: Index
Supplementary Table index
Supplementary Table 1. Dataset for transcriptome studies using spaceflight mice and mechanically stressed human skin cells
Supplementary Table 2. List of differentially expressed genes between GC and MG in the thymus of RIKEN data
Supplementary Table 3. List of differentially expressed genes between GC and MG in the spleen of RIKEN data
Supplementary Table 4. List of differentially expressed genes between GC and MG in the lymph node of RIKEN data
Supplementary Table 5. List of differentially intron retention loci between GC and MG in the thymus of RIKEN data
Supplementary Table 6. List of differentially intron retention loci between GC and MG in the spleen of RIKEN data
Supplementary Table 7. List of differentially intron retention loci between GC and MG in the lymph node of RIKEN data
Supplementary Table 8. List of genes whose expression were recovered by artificial gravity in RIKEN data
Supplementary Table 9. List of genes whose IR were recovered by artificial gravity in RIKEN data
Supplementary Table 10. List of 66 genes with recovered IR in three organs from RIKEN data (using Figure 3B)
Supplementary Table 11. List of mouse orthologs of intron retention genes in mechanical stress in human epidermal stem/progenitor cells. (Nava MM, et al. Cell. 2020)
Supplementary Table 12. List of mechanosensing-related genes (Including duplicate genes)
Supplementary Table 13. List of 49 genes with non-gravitational genes in three organs from RIKEN data (using Figure 4C)	Supplementary Table 13. List of genes with non-gravitational genes in three organs from RIKEN data (using Figure 5D)	Supplementary Table 13. List of genes with non-gravitational genes in three organs from RIKEN data (using Figure 5D)	Supplementary Table 13. List of genes with non-gravitational genes in three organs from RIKEN data (using Figure 5D)	Supplementary Table 13. List of genes with non-gravitational genes in three organs from RIKEN data (using Figure 5D)	Supplementary Table 13. List of genes with non-gravitational genes in three organs from RIKEN data (using Figure 5D)	Supplementary Table 13. List of genes with non-gravitational genes in three organs from RIKEN data (using Figure 5D)	Supplementary Table 13. List of genes with non-gravitational genes in three organs from RIKEN data (using Figure 5D)	Supplementary Table 13. List of genes with non-gravitational genes in three organs from RIKEN data (using Figure 5D)	Supplementary Table 13. List of genes with non-gravitational genes in three organs from RIKEN data (using Figure 5D)	Supplementary Table 13. List of genes with non-gravitational genes in three organs from RIKEN data (using Figure 5D)	Supplementary Table 13. List of genes with non-gravitational genes in three organs from RIKEN data (using Figure 5D)	Supplementary Table 13. List of genes with non-gravitational genes in three organs from RIKEN data (using Figure 5D)	Supplementary Table 13. List of genes with non-gravitational genes in three organs from RIKEN data (using Figure 5D)	Supplementary Table 13. List of genes with non-gravitational genes in three organs from RIKEN data (using Figure 5D)	Supplementary Table 13. List of genes with non-gravitational genes in three organs from RIKEN data (using Figure 5D)	Supplementary Table 13. List of genes with non-gravitational genes in three organs from RIKEN data (using Figure 5D)	Supplementary Table 13. List of genes with non-gravitational genes in three organs from RIKEN data (using Figure 5D)	Supplementary Table 13. List of genes with non-gravitational genes in three organs from RIKEN data (using Figure 5D)	Supplementary Table 13. List of genes with non-gravitational genes in three organs from RIKEN data (using Figure 5D)	Supplementary Table 13. List of genes with non-gravitational genes in three organs from RIKEN data (using Figure 5D)	Supplementary Table 13. List of genes with non-gravitational genes in three organs from RIKEN data (using Figure 5D)	Supplementary Table 13. List of genes with non-gravitational genes in three organs from RIKEN data (using Figure 5D)	Supplementary Table 13. List of genes with non-gravitational genes in three organs from RIKEN data (using Figure 5D)	Supplementary Table 13. List of genes with non-gravitational genes in three organs from RIKEN data (using Figure 5D)	Supplementary Table 13. List of genes with non-gravitational genes in three organs from RIKEN data (using Figure 5D)	Supplementary Table 13. List of genes with non-gravitational genes in three organs from RIKEN data (using Figure 5D)	Supplementary Table 13. List of genes with non-gravitational genes in three organs from RIKEN data (using Figure 5D)	Supplementary Table 13. List of genes with non-gravitational genes in three organs from RIKEN data (using Figure 5D)	Supplementary Table 13. List of genes with non-gravitational genes in three organs from RIKEN data (using Figure 5D)	Supplementary Table 13. List of genes with non-gravitational genes in three organs from RIKEN data (using Figure 5D)	Supplementary Table 13. List of genes with non-gravitational genes in three organs from RIKEN data (using Figure 5D)	Supplementary Table 13. List of genes with non-gravitational genes in three organs from RIKEN data (using Figure 5D)	Supplementary Table 13. List of genes with non-gravitational genes in three organs from RIKEN data (using Figure 5D)	Supplementary Table 13. List of genes with non-gravitational genes in three organs from RIKEN data (using Figure 5D)	Supplementary Table 13. List of genes with non-gravitational genes in three organs from RIKEN data (using Figure 5D)	Supplementary Table 13. List of genes with non-gravitational genes in three organs from RIKEN data (using Figure 5D)	Supplementary Table 13. List of genes with non-gravitational genes in three organs from RIKEN data (using Figure 5D)	Supplementary Table 13. List of genes with non-gravitational genes in three organs from RIKEN data (using Figure 5D)	Supplementary Table 13. List of genes with non-gravitational genes in three organs from RIKEN data (using Figure 5D)	Supplementary Table 13. List of genes with non-gravitational genes in three organs from RIKEN data (using Figure 5D)	Supplementary Table 13. List of genes with non-gravitational genes in three organs from RIKEN data (using Figure 5D)	Supplementary Table 13. List of genes with non-gravitational genes in three organs from RIKEN data (using Figure 5D)	Supplementary Table 13. List of genes with non-gravitational genes in three organs from RIKEN data (using Figure 5D)	Supplementary Table 13. List of genes with non-gravitational genes in three organs from RIKEN data (using Figure 5D)	Supplementary Table 13. List of genes with non-gravitational genes in three organs from RIKEN data (using Figure 5D)	Supplementary Table 13. List of genes with non-gravitational genes in three organs from RIKEN data (using Figure 5D)	Supplementary Table 13. List of genes with non-gravitational genes in three organs from RIKEN data (using Figure 5D)	Supplementary Table 13. List of genes with non-gravitational genes in three organs from RIKEN data (using Figure 5D)	Supplementary Table 13. List of genes with non-gravitational genes in three organs from RIKEN data (using Figure 5D)
Supplementary Table 14. List of 507 radiation-related genes
[truncated: 5,000 more columns]

## Sheet: S1
Supplementary Table 1. Dataset for transcriptome studies using spaceflight mice and mechanically stressed human skin cells
organization	tissue	dataset	SE/PE	readLength	numReads	MHU	numSamples	ref
RIKEN	spleen	BioProject number: PRJDB8770	PE	36	21.6 - 30.0 M	MHU1	GC:3, MG:3, AG:3	Horie K et al. Sci Rep. 2019 May 21;9(1):7654.
RIKEN	lymph nodes	BioProject number: PRJDB8077	PE	36	24.7 - 30.4 M	MHU1	GC:3, MG:3, AG:3	Horie K et al. Sci Rep. 2019 May 21;9(1):7654.
RIKEN	thymus	BioProject number: PRJDB7956	PE	36	20.0 - 24.9 M	MHU2	GC:3, MG:3, AG:3	Horie K et al. Sci Rep. 2019 Dec 27;9(1):19866.
University of Helsinki	Human skin (epidermal stem/progenitor cells)	NCBI GEO number: GSE143519	PE	99	36.8 - 47.6 M	-	0%:3, 40%-30min:3, 40%-360min:3	Nava MM et al, Cell 2020 May 14;181(4):800-817.e22

## Sheet: S2
Supplementary Table 2. List of differentially expressed genes between GC and MG in the thymus of RIKEN IMS data
ensembl id	symbol	logFC	PValue	FDR	DEG
ENSMUSG00000000127	Fer	1.04904	1.49e-08	7.7e-07	Up
ENSMUSG00000000184	Ccnd2	0.471468	0.00454669	0.0415693	Up
ENSMUSG00000000197	Nalcn	1.69544	0.00311917	0.0315597	Up
ENSMUSG00000000216	Scnn1g	1.33982	0.000519645	0.00737998	Up
ENSMUSG00000000244	Tspan32	0.319376	0.00118512	0.0145079	Up
ENSMUSG00000000248	Clec2g	0.956602	0.0010947	0.01357	Up
ENSMUSG00000000266	Mid2	0.85433	3.91e-05	0.000848906	Up
ENSMUSG00000000290	Itgb2	0.319147	0.000731826	0.00982027	Up
ENSMUSG00000000303	Cdh1	0.581755	0.00182005	0.0205848	Up
ENSMUSG00000000305	Cdh4	0.46803	3.18e-06	9.71e-05	Up
ENSMUSG00000000318	Clec10a	1.23903	0.000231139	0.00377767	Up
ENSMUSG00000000385	Tmprss2	1.30028	1.66e-07	6.84e-06	Up
ENSMUSG00000000386	Mx1	1.32879	7.6e-05	0.00149512	Up
ENSMUSG00000000567	Sox9	0.766255	2.58e-08	1.27e-06	Up
ENSMUSG00000000594	Gm2a	0.591181	3.68e-07	1.42e-05	Up
ENSMUSG00000000600	Krit1	0.293921	0.000818921	0.0108086	Up
ENSMUSG00000000682	Cd52	0.57378	1.19e-08	6.26e-07	Up
ENSMUSG00000000766	Oprm1	0.854139	0.000138621	0.00248199	Up
ENSMUSG00000000794	Kcnn3	0.779273	0.000102635	0.00193245	Up
ENSMUSG00000000804	Usp32	0.363442	0.000832851	0.010952	Up
ENSMUSG00000000805	Car4	1.41898	8.17e-05	0.00159088	Up
ENSMUSG00000000817	Fasl	1.0831	9.92e-05	0.00188114	Up
ENSMUSG00000000861	Bcl11a	1.02657	3.89e-09	2.21e-07	Up
ENSMUSG00000000958	Slc7a7	0.508417	0.00281371	0.0291005	Up
ENSMUSG00000000983	Wfdc18	0.607325	0.00272868	0.0284335	Up
ENSMUSG00000001018	Snapin	0.47491	0.0032139	0.032312	Up
ENSMUSG00000001036	Epn2	0.57705	0.000592351	0.0082149	Up
ENSMUSG00000001089	Luzp1	0.29709	0.00278108	0.0288437	Up
ENSMUSG00000001128	Cfp	0.803281	5.7e-06	0.00016115	Up
ENSMUSG00000001166	Oas1c	0.944826	0.00301507	0.0307193	Up
ENSMUSG00000001173	Ocrl	0.529018	0.000384863	0.00579824	Up
ENSMUSG00000001497	Pax9	0.823121	1.31e-09	8.09e-08	Up
ENSMUSG00000001521	Tulp3	0.41562	0.000375172	0.00567999	Up
ENSMUSG00000001542	Ell2	0.948154	2.12e-10	1.5e-08	Up
ENSMUSG00000001663	Gstt1	0.821427	0.00330957	0.0331118	Up
ENSMUSG00000001700	Gramd3	0.554079	2.34e-06	7.39e-05	Up
ENSMUSG00000001768	Rin2	0.80787	5.55e-08	2.55e-06	Up
ENSMUSG00000001865	Cpa3	0.959391	0.000128236	0.00233056	Up
ENSMUSG00000002058	Unc119	0.539521	0.00166822	0.0193407	Up
ENSMUSG00000002059	Rab34	0.704557	0.00274345	0.0285441	Up
ENSMUSG00000002111	Spi1	0.691981	0.00378332	0.0368484	Up
ENSMUSG00000002265	Peg3	1.31526	8.58e-15	1.08e-12	Up
ENSMUSG00000002325	Irf9	1.25346	2.12e-05	0.000502488	Up
ENSMUSG00000002365	Snx9	0.788311	2.06e-09	1.22e-07	Up
ENSMUSG00000002475	Abhd3	1.30424	0.00168448	0.0194925	Up
ENSMUSG00000002602	Axl	0.83162	4.71e-12	4.28e-10	Up
ENSMUSG00000002733	Plekha3	0.340623	0.00492251	0.0442253	Up
ENSMUSG00000002797	Ggct	0.639729	0.00216391	0.0235291	Up
ENSMUSG00000002900	Lamb1	0.591317	2.92e-10	2.01e-08	Up
ENSMUSG00000002985	Apoe	0.784638	2.46e-09	1.43e-07	Up
ENSMUSG00000002996	Hbp1	0.381579	0.000844207	0.0110713	Up
ENSMUSG00000003051	Elf3	1.31438	1.72e-07	7.09e-06	Up
ENSMUSG00000003228	Grk5	0.414859	0.000331903	0.00511707	Up
ENSMUSG00000003282	Plag1	1.00112	1.68e-10	1.22e-08	Up
ENSMUSG00000003283	Hck	0.592679	0.000746392	0.00998916	Up
ENSMUSG00000003379	Cd79a	0.521909	0.00316554	0.0319281	Up
ENSMUSG00000003418	St8sia6	1.25882	4.87e-11	3.87e-09	Up
ENSMUSG00000003420	Fcgrt	0.62772	0.000232912	0.00379993	Up
ENSMUSG00000003452	Bicd1	0.950921	4.55e-09	2.56e-07	Up
ENSMUSG00000003484	Cyp4f18	0.853851	0.000166281	0.00289321	Up
ENSMUSG00000003617	Cp	0.862466	3.74e-07	1.44e-05	Up
ENSMUSG00000003847	Nfat5	0.47373	5.17e-07	1.93e-05	Up
ENSMUSG00000003882	Il7r	0.881347	3.07e-13	3.24e-11	Up
ENSMUSG00000004085	Map3k20	0.313572	0.000536913	0.00759217	Up
ENSMUSG00000004151	Etv1	0.79439	0.00171952	0.0198277	Up
ENSMUSG00000004328	Hif3a	1.12653	5.94e-07	2.18e-05	Up
ENSMUSG00000004347	Pde1c	0.91353	1.75e-05	0.000428245	Up
ENSMUSG00000004359	Spic	1.07507	3.11e-07	1.22e-05	Up
ENSMUSG00000004508	Gab2	0.70798	1.48e-06	4.97e-05	Up
ENSMUSG00000004552	Ctse	0.344443	0.00318562	0.0320857	Up
ENSMUSG00000004609	Cd33	0.683181	0.000139996	0.00250256	Up
ENSMUSG00000004633	Chn2	0.77945	4.52e-05	0.000961452	Up
ENSMUSG00000004668	Abca13	0.827835	0.00273404	0.0284783	Up
ENSMUSG00000004698	Hdac9	0.514616	0.00556425	0.0487509	Up
ENSMUSG00000004707	Ly9	0.59993	2.52e-11	2.08e-09	Up
ENSMUSG00000004730	Adgre1	0.640334	4.06e-06	0.000120597	Up
ENSMUSG00000005087	Cd44	0.608699	6.97e-05	0.00138709	Up
ENSMUSG00000005225	Plekha8	0.789243	0.000525149	0.00745051	Up
ENSMUSG00000005267	Zfp287	0.766017	4.43e-05	0.000945977	Up
ENSMUSG00000005338	Cadm3	1.22792	4.96e-05	0.00103838	Up
ENSMUSG00000005360	Slc1a3	0.648062	1.93e-05	0.000463589	Up
ENSMUSG00000005371	Fbxo11	0.325555	0.000623212	0.0085658	Up
ENSMUSG00000005413	Hmox1	0.784825	4.6e-08	2.15e-06	Up
ENSMUSG00000005547	Cyp2a5	1.02332	0.000407772	0.00607573	Up
ENSMUSG00000005583	Mef2c	0.751278	0.000574866	0.0080185	Up
ENSMUSG00000005871	Apc	0.402698	1.66e-05	0.000410579	Up
ENSMUSG00000005883	Spo11	0.271642	0.00294054	0.0300936	Up
ENSMUSG00000006205	Htra1	0.660813	4.42e-06	0.000129487	Up
ENSMUSG00000006356	Crip2	0.463184	0.00554343	0.0486075	Up
ENSMUSG00000006386	Tek	0.730832	0.000835095	0.0109751	Up
ENSMUSG00000006611	Hfe	0.824589	1.55e-07	6.4e-06	Up
ENSMUSG00000006699	Cdc42	0.376064	0.000207706	0.00346616	Up
ENSMUSG00000006930	Hap1	0.730248	0.00460781	0.0419687	Up
ENSMUSG00000007891	Ctsd	0.290695	0.000514497	0.00731809	Up
ENSMUSG00000007989	Fzd3	0.725455	0.000929955	0.0119197	Up
ENSMUSG00000008206	Cers4	0.78002	0.000448389	0.00654902	Up
ENSMUSG00000008398	Elk3	0.379646	4.24e-09	2.39e-07	Up
ENSMUSG00000008540	Mgst1	0.635858	0.00437971	0.0407336	Up
ENSMUSG00000008575	Nfib	0.74661	3.15e-06	9.62e-05	Up
ENSMUSG00000008845	Cd163	0.639789	0.00172543	0.0198711	Up
ENSMUSG00000009291	Pttg1ip	0.288571	0.000729636	0.00979326	Up
ENSMUSG00000009292	Trpm2	0.638491	0.001293	0.0156238	Up
ENSMUSG00000009376	Met	0.792619	0.000164806	0.00287656	Up
ENSMUSG00000009378	Slc16a12	1.08179	0.00493511	0.0442785	Up
ENSMUSG00000009418	Nav1	0.59954	0.000159095	0.00279269	Up
ENSMUSG00000009569	Mkl2	0.449869	8.57e-10	5.44e-08	Up
ENSMUSG00000010122	Slc47a1	1.20434	0.000461226	0.00670125	Up
ENSMUSG00000010136	Pifo	1.47653	0.000295117	0.00461366	Up
ENSMUSG00000010461	Eya4	0.990193	2.99e-11	2.43e-09	Up
ENSMUSG00000011256	Adam19	0.490886	0.00135572	0.0162579	Up
ENSMUSG00000011831	Evi5	0.49183	0.00188104	0.0210472	Up
ENSMUSG00000012350	Ehf	1.01524	1.44e-05	0.000360924	Up
ENSMUSG00000012428	Steap4	0.662558	5.82e-05	0.00119033	Up
ENSMUSG00000012640	Zfp715	0.462026	2.28e-05	0.000534099	Up
ENSMUSG00000013076	Amotl1	0.727248	7.31e-08	3.26e-06	Up
ENSMUSG00000013089	Etv5	0.576037	0.000889745	0.0114973	Up
ENSMUSG00000013643	Lypd8	1.12167	1.7e-05	0.000417197	Up
ENSMUSG00000014030	Pax5	1.08274	0.0012447	0.0151126	Up
ENSMUSG00000014329	Bicc1	0.676135	0.00381798	0.0369489	Up
ENSMUSG00000014361	Mertk	1.07356	1.5e-11	1.27e-09	Up
ENSMUSG00000014547	Wdfy2	0.321751	0.00024098	0.0039143	Up
ENSMUSG00000014592	Camta1	0.431967	0.000293738	0.00459635	Up
ENSMUSG00000014599	Csf1	0.499404	0.00164199	0.0190884	Up
ENSMUSG00000014725	Adam28	1.55065	3.58e-18	6.05e-16	Up
ENSMUSG00000014763	Fam120b	0.292991	0.00255486	0.0269611	Up
ENSMUSG00000014773	Dll1	0.563092	0.00232822	0.024949	Up
ENSMUSG00000014846	Tppp3	0.806091	0.000768723	0.0102411	Up
ENSMUSG00000014905	Dnajb9	0.893183	9.75e-10	6.11e-08	Up
ENSMUSG00000014932	Yes1	1.08209	5.6e-09	3.11e-07	Up
ENSMUSG00000015133	Lrrk1	0.428939	0.00511239	0.0455039	Up
ENSMUSG00000015214	Mtmr1	0.327124	0.00271842	0.0283528	Up
ENSMUSG00000015222	Map2	1.02638	1.6e-07	6.58e-06	Up
ENSMUSG00000015224	Cyp2j9	0.97907	0.000248026	0.00400392	Up
ENSMUSG00000015243	Abca1	1.0844	4.81e-23	1.15e-20	Up
ENSMUSG00000015305	Sash1	0.608071	6.83e-07	2.47e-05	Up
ENSMUSG00000015316	Slamf1	0.406305	0.00369959	0.0361917	Up
ENSMUSG00000015340	Cybb	1.02184	7.03e-08	3.16e-06	Up
ENSMUSG00000015355	Cd48	0.613736	0.00026165	0.00418377	Up
ENSMUSG00000015437	Gzmb	1.74157	0.000404578	0.0060395	Up
ENSMUSG00000015501	Hivep2	0.289615	0.000570495	0.00796955	Up
ENSMUSG00000015568	Lpl	0.537423	5.16e-06	0.000148127	Up
ENSMUSG00000015597	Zfp318	0.361333	0.000990457	0.0125502	Up
ENSMUSG00000015599	Ttbk1	1.26087	0.00050929	0.00726342	Up
ENSMUSG00000015839	Nfe2l2	0.423812	1.68e-05	0.000413102	Up
ENSMUSG00000015846	Rxra	0.417856	0.0017246	0.0198657	Up
ENSMUSG00000015854	Cd5l	1.41588	3.04e-05	0.000683896	Up
ENSMUSG00000015932	Dstn	0.919178	9.37e-15	1.17e-12	Up
ENSMUSG00000015947	Fcgr1	1.76497	1.72e-06	5.65e-05	Up
ENSMUSG00000015950	Ncf1	0.658335	0.000741084	0.00992816	Up
ENSMUSG00000015966	Il17rb	0.267947	0.00153868	0.0180883	Up
ENSMUSG00000016128	Stard13	0.694741	0.00534972	0.0471848	Up
ENSMUSG00000016194	Hsd11b1	0.750208	1.17e-10	8.73e-09	Up
ENSMUSG00000016356	Col20a1	0.595692	0.00101033	0.0127632	Up
ENSMUSG00000016382	Pls3	0.549301	0.00432621	0.0403646	Up
ENSMUSG00000016534	Lamp2	0.575542	6.82e-06	0.000187927	Up
ENSMUSG00000016918	Sulf1	0.737133	1.16e-06	3.99e-05	Up
ENSMUSG00000017009	Sdc4	0.470746	0.000861596	0.0112277	Up
ENSMUSG00000017057	Il13ra1	0.703914	3.63e-05	0.000793766	Up
ENSMUSG00000017291	Taok1	0.328717	0.00084607	0.0110904	Up
ENSMUSG00000017309	Cd300lg	1.14857	6.43e-05	0.0012958	Up
ENSMUSG00000017314	Mpp2	0.77876	0.00185051	0.020815	Up
ENSMUSG00000017607	Tns4	0.929309	2.24e-06	7.11e-05	Up
ENSMUSG00000017667	Zfp334	0.873476	0.00022947	0.00375926	Up
ENSMUSG00000017754	Pltp	0.354142	0.00432268	0.0403533	Up
ENSMUSG00000017760	Ctsa	0.32394	0.000248358	0.00400601	Up
ENSMUSG00000017830	Dhx58	1.03228	9.47e-05	0.00180693	Up
ENSMUSG00000018008	Cyth4	0.424412	0.00574562	0.0499776	Up
ENSMUSG00000018042	Cyb5r3	0.371706	0.000114934	0.00213289	Up
ENSMUSG00000018199	Trove2	0.511991	3.37e-06	0.000102233	Up
ENSMUSG00000018217	Pmp22	0.955935	6.45e-07	2.35e-05	Up
ENSMUSG00000018417	Myo1b	0.815762	3.63e-14	4.27e-12	Up
ENSMUSG00000018567	Gabarap	0.430232	6.02e-08	2.74e-06	Up
ENSMUSG00000018623	Mmp7	1.62642	8.93e-05	0.00171348	Up
ENSMUSG00000018750	Zbtb4	0.395408	4.26e-05	0.000913343	Up
ENSMUSG00000018774	Cd68	0.693834	3.11e-06	9.51e-05	Up
ENSMUSG00000018800	Abca5	1.13364	4.29e-07	1.63e-05	Up
ENSMUSG00000018920	Cxcl16	0.595146	1.38e-05	0.000348272	Up
ENSMUSG00000018924	Alox15	0.860961	0.00474232	0.0429822	Up
ENSMUSG00000018927	Ccl6	1.51243	3.68e-15	4.78e-13	Up
ENSMUSG00000019122	Ccl9	1.72959	1.56e-10	1.14e-08	Up
ENSMUSG00000019256	Ahr	0.621547	0.00110383	0.0136593	Up
ENSMUSG00000019528	Gyg	0.495485	0.00024177	0.0039191	Up
ENSMUSG00000019647	Sema6a	1.00839	0.000150906	0.00267329	Up
ENSMUSG00000019699	Akt3	0.30696	0.00304102	0.0309383	Up
ENSMUSG00000019779	Frk	0.946106	0.000253073	0.00406669	Up
ENSMUSG00000019789	Hey2	1.28157	2.89e-06	8.92e-05	Up
ENSMUSG00000019806	Aig1	0.690947	1.67e-05	0.000412194	Up
ENSMUSG00000019841	Rev3l	0.410047	0.000171366	0.00296309	Up
ENSMUSG00000019851	Perp	0.466722	7.34e-05	0.0014508	Up
ENSMUSG00000019852	Arfgef3	0.890691	1.58e-09	9.6e-08	Up
ENSMUSG00000019866	Crybg1	0.424759	0.00391247	0.0372817	Up
ENSMUSG00000019872	Smpdl3a	1.02924	4.66e-16	6.59e-14	Up
ENSMUSG00000019873	Reep3	0.335111	0.000619992	0.00852788	Up
ENSMUSG00000019876	Pkib	0.894742	0.00446015	0.0409804	Up
ENSMUSG00000019889	Ptprk	0.594394	7.45e-07	2.67e-05	Up
ENSMUSG00000019899	Lama2	0.718848	1.61e-06	5.35e-05	Up
ENSMUSG00000019929	Dcn	0.972562	1.75e-16	2.56e-14	Up
ENSMUSG00000019944	Rhobtb1	0.745493	0.00355979	0.0351237	Up
ENSMUSG00000019947	Arid5b	0.829478	5.42e-13	5.56e-11	Up
ENSMUSG00000019951	Uhrf1bp1l	0.266034	0.00210982	0.0231267	Up
ENSMUSG00000019960	Dusp6	0.452711	0.00141307	0.0168508	Up
ENSMUSG00000019966	Kitl	0.736421	7.34e-09	4e-07	Up
ENSMUSG00000019970	Sgk1	0.751422	1.28e-07	5.41e-06	Up
ENSMUSG00000019990	Pde7b	1.91307	3.92e-15	5.05e-13	Up
ENSMUSG00000019998	Stx7	0.335143	0.00047298	0.00684692	Up
ENSMUSG00000020010	Vnn3	1.29919	0.00347569	0.0344939	Up
ENSMUSG00000020021	Fgd6	0.462616	0.00568692	0.0495291	Up
ENSMUSG00000020032	Nuak1	0.57424	0.000443962	0.00649806	Up
ENSMUSG00000020044	Timp3	0.671733	0.0016045	0.0187271	Up
ENSMUSG00000020053	Igf1	0.946837	1.12e-14	1.39e-12	Up
ENSMUSG00000020062	Slc5a8	1.15556	0.00153673	0.0180731	Up
ENSMUSG00000020070	Rufy2	0.343418	3.18e-05	0.000710367	Up
ENSMUSG00000020077	Srgn	0.64476	1.57e-06	5.22e-05	Up
ENSMUSG00000020097	Sgpl1	0.383166	0.00182536	0.0206029	Up
ENSMUSG00000020100	Slc29a3	0.275727	0.00103539	0.0130127	Up
ENSMUSG00000020102	Slc16a7	0.960811	5.15e-09	2.88e-07	Up
ENSMUSG00000020105	Lrig3	1.15755	0.000200707	0.00337937	Up
ENSMUSG00000020120	Plek	0.842038	1.77e-05	0.000431584	Up
ENSMUSG00000020121	Srgap1	0.979269	2.77e-07	1.09e-05	Up
ENSMUSG00000020122	Egfr	1.0294	1.38e-13	1.52e-11	Up
ENSMUSG00000020142	Slc1a4	0.58351	0.000888514	0.0114894	Up
ENSMUSG00000020154	Ptprb	0.549415	0.000468826	0.00679743	Up
ENSMUSG00000020160	Meis1	1.03381	8.18e-14	9.23e-12	Up
ENSMUSG00000020173	Cobl	0.520993	0.00169571	0.0195939	Up
ENSMUSG00000020176	Grb10	0.83466	0.000389936	0.00585717	Up
ENSMUSG00000020227	Irak3	1.20604	5.92e-08	2.7e-06	Up
ENSMUSG00000020263	Appl2	0.499293	5e-06	0.000143827	Up
ENSMUSG00000020273	Papolg	0.40328	6.14e-05	0.00124965	Up
ENSMUSG00000020275	Rel	0.580323	5.1e-06	0.000146522	Up
ENSMUSG00000020300	Cpeb4	0.412782	6.62e-06	0.000182994	Up
ENSMUSG00000020326	Ccng1	0.487589	2.58e-07	1.03e-05	Up
ENSMUSG00000020363	Gfpt2	0.841628	5.87e-05	0.0011998	Up
ENSMUSG00000020383	Il13	0.829121	0.00393187	0.0374409	Up
ENSMUSG00000020389	Cdkl3	0.565645	0.00315686	0.0318655	Up
ENSMUSG00000020399	Havcr2	0.717936	0.000560119	0.00785227	Up
ENSMUSG00000020407	Upp1	1.33759	0.000558282	0.00783643	Up
ENSMUSG00000020422	Tns3	1.16221	2.84e-28	1.05e-25	Up
ENSMUSG00000020432	Tcn2	0.876535	1.61e-06	5.35e-05	Up
ENSMUSG00000020463	Ppp4r3b	0.327422	0.000606946	0.00837543	Up
ENSMUSG00000020474	Polm	0.610692	6.68e-06	0.00018427	Up
ENSMUSG00000020541	Tom1l1	0.501725	0.00165717	0.0192246	Up
ENSMUSG00000020546	Stxbp4	0.409747	4.38e-05	0.000935205	Up
ENSMUSG00000020572	Nampt	0.641779	0.000445645	0.00651066	Up
ENSMUSG00000020589	Fam49a	0.68995	9.56e-08	4.17e-06	Up
ENSMUSG00000020598	Nrcam	1.29178	0.000305603	0.00475519	Up
ENSMUSG00000020600	Slc7a15	1.39404	0.00243854	0.0259259	Up
ENSMUSG00000020609	Apob	1.3019	3.82e-06	0.000113908	Up
ENSMUSG00000020627	Klhl29	0.628269	0.000779893	0.0103672	Up
ENSMUSG00000020640	Itsn2	0.273542	0.00262853	0.0275916	Up
ENSMUSG00000020641	Rsad2	2.03144	1.73e-06	5.67e-05	Up
ENSMUSG00000020644	Id2	0.651977	1.9e-05	0.000457367	Up
ENSMUSG00000020647	Ncoa1	0.349628	0.00455051	0.0415834	Up
ENSMUSG00000020669	Sh3yl1	0.834868	0.00205168	0.0225786	Up
ENSMUSG00000020676	Ccl11	0.846026	2.6e-05	0.000598331	Up
ENSMUSG00000020709	Adap2	0.980581	1.87e-05	0.000452262	Up
ENSMUSG00000020841	Cpd	0.746936	1.46e-08	7.56e-07	Up
ENSMUSG00000020865	Abcc3	0.878418	2.75e-05	0.000627678	Up
ENSMUSG00000020952	Scfd1	0.409353	0.000634632	0.00869692	Up
ENSMUSG00000020961	Ston2	0.331351	0.00383428	0.0369489	Up
ENSMUSG00000021013	Ttc8	0.850407	2.73e-05	0.000624568	Up
ENSMUSG00000021027	Ralgapa1	0.270701	8.87e-05	0.00170489	Up
ENSMUSG00000021061	Sptb	0.500644	0.000147679	0.00262294	Up
ENSMUSG00000021091	Serpina3n	1.08838	3.92e-05	0.000849723	Up
ENSMUSG00000021097	Clmn	0.717262	0.00101872	0.0128385	Up
ENSMUSG00000021109	Hif1a	0.290774	0.00100377	0.0126963	Up
ENSMUSG00000021118	Plek2	0.98495	0.0018273	0.0206164	Up
ENSMUSG00000021185	Dglucy	0.627239	0.000223542	0.00368279	Up
ENSMUSG00000021188	Trip11	0.366464	1.14e-05	0.000295648	Up
ENSMUSG00000021190	Lgmn	1.04946	1.41e-18	2.43e-16	Up
ENSMUSG00000021198	Unc79	1.56165	2.44e-06	7.68e-05	Up
ENSMUSG00000021224	Numb	0.429787	8.35e-06	0.000223773	Up
ENSMUSG00000021238	Aldh6a1	0.448195	8.87e-05	0.00170479	Up
ENSMUSG00000021285	Ppp1r13b	0.34999	0.00208957	0.0229389	Up
ENSMUSG00000021306	Gpr137b	0.83252	0.000274522	0.00435336	Up
ENSMUSG00000021313	Ryr2	1.50614	0.00124014	0.0150705	Up
ENSMUSG00000021318	Gli3	0.979286	2.64e-13	2.82e-11	Up
ENSMUSG00000021338	Carmil1	0.624847	0.000356129	0.00544968	Up
ENSMUSG00000021340	Gpld1	0.787012	0.000186786	0.00318603	Up
ENSMUSG00000021356	Irf4	0.498582	0.000577864	0.00804818	Up
ENSMUSG00000021365	Nedd9	0.498136	3.97e-15	5.1e-13	Up
ENSMUSG00000021375	Kif13a	0.492621	0.00452571	0.0414244	Up
ENSMUSG00000021392	Nol8	0.392567	1.92e-05	0.000461699	Up
ENSMUSG00000021423	Ly86	1.00938	5.01e-12	4.53e-10	Up
ENSMUSG00000021477	Ctsl	0.602866	1.16e-07	4.95e-06	Up
ENSMUSG00000021510	Zfp729a	0.477637	1.75e-06	5.72e-05	Up
ENSMUSG00000021519	Mterf3	0.335562	0.000595438	0.00824945	Up
ENSMUSG00000021548	Ccnh	0.326429	0.00302709	0.0308134	Up
ENSMUSG00000021549	Rasa1	0.342929	7.25e-05	0.00143509	Up
ENSMUSG00000021556	Golm1	0.803478	0.00480898	0.0434233	Up
ENSMUSG00000021573	Tppp	0.463526	8.39e-05	0.00162805	Up
ENSMUSG00000021583	Erap1	0.420688	6.66e-06	0.000183842	Up
ENSMUSG00000021585	Cast	0.290992	3.64e-05	0.000794984	Up
ENSMUSG00000021591	Glrx	0.6808	0.00125658	0.0152235	Up
ENSMUSG00000021592	Arsk	0.682387	4.27e-07	1.62e-05	Up
ENSMUSG00000021596	Mctp1	0.793573	0.000129346	0.00234467	Up
ENSMUSG00000021624	Cd180	0.940573	4.34e-05	0.000929803	Up
ENSMUSG00000021662	Arhgef28	0.720135	0.00116499	0.014301	Up
ENSMUSG00000021665	Hexb	0.623516	2.84e-06	8.8e-05	Up
ENSMUSG00000021668	Polk	0.272271	0.00331798	0.03319	Up
ENSMUSG00000021678	F2rl1	0.698769	0.00218198	0.023656	Up
ENSMUSG00000021687	Scamp1	0.790514	0.000169438	0.00293618	Up
ENSMUSG00000021701	Plk2	0.852486	0.00273562	0.0284894	Up
ENSMUSG00000021708	Rasgrf2	0.409853	0.00509595	0.0453867	Up
ENSMUSG00000021709	Erbin	0.420361	2.29e-07	9.21e-06	Up
ENSMUSG00000021720	Rnf180	0.946145	4.93e-07	1.85e-05	Up
ENSMUSG00000021725	Parp8	0.772718	7.01e-12	6.21e-10	Up
ENSMUSG00000021728	Emb	0.305259	1.49e-05	0.000372377	Up
ENSMUSG00000021732	Fgf10	1.26327	5.58e-05	0.0011456	Up
ENSMUSG00000021738	Atxn7	0.308873	0.000559763	0.00785126	Up
ENSMUSG00000021745	Ptprg	0.516975	8.7e-05	0.00167792	Up
ENSMUSG00000021749	Oit1	1.39668	0.00147816	0.0174842	Up
ENSMUSG00000021750	Fam107a	1.01505	0.000387369	0.00582333	Up
ENSMUSG00000021756	Il6st	0.320964	2.59e-12	2.46e-10	Up
ENSMUSG00000021772	Nkiras1	0.350389	0.00568354	0.0495075	Up
ENSMUSG00000021779	Thrb	0.615348	0.000666083	0.00903863	Up
ENSMUSG00000021796	Bmpr1a	0.813992	9.21e-10	5.79e-08	Up
ENSMUSG00000021823	Vcl	0.350365	0.000179227	0.00307412	Up
ENSMUSG00000021838	Samd4	0.83852	0.0015431	0.0181287	Up
ENSMUSG00000021843	Ktn1	0.300536	7.18e-05	0.0014237	Up
ENSMUSG00000021876	Rnase4	0.682043	4.68e-05	0.000991157	Up
ENSMUSG00000021886	Gpr65	1.09136	3.93e-09	2.22e-07	Up
ENSMUSG00000021893	Capn7	0.296891	0.00263279	0.0276207	Up
ENSMUSG00000021895	Arhgef3	0.361159	0.00178395	0.0204136	Up
ENSMUSG00000021903	Galnt15	0.877383	6.99e-05	0.00139081	Up
ENSMUSG00000021906	Oxnad1	0.408428	0.00100633	0.0127252	Up
ENSMUSG00000021908	Gm6768	0.458979	4.26e-05	0.000913644	Up
ENSMUSG00000021930	Spryd7	0.841236	4.17e-06	0.000123356	Up
ENSMUSG00000021939	Ctsb	0.449841	0.00233913	0.0250465	Up
ENSMUSG00000021945	Zmym2	0.408777	6.52e-10	4.19e-08	Up
ENSMUSG00000021950	Anxa8	1.30122	3.5e-05	0.000770123	Up
ENSMUSG00000021974	Fgf9	1.18305	0.000207014	0.00345773	Up
ENSMUSG00000021981	Cab39l	0.566643	4.14e-06	0.00012247	Up
ENSMUSG00000021983	Atp8a2	0.741994	0.00144809	0.0171846	Up
ENSMUSG00000021998	Lcp1	0.382733	5.31e-05	0.00109996	Up
ENSMUSG00000022010	Tsc22d1	0.544773	2.85e-12	2.68e-10	Up
ENSMUSG00000022026	Olfm4	0.739434	0.000638078	0.00873983	Up
ENSMUSG00000022037	Clu	0.875462	0.000548184	0.00772399	Up
ENSMUSG00000022054	Nefm	0.586432	1.67e-06	5.52e-05	Up
ENSMUSG00000022057	Adamdec1	1.06041	6.1e-06	0.000171403	Up
ENSMUSG00000022119	Rbm26	0.357188	2.2e-06	6.99e-05	Up
ENSMUSG00000022122	Ednrb	1.05198	0.00476709	0.0431308	Up
ENSMUSG00000022132	Cldn10	0.599451	0.000219464	0.00362423	Up
ENSMUSG00000022139	Mbnl2	0.437829	9.38e-09	5.03e-07	Up
ENSMUSG00000022141	Nipbl	0.322948	0.00267483	0.0279665	Up
ENSMUSG00000022146	Osmr	1.10449	1.96e-12	1.89e-10	Up
ENSMUSG00000022150	Dab2	1.1461	7.51e-13	7.61e-11	Up
ENSMUSG00000022181	C6	1.97138	5.73e-12	5.13e-10	Up
ENSMUSG00000022184	Fbxo4	0.593468	0.00440101	0.0408769	Up
ENSMUSG00000022197	Pdzd2	0.727137	5.87e-10	3.79e-08	Up
ENSMUSG00000022228	Zscan26	0.586315	4.55e-08	2.13e-06	Up
ENSMUSG00000022231	Sema5a	0.930843	0.000146572	0.00260668	Up
ENSMUSG00000022246	Rai14	0.813904	5.22e-06	0.000149238	Up
ENSMUSG00000022257	Laptm4b	0.561854	0.000237213	0.00386102	Up
ENSMUSG00000022261	Sdc2	1.16787	1.55e-10	1.13e-08	Up
ENSMUSG00000022262	Dnah5	1.31527	2.25e-05	0.000528131	Up
ENSMUSG00000022263	Trio	0.354147	0.00498619	0.044632	Up
ENSMUSG00000022270	Fam134b	0.579069	9.34e-06	0.000247169	Up
ENSMUSG00000022272	Myo10	0.270881	0.0035412	0.0349814	Up
ENSMUSG00000022286	Grhl2	0.640812	0.000816131	0.0107795	Up
ENSMUSG00000022297	Fzd6	0.585231	0.000118713	0.00218693	Up
ENSMUSG00000022307	Oxr1	0.470703	4.36e-10	2.89e-08	Up
ENSMUSG00000022309	Angpt1	0.692335	0.00012325	0.00225684	Up
ENSMUSG00000022337	Emc2	0.393081	0.00106985	0.013331	Up
ENSMUSG00000022358	Fbxo32	0.569426	1.61e-05	0.000399148	Up
ENSMUSG00000022361	Zhx1	0.417165	2.64e-06	8.22e-05	Up
ENSMUSG00000022425	Enpp2	0.675954	5.81e-06	0.000163981	Up
ENSMUSG00000022438	Parvb	0.578279	0.00489209	0.0440018	Up
ENSMUSG00000022489	Pde1b	0.34374	0.00109341	0.0135585	Up
ENSMUSG00000022500	Litaf	0.68357	6.44e-05	0.00129621	Up
ENSMUSG00000022510	Trp63	0.975218	9.79e-25	2.7e-22	Up
ENSMUSG00000022512	Cldn1	0.840007	0.000982751	0.012464	Up
ENSMUSG00000022514	Il1rap	0.649196	2.15e-05	0.000506649	Up
ENSMUSG00000022528	Hes1	0.501972	0.00186066	0.0208866	Up
ENSMUSG00000022548	Apod	2.02172	5.8e-17	8.85e-15	Up
ENSMUSG00000022564	Grina	0.498566	1.64e-08	8.39e-07	Up
ENSMUSG00000022579	Gpihbp1	1.15939	0.000855043	0.0111843	Up
ENSMUSG00000022584	Ly6c2	1.42344	2.99e-12	2.8e-10	Up
ENSMUSG00000022586	Ly6i	1.41533	3.51e-06	0.000105935	Up
ENSMUSG00000022629	Kif21a	0.803398	5.34e-14	6.17e-12	Up
ENSMUSG00000022636	Alcam	0.999338	3.14e-29	1.24e-26	Up
ENSMUSG00000022637	Cblb	0.390637	0.000378657	0.00572495	Up
ENSMUSG00000022641	Bbx	0.407555	7.74e-06	0.000209271	Up
ENSMUSG00000022659	Gcsam	0.863986	0.000919206	0.0118037	Up
ENSMUSG00000022667	Cd200r1	1.15103	9.56e-10	6e-08	Up
ENSMUSG00000022676	Snai2	0.916297	0.00416654	0.0392778	Up
ENSMUSG00000022687	Boc	0.706031	1.95e-05	0.000467033	Up
ENSMUSG00000022696	Sidt1	0.583241	0.00014171	0.00252914	Up
ENSMUSG00000022708	Zbtb20	0.430517	9.61e-09	5.13e-07	Up
ENSMUSG00000022723	Crybg3	0.611176	7.39e-07	2.65e-05	Up
ENSMUSG00000022747	St3gal6	0.644457	3.04e-05	0.000683981	Up
ENSMUSG00000022749	Tbc1d23	0.282309	0.00481019	0.0434272	Up
ENSMUSG00000022788	Fgd4	0.985715	4.01e-13	4.18e-11	Up
ENSMUSG00000022808	Snx4	0.302107	0.00139263	0.0166392	Up
ENSMUSG00000022824	Muc13	1.4574	1.53e-08	7.89e-07	Up
ENSMUSG00000022836	Mylk	0.626526	0.00411781	0.0389176	Up
ENSMUSG00000022865	Cxadr	0.411472	0.000775158	0.0103144	Up
ENSMUSG00000022876	Samsn1	0.946285	1.39e-08	7.26e-07	Up
ENSMUSG00000022883	Robo1	0.567719	0.00499195	0.0446539	Up
ENSMUSG00000022885	St6gal1	0.533477	5.16e-07	1.93e-05	Up
ENSMUSG00000022892	App	0.601456	0.000179546	0.00307791	Up
ENSMUSG00000022893	Adamts1	0.776158	9.14e-05	0.00174871	Up
ENSMUSG00000022900	Ildr1	0.73952	0.00217262	0.0235996	Up
ENSMUSG00000022901	Cd86	1.25245	5.02e-16	7.07e-14	Up
ENSMUSG00000022906	Parp9	0.788642	3.92e-06	0.000116804	Up
ENSMUSG00000022912	Pros1	0.57497	0.0030113	0.0306928	Up
ENSMUSG00000022946	Dopey2	0.390604	0.000597357	0.00826839	Up
ENSMUSG00000022957	Itsn1	0.590263	5.89e-07	2.17e-05	Up
ENSMUSG00000022995	Enah	0.653901	9.95e-05	0.00188558	Up
ENSMUSG00000023022	Lima1	0.633549	5.23e-09	2.92e-07	Up
ENSMUSG00000023048	Prr13	0.556713	7.66e-05	0.00150305	Up
ENSMUSG00000023064	Sncg	0.900035	0.00342446	0.034083	Up
ENSMUSG00000023088	Abcc1	0.368033	0.00312796	0.0316256	Up
ENSMUSG00000023186	Vwa5a	0.568177	2.59e-05	0.000595438	Up
ENSMUSG00000023206	Il15ra	0.823238	7.21e-07	2.59e-05	Up
ENSMUSG00000023216	Epb42	1.3533	0.000214573	0.00356088	Up
ENSMUSG00000023224	Serping1	0.739535	4.68e-05	0.000991806	Up
ENSMUSG00000023249	Parp3	0.618678	5.04e-07	1.88e-05	Up
ENSMUSG00000023341	Mx2	1.339	0.00168696	0.0195131	Up
ENSMUSG00000023367	Tmem176a	0.698394	0.000275438	0.0043629	Up
ENSMUSG00000023826	Park2	1.30043	3.66e-10	2.46e-08	Up
ENSMUSG00000023892	Zfp51	0.628477	0.000978706	0.0124212	Up
ENSMUSG00000023913	Pla2g7	1.57826	1.39e-17	2.24e-15	Up
ENSMUSG00000023959	Clic5	0.63404	8.36e-06	0.000223773	Up
ENSMUSG00000023960	Enpp5	1.13676	5.94e-12	5.31e-10	Up
ENSMUSG00000023961	Enpp4	0.447464	0.00015724	0.002761	Up
ENSMUSG00000023999	Kif6	1.04313	0.000911576	0.011722	Up
ENSMUSG00000024030	Abcg1	0.388567	6.93e-05	0.00138101	Up
ENSMUSG00000024044	Epb41l3	0.840414	2.54e-06	7.96e-05	Up
ENSMUSG00000024059	Clip4	0.58149	0.000498047	0.00714271	Up
ENSMUSG00000024066	Xdh	0.849322	1.74e-06	5.69e-05	Up
ENSMUSG00000024074	Crim1	0.442468	0.00117024	0.0143562	Up
ENSMUSG00000024079	Eif2ak2	0.730283	2.69e-05	0.000616712	Up
ENSMUSG00000024083	Pja2	0.349347	0.000226917	0.00372292	Up
ENSMUSG00000024084	Qpct	1.07657	0.000603373	0.00833857	Up
ENSMUSG00000024085	Man2a1	0.286471	0.000100781	0.00190335	Up
ENSMUSG00000024087	Cyp1b1	0.791289	4.52e-05	0.000961683	Up
ENSMUSG00000024098	Twsg1	0.526036	1.18e-07	5.04e-06	Up
ENSMUSG00000024143	Rhoq	0.588801	9.53e-06	0.000251627	Up
ENSMUSG00000024164	C3	0.656132	0.000606943	0.00837543	Up
ENSMUSG00000024172	St6gal2	1.4687	0.000285692	0.00448563	Up
ENSMUSG00000024174	Pot1b	0.38164	0.000244674	0.00396155	Up
ENSMUSG00000024211	Grm8	0.75151	0.000483942	0.00698375	Up
ENSMUSG00000024228	Nudt12	1.05387	8.21e-05	0.0015982	Up
ENSMUSG00000024242	Map4k3	0.568442	1.87e-08	9.53e-07	Up
ENSMUSG00000024277	Mapre2	0.463596	1.12e-05	0.00029055	Up
ENSMUSG00000024283	Wac	0.336329	0.000190282	0.00323871	Up
ENSMUSG00000024293	Esco1	0.555734	4.23e-05	0.000908981	Up
ENSMUSG00000024302	Dtna	1.09249	0.00109348	0.0135585	Up
ENSMUSG00000024304	Cdh2	0.763893	0.00169878	0.0196252	Up
ENSMUSG00000024331	Dsc2	0.630383	9.27e-06	0.000245555	Up
ENSMUSG00000024334	H2-Oa	0.58824	0.00240796	0.0256647	Up
ENSMUSG00000024340	Btnl2	1.49388	0.00232328	0.0249153	Up
ENSMUSG00000024349	Tmem173	0.469435	0.0052545	0.0464632	Up
ENSMUSG00000024376	Epb41l4a	0.532285	0.0012216	0.0148843	Up
ENSMUSG00000024395	Lims2	1.30005	1.34e-05	0.000340056	Up
ENSMUSG00000024401	Tnf	0.827113	0.000383048	0.00577716	Up
ENSMUSG00000024411	Aqp4	0.809399	0.000434285	0.00638674	Up
ENSMUSG00000024421	Lama3	1.06214	2.85e-25	8.31e-23	Up
ENSMUSG00000024423	Impact	0.337826	0.000284059	0.00446252	Up
ENSMUSG00000024430	Cabyr	0.975889	0.0043016	0.0402161	Up
ENSMUSG00000024457	Trim26	0.556436	0.000195418	0.0033119	Up
ENSMUSG00000024479	Mal2	1.89889	3.95e-06	0.000117723	Up
ENSMUSG00000024483	Ankhd1	0.268713	0.000165134	0.00287866	Up
ENSMUSG00000024486	Hbegf	1.2092	0.00186846	0.0209529	Up
ENSMUSG00000024487	Yipf5	0.441544	5.53e-05	0.00113678	Up
ENSMUSG00000024511	Rab27b	1.29128	1.18e-06	4.05e-05	Up
ENSMUSG00000024517	Grp	1.07388	0.00215268	0.0234437	Up
ENSMUSG00000024529	Lox	0.66562	0.00173349	0.0199515	Up
ENSMUSG00000024534	Sncaip	1.26244	5.23e-06	0.000149439	Up
ENSMUSG00000024548	Setbp1	0.64907	0.000180965	0.00309532	Up
ENSMUSG00000024597	Slc12a2	0.493864	4.28e-05	0.000917857	Up
ENSMUSG00000024610	Cd74	0.500904	0.00290174	0.0297779	Up
ENSMUSG00000024621	Csf1r	0.975577	2.27e-10	1.6e-08	Up
ENSMUSG00000024639	Gnaq	0.615467	6.14e-06	0.000172363	Up
ENSMUSG00000024642	Tle4	0.52021	9e-05	0.00172537	Up
ENSMUSG00000024659	Anxa1	1.00145	1.4e-12	1.37e-10	Up
ENSMUSG00000024663	Rab3il1	0.797678	8.24e-05	0.00160208	Up
ENSMUSG00000024672	Ms4a7	1.22461	4.15e-08	1.96e-06	Up
ENSMUSG00000024673	Ms4a1	1.27262	6.66e-05	0.00133413	Up
ENSMUSG00000024677	Ms4a6b	0.667916	6.43e-07	2.34e-05	Up
ENSMUSG00000024678	Ms4a4d	1.26902	1.63e-06	5.41e-05	Up
ENSMUSG00000024679	Ms4a6d	1.37626	1.78e-08	9.08e-07	Up
ENSMUSG00000024696	Lpxn	0.491204	1.33e-05	0.000336808	Up
ENSMUSG00000024697	Gna14	0.851185	4.92e-05	0.00103168	Up
ENSMUSG00000024727	Trpm6	0.934167	0.00193724	0.0215544	Up
ENSMUSG00000024737	Slc15a3	1.01618	2.72e-05	0.000621296	Up
ENSMUSG00000024789	Jak2	0.335151	2.38e-06	7.51e-05	Up
ENSMUSG00000024812	Tjp2	0.572069	0.00116522	0.014301	Up
ENSMUSG00000024846	Cst6	0.960279	0.000740824	0.00992816	Up
ENSMUSG00000024867	Pip5k1b	0.414346	0.00049992	0.00716586	Up
ENSMUSG00000024887	Asah2	0.81241	2.47e-08	1.22e-06	Up
ENSMUSG00000024910	Ctsw	0.461372	0.000302427	0.0047104	Up
ENSMUSG00000024921	Smarca2	0.313151	0.00313748	0.0317045	Up
ENSMUSG00000024924	Vldlr	1.13788	2.25e-12	2.15e-10	Up
ENSMUSG00000024985	Tcf7l2	0.698897	3.16e-07	1.24e-05	Up
ENSMUSG00000024986	Hhex	0.828224	0.00298583	0.0304858	Up
ENSMUSG00000024998	Plce1	0.624384	0.000872275	0.0113187	Up
ENSMUSG00000025017	Pik3ap1	0.910481	0.000281928	0.00443782	Up
ENSMUSG00000025026	Add3	0.290725	0.00365566	0.0358948	Up
ENSMUSG00000025044	Msr1	1.89418	6.03e-15	7.69e-13	Up
ENSMUSG00000025058	5430427O19Rik	1.85739	6.53e-10	4.2e-08	Up
ENSMUSG00000025083	Afap1l2	0.646542	0.000182238	0.00311517	Up
ENSMUSG00000025104	Hdgfl3	0.288957	0.00135248	0.016233	Up
ENSMUSG00000025105	Bnc1	0.908962	3.02e-07	1.19e-05	Up
ENSMUSG00000025150	Cbr2	0.952341	4.83e-12	4.38e-10	Up
ENSMUSG00000025151	Maged1	0.743032	2.76e-07	1.09e-05	Up
ENSMUSG00000025163	Cd7	0.900447	0.000156091	0.00274691	Up
ENSMUSG00000025207	Sema4g	0.564613	0.00131244	0.0158318	Up
ENSMUSG00000025212	Sfxn3	0.386731	8.72e-05	0.00167907	Up
ENSMUSG00000025232	Hexa	0.424789	0.00184633	0.0207804	Up
ENSMUSG00000025245	Lztfl1	0.529763	4.31e-06	0.000126781	Up
ENSMUSG00000025262	Fam120c	0.467082	2.82e-05	0.000642697	Up
ENSMUSG00000025277	Abhd6	0.558957	0.00232416	0.0249199	Up
ENSMUSG00000025278	Flnb	0.316686	0.000760791	0.0101623	Up
ENSMUSG00000025283	Sat1	0.417776	0.0033364	0.0333261	Up
ENSMUSG00000025287	Acot9	0.388015	0.00130914	0.0157982	Up
ENSMUSG00000025321	Itgb8	0.708328	0.00184006	0.0207304	Up
ENSMUSG00000025323	Sp4	0.381336	0.000439828	0.00645116	Up
ENSMUSG00000025351	Cd63	0.529862	0.00355243	0.0350736	Up
ENSMUSG00000025370	Cdh9	1.14972	0.00346177	0.0343927	Up
ENSMUSG00000025429	Pstpip2	0.53764	0.000128177	0.00233049	Up
ENSMUSG00000025432	Avil	0.656981	0.00545966	0.0479943	Up
ENSMUSG00000025491	Ifitm1	0.954072	0.000373532	0.00566235	Up
ENSMUSG00000025492	Ifitm3	0.751933	0.000251146	0.00404157	Up
ENSMUSG00000025498	Irf7	1.01778	0.00196593	0.021795	Up
ENSMUSG00000025504	Eps8l2	1.0435	1.59e-09	9.63e-08	Up
ENSMUSG00000025515	Muc2	1.74074	0.00176697	0.0202779	Up
ENSMUSG00000025531	Chm	0.44985	2.65e-05	0.000607747	Up
ENSMUSG00000025555	Farp1	0.70168	7.42e-09	4.03e-07	Up
ENSMUSG00000025558	Dock9	0.358643	0.00288263	0.0296123	Up
ENSMUSG00000025597	Klhl4	0.859807	2.3e-05	0.000538405	Up
ENSMUSG00000025647	Shisa5	0.551417	0.000666654	0.00904416	Up
ENSMUSG00000025701	Alox5	0.741628	0.00105993	0.0132314	Up
ENSMUSG00000025702	43167	0.457022	0.000265069	0.00422587	Up
ENSMUSG00000025743	Sdc3	0.734352	1.4e-05	0.000353542	Up
ENSMUSG00000025757	Hspa4l	0.375596	0.00222206	0.0240108	Up
ENSMUSG00000025780	Itih5	0.578438	5.71e-05	0.00116864	Up
ENSMUSG00000025791	Pgm2	0.35855	0.00448684	0.0411303	Up
ENSMUSG00000025804	Ccr1	0.811386	0.00460443	0.0419454	Up
ENSMUSG00000025808	Ccdc7a	1.1624	8.92e-05	0.00171196	Up
ENSMUSG00000025812	Pard3	0.851419	3.18e-09	1.83e-07	Up
ENSMUSG00000025815	Dhtkd1	1.25113	2.92e-05	0.000662024	Up
ENSMUSG00000025867	Cplx2	0.750947	0.00170688	0.0197024	Up
ENSMUSG00000025876	Unc5a	0.579464	0.000604752	0.00835138	Up
ENSMUSG00000025887	Casp12	0.959928	6.63e-07	2.41e-05	Up
ENSMUSG00000025888	Casp1	1.03376	7.16e-11	5.52e-09	Up
ENSMUSG00000025907	Rb1cc1	0.449907	1.13e-06	3.9e-05	Up
ENSMUSG00000025915	Sgk3	0.408875	3.52e-07	1.36e-05	Up
ENSMUSG00000025931	Paqr8	0.851556	4.14e-09	2.34e-07	Up
ENSMUSG00000025932	Eya1	1.10816	4.13e-18	6.97e-16	Up
ENSMUSG00000025935	Tram1	0.30976	0.000433133	0.00637826	Up
ENSMUSG00000025936	Gm4956	1.2364	0.00271652	0.0283437	Up
ENSMUSG00000025937	Lactb2	0.453853	0.00324705	0.0325862	Up
ENSMUSG00000025938	Slco5a1	0.606055	0.000232786	0.00379899	Up
ENSMUSG00000025939	Ube2w	0.380695	0.000217074	0.00359331	Up
ENSMUSG00000025986	Slc39a10	0.467727	0.000226647	0.0037196	Up
ENSMUSG00000025993	Slc40a1	0.888974	6.58e-07	2.4e-05	Up
ENSMUSG00000026009	Icos	0.7104	3.67e-07	1.41e-05	Up
ENSMUSG00000026014	Raph1	0.646771	2.99e-09	1.73e-07	Up
ENSMUSG00000026029	Casp8	0.323766	0.00390705	0.0372492	Up
ENSMUSG00000026062	Slc9a2	0.99316	5.37e-06	0.000153137	Up
ENSMUSG00000026068	Il18rap	1.24375	2.96e-07	1.17e-05	Up
ENSMUSG00000026070	Il18r1	0.761047	0.000689978	0.00933926	Up
ENSMUSG00000026072	Il1r1	0.740345	4.63e-06	0.000134638	Up
ENSMUSG00000026073	Il1r2	1.03389	0.00257561	0.0271235	Up
ENSMUSG00000026088	Mitd1	0.478352	0.000193663	0.00328517	Up
ENSMUSG00000026094	Stk17b	0.384599	1.8e-05	0.000436688	Up
ENSMUSG00000026102	Inpp1	0.427612	0.000280561	0.00442383	Up
ENSMUSG00000026104	Stat1	0.567136	0.00285915	0.0294498	Up
ENSMUSG00000026131	Dst	0.592345	6.76e-11	5.22e-09	Up
ENSMUSG00000026141	Col19a1	1.21817	0.000178837	0.00306838	Up
ENSMUSG00000026142	Rhbdd1	0.515529	1.42e-05	0.000357795	Up
ENSMUSG00000026153	Fam135a	1.17955	8.07e-08	3.57e-06	Up
ENSMUSG00000026158	Ogfrl1	0.521089	0.000241061	0.00391448	Up
ENSMUSG00000026166	Ccl20	1.12123	0.0025039	0.026509	Up
ENSMUSG00000026170	Cyp27a1	0.656405	0.000232602	0.00379711	Up
ENSMUSG00000026177	Slc11a1	0.734455	4.83e-05	0.00101677	Up
ENSMUSG00000026185	Igfbp5	1.19021	6.55e-15	8.3e-13	Up
ENSMUSG00000026222	Sp100	0.738283	1.56e-11	1.32e-09	Up
ENSMUSG00000026224	4933407L21Rik	0.915603	0.0015551	0.0182273	Up
ENSMUSG00000026235	Epha4	0.654925	0.00451038	0.0412983	Up
ENSMUSG00000026249	Serpine2	0.452272	0.00226585	0.0243937	Up
ENSMUSG00000026271	Gpr35	0.691093	0.000706406	0.00952292	Up
ENSMUSG00000026288	Inpp5d	0.269231	0.00155272	0.0182109	Up
ENSMUSG00000026335	Pam	0.325126	0.00367008	0.0359829	Up
ENSMUSG00000026342	Slc35f5	0.622685	0.00348096	0.0345401	Up
ENSMUSG00000026357	Rgs18	1.20369	9.02e-05	0.00172795	Up
ENSMUSG00000026358	Rgs1	1.06563	3.7e-08	1.76e-06	Up
ENSMUSG00000026360	Rgs2	0.416471	0.00413139	0.0390126	Up
ENSMUSG00000026365	Cfh	1.13334	1.92e-07	7.85e-06	Up
ENSMUSG00000026380	Tfcp2l1	0.71567	1.03e-07	4.47e-06	Up
ENSMUSG00000026383	Epb41l5	0.618298	0.00206656	0.0227199	Up
ENSMUSG00000026395	Ptprc	0.419345	1.23e-05	0.000313561	Up
ENSMUSG00000026399	Cd55	0.772098	0.000654401	0.00892156	Up
ENSMUSG00000026417	Pigr	0.794475	0.00501778	0.0448272	Up
ENSMUSG00000026469	Xpr1	0.310729	0.000691772	0.00935975	Up
ENSMUSG00000026473	Glul	0.518414	1.57e-06	5.22e-05	Up
ENSMUSG00000026479	Lamc2	0.57432	0.000408685	0.00608607	Up
ENSMUSG00000026480	Ncf2	0.507817	0.00115876	0.0142405	Up
ENSMUSG00000026482	Rgl1	0.687958	1.17e-06	4.02e-05	Up
ENSMUSG00000026483	Fam129a	0.757223	4.05e-13	4.21e-11	Up
ENSMUSG00000026509	Capn2	0.37075	0.00182351	0.0205988	Up
ENSMUSG00000026535	Ifi202b	1.40987	7.64e-06	0.000207178	Up
ENSMUSG00000026546	Cfap45	0.897832	0.00345957	0.0343841	Up
ENSMUSG00000026566	Mpzl1	1.20942	0.00096678	0.012298	Up
ENSMUSG00000026571	Dcaf6	0.280477	0.00234314	0.0250835	Up
ENSMUSG00000026573	Xcl1	1.34873	5.5e-05	0.00113341	Up
ENSMUSG00000026579	F5	1.13608	3.22e-05	0.000717891	Up
ENSMUSG00000026581	Sell	0.549416	5.68e-08	2.61e-06	Up
ENSMUSG00000026586	Prrx1	0.816494	0.00176071	0.0202186	Up
ENSMUSG00000026604	Ptpn14	0.292102	0.000142975	0.00254843	Up
ENSMUSG00000026616	Cr2	0.930546	7.3e-08	3.26e-06	Up
ENSMUSG00000026620	Mark1	1.24799	5.05e-05	0.00105287	Up
ENSMUSG00000026621	43160	0.922716	0.00493627	0.0442785	Up
ENSMUSG00000026630	Batf3	0.845595	0.00241167	0.0256993	Up
ENSMUSG00000026632	Tatdn3	0.525134	0.00539533	0.0475191	Up
ENSMUSG00000026637	Traf5	0.442864	0.00444442	0.0409096	Up
ENSMUSG00000026639	Lamb3	0.604392	3.72e-08	1.77e-06	Up
ENSMUSG00000026640	Plxna2	0.772238	0.000823367	0.0108544	Up
ENSMUSG00000026648	Dclre1c	0.330665	0.00107272	0.0133607	Up
ENSMUSG00000026656	Fcgr2b	0.996284	2.11e-05	0.000499206	Up
ENSMUSG00000026657	Frmd4a	0.735459	6.01e-10	3.88e-08	Up
ENSMUSG00000026664	Phyh	0.737381	5.54e-05	0.00113825	Up
ENSMUSG00000026678	Rgs5	0.91891	2.74e-05	0.000625988	Up
ENSMUSG00000026712	Mrc1	1.13743	2.85e-23	6.91e-21	Up
ENSMUSG00000026727	Rsu1	0.458249	3.69e-06	0.000110618	Up
ENSMUSG00000026730	Pter	0.71272	0.00419587	0.0395006	Up
ENSMUSG00000026754	Golga1	0.397033	1.32e-05	0.000334787	Up
ENSMUSG00000026764	Kif5c	0.614801	0.00187159	0.0209746	Up
ENSMUSG00000026768	Itga8	0.967642	0.00443705	0.0408835	Up
ENSMUSG00000026770	Il2ra	1.02761	2.03e-08	1.02e-06	Up
ENSMUSG00000026778	Prkcq	0.334773	4.19e-06	0.000123815	Up
ENSMUSG00000026781	Acbd5	0.291068	0.000643574	0.00880207	Up
ENSMUSG00000026832	Cytip	0.412895	2.55e-07	1.02e-05	Up
ENSMUSG00000026839	Upp2	1.17404	0.00507271	0.0452232	Up
ENSMUSG00000026872	Zeb2	0.812769	2.43e-14	2.9e-12	Up
ENSMUSG00000026896	Ifih1	1.19292	2.2e-07	8.92e-06	Up
ENSMUSG00000026950	Neb	1.39086	5.26e-08	2.43e-06	Up
ENSMUSG00000026971	Itgb6	1.59069	0.000258655	0.00414199	Up
ENSMUSG00000026980	Ly75	0.330976	0.00132835	0.0159877	Up
ENSMUSG00000026981	Il1rn	1.11185	9.87e-06	0.000259348	Up
ENSMUSG00000026987	Baz2b	0.363695	1.77e-09	1.06e-07	Up
ENSMUSG00000027002	Nckap1	0.663268	6.67e-08	3e-06	Up
ENSMUSG00000027007	Ssfa2	0.404942	0.000454143	0.00662087	Up
ENSMUSG00000027009	Itga4	0.28077	1.81e-05	0.000438899	Up
ENSMUSG00000027030	Stk39	0.867088	0.00019956	0.00336645	Up
ENSMUSG00000027078	Ube2l6	0.938281	0.000388252	0.00583503	Up
ENSMUSG00000027082	Tfpi	0.851776	0.00215661	0.0234635	Up
ENSMUSG00000027087	Itgav	0.34192	0.000485438	0.00699623	Up
ENSMUSG00000027104	Atf2	0.265494	0.000101566	0.00191491	Up
ENSMUSG00000027171	Prrg4	0.477695	0.00167568	0.0194029	Up
ENSMUSG00000027194	Ttc17	0.379545	2.33e-05	0.000543994	Up
ENSMUSG00000027199	Gatm	1.24958	0.000100403	0.0018988	Up
ENSMUSG00000027200	Sema6d	1.04316	3.41e-14	4.03e-12	Up
ENSMUSG00000027210	Meis2	0.915777	3.06e-11	2.49e-09	Up
ENSMUSG00000027253	Lrp4	0.487929	0.00259196	0.0272518	Up
ENSMUSG00000027276	Jag1	0.465237	0.00053547	0.00757949	Up
ENSMUSG00000027287	Snap23	0.27919	0.0053263	0.0470088	Up
ENSMUSG00000027322	Siglec1	1.85332	7.33e-09	4e-07	Up
ENSMUSG00000027356	Fermt1	0.535878	0.000279149	0.00440535	Up
ENSMUSG00000027360	Hdc	0.539308	0.00286582	0.029481	Up
ENSMUSG00000027363	Usp8	0.301637	0.0023551	0.0251627	Up
ENSMUSG00000027366	Sppl2a	0.302558	0.00353487	0.0349376	Up
ENSMUSG00000027398	Il1b	1.2891	0.0011936	0.0145911	Up
ENSMUSG00000027499	Pkia	0.960552	6.89e-05	0.00137403	Up
ENSMUSG00000027506	Tpd52	0.427415	3.61e-05	0.000791844	Up
ENSMUSG00000027514	Zbp1	1.27821	1.57e-08	8.1e-07	Up
ENSMUSG00000027624	Epb41l1	0.715631	0.002174	0.0235996	Up
ENSMUSG00000027634	Ndrg3	0.354914	4.85e-06	0.000140097	Up
ENSMUSG00000027639	Samhd1	0.676144	0.00062674	0.00860791	Up
ENSMUSG00000027660	Skil	0.480087	1.48e-07	6.14e-06	Up
ENSMUSG00000027663	Zmat3	0.325246	0.00572677	0.0498371	Up
ENSMUSG00000027676	Ccdc39	0.575774	0.00336761	0.0336076	Up
ENSMUSG00000027677	Ttc14	0.307207	0.000640892	0.00877403	Up
ENSMUSG00000027684	Mecom	1.11827	6.8e-07	2.46e-05	Up
ENSMUSG00000027692	Tnik	0.416835	3.44e-06	0.000104081	Up
ENSMUSG00000027695	Pld1	0.730021	8.95e-07	3.16e-05	Up
ENSMUSG00000027698	Nceh1	0.292243	0.00501647	0.0448226	Up
ENSMUSG00000027712	Anxa5	0.343079	0.0040591	0.0384478	Up
ENSMUSG00000027718	Il21	1.15639	0.00122453	0.0149101	Up
ENSMUSG00000027750	Postn	0.726425	0.000553327	0.00778263	Up
ENSMUSG00000027763	Mbnl1	0.269434	0.00121523	0.0148197	Up
ENSMUSG00000027765	P2ry1	0.978652	0.000556621	0.00782102	Up
ENSMUSG00000027777	Schip1	1.41002	0.00164874	0.0191469	Up
ENSMUSG00000027790	Sis	1.56977	9.98e-08	4.33e-06	Up
ENSMUSG00000027799	Nbea	0.785005	2.11e-07	8.55e-06	Up
ENSMUSG00000027854	Sike1	0.370693	4.52e-05	0.000961683	Up
ENSMUSG00000027860	Vangl1	0.726183	5.06e-06	0.000145483	Up
ENSMUSG00000027863	Cd2	0.666707	1.1e-12	1.09e-10	Up
ENSMUSG00000027865	Gdap2	0.452463	0.000333208	0.00513292	Up
ENSMUSG00000027882	Stxbp3	0.307225	0.000124465	0.00227327	Up
ENSMUSG00000027900	Dram2	0.951334	1.14e-08	6.03e-07	Up
ENSMUSG00000027901	Dennd2d	0.575845	8.96e-07	3.16e-05	Up
ENSMUSG00000027907	S100a11	0.956784	3.36e-07	1.31e-05	Up
ENSMUSG00000027947	Il6ra	0.644767	0.000274295	0.00435225	Up
ENSMUSG00000027962	Vcam1	0.849461	1.25e-07	5.31e-06	Up
ENSMUSG00000027981	Rnpc3	0.417467	0.000102711	0.00193323	Up
ENSMUSG00000027995	Tlr2	0.626481	0.000625066	0.00858704	Up
ENSMUSG00000028011	Tdo2	1.01807	0.00563832	0.049214	Up
ENSMUSG00000028015	Ctso	0.613147	1.45e-08	7.52e-07	Up
ENSMUSG00000028019	Pdgfc	0.894441	0.000652868	0.00890723	Up
ENSMUSG00000028024	Enpep	0.878311	2.49e-16	3.63e-14	Up
ENSMUSG00000028037	Ifi44	1.40259	5.5e-07	2.04e-05	Up
ENSMUSG00000028053	Ash1l	0.292485	0.000330785	0.00510267	Up
ENSMUSG00000028082	Sh3d19	0.633919	6.17e-06	0.00017296	Up
ENSMUSG00000028088	Fmo5	0.543826	3.43e-05	0.000758383	Up
ENSMUSG00000028128	F3	0.841271	4.1e-05	0.000884191	Up
ENSMUSG00000028161	Ppp3ca	0.487676	0.000257857	0.0041316	Up
ENSMUSG00000028173	Wls	0.383596	9.59e-06	0.00025293	Up
ENSMUSG00000028184	Adgrl2	0.746111	1.16e-07	4.95e-06	Up
ENSMUSG00000028207	Asph	0.656819	2.36e-05	0.000549599	Up
ENSMUSG00000028217	Cdh17	0.930179	0.000606796	0.00837543	Up
ENSMUSG00000028228	Cpne3	0.539772	8.57e-07	3.04e-05	Up
ENSMUSG00000028243	Ubxn2b	0.386897	0.00195268	0.0216827	Up
ENSMUSG00000028255	Clca1	1.22809	0.00437679	0.0407269	Up
ENSMUSG00000028262	Clca3a2	0.849396	8.37e-05	0.00162441	Up
ENSMUSG00000028268	Gbp3	0.597304	0.000906003	0.0116612	Up
ENSMUSG00000028270	Gbp2	0.931355	2.92e-10	2.01e-08	Up
ENSMUSG00000028277	Ube2j1	0.515807	5.81e-08	2.66e-06	Up
ENSMUSG00000028289	Epha7	1.53181	2.99e-05	0.00067497	Up
ENSMUSG00000028337	Coro2a	0.861818	0.000100391	0.0018988	Up
ENSMUSG00000028362	Tnfsf8	0.746587	0.000147351	0.00261885	Up
ENSMUSG00000028383	Hsdl2	0.426816	8.52e-05	0.0016492	Up
ENSMUSG00000028386	Slc46a2	0.874255	8.01e-05	0.0015643	Up
ENSMUSG00000028389	Zfp37	2.23583	8.66e-09	4.65e-07	Up
ENSMUSG00000028399	Ptprd	0.91362	3.24e-07	1.27e-05	Up
ENSMUSG00000028456	Unc13b	1.15601	2.7e-19	4.89e-17	Up
ENSMUSG00000028483	Snapc3	0.481714	4.11e-07	1.57e-05	Up
ENSMUSG00000028487	Bnc2	0.952272	8.31e-08	3.67e-06	Up
ENSMUSG00000028496	Mllt3	0.34677	0.00217506	0.023603	Up
ENSMUSG00000028497	Hacd4	0.74409	0.00247214	0.0262128	Up
ENSMUSG00000028517	Plpp3	0.681292	5.15e-06	0.000147862	Up
ENSMUSG00000028530	Jak1	0.263491	4.2e-05	0.000902099	Up
ENSMUSG00000028532	Cachd1	0.616396	0.00339287	0.0338233	Up
ENSMUSG00000028542	Slc6a9	1.18308	0.00148473	0.017547	Up
ENSMUSG00000028553	Angptl3	1.21087	0.00141787	0.0168899	Up
ENSMUSG00000028556	Dock7	0.970126	7.16e-09	3.92e-07	Up
ENSMUSG00000028557	Rnf11	0.447143	3.34e-05	0.000741823	Up
ENSMUSG00000028565	Nfia	0.591615	1.81e-05	0.000439174	Up
ENSMUSG00000028571	Cyp2j13	1.68805	0.00434361	0.0404897	Up
ENSMUSG00000028576	Ift74	0.481276	0.00428066	0.0400947	Up
ENSMUSG00000028599	Tnfrsf1b	0.510261	0.000518985	0.00737249	Up
ENSMUSG00000028644	Ermap	0.95615	0.0042979	0.0401963	Up
ENSMUSG00000028649	Macf1	0.452071	1.74e-11	1.46e-09	Up
ENSMUSG00000028657	Ppt1	0.292564	0.00205131	0.0225786	Up
ENSMUSG00000028771	Ptpn12	0.566602	1.08e-06	3.75e-05	Up
ENSMUSG00000028864	Hgf	0.863533	0.00145394	0.0172417	Up
ENSMUSG00000028967	Errfi1	0.453649	0.000153903	0.00271772	Up
ENSMUSG00000029004	Kmt2e	0.302647	0.000889122	0.0114919	Up
ENSMUSG00000029026	Trp73	1.30844	0.000835984	0.010984	Up
ENSMUSG00000029074	Ttll10	0.712458	0.00439225	0.0408297	Up
ENSMUSG00000029084	Cd38	1.02586	3.77e-10	2.52e-08	Up
ENSMUSG00000029086	Prom1	1.26856	0.000397603	0.00595682	Up
ENSMUSG00000029119	Man2b2	0.472255	1.78e-06	5.83e-05	Up
ENSMUSG00000029134	Plb1	0.931072	0.000960759	0.0122326	Up
ENSMUSG00000029135	Fosl2	0.527088	0.000741781	0.00993464	Up
ENSMUSG00000029184	Olfr109	1.06728	3.26e-06	9.93e-05	Up
ENSMUSG00000029185	Fam114a1	0.571815	0.00175446	0.0201623	Up
ENSMUSG00000029190	D5Ertd579e	0.427822	8.61e-10	5.45e-08	Up
ENSMUSG00000029207	Apbb2	0.455488	0.000536143	0.00758709	Up
ENSMUSG00000029209	Gnpda2	0.520964	7.41e-06	0.000201948	Up
ENSMUSG00000029238	Clock	0.65375	1.25e-11	1.07e-09	Up
ENSMUSG00000029260	Ugt2b34	1.62312	0.000110813	0.00206471	Up
ENSMUSG00000029287	Tgfbr3	0.384178	0.00374332	0.0365358	Up
ENSMUSG00000029298	Gbp9	0.924167	1.59e-07	6.56e-06	Up
ENSMUSG00000029309	Sparcl1	0.65415	0.00032976	0.00508968	Up
ENSMUSG00000029311	Hsd17b11	0.422748	0.00251077	0.0265564	Up
ENSMUSG00000029330	Cds1	0.471414	0.000160932	0.00282047	Up
ENSMUSG00000029338	Antxr2	0.400298	0.00103973	0.0130318	Up
ENSMUSG00000029370	Rassf6	0.837926	0.00132342	0.0159497	Up
ENSMUSG00000029381	Shroom3	0.71969	0.00188412	0.0210732	Up
ENSMUSG00000029410	Ppef2	0.814291	0.000608019	0.00838816	Up
ENSMUSG00000029417	Cxcl9	0.981487	2.3e-06	7.28e-05	Up
ENSMUSG00000029468	P2rx7	0.784205	0.000224287	0.00369289	Up
ENSMUSG00000029470	P2rx4	0.567653	2.14e-05	0.000504996	Up
ENSMUSG00000029530	Ccr9	0.502148	8.66e-06	0.000231037	Up
ENSMUSG00000029552	Tes	0.537611	4.65e-08	2.17e-06	Up
ENSMUSG00000029553	Tfec	0.982863	9.02e-07	3.18e-05	Up
ENSMUSG00000029561	Oasl2	0.905984	0.000103594	0.00194654	Up
ENSMUSG00000029640	Usp12	0.287009	0.000163775	0.00286053	Up
ENSMUSG00000029648	Flt1	0.850195	0.00020406	0.00341455	Up
ENSMUSG00000029759	Pon3	0.674409	0.000905066	0.0116518	Up
ENSMUSG00000029787	Avl9	0.323107	0.000131686	0.00238009	Up
ENSMUSG00000029802	Abcg2	0.396284	0.00083085	0.0109358	Up
ENSMUSG00000029804	Herc3	0.41972	1.05e-05	0.000274116	Up
ENSMUSG00000029810	Tmem176b	0.691077	0.000367655	0.00559826	Up
ENSMUSG00000029816	Gpnmb	1.19504	7.53e-06	0.000204506	Up
ENSMUSG00000029833	Trim24	0.33238	1.93e-06	6.21e-05	Up
ENSMUSG00000029859	Epha1	0.777123	8.81e-06	0.000234289	Up
ENSMUSG00000029919	Hpgds	0.645366	6.89e-07	2.49e-05	Up
ENSMUSG00000029925	Tbxas1	0.596365	0.00105409	0.013173	Up
ENSMUSG00000029994	Anxa4	0.723612	0.000169038	0.00293086	Up
ENSMUSG00000029998	Pcyox1	0.363276	0.000409979	0.00610207	Up
ENSMUSG00000029999	Tgfa	0.882755	0.00216873	0.0235693	Up
ENSMUSG00000030017	Reg3g	1.01493	5.42e-08	2.5e-06	Up
ENSMUSG00000030043	Tacr1	1.6214	2.72e-07	1.08e-05	Up
ENSMUSG00000030047	Arhgap25	0.31286	0.000866557	0.0112661	Up
ENSMUSG00000030064	Frmd4b	0.633562	2e-05	0.00047636	Up
ENSMUSG00000030074	Gxylt2	0.950884	0.00013279	0.00239802	Up
ENSMUSG00000030077	Chl1	0.670122	5.18e-07	1.93e-05	Up
ENSMUSG00000030107	Usp18	0.62782	0.00264726	0.0277358	Up
ENSMUSG00000030149	Klrk1	1.4892	5.46e-14	6.29e-12	Up
ENSMUSG00000030156	Cd69	0.885235	4.88e-20	9.2e-18	Up
ENSMUSG00000030157	Clec2d	0.786635	2.27e-08	1.13e-06	Up
ENSMUSG00000030200	Bcl2l14	0.966088	4.01e-07	1.53e-05	Up
ENSMUSG00000030201	Lrp6	0.307171	6.9e-07	2.49e-05	Up
ENSMUSG00000030214	Plbd1	0.746183	4.53e-08	2.12e-06	Up
ENSMUSG00000030249	Abcc9	0.853772	3.63e-06	0.000109082	Up
ENSMUSG00000030257	Srgap3	0.637656	1.96e-07	7.98e-06	Up
ENSMUSG00000030259	Rassf8	0.585456	6.21e-05	0.00126187	Up
ENSMUSG00000030313	Dennd5b	0.915563	5.63e-07	2.08e-05	Up
ENSMUSG00000030325	Klrb1c	0.963404	0.000404968	0.00604282	Up
ENSMUSG00000030345	Dyrk4	1.33115	0.00299753	0.0305686	Up
ENSMUSG00000030365	Clec2i	0.417302	1.22e-05	0.000312798	Up
ENSMUSG00000030447	Cyfip1	0.584973	1.74e-05	0.000425419	Up
ENSMUSG00000030465	Psd3	0.377413	8e-05	0.00156216	Up
ENSMUSG00000030468	Siglecg	1.04321	0.000222236	0.00366455	Up
ENSMUSG00000030469	Zfp719	0.325202	0.00417714	0.0393576	Up
ENSMUSG00000030474	Siglece	1.07589	0.00375857	0.0366459	Up
ENSMUSG00000030499	Kctd15	0.647772	0.00249243	0.0263988	Up
ENSMUSG00000030516	Tjp1	0.853658	1.06e-07	4.55e-06	Up
ENSMUSG00000030519	Apba2	0.524692	0.000683143	0.00925202	Up
ENSMUSG00000030522	Mtmr10	0.459926	0.000803875	0.0106473	Up
ENSMUSG00000030555	Ttc23	0.671917	7.19e-06	0.000196822	Up
ENSMUSG00000030559	Rab38	1.16763	0.0030174	0.0307317	Up
ENSMUSG00000030560	Ctsc	0.933022	4.83e-23	1.15e-20	Up
ENSMUSG00000030577	Cd22	1.42776	3.39e-06	0.000102907	Up
ENSMUSG00000030579	Tyrobp	0.726324	0.000708006	0.00953986	Up
ENSMUSG00000030615	Tmem126a	0.531606	0.000442965	0.0064886	Up
ENSMUSG00000030616	Sytl2	0.768668	3.95e-09	2.23e-07	Up
ENSMUSG00000030630	Fah	0.928685	1.39e-07	5.81e-06	Up
ENSMUSG00000030643	Rab30	0.983704	1.06e-05	0.000275409	Up
ENSMUSG00000030650	Tmc5	1.17156	0.000961789	0.0122401	Up
ENSMUSG00000030659	Nucb2	0.744665	0.000246811	0.00399265	Up
ENSMUSG00000030660	Pik3c2a	0.439592	2.6e-07	1.04e-05	Up
ENSMUSG00000030691	Fchsd2	0.30049	0.000392234	0.00588372	Up
ENSMUSG00000030701	Plekhb1	0.465256	0.000131432	0.00237627	Up
ENSMUSG00000030704	Rab6a	0.266912	0.00242628	0.0258104	Up
ENSMUSG00000030713	Klk7	2.07974	1.07e-06	3.74e-05	Up
ENSMUSG00000030737	Slco2b1	0.73167	2.02e-09	1.2e-07	Up
ENSMUSG00000030760	Acer3	0.588382	3.13e-05	0.000701621	Up
ENSMUSG00000030772	Dkk3	0.94051	0.000230391	0.00376931	Up
ENSMUSG00000030790	Adm	0.946283	0.00290269	0.0297821	Up
ENSMUSG00000030849	Fgfr2	0.699316	2.82e-05	0.000643379	Up
ENSMUSG00000030852	Tacc2	0.636554	3.93e-11	3.16e-09	Up
ENSMUSG00000030861	Acadsb	0.904284	2.47e-09	1.44e-07	Up
ENSMUSG00000030921	Trim30a	1.17386	2.28e-07	9.18e-06	Up
ENSMUSG00000030922	Lyrm1	1.33726	3.42e-06	0.000103572	Up
ENSMUSG00000030954	Gp2	1.01706	0.000466185	0.00676266	Up
ENSMUSG00000030970	Ctbp2	0.463271	0.00367121	0.0359839	Up
ENSMUSG00000031024	St5	0.694024	3.43e-08	1.65e-06	Up
ENSMUSG00000031026	Trim66	1.27763	0.0046026	0.041942	Up
ENSMUSG00000031079	Zfp300	1.35804	0.000195127	0.00330799	Up
ENSMUSG00000031099	Smarca1	0.902481	0.000253617	0.00407346	Up
ENSMUSG00000031119	Gpc4	0.683637	0.000763467	0.0101882	Up
ENSMUSG00000031129	Slc9a9	0.4059	1.77e-07	7.29e-06	Up
ENSMUSG00000031132	Cd40lg	0.709472	0.000697695	0.0094261	Up
ENSMUSG00000031133	Arhgef6	0.501301	6.49e-15	8.24e-13	Up
ENSMUSG00000031196	F8	1.04112	0.000449377	0.00656173	Up
ENSMUSG00000031214	Ophn1	1.10307	0.000149262	0.00264942	Up
ENSMUSG00000031216	Stard8	0.804235	6.03e-06	0.00016942	Up
ENSMUSG00000031229	Atrx	0.312166	0.00294544	0.0301372	Up
ENSMUSG00000031239	Itm2a	0.503181	1.28e-06	4.36e-05	Up
ENSMUSG00000031250	Tnmd	1.70081	0.00047189	0.00683471	Up
ENSMUSG00000031255	Sytl4	1.50468	0.00225192	0.0242626	Up
ENSMUSG00000031264	Btk	1.16088	0.00198954	0.0220346	Up
ENSMUSG00000031283	Chrdl1	1.84984	4.48e-07	1.7e-05	Up
ENSMUSG00000031289	Il13ra2	1.02256	0.00191298	0.0213358	Up
ENSMUSG00000031293	Rs1	1.66259	0.000184999	0.00315652	Up
ENSMUSG00000031298	Adgrg2	1.07436	3.06e-07	1.2e-05	Up
ENSMUSG00000031304	Il2rg	0.433327	2.46e-06	7.73e-05	Up
ENSMUSG00000031327	Chic1	1.04837	4.22e-06	0.000124413	Up
ENSMUSG00000031337	Mtm1	0.460871	0.00030247	0.0047104	Up
ENSMUSG00000031342	Gpm6b	0.839714	6.68e-06	0.00018427	Up
ENSMUSG00000031351	Zfp185	0.826461	0.000408281	0.00608169	Up
ENSMUSG00000031377	Bmx	1.20228	4.34e-05	0.000929779	Up
ENSMUSG00000031379	Pir	0.91848	0.00132883	0.0159877	Up
ENSMUSG00000031380	Vegfd	1.73785	0.000155945	0.00274523	Up
ENSMUSG00000031391	L1cam	0.58342	0.00143699	0.0170847	Up
ENSMUSG00000031438	Rnf128	0.632805	0.00082957	0.0109258	Up
ENSMUSG00000031447	Lamp1	0.274398	0.000795456	0.0105491	Up
ENSMUSG00000031451	Gas6	0.312286	0.00101703	0.0128284	Up
ENSMUSG00000031453	Rasa3	0.274762	0.00215344	0.0234454	Up
ENSMUSG00000031497	Tnfsf13b	0.78135	0.00476726	0.0431308	Up
ENSMUSG00000031523	Dlc1	0.67332	0.000193119	0.00328095	Up
ENSMUSG00000031539	Ap3m2	0.521714	7.94e-05	0.00155285	Up
ENSMUSG00000031548	Sfrp1	0.779405	3.02e-05	0.000681557	Up
ENSMUSG00000031561	Tenm3	0.79807	0.000120952	0.00222007	Up
ENSMUSG00000031586	Rbpms	0.57208	0.00406151	0.0384641	Up
ENSMUSG00000031591	Asah1	0.856565	7.36e-11	5.65e-09	Up
ENSMUSG00000031596	Slc7a2	1.06266	6.13e-11	4.79e-09	Up
ENSMUSG00000031600	Vps37a	0.349116	1.14e-05	0.000294459	Up
ENSMUSG00000031613	Hpgd	1.59937	1.14e-25	3.51e-23	Up
ENSMUSG00000031616	Ednra	1.06628	0.00127647	0.0154376	Up
ENSMUSG00000031618	Nr3c2	0.987156	6.36e-07	2.32e-05	Up
ENSMUSG00000031626	Sorbs2	1.14056	1.25e-07	5.3e-06	Up
ENSMUSG00000031631	Cfap97	0.446775	0.00172015	0.0198309	Up
ENSMUSG00000031635	Anxa10	1.46581	0.000248157	0.00400392	Up
ENSMUSG00000031639	Tlr3	1.37248	9.69e-13	9.66e-11	Up
ENSMUSG00000031647	Mfap3l	1.07464	3.18e-07	1.24e-05	Up
ENSMUSG00000031709	Tbc1d9	0.67744	5.5e-05	0.00113341	Up
ENSMUSG00000031714	Gab1	0.683909	6.19e-05	0.00125848	Up
ENSMUSG00000031749	St3gal2	0.525921	6.5e-06	0.000180727	Up
ENSMUSG00000031755	Bbs2	0.529697	0.00145276	0.0172342	Up
ENSMUSG00000031778	Cx3cl1	0.902402	1.23e-09	7.61e-08	Up
ENSMUSG00000031780	Ccl17	0.936441	0.000198369	0.0033527	Up
ENSMUSG00000031786	Drc7	1.11602	0.0018719	0.0209746	Up
ENSMUSG00000031802	Phxr4	0.873906	9.46e-12	8.26e-10	Up
ENSMUSG00000031824	6430548M08Rik	0.529935	0.000163575	0.00285958	Up
ENSMUSG00000031825	Crispld2	0.609248	0.00033419	0.0051466	Up
ENSMUSG00000031838	Ifi30	0.673104	1.04e-05	0.000271035	Up
ENSMUSG00000031870	Pgr	1.46374	2.24e-06	7.1e-05	Up
ENSMUSG00000031871	Cdh5	0.720089	1.42e-06	4.8e-05	Up
ENSMUSG00000031877	Ces2g	0.817186	0.00425391	0.039938	Up
ENSMUSG00000031925	Maml2	0.695079	1.8e-13	1.95e-11	Up
ENSMUSG00000031932	Gpr83	0.5895	0.00382346	0.0369489	Up
ENSMUSG00000031996	Aplp2	0.495643	1e-06	3.52e-05	Up
ENSMUSG00000032000	Birc3	0.413083	0.000633642	0.00868764	Up
ENSMUSG00000032009	Sesn3	0.464473	3.91e-09	2.21e-07	Up
ENSMUSG00000032013	Trim29	0.923606	7.49e-15	9.46e-13	Up
ENSMUSG00000032020	Ubash3b	0.588557	4.69e-05	0.000993117	Up
ENSMUSG00000032028	Nxpe2	1.33268	0.000175249	0.00301895	Up
ENSMUSG00000032046	Abhd12	0.400934	4.51e-05	0.000959343	Up
ENSMUSG00000032053	Pou2af1	0.771981	3.57e-05	0.000784992	Up
ENSMUSG00000032062	2310030G06Rik	1.12434	1.13e-05	0.000293287	Up
ENSMUSG00000032066	Bco2	1.6485	1.45e-05	0.00036366	Up
ENSMUSG00000032076	Cadm1	0.702351	2.15e-06	6.85e-05	Up
ENSMUSG00000032080	Apoa4	1.28843	0.00317702	0.0320224	Up
ENSMUSG00000032198	Dock6	0.403658	0.00556253	0.0487442	Up
ENSMUSG00000032238	Rora	0.498492	3.16e-05	0.000707533	Up
ENSMUSG00000032246	Calml4	0.68531	0.00428678	0.0401432	Up
ENSMUSG00000032261	Sh3bgrl2	0.952292	1.1e-08	5.84e-07	Up
ENSMUSG00000032265	Fam46a	1.0051	6.57e-05	0.00131758	Up
ENSMUSG00000032332	Col12a1	0.648601	5.29e-06	0.000150929	Up
ENSMUSG00000032336	Nptn	0.324199	0.00524097	0.0463805	Up
ENSMUSG00000032340	Neo1	0.70434	1.88e-05	0.000453864	Up
ENSMUSG00000032348	Gsta4	0.523342	0.00266577	0.0278875	Up
ENSMUSG00000032358	Fam83b	1.35121	7.02e-13	7.13e-11	Up
ENSMUSG00000032359	Ctsh	0.929673	2.59e-06	8.09e-05	Up
ENSMUSG00000032366	Tpm1	0.372802	0.000281278	0.00442885	Up
ENSMUSG00000032375	Aph1b	0.892197	0.00242108	0.0257749	Up
ENSMUSG00000032398	Snapc5	0.804429	2.09e-10	1.48e-08	Up
ENSMUSG00000032422	Snx14	0.384618	0.000775767	0.0103201	Up
ENSMUSG00000032440	Tgfbr2	0.379957	0.000503808	0.0072067	Up
ENSMUSG00000032470	Mras	0.732558	4.03e-06	0.000119523	Up
ENSMUSG00000032487	Ptgs2	0.643639	0.00429685	0.0401963	Up
ENSMUSG00000032497	Lrrfip2	0.393435	0.000822294	0.010843	Up
ENSMUSG00000032528	Vipr1	0.659117	0.00165808	0.0192312	Up
ENSMUSG00000032540	Abhd5	0.897695	2.81e-06	8.7e-05	Up
ENSMUSG00000032547	Ryk	0.839499	0.000119796	0.00220322	Up
ENSMUSG00000032548	Slco2a1	0.728266	1.78e-11	1.49e-09	Up
ENSMUSG00000032554	Trf	0.87565	5.04e-11	3.99e-09	Up
ENSMUSG00000032558	Nphp3	0.572084	0.00237325	0.0253435	Up
ENSMUSG00000032560	Dnajc13	0.333393	1.91e-06	6.16e-05	Up
ENSMUSG00000032561	Acpp	0.886238	4.64e-08	2.16e-06	Up
ENSMUSG00000032596	Uba7	0.48915	0.000804011	0.0106473	Up
ENSMUSG00000032661	Oas3	1.05279	0.00538544	0.0474622	Up
ENSMUSG00000032667	Pon2	0.363813	0.000723746	0.00972596	Up
ENSMUSG00000032688	Malt1	0.408175	1.77e-05	0.000430881	Up
ENSMUSG00000032690	Oas2	1.20471	0.00537647	0.0473907	Up
ENSMUSG00000032702	Kank1	0.502353	0.00298962	0.0305161	Up
ENSMUSG00000032712	2810474O19Rik	0.646255	2.52e-09	1.47e-07	Up
ENSMUSG00000032735	Ablim3	1.44212	1.91e-12	1.84e-10	Up
ENSMUSG00000032737	Inppl1	0.529933	0.00190252	0.0212362	Up
ENSMUSG00000032776	Mctp2	0.709438	9.33e-10	5.86e-08	Up
ENSMUSG00000032806	Slc10a3	0.610748	0.00508997	0.045348	Up
ENSMUSG00000032826	Ank2	0.702959	6.61e-06	0.000182845	Up
ENSMUSG00000032827	Ppp1r9a	0.731639	0.0013846	0.0165647	Up
ENSMUSG00000032846	Zswim6	0.541794	4.56e-08	2.13e-06	Up
ENSMUSG00000032875	Arhgef17	0.55701	6.54e-06	0.000181476	Up
ENSMUSG00000032878	Ccdc85a	1.42987	7.37e-06	0.000201145	Up
ENSMUSG00000032899	Styk1	1.13547	2.21e-08	1.11e-06	Up
ENSMUSG00000032908	Sgpp2	0.563198	0.00397922	0.037851	Up
ENSMUSG00000032925	Itgbl1	1.32106	2.62e-07	1.04e-05	Up
ENSMUSG00000032968	Inha	1.10305	0.00020341	0.00340985	Up
ENSMUSG00000033004	Mycbp2	0.300218	8.3e-09	4.47e-07	Up
ENSMUSG00000033024	Klra9	0.8068	0.00359216	0.0353777	Up
ENSMUSG00000033060	Lmo7	0.623123	6.82e-05	0.00136383	Up
ENSMUSG00000033082	Clec1a	0.717262	0.000978089	0.012419	Up
ENSMUSG00000033083	Tbc1d4	0.39147	0.00377779	0.036801	Up
ENSMUSG00000033111	3830406C13Rik	0.609285	0.000459853	0.00668305	Up
ENSMUSG00000033147	Slc22a15	0.430792	0.00291896	0.0299269	Up
ENSMUSG00000033149	Phldb2	1.04342	4.65e-07	1.75e-05	Up
ENSMUSG00000033174	Mgll	0.4304	0.00289582	0.0297281	Up
ENSMUSG00000033192	Lpcat2	0.863643	1.19e-06	4.06e-05	Up
ENSMUSG00000033278	Ptprm	0.806758	2.38e-09	1.4e-07	Up
ENSMUSG00000033306	Lpp	0.752836	8.47e-16	1.16e-13	Up
ENSMUSG00000033308	Dpyd	1.16023	1.05e-08	5.56e-07	Up
ENSMUSG00000033355	Rtp4	1.64857	7.76e-06	0.000209631	Up
ENSMUSG00000033361	Prrg3	0.511059	0.000207991	0.00346987	Up
ENSMUSG00000033400	Agl	0.295062	0.00115633	0.014217	Up
ENSMUSG00000033446	Lpar6	0.418204	6.32e-05	0.00127815	Up
ENSMUSG00000033450	Tagap	0.803792	4.8e-07	1.81e-05	Up
ENSMUSG00000033487	Fndc3a	0.457682	1.16e-07	4.96e-06	Up
ENSMUSG00000033508	Asprv1	0.756112	0.000829535	0.0109258	Up
ENSMUSG00000033538	Casp4	1.09399	8.68e-08	3.81e-06	Up
ENSMUSG00000033542	Arhgef5	0.770849	3.6e-15	4.7e-13	Up
ENSMUSG00000033565	Rbfox2	0.412153	0.00279501	0.0289502	Up
ENSMUSG00000033577	Myo6	0.794767	5.36e-08	2.47e-06	Up
ENSMUSG00000033721	Vav3	0.54603	2.52e-07	1.01e-05	Up
ENSMUSG00000033760	Rbm4b	0.433089	1.32e-06	4.48e-05	Up
ENSMUSG00000033769	Exoc6b	0.413702	1.73e-08	8.82e-07	Up
ENSMUSG00000033777	Tlr13	0.837719	0.00011153	0.00207667	Up
ENSMUSG00000033788	Dysf	0.929127	8.77e-06	0.000233456	Up
ENSMUSG00000033792	Atp7a	0.285979	0.00471556	0.0428077	Up
ENSMUSG00000033799	Fam208b	0.496405	1.17e-08	6.16e-07	Up
ENSMUSG00000033863	Klf9	1.01501	1.5e-11	1.27e-09	Up
ENSMUSG00000033880	Lgals3bp	0.834038	0.00119541	0.01461	Up
ENSMUSG00000033883	D3Ertd254e	0.379045	0.000430247	0.00634754	Up
ENSMUSG00000033943	Mga	0.349933	1.62e-08	8.31e-07	Up
ENSMUSG00000033981	Gria2	1.6295	1.71e-08	8.76e-07	Up
ENSMUSG00000034007	Scaper	0.736277	2.4e-10	1.68e-08	Up
ENSMUSG00000034009	Rxfp1	1.16527	2.38e-05	0.000553801	Up
ENSMUSG00000034028	Cd226	0.771277	1.01e-07	4.38e-06	Up
ENSMUSG00000034055	Phka1	0.624152	0.000697517	0.00942599	Up
ENSMUSG00000034101	Ctnnd1	0.829779	2.74e-06	8.5e-05	Up
ENSMUSG00000034152	Exoc3	0.293064	0.000128464	0.00233248	Up
ENSMUSG00000034160	Ogt	0.433743	1.08e-06	3.75e-05	Up
ENSMUSG00000034163	Zfc3h1	0.299564	1.14e-07	4.9e-06	Up
ENSMUSG00000034235	Usp54	0.578161	1.22e-06	4.17e-05	Up
ENSMUSG00000034252	Senp6	0.263799	0.000788321	0.010467	Up
ENSMUSG00000034258	Flvcr2	1.09483	1.97e-06	6.33e-05	Up
ENSMUSG00000034295	Fhod3	0.985544	0.000202729	0.00340358	Up
ENSMUSG00000034330	Plcg2	0.543906	0.00270623	0.0282575	Up
ENSMUSG00000034359	Skint2	1.05638	1.63e-05	0.000403465	Up
ENSMUSG00000034401	Spata6	0.293389	0.000978649	0.0124212	Up
ENSMUSG00000034422	Parp14	0.883065	5.86e-06	0.000165328	Up
ENSMUSG00000034435	Tmem30b	0.908469	6.72e-07	2.44e-05	Up
ENSMUSG00000034459	Ifit1	1.53732	1.04e-08	5.53e-07	Up
ENSMUSG00000034460	Six4	0.669064	0.00011712	0.00216477	Up
ENSMUSG00000034462	Pkd2	0.567537	0.00151239	0.0178359	Up
ENSMUSG00000034480	Diaph2	0.623267	1.13e-08	5.97e-07	Up
ENSMUSG00000034573	Ptpn13	1.02562	1.05e-16	1.57e-14	Up
ENSMUSG00000034574	Daam1	0.442948	0.000217577	0.00359949	Up
ENSMUSG00000034584	Exph5	0.856415	2.81e-05	0.000641141	Up
ENSMUSG00000034587	8430429K09Rik	0.749398	2.14e-05	0.000506241	Up
ENSMUSG00000034607	Pof1b	1.7728	5.92e-07	2.17e-05	Up
ENSMUSG00000034610	Zcchc11	0.333362	0.000155735	0.00274239	Up
ENSMUSG00000034640	Tiparp	0.724283	3.36e-08	1.62e-06	Up
ENSMUSG00000034647	Ankrd12	0.558795	2.35e-05	0.000548345	Up
ENSMUSG00000034663	Bmp2k	0.317379	0.000206577	0.00345147	Up
ENSMUSG00000034687	Fras1	0.69728	0.000798772	0.0105906	Up
ENSMUSG00000034707	Gns	0.487751	4.21e-07	1.6e-05	Up
ENSMUSG00000034708	Grn	0.826406	1.05e-11	9.16e-10	Up
ENSMUSG00000034714	Ttyh2	0.603398	0.00158774	0.0185627	Up
ENSMUSG00000034731	Dgkh	0.597937	6.55e-07	2.39e-05	Up
ENSMUSG00000034751	Mast4	0.615471	1.84e-05	0.00044622	Up
ENSMUSG00000034758	Tle6	0.550502	7.05e-05	0.00140138	Up
ENSMUSG00000034761	Map4k5	0.491344	1.15e-07	4.94e-06	Up
ENSMUSG00000034771	Tle2	0.56058	1.16e-07	4.95e-06	Up
ENSMUSG00000034785	Dio1	0.717478	0.00343126	0.0341385	Up
ENSMUSG00000034813	Grip1	0.576972	0.0029239	0.0299664	Up
ENSMUSG00000034825	Nrip3	1.67634	2.21e-07	8.93e-06	Up
ENSMUSG00000034833	Tespa1	0.510252	9.83e-08	4.28e-06	Up
ENSMUSG00000034842	Art3	0.862795	0.00114743	0.0141138	Up
ENSMUSG00000034858	Fam214a	0.399942	0.000219417	0.00362423	Up
ENSMUSG00000034898	Filip1	0.756821	0.00242609	0.0258104	Up
ENSMUSG00000034903	Cobll1	0.781417	5.41e-08	2.49e-06	Up
ENSMUSG00000034910	Pygo1	1.14371	8.24e-07	2.93e-05	Up
ENSMUSG00000034947	Tmem106a	0.705877	6.15e-05	0.00125228	Up
ENSMUSG00000034973	Dopey1	0.268303	0.000586345	0.00814177	Up
ENSMUSG00000034981	Parm1	0.921527	9.76e-10	6.11e-08	Up
ENSMUSG00000034987	Hrh2	0.904395	3.47e-05	0.000764319	Up
ENSMUSG00000035000	Dpp4	0.467021	0.00038084	0.00575324	Up
ENSMUSG00000035107	Dcbld2	0.552745	0.00106554	0.0132922	Up
ENSMUSG00000035133	Arhgap5	0.920101	3.32e-24	8.54e-22	Up
ENSMUSG00000035158	Mitf	0.784213	1.85e-05	0.000447468	Up
ENSMUSG00000035208	Slfn8	1.18163	3.49e-06	0.000105467	Up
ENSMUSG00000035236	Scai	0.402099	0.000135333	0.00243332	Up
ENSMUSG00000035245	Eogt	0.6457	1.53e-06	5.11e-05	Up
ENSMUSG00000035258	Abi3bp	0.681606	7.95e-06	0.000214299	Up
ENSMUSG00000035275	Raver2	0.715994	1.92e-06	6.19e-05	Up
ENSMUSG00000035311	Gnptab	0.351465	0.00288991	0.0296729	Up
ENSMUSG00000035356	Nfkbiz	0.485657	0.000534112	0.00756413	Up
ENSMUSG00000035373	Ccl7	1.62561	0.000315853	0.00489136	Up
ENSMUSG00000035448	Ccr3	0.717035	0.000445594	0.00651066	Up
ENSMUSG00000035451	Foxa1	1.20935	0.00211829	0.023215	Up
ENSMUSG00000035459	Stab2	0.892366	4.87e-05	0.00102299	Up
ENSMUSG00000035476	Tab3	0.417392	1.85e-05	0.000447503	Up
ENSMUSG00000035493	Tgfbi	0.584248	0.00312517	0.0316089	Up
ENSMUSG00000035498	Cdcp1	0.750323	6.54e-05	0.00131351	Up
ENSMUSG00000035509	Fbxl21	1.53075	0.00343906	0.0341977	Up
ENSMUSG00000035517	Tdrd7	0.721037	0.00153375	0.0180494	Up
ENSMUSG00000035597	Prpf39	0.280863	0.00326472	0.0327221	Up
ENSMUSG00000035649	Zcchc7	0.544778	5.34e-13	5.48e-11	Up
ENSMUSG00000035699	Slc51a	0.869705	0.00447516	0.0410639	Up
ENSMUSG00000035713	Usp35	0.348248	0.0050925	0.0453632	Up
ENSMUSG00000035725	Prkx	0.475362	0.000104233	0.00195524	Up
ENSMUSG00000035783	Acta2	0.607741	0.00482384	0.0435432	Up
ENSMUSG00000035840	Lysmd3	0.414618	0.000895922	0.0115542	Up
ENSMUSG00000035847	Ids	0.5325	4.38e-08	2.05e-06	Up
ENSMUSG00000035864	Syt1	0.944159	0.000813887	0.0107541	Up
ENSMUSG00000035916	Ptprq	0.905378	0.00111631	0.0137953	Up
ENSMUSG00000035933	Cog5	0.331101	7.33e-09	4e-07	Up
ENSMUSG00000035934	Pknox2	1.1064	0.000200861	0.00337937	Up
ENSMUSG00000035954	Dock4	0.726142	1.43e-09	8.79e-08	Up
ENSMUSG00000036002	Fam214b	0.636475	6.28e-05	0.00127231	Up
ENSMUSG00000036006	Ripor2	0.362472	1.67e-05	0.000412147	Up
ENSMUSG00000036036	Zfp57	1.59858	0.000203058	0.00340703	Up
ENSMUSG00000036053	Fmnl2	0.387809	0.000116785	0.00216001	Up
ENSMUSG00000036103	Colec12	0.670382	0.000277223	0.00438366	Up
ENSMUSG00000036249	Rbm43	0.52318	7.95e-05	0.0015537	Up
ENSMUSG00000036257	Pnpla8	0.408941	0.00074766	0.0100037	Up
ENSMUSG00000036295	Lrrn3	0.656228	0.000837532	0.010996	Up
ENSMUSG00000036298	Slc2a13	0.848133	0.000701936	0.00946957	Up
ENSMUSG00000036306	Lzts1	0.361405	0.00423261	0.0397906	Up
ENSMUSG00000036334	Igsf10	0.837045	3.16e-05	0.000706277	Up
ENSMUSG00000036353	P2ry12	1.19061	2.88e-08	1.41e-06	Up
ENSMUSG00000036362	P2ry13	1.12245	7.93e-12	6.97e-10	Up
ENSMUSG00000036377	C530008M17Rik	0.494498	0.00492183	0.0442253	Up
ENSMUSG00000036402	Gng12	0.575961	1.1e-05	0.000286199	Up
ENSMUSG00000036446	Lum	0.617845	0.00161367	0.0188	Up
ENSMUSG00000036466	Megf11	0.407276	0.000191634	0.00325871	Up
ENSMUSG00000036469	43160	1.04154	5.91e-08	2.7e-06	Up
ENSMUSG00000036478	Btg1	0.298457	0.000808015	0.010685	Up
ENSMUSG00000036499	Eea1	0.648629	1.01e-06	3.52e-05	Up
ENSMUSG00000036502	Tmem255a	0.740546	0.00138586	0.0165727	Up
ENSMUSG00000036503	Rnf13	0.601831	3.62e-05	0.000792061	Up
ENSMUSG00000036528	Ppfibp2	0.670683	1.34e-06	4.53e-05	Up
ENSMUSG00000036534	Slc38a7	0.438968	0.00265989	0.0278365	Up
ENSMUSG00000036585	Fgf1	0.686245	3.28e-05	0.00072905	Up
ENSMUSG00000036594	H2-Aa	0.421335	0.00124143	0.0150763	Up
ENSMUSG00000036606	Plxnb2	0.556933	0.00085143	0.0111502	Up
ENSMUSG00000036617	Etl4	0.755796	3.55e-09	2.03e-07	Up
ENSMUSG00000036641	Ccdc148	0.863598	4.95e-05	0.00103645	Up
ENSMUSG00000036661	Dennd3	0.517737	0.0037854	0.0368622	Up
ENSMUSG00000036667	Tcaf1	0.765025	0.000198807	0.00335898	Up
ENSMUSG00000036676	Tmtc3	0.565164	0.00011652	0.002158	Up
ENSMUSG00000036769	Wdr44	0.268096	0.00194748	0.0216336	Up
ENSMUSG00000036782	Klhl13	1.19113	0.00216889	0.0235693	Up
ENSMUSG00000036792	Mbd5	0.419848	1.19e-05	0.000305716	Up
ENSMUSG00000036815	Dpp10	1.04887	0.000278498	0.00439881	Up
ENSMUSG00000036834	Plch1	0.99557	0.00419708	0.0395031	Up
ENSMUSG00000036879	Phkb	0.291599	0.00463981	0.0422117	Up
ENSMUSG00000036885	Arhgef26	0.714363	1.15e-05	0.000297453	Up
ENSMUSG00000036887	C1qa	0.623318	1.7e-05	0.000417197	Up
ENSMUSG00000036890	Gtdc1	0.478111	8.83e-06	0.000234774	Up
ENSMUSG00000036896	C1qc	0.949367	1.96e-10	1.4e-08	Up
ENSMUSG00000036898	Zfp157	0.507534	0.000701726	0.00946903	Up
ENSMUSG00000036904	Fzd8	0.666163	4.46e-05	0.000950838	Up
ENSMUSG00000036905	C1qb	0.880089	9.81e-11	7.42e-09	Up
ENSMUSG00000036908	Unc93b1	0.708648	5.44e-05	0.00112269	Up
ENSMUSG00000036916	Zfp280c	0.464204	0.000941545	0.0120404	Up
ENSMUSG00000036923	Stox1	0.95048	1.73e-06	5.67e-05	Up
ENSMUSG00000036943	Rab8b	0.322726	6.23e-05	0.00126322	Up
ENSMUSG00000036944	Tmem71	0.588296	1.86e-06	6.04e-05	Up
ENSMUSG00000036960	Clca2	1.33704	5.57e-08	2.56e-06	Up
ENSMUSG00000037003	Tns2	0.69869	2.44e-10	1.7e-08	Up
ENSMUSG00000037086	Prr32	0.908636	0.00061586	0.00847315	Up
ENSMUSG00000037159	Wee2	1.63066	0.00278849	0.028899	Up
ENSMUSG00000037202	Prf1	0.647159	0.000576899	0.00803877	Up
ENSMUSG00000037224	Zfyve28	0.79307	6.93e-08	3.11e-06	Up
ENSMUSG00000037234	Hook3	0.327658	2.11e-05	0.00049994	Up
ENSMUSG00000037259	Dzank1	0.69891	0.00363957	0.0357684	Up
ENSMUSG00000037270	4932438A13Rik	0.483535	3.81e-08	1.81e-06	Up
ENSMUSG00000037355	Uvssa	0.492617	1.51e-05	0.000376491	Up
ENSMUSG00000037370	Enpp1	1.11057	2.31e-05	0.000540081	Up
ENSMUSG00000037406	Htra4	1.47702	0.000133355	0.00240556	Up
ENSMUSG00000037411	Serpine1	0.957856	0.000133224	0.00240396	Up
ENSMUSG00000037416	Dmxl1	0.382327	0.00128513	0.0155356	Up
ENSMUSG00000037419	Endod1	0.533256	3.6e-05	0.000789087	Up
ENSMUSG00000037434	Slc30a1	0.414374	0.00285394	0.0294263	Up
ENSMUSG00000037475	Thoc2	0.413775	0.000128672	0.00233474	Up
ENSMUSG00000037533	Rapgef6	0.37351	1.37e-05	0.000346643	Up
ENSMUSG00000037605	Adgrl3	0.854525	0.00037606	0.00569188	Up
ENSMUSG00000037621	Atoh8	1.04323	0.00217539	0.023603	Up
ENSMUSG00000037624	Kcnk2	0.8178	7.34e-07	2.63e-05	Up
ENSMUSG00000037646	Vps13b	0.337886	6.04e-10	3.9e-08	Up
ENSMUSG00000037661	Gpr160	0.660352	0.000937904	0.0120001	Up
ENSMUSG00000037674	Rfx7	0.321159	0.00095632	0.0121845	Up
ENSMUSG00000037685	Atp8a1	0.335076	0.00015662	0.00275531	Up
ENSMUSG00000037709	Fam13a	0.944891	2.2e-07	8.9e-06	Up
ENSMUSG00000037712	Fermt2	0.854915	1.5e-07	6.21e-06	Up
ENSMUSG00000037731	Themis2	0.57524	0.00485841	0.0437698	Up
ENSMUSG00000037736	Limch1	0.918454	4.69e-06	0.0001363	Up
ENSMUSG00000037815	Ctnna1	0.390635	0.000113465	0.00210845	Up
ENSMUSG00000037820	Tgm2	1.00312	3e-06	9.24e-05	Up
ENSMUSG00000037822	Smim14	0.391516	0.000200415	0.00337606	Up
ENSMUSG00000037833	Sh2d4b	0.657429	0.00429045	0.0401531	Up
ENSMUSG00000037849	Ifi206	1.88071	2.64e-09	1.54e-07	Up
ENSMUSG00000037860	Aim2	0.636841	0.00021414	0.00355641	Up
ENSMUSG00000037876	Jmjd1c	0.402093	1.29e-07	5.45e-06	Up
ENSMUSG00000037902	Sirpa	0.742487	1.42e-08	7.38e-07	Up
ENSMUSG00000037921	Ddx60	1.20915	1.84e-05	0.000445919	Up
ENSMUSG00000037922	Bank1	1.0254	3.54e-08	1.69e-06	Up
ENSMUSG00000037940	Inpp4b	0.710938	1.91e-08	9.68e-07	Up
ENSMUSG00000037994	Slc9b2	1.34981	0.00195403	0.0216932	Up
ENSMUSG00000037999	Arap2	0.965959	1.89e-41	1.91e-38	Up
ENSMUSG00000038039	Gcc2	0.408241	0.000244858	0.00396337	Up
ENSMUSG00000038045	Sult6b1	1.15775	4.81e-05	0.00101253	Up
ENSMUSG00000038068	Rnf144b	0.56689	0.00364621	0.0358211	Up
ENSMUSG00000038143	Stox2	0.750684	4.7e-10	3.1e-08	Up
ENSMUSG00000038147	Cd84	0.44548	2.09e-05	0.000495199	Up
ENSMUSG00000038151	Prdm1	0.942073	0.000105902	0.00198334	Up
ENSMUSG00000038170	Pde4dip	0.302546	1.76e-05	0.000429439	Up
ENSMUSG00000038172	Ttc39b	0.576256	0.00366589	0.0359629	Up
ENSMUSG00000038175	Mylip	0.594248	7.01e-12	6.21e-10	Up
ENSMUSG00000038179	Slamf7	0.90992	8.75e-11	6.63e-09	Up
ENSMUSG00000038242	Aox4	1.25587	0.00368375	0.0360622	Up
ENSMUSG00000038296	Galnt18	0.744033	2.08e-05	0.000494806	Up
ENSMUSG00000038301	Snx10	0.475608	8.49e-05	0.00164315	Up
ENSMUSG00000038304	Cd160	0.800333	0.000657929	0.00895696	Up
ENSMUSG00000038305	Spats2l	0.589771	0.000278462	0.00439881	Up
ENSMUSG00000038369	Ncoa6	0.313708	0.00370784	0.0362595	Up
ENSMUSG00000038371	Sbf2	0.867244	2.37e-11	1.97e-09	Up
ENSMUSG00000038375	Trp53inp2	0.443073	0.000919411	0.0118037	Up
ENSMUSG00000038393	Txnip	0.711604	3.5e-12	3.22e-10	Up
ENSMUSG00000038418	Egr1	0.439652	0.0024146	0.0257256	Up
ENSMUSG00000038421	Fcrla	1.0607	1.56e-05	0.000389694	Up
ENSMUSG00000038473	Nos1ap	0.908706	0.000356757	0.00545778	Up
ENSMUSG00000038540	Tmc3	0.705956	0.00566273	0.0493916	Up
ENSMUSG00000038570	Saxo2	1.47382	0.00113898	0.0140316	Up
ENSMUSG00000038583	Pln	1.93845	0.000214226	0.00355677	Up
ENSMUSG00000038608	Dock10	0.533073	8.74e-08	3.83e-06	Up
ENSMUSG00000038642	Ctss	0.532617	0.00227727	0.0245024	Up
ENSMUSG00000038648	Creb3l2	0.361686	0.000225681	0.00371009	Up
ENSMUSG00000038665	Dgki	1.09078	0.000804401	0.0106499	Up
ENSMUSG00000038668	Lpar1	0.880547	6.14e-14	7.05e-12	Up
ENSMUSG00000038679	Trps1	0.289401	0.00211981	0.023227	Up
ENSMUSG00000038718	Pbx3	0.69344	0.000615199	0.00846616	Up
ENSMUSG00000038774	Ascc3	0.478682	5.56e-06	0.000157621	Up
ENSMUSG00000038776	Ephx1	0.672085	3.99e-06	0.000118631	Up
ENSMUSG00000038784	Cnot4	0.340632	0.00297124	0.0303619	Up
ENSMUSG00000038843	Gcnt1	0.752425	5.77e-08	2.65e-06	Up
ENSMUSG00000038872	Zfhx3	0.616894	9.92e-06	0.000260551	Up
ENSMUSG00000038879	Nipal2	1.46883	2.14e-12	2.05e-10	Up
ENSMUSG00000038884	A230050P20Rik	0.56883	0.000799209	0.0105938	Up
ENSMUSG00000038903	Ccdc68	1.1768	0.000121592	0.00223034	Up
ENSMUSG00000039005	Tlr4	0.76402	1.58e-05	0.000393743	Up
ENSMUSG00000039043	Arpin	0.536023	0.00453051	0.0414552	Up
ENSMUSG00000039062	Anpep	0.586976	0.000358167	0.00547483	Up
ENSMUSG00000039089	L3mbtl3	0.425625	0.00018751	0.00319735	Up
ENSMUSG00000039109	F13a1	0.647199	4.06e-10	2.71e-08	Up
ENSMUSG00000039115	Itga9	0.944738	1.85e-09	1.11e-07	Up
ENSMUSG00000039116	Adgrg6	0.956069	0.000182551	0.00311859	Up
ENSMUSG00000039153	Runx2	0.534492	0.00257562	0.0271235	Up
ENSMUSG00000039166	Akap7	0.760211	0.000287826	0.00451402	Up
ENSMUSG00000039193	Nlrc4	1.10591	3.56e-06	0.000107318	Up
ENSMUSG00000039217	Il18	1.58494	1.28e-06	4.36e-05	Up
ENSMUSG00000039219	Arid4b	0.303805	0.00109189	0.0135448	Up
ENSMUSG00000039234	Sec24d	0.513409	0.00182891	0.0206261	Up
ENSMUSG00000039236	Isg20	0.539133	8.97e-05	0.00172057	Up
ENSMUSG00000039286	Fndc3b	0.650014	1.37e-08	7.16e-07	Up
ENSMUSG00000039304	Tnfsf10	0.632801	0.000399675	0.00598079	Up
ENSMUSG00000039361	Picalm	0.315968	3.83e-05	0.000832664	Up
ENSMUSG00000039428	Tmem135	0.32507	0.000391863	0.00587974	Up
ENSMUSG00000039478	Micu3	0.617306	0.000586155	0.00814117	Up
ENSMUSG00000039497	Dse	0.730174	7.49e-06	0.000203741	Up
ENSMUSG00000039519	Cyp7b1	0.962253	0.000343594	0.00527677	Up
ENSMUSG00000039529	Atp8b1	0.782371	0.00328342	0.0328917	Up
ENSMUSG00000039531	Zufsp	0.670237	2.17e-10	1.53e-08	Up
ENSMUSG00000039578	Ccser1	0.644748	0.000201975	0.00339297	Up
ENSMUSG00000039585	Myo9a	0.617747	9.47e-09	5.06e-07	Up
ENSMUSG00000039607	Rbms3	0.726832	9.24e-07	3.26e-05	Up
ENSMUSG00000039616	Mocos	0.717259	0.00163884	0.0190638	Up
ENSMUSG00000039620	6430573F11Rik	1.7347	0.000892156	0.0115204	Up
ENSMUSG00000039701	Usp53	0.369254	0.00193804	0.021559	Up
ENSMUSG00000039735	Fnbp1l	0.496921	0.00101197	0.0127762	Up
ENSMUSG00000039782	Cpeb2	0.54998	4.31e-05	0.000924408	Up
ENSMUSG00000039813	Tbc1d2	0.78495	0.00119652	0.0146204	Up
ENSMUSG00000039831	Arhgap29	0.556792	0.00546485	0.0480247	Up
ENSMUSG00000039899	Fgl2	1.02675	4.47e-06	0.000130356	Up
ENSMUSG00000039934	Gsap	0.602798	0.00168882	0.0195265	Up
ENSMUSG00000039943	Plcb4	0.477739	0.00233132	0.0249726	Up
ENSMUSG00000039953	Clstn1	0.692942	9.25e-07	3.26e-05	Up
ENSMUSG00000039958	Etfbkmt	0.503817	0.00160597	0.0187364	Up
ENSMUSG00000039959	Hip1	0.444103	0.003756	0.0366273	Up
ENSMUSG00000039967	Zfp292	0.446241	0.000224064	0.0036903	Up
ENSMUSG00000039982	Dtx4	0.65935	0.00212479	0.0232612	Up
ENSMUSG00000039997	Ifi203	1.46264	4.8e-11	3.82e-09	Up
ENSMUSG00000040022	Rab11fip2	0.410899	0.00244089	0.025946	Up
ENSMUSG00000040026	Saa3	0.788844	0.0039833	0.0378655	Up
ENSMUSG00000040061	Plcb2	0.336108	9.19e-05	0.00175799	Up
ENSMUSG00000040093	Bmf	1.00512	1.45e-23	3.57e-21	Up
ENSMUSG00000040111	Gramd1b	0.476327	0.00374892	0.0365775	Up
ENSMUSG00000040123	Zmym5	0.306965	0.00569166	0.0495627	Up
ENSMUSG00000040152	Thbs1	1.0469	0.000235278	0.00383402	Up
ENSMUSG00000040181	Fmo1	0.451465	0.00110047	0.0136207	Up
ENSMUSG00000040183	Ankrd6	0.387581	0.000359985	0.00549611	Up
ENSMUSG00000040197	Cd209e	0.846904	0.00309208	0.0313599	Up
ENSMUSG00000040229	Gpr34	0.767209	0.00112813	0.0139196	Up
ENSMUSG00000040249	Lrp1	0.51884	9.14e-05	0.00174799	Up
ENSMUSG00000040253	Gbp7	0.795264	5.86e-06	0.000165295	Up
ENSMUSG00000040265	Dnm3	0.829496	3.03e-05	0.000682019	Up
ENSMUSG00000040268	Plekha1	0.453627	5.44e-05	0.0011224	Up
ENSMUSG00000040289	Hey1	0.683683	0.000444578	0.00650193	Up
ENSMUSG00000040296	Ddx58	1.0408	2.84e-06	8.8e-05	Up
ENSMUSG00000040297	Suco	0.329866	4.98e-05	0.00104064	Up
ENSMUSG00000040328	Olfr56	1.22921	0.000206159	0.00344656	Up
ENSMUSG00000040329	Il7	0.833133	3.47e-05	0.000765114	Up
ENSMUSG00000040359	Ufl1	0.38791	0.000580401	0.00807743	Up
ENSMUSG00000040372	Gpr63	1.1955	0.000405554	0.00604654	Up
ENSMUSG00000040407	Akap9	0.411778	0.000225733	0.00371009	Up
ENSMUSG00000040433	Zbtb38	0.549096	1.03e-10	7.72e-09	Up
ENSMUSG00000040441	Slc26a10	0.472737	0.00332276	0.0332318	Up
ENSMUSG00000040459	Arglu1	0.315059	0.000275101	0.00436005	Up
ENSMUSG00000040483	Xaf1	1.27343	0.000252745	0.00406495	Up
ENSMUSG00000040520	Manea	0.624811	3.2e-07	1.25e-05	Up
ENSMUSG00000040522	Tlr8	1.45953	7.65e-09	4.15e-07	Up
ENSMUSG00000040525	Cblc	1.58947	0.000449685	0.00656451	Up
ENSMUSG00000040537	Adam22	0.538602	0.00171203	0.0197496	Up
ENSMUSG00000040552	C3ar1	1.07801	1.85e-09	1.11e-07	Up
ENSMUSG00000040562	Gstm2	0.947911	0.000177101	0.00304519	Up
ENSMUSG00000040563	Plppr2	1.00049	0.00286253	0.029479	Up
ENSMUSG00000040564	Apoc1	1.13663	0.000151118	0.00267553	Up
ENSMUSG00000040565	Btaf1	0.590316	2.35e-05	0.000547572	Up
ENSMUSG00000040584	Abcb1a	0.997123	0.000913234	0.0117352	Up
ENSMUSG00000040596	Pogk	0.319994	0.00244952	0.0260227	Up
ENSMUSG00000040606	Kazn	0.404003	0.00533082	0.0470406	Up
ENSMUSG00000040613	Apobec1	0.779528	2.17e-08	1.09e-06	Up
ENSMUSG00000040624	Plekhg1	0.928152	1.54e-07	6.38e-06	Up
ENSMUSG00000040649	Rimklb	0.764632	0.0053497	0.0471848	Up
ENSMUSG00000040663	Clcf1	0.529089	0.000912303	0.0117266	Up
ENSMUSG00000040710	St8sia4	0.523917	1.75e-05	0.0004273	Up
ENSMUSG00000040711	Sh3pxd2b	0.528515	2.54e-05	0.000585157	Up
ENSMUSG00000040713	Creg1	0.476203	0.000366942	0.00558895	Up
ENSMUSG00000040722	Scamp5	0.873918	0.000282961	0.0044503	Up
ENSMUSG00000040728	Esrp1	0.558922	0.000979712	0.0124311	Up
ENSMUSG00000040729	Cep126	0.81989	4.4e-05	0.000939124	Up
ENSMUSG00000040747	Cd53	0.962252	9.85e-11	7.43e-09	Up
ENSMUSG00000040782	Cop1	0.29526	0.000116025	0.00215098	Up
ENSMUSG00000040785	Ttc3	0.278835	0.000251146	0.00404157	Up
ENSMUSG00000040836	Gpr161	0.753392	0.000975298	0.0123921	Up
ENSMUSG00000040838	Gm11639	1.54396	7.47e-05	0.00147046	Up
ENSMUSG00000040852	Plekhh2	0.995338	0.000761693	0.0101719	Up
ENSMUSG00000040855	Reps2	1.158	1.32e-07	5.57e-06	Up
ENSMUSG00000040875	Osbpl10	0.777682	0.0006673	0.00905072	Up
ENSMUSG00000040899	Ccr6	0.852448	0.00385268	0.0369489	Up
ENSMUSG00000040929	Rfx3	0.315433	2.17e-05	0.000511786	Up
ENSMUSG00000040943	Tet2	0.449623	8.1e-11	6.18e-09	Up
ENSMUSG00000041046	Ramp3	1.34455	0.00246496	0.0261627	Up
ENSMUSG00000041058	Wwp1	0.617795	2.71e-16	3.91e-14	Up
ENSMUSG00000041115	Iqsec2	0.590894	0.000383165	0.00577736	Up
ENSMUSG00000041189	Chrnb1	0.531326	0.00129282	0.0156238	Up
ENSMUSG00000041235	Chd7	0.654628	0.00242008	0.0257691	Up
ENSMUSG00000041236	Vps41	0.447611	0.000109519	0.00204333	Up
ENSMUSG00000041268	Dmxl2	0.732542	5.58e-08	2.56e-06	Up
ENSMUSG00000041272	Tox	0.668258	8.81e-23	2.04e-20	Up
ENSMUSG00000041308	Sntb2	0.512504	9.51e-05	0.00181255	Up
ENSMUSG00000041362	Shtn1	0.861191	1.87e-09	1.12e-07	Up
ENSMUSG00000041390	Mdfic	0.510645	0.00105996	0.0132314	Up
ENSMUSG00000041417	Pik3r1	0.352729	1.38e-08	7.19e-07	Up
ENSMUSG00000041440	Gk5	0.477085	0.00322237	0.0323854	Up
ENSMUSG00000041481	Serpina3g	0.791158	9.81e-05	0.00186253	Up
ENSMUSG00000041488	Stx3	0.573484	0.00442896	0.0408835	Up
ENSMUSG00000041570	Camsap2	0.413805	7.8e-08	3.46e-06	Up
ENSMUSG00000041577	Prelp	0.951376	3.98e-11	3.19e-09	Up
ENSMUSG00000041592	Sdk2	0.854908	0.000150357	0.00266545	Up
ENSMUSG00000041624	Gucy1a2	0.860998	1.48e-05	0.00037035	Up
ENSMUSG00000041660	Bbox1	1.27752	0.000299793	0.00467791	Up
ENSMUSG00000041673	Lrrc18	0.736699	0.00320275	0.0322115	Up
ENSMUSG00000041685	Fcho2	0.640845	5.68e-09	3.16e-07	Up
ENSMUSG00000041688	Amot	0.849164	5.91e-11	4.64e-09	Up
ENSMUSG00000041695	Kcnj2	0.723229	0.00275971	0.028659	Up
ENSMUSG00000041757	Plekha6	0.684743	0.000725947	0.00975081	Up
ENSMUSG00000041762	Gpr155	0.669325	0.000462891	0.00672016	Up
ENSMUSG00000041775	Mapk1ip1	0.466117	1.67e-05	0.000411079	Up
ENSMUSG00000041797	Abca9	0.62696	5e-05	0.00104435	Up
ENSMUSG00000041827	Oasl1	1.15627	7.1e-05	0.0014106	Up
ENSMUSG00000041849	Card6	0.584883	0.00112271	0.0138682	Up
ENSMUSG00000041886	Macc1	1.25139	0.00052181	0.00740882	Up
ENSMUSG00000041895	Wipi1	0.729866	0.00100864	0.0127457	Up
ENSMUSG00000041984	Rptn	1.28057	0.000952958	0.01215	Up
ENSMUSG00000042042	Csgalnact2	0.655716	7.12e-06	0.000195274	Up
ENSMUSG00000042046	Dstyk	0.336285	0.00094681	0.0120938	Up
ENSMUSG00000042063	Zfp386	0.452657	1.71e-06	5.62e-05	Up
ENSMUSG00000042082	Arsb	0.64032	0.00101921	0.0128413	Up
ENSMUSG00000042105	Inpp5f	0.334208	0.00409596	0.0387374	Up
ENSMUSG00000042121	Ssh1	0.566733	3.02e-05	0.000681199	Up
ENSMUSG00000042129	Rassf4	0.607751	1.95e-05	0.000466274	Up
ENSMUSG00000042156	Dzip1	0.28873	0.00101871	0.0128385	Up
ENSMUSG00000042190	Cmklr1	0.838466	1.41e-07	5.9e-06	Up
ENSMUSG00000042228	Lyn	1.1022	3.82e-14	4.49e-12	Up
ENSMUSG00000042229	Rabif	0.33798	0.000386305	0.00581365	Up
ENSMUSG00000042249	Grk3	0.784009	8.14e-11	6.2e-09	Up
ENSMUSG00000042258	Isl1	1.15161	3.87e-08	1.83e-06	Up
ENSMUSG00000042284	Itga1	0.92737	1.79e-10	1.29e-08	Up
ENSMUSG00000042302	Ehbp1	0.574801	4e-05	0.00086621	Up
ENSMUSG00000042359	Osbpl6	1.01612	7.89e-09	4.27e-07	Up
ENSMUSG00000042363	Lgalsl	0.750429	0.000419928	0.00622177	Up
ENSMUSG00000042408	Zmym6	0.444312	0.00113071	0.0139452	Up
ENSMUSG00000042426	Dhx29	0.298398	0.00284611	0.0293699	Up
ENSMUSG00000042428	Mgat3	0.592177	3.1e-06	9.48e-05	Up
ENSMUSG00000042453	Reln	0.921152	0.00151521	0.0178654	Up
ENSMUSG00000042474	Fcmr	1.56861	0.000150336	0.00266545	Up
ENSMUSG00000042476	Abcb4	0.743075	0.00193918	0.021563	Up
ENSMUSG00000042500	Ago4	1.43109	2.39e-11	1.97e-09	Up
ENSMUSG00000042579	4632404H12Rik	0.4486	0.000163458	0.00285933	Up
ENSMUSG00000042599	Kdm7a	0.647308	5.55e-17	8.48e-15	Up
ENSMUSG00000042659	Arrdc4	0.727739	5.66e-05	0.00116082	Up
ENSMUSG00000042662	Dusp15	0.78422	0.000132851	0.00239802	Up
ENSMUSG00000042726	Trafd1	0.295457	0.00459289	0.0418741	Up
ENSMUSG00000042742	Bmt2	0.322737	0.0028659	0.029481	Up
ENSMUSG00000042784	Muc1	0.693364	0.00465652	0.0423334	Up
ENSMUSG00000042807	Hecw2	0.736199	0.0019041	0.0212495	Up
ENSMUSG00000042851	Zc3h6	0.517131	0.00119781	0.014633	Up
ENSMUSG00000042942	Greb1l	0.544544	0.000247702	0.00400392	Up
ENSMUSG00000043003	Rasef	0.750337	0.000591423	0.00820817	Up
ENSMUSG00000043004	Gng2	1.00577	2.36e-10	1.66e-08	Up
ENSMUSG00000043079	Synpo	0.415057	0.00338549	0.0337618	Up
ENSMUSG00000043154	Ppp2r3a	0.393032	1.55e-08	8.02e-07	Up
ENSMUSG00000043241	Upf2	0.313304	0.00263216	0.0276193	Up
ENSMUSG00000043263	Ifi209	1.20912	7.85e-16	1.08e-13	Up
ENSMUSG00000043300	B3galnt1	1.31711	0.00167431	0.019391	Up
ENSMUSG00000043336	Filip1l	0.786493	3.55e-07	1.37e-05	Up
ENSMUSG00000043487	Acot6	1.07936	0.0037208	0.0363619	Up
ENSMUSG00000043505	Gimap5	0.440176	0.00084847	0.0111193	Up
ENSMUSG00000043518	Rai2	1.53315	5.38e-06	0.000153518	Up
ENSMUSG00000043542	Zc2hc1a	0.952216	3.67e-09	2.09e-07	Up
ENSMUSG00000043557	Mdga1	0.581177	3.06e-06	9.38e-05	Up
ENSMUSG00000043629	1700019D03Rik	1.0003	2.8e-08	1.37e-06	Up
ENSMUSG00000043740	B430306N03Rik	1.05871	1.82e-06	5.92e-05	Up
ENSMUSG00000043753	Dmrta1	1.01982	0.00405833	0.0384471	Up
ENSMUSG00000043832	Clec4a3	1.08008	2.07e-05	0.000492389	Up
ENSMUSG00000043909	Trp53bp1	0.328088	4.08e-06	0.000121016	Up
ENSMUSG00000043940	Wdfy3	0.893486	1.52e-20	2.97e-18	Up
ENSMUSG00000043943	Naalad2	0.701493	0.00177331	0.0203212	Up
ENSMUSG00000043953	Ccrl2	1.14196	0.000120767	0.00221741	Up
ENSMUSG00000044042	Fmn1	0.807787	3.04e-06	9.34e-05	Up
ENSMUSG00000044156	Hepacam2	1.40412	1.27e-07	5.36e-06	Up
ENSMUSG00000044165	Bcl2l15	1.99484	1.53e-07	6.34e-06	Up
ENSMUSG00000044167	Foxo1	0.326115	0.00449812	0.0412132	Up
ENSMUSG00000044229	Nxpe4	0.797963	0.00342321	0.0340767	Up
ENSMUSG00000044250	Pced1b	0.619127	0.00422426	0.0397341	Up
ENSMUSG00000044337	Ackr3	0.8938	0.00148506	0.0175471	Up
ENSMUSG00000044338	Aplnr	0.891085	0.00436715	0.0406645	Up
ENSMUSG00000044349	Snhg11	1.29582	1.28e-29	5.38e-27	Up
ENSMUSG00000044350	Lacc1	0.933257	5.52e-05	0.00113587	Up
ENSMUSG00000044393	Dsg2	0.506743	0.00560514	0.0490169	Up
ENSMUSG00000044461	Shisa2	1.03069	1.26e-07	5.35e-06	Up
ENSMUSG00000044471	Lncpint	0.438479	0.00152268	0.0179382	Up
ENSMUSG00000044501	Zfp758	0.531108	1.19e-05	0.000305716	Up
ENSMUSG00000044522	A730020M07Rik	1.39616	0.00554846	0.0486439	Up
ENSMUSG00000044583	Tlr7	1.02315	4e-06	0.000118749	Up
ENSMUSG00000044694	2010007H06Rik	1.39189	1.1e-07	4.75e-06	Up
ENSMUSG00000044708	Kcnj10	0.731222	0.000937956	0.0120001	Up
ENSMUSG00000044734	Serpinb1a	0.747931	1.28e-05	0.000325406	Up
ENSMUSG00000044748	Defb1	1.17506	0.00295658	0.0302344	Up
ENSMUSG00000044827	Tlr1	1.16997	2.93e-05	0.000663215	Up
ENSMUSG00000044921	Rassf9	0.846455	0.00165599	0.019219	Up
ENSMUSG00000044949	Ubtd2	0.530062	0.00345967	0.0343841	Up
ENSMUSG00000045078	Rnf216	0.315479	0.00238313	0.0254342	Up
ENSMUSG00000045092	S1pr1	0.619778	0.00465133	0.0423026	Up
ENSMUSG00000045094	Arhgef37	0.620853	0.00522134	0.0462363	Up
ENSMUSG00000045095	Magi1	0.501358	0.000477355	0.00690305	Up
ENSMUSG00000045103	Dmd	0.85512	4.72e-05	0.000997932	Up
ENSMUSG00000045180	Shroom2	0.683395	0.000168138	0.00292002	Up
ENSMUSG00000045215	Asxl3	1.26873	1.72e-07	7.07e-06	Up
ENSMUSG00000045322	Tlr9	1.11256	0.00023027	0.00376903	Up
ENSMUSG00000045326	Fndc7	0.678144	0.00103894	0.0130303	Up
ENSMUSG00000045362	Tnfrsf26	0.470671	0.0047257	0.0428596	Up
ENSMUSG00000045392	Olfr1033	2.37693	1.24e-28	4.7e-26	Up
ENSMUSG00000045410	Akr1e1	0.797412	1.34e-05	0.000338669	Up
ENSMUSG00000045441	Gprin3	0.898454	3.1e-09	1.78e-07	Up
ENSMUSG00000045636	Mtus1	0.872559	4.2e-07	1.6e-05	Up
ENSMUSG00000045658	Pid1	0.656867	0.00319584	0.0321595	Up
ENSMUSG00000045827	Serpinb9	0.848806	2.47e-07	9.9e-06	Up
ENSMUSG00000045871	Slitrk6	1.6223	3.02e-05	0.000681557	Up
ENSMUSG00000045875	Adra1a	1.02259	6.31e-05	0.00127709	Up
ENSMUSG00000045877	4933415A04Rik	0.852809	0.00281985	0.0291477	Up
ENSMUSG00000046006	Gapt	1.04029	0.000595869	0.00825336	Up
ENSMUSG00000046080	Clec9a	0.815716	4.18e-05	0.000899579	Up
ENSMUSG00000046157	Tmem229b	0.32824	0.000649104	0.00886895	Up
ENSMUSG00000046169	Adamts6	0.716264	8.35e-12	7.32e-10	Up
ENSMUSG00000046230	Vps13a	0.435468	1.95e-06	6.27e-05	Up
ENSMUSG00000046245	Pilra	0.828754	0.00114935	0.0141343	Up
ENSMUSG00000046314	Stxbp6	0.919132	1.13e-07	4.87e-06	Up
ENSMUSG00000046324	Ermp1	0.317262	3.08e-05	0.000691455	Up
ENSMUSG00000046378	Asphd1	1.23852	0.000117769	0.00217505	Up
ENSMUSG00000046402	Rbp1	0.602617	0.00439579	0.040849	Up
ENSMUSG00000046456	Tmem150b	1.00959	0.000657397	0.00895478	Up
ENSMUSG00000046460	Sh2d7	1.72198	0.00040053	0.00598874	Up
ENSMUSG00000046523	Kctd4	0.670841	2.8e-06	8.69e-05	Up
ENSMUSG00000046532	Ar	0.717852	1.33e-11	1.14e-09	Up
ENSMUSG00000046618	Olfml2a	0.925493	8.57e-08	3.77e-06	Up
ENSMUSG00000046688	Tifa	0.797526	7.08e-07	2.55e-05	Up
ENSMUSG00000046743	Fat4	0.761163	4.27e-07	1.62e-05	Up
ENSMUSG00000046753	Ccdc66	0.370703	0.00444582	0.0409096	Up
ENSMUSG00000046805	Mpeg1	0.845097	2.57e-12	2.44e-10	Up
ENSMUSG00000046879	Irgm1	0.937306	4.08e-07	1.56e-05	Up
ENSMUSG00000046949	Nqo2	0.415694	0.00388492	0.0370998	Up
ENSMUSG00000046952	Gm5815	0.303812	0.00426739	0.0400042	Up
ENSMUSG00000047022	Mipol1	0.485284	0.00231691	0.0248518	Up
ENSMUSG00000047141	Zfp654	0.336111	0.00140004	0.016717	Up
ENSMUSG00000047146	Tet1	0.387734	0.00111485	0.0137803	Up
ENSMUSG00000047213	Ythdf3	0.310744	0.000594605	0.00823998	Up
ENSMUSG00000047228	A2ml1	1.8746	1.48e-06	4.97e-05	Up
ENSMUSG00000047250	Ptgs1	0.595992	0.000547263	0.00771298	Up
ENSMUSG00000047343	Mettl21c	0.516354	0.000336468	0.00517586	Up
ENSMUSG00000047415	Gpr68	0.37745	0.00125341	0.0151954	Up
ENSMUSG00000047462	A530099J19Rik	1.16068	4.38e-06	0.000128398	Up
ENSMUSG00000047496	Rnf152	1.5086	0.00405178	0.0384047	Up
ENSMUSG00000047511	Olfr1396	1.08011	0.00177073	0.0203114	Up
ENSMUSG00000047565	Acot10	0.801227	0.000154581	0.00272639	Up
ENSMUSG00000047632	Fgfbp3	2.46258	0.00049747	0.00713628	Up
ENSMUSG00000047694	Yipf6	0.350599	0.00154938	0.0181919	Up
ENSMUSG00000047735	Samd9l	1.35977	5.86e-10	3.79e-08	Up
ENSMUSG00000047747	Rnf150	0.619116	0.00280386	0.0290149	Up
ENSMUSG00000047766	Lrrc49	0.767941	0.00192577	0.0214429	Up
ENSMUSG00000047798	Cd300lf	1.06965	0.000189345	0.00322473	Up
ENSMUSG00000047821	Trim16	0.555709	0.00337061	0.0336255	Up
ENSMUSG00000047842	Diras2	0.676503	1.85e-07	7.57e-06	Up
ENSMUSG00000047867	Gimap6	0.41937	1.05e-05	0.000274314	Up
ENSMUSG00000047878	A4galt	0.884901	0.00179908	0.0205487	Up
ENSMUSG00000047898	Ccr4	0.688619	6.82e-10	4.38e-08	Up
ENSMUSG00000047996	Prrg1	0.528716	6.85e-07	2.48e-05	Up
ENSMUSG00000048120	Entpd1	1.12111	2.97e-22	6.68e-20	Up
ENSMUSG00000048138	Dmrt2	0.612546	7.74e-07	2.76e-05	Up
ENSMUSG00000048188	Gm8181	0.606648	0.000829455	0.0109258	Up
ENSMUSG00000048232	Fbxo10	0.532496	6.36e-05	0.00128509	Up
ENSMUSG00000048249	Crebrf	0.534654	2.06e-07	8.37e-06	Up
ENSMUSG00000048280	Zfp738	0.396706	0.000264617	0.00422284	Up
ENSMUSG00000048376	F2r	0.606077	2.59e-05	0.000596393	Up
ENSMUSG00000048402	Gli2	0.848514	0.000767406	0.0102285	Up
ENSMUSG00000048424	Ranbp3l	0.883499	0.00215613	0.0234628	Up
ENSMUSG00000048440	Cyp4f16	0.74969	0.000457168	0.00665545	Up
ENSMUSG00000048485	Zbtb8b	1.02464	0.000689418	0.00933474	Up
ENSMUSG00000048489	8430408G22Rik	1.31211	4.27e-05	0.000915935	Up
ENSMUSG00000048490	Nrip1	0.29003	3.35e-06	0.000101838	Up
ENSMUSG00000048521	Cxcr6	0.517104	5.34e-05	0.00110498	Up
ENSMUSG00000048572	Tmem252	1.02032	1.98e-06	6.36e-05	Up
ENSMUSG00000048612	Myof	0.752208	6.47e-08	2.92e-06	Up
ENSMUSG00000048706	Lurap1l	0.841355	0.000152844	0.00270263	Up
ENSMUSG00000048766	Skint10	1.03439	5.3e-05	0.00109725	Up
ENSMUSG00000048779	P2ry6	0.738826	5.86e-05	0.00119728	Up
ENSMUSG00000048911	Rnf24	0.435885	0.00412629	0.0389844	Up
ENSMUSG00000048916	Gm5540	1.09529	0.000173906	0.00299861	Up
ENSMUSG00000048960	Prex2	0.871836	0.000156924	0.00275807	Up
ENSMUSG00000049037	Clec4a1	0.718741	0.00170587	0.0196949	Up
ENSMUSG00000049092	Gpr137c	0.456316	0.0046716	0.0424522	Up
ENSMUSG00000049093	Il23r	0.837812	0.00118309	0.0144978	Up
ENSMUSG00000049103	Ccr2	0.632349	0.000165744	0.00288477	Up
ENSMUSG00000049109	Themis	0.296784	0.00375993	0.0366527	Up
ENSMUSG00000049119	Fam110b	0.779934	0.000121772	0.00223217	Up
ENSMUSG00000049164	Zfp518a	0.468577	0.000994539	0.0125991	Up
ENSMUSG00000049232	Tigd2	0.295297	0.00298611	0.0304858	Up
ENSMUSG00000049313	Sorl1	0.598494	0.00016134	0.00282673	Up
ENSMUSG00000049362	Olfr173	1.11373	0.000951109	0.0121348	Up
ENSMUSG00000049421	Zfp260	0.433284	0.000762187	0.010176	Up
ENSMUSG00000049470	Aff4	0.314379	1.87e-07	7.67e-06	Up
ENSMUSG00000049493	Pls1	1.14928	7.7e-08	3.41e-06	Up
ENSMUSG00000049502	Dtx3l	0.565273	0.000322682	0.00499014	Up
ENSMUSG00000049690	Nckap5	0.961026	1.97e-05	0.000470683	Up
ENSMUSG00000049744	Arhgap15	0.610412	6.65e-06	0.000183842	Up
ENSMUSG00000049811	Fam161a	0.844424	0.00513423	0.0456281	Up
ENSMUSG00000049972	Skint9	1.12975	0.000118287	0.00217981	Up
ENSMUSG00000049988	Lrrc25	0.899278	0.00101244	0.0127792	Up
ENSMUSG00000049999	Ppp1r3d	1.25819	0.00077432	0.0103058	Up
ENSMUSG00000050103	Agmo	0.832282	0.000479651	0.00693264	Up
ENSMUSG00000050195	Scd4	0.567129	0.00238439	0.0254428	Up
ENSMUSG00000050199	Lgr4	0.637287	0.000373766	0.00566334	Up
ENSMUSG00000050232	Cxcr3	0.781158	0.00188275	0.0210621	Up
ENSMUSG00000050295	Foxc1	0.629477	0.00085273	0.0111593	Up
ENSMUSG00000050312	Nsun3	0.540342	0.0012813	0.0154926	Up
ENSMUSG00000050315	Synpo2	0.707596	8.17e-06	0.000219467	Up
ENSMUSG00000050440	Hamp	1.34984	0.00145575	0.0172523	Up
ENSMUSG00000050530	Fam171a1	0.88975	0.000573844	0.00800827	Up
ENSMUSG00000050533	Gm9845	0.7492	0.00554995	0.0486493	Up
ENSMUSG00000050578	Mmp13	2.37498	6.38e-06	0.000177889	Up
ENSMUSG00000050621	Rps27rt	0.676974	0.000510629	0.00727301	Up
ENSMUSG00000050640	Tmem150c	0.907626	0.000131296	0.00237621	Up
ENSMUSG00000050697	Prkaa1	0.413784	9.05e-05	0.00173375	Up
ENSMUSG00000050730	Arhgap42	0.974734	4.41e-12	4.01e-10	Up
ENSMUSG00000050742	Olfr164	1.42302	1.52e-07	6.29e-06	Up
ENSMUSG00000050756	Defb6	1.93828	2.43e-05	0.000564811	Up
ENSMUSG00000050875	A730017C20Rik	1.22195	1.22e-05	0.000312612	Up
ENSMUSG00000050912	Tmem123	0.442684	5.54e-05	0.00113825	Up
ENSMUSG00000050919	Zfp366	0.598833	0.00183418	0.020673	Up
ENSMUSG00000050947	Amigo1	0.470976	0.00204425	0.0225192	Up
ENSMUSG00000050967	Creg2	1.11589	0.00555441	0.0486807	Up
ENSMUSG00000051000	Fam160a1	0.664226	0.000248441	0.00400617	Up
ENSMUSG00000051037	Zfp455	1.10992	7.5e-06	0.0002038	Up
ENSMUSG00000051043	Gprc5c	0.702792	0.000201926	0.00339297	Up
ENSMUSG00000051048	P4ha3	0.539284	0.0026374	0.0276533	Up
ENSMUSG00000051079	Rgs13	1.93775	5.24e-05	0.00108777	Up
ENSMUSG00000051166	Eml5	0.384689	4.73e-05	0.000999389	Up
ENSMUSG00000051238	Swsap1	0.559358	0.00388282	0.0370883	Up
ENSMUSG00000051285	Pcmtd1	0.46282	1.72e-11	1.45e-09	Up
ENSMUSG00000051339	2900026A02Rik	0.581833	0.00172305	0.0198577	Up
ENSMUSG00000051341	Zfp52	0.754321	3.39e-06	0.000102919	Up
ENSMUSG00000051354	Samd3	1.02753	2.44e-05	0.000565459	Up
ENSMUSG00000051375	Pcdh1	0.650783	0.000247959	0.00400392	Up
ENSMUSG00000051431	Gpr87	0.950966	0.000314445	0.00487091	Up
ENSMUSG00000051435	Fhad1	1.11754	0.000137411	0.0024643	Up
ENSMUSG00000051439	Cd14	0.787202	0.00510382	0.0454349	Up
ENSMUSG00000051497	Kcnj16	0.93354	1.06e-06	3.7e-05	Up
ENSMUSG00000051506	Wdfy4	0.366947	0.00511355	0.0455069	Up
ENSMUSG00000051579	Tceal8	0.783332	0.000854344	0.0111778	Up
ENSMUSG00000051682	Treml4	1.15905	0.000405594	0.00604654	Up
ENSMUSG00000051747	Ttn	0.700898	0.000707692	0.00953795	Up
ENSMUSG00000051855	Mest	0.886539	0.000442373	0.00648214	Up
ENSMUSG00000051969	Tlr11	1.22592	0.000485398	0.00699623	Up
ENSMUSG00000051980	Casr	1.39275	1.11e-06	3.84e-05	Up
ENSMUSG00000051998	Lax1	0.461372	1.6e-05	0.000396152	Up
ENSMUSG00000052013	Btla	0.960993	3.41e-11	2.75e-09	Up
ENSMUSG00000052062	Pard3b	0.560649	4.74e-05	0.00100211	Up
ENSMUSG00000052155	Acvr2a	0.916336	2.78e-11	2.28e-09	Up
ENSMUSG00000052160	Pld4	0.877305	5.17e-10	3.38e-08	Up
ENSMUSG00000052248	Zeb2os	1.54821	0.000931273	0.0119311	Up
ENSMUSG00000052336	Cx3cr1	0.71434	0.00293969	0.0300936	Up
ENSMUSG00000052387	Trpm3	0.76235	2.97e-06	9.15e-05	Up
ENSMUSG00000052496	Pkdrej	1.35664	0.00419443	0.0394937	Up
ENSMUSG00000052512	Nav2	0.530021	4.15e-05	0.000894216	Up
ENSMUSG00000052534	Pbx1	0.82789	1.33e-11	1.14e-09	Up
ENSMUSG00000052544	St6galnac3	0.653045	0.000165256	0.00287899	Up
ENSMUSG00000052560	Cpne8	0.616778	0.000469432	0.00680266	Up
ENSMUSG00000052572	Dlg2	0.91157	8.37e-07	2.98e-05	Up
ENSMUSG00000052613	Pcdh15	0.780485	0.00280302	0.0290116	Up
ENSMUSG00000052631	Sh2d6	2.06524	3.69e-08	1.76e-06	Up
ENSMUSG00000052675	Zfp112	0.695571	0.00293954	0.0300936	Up
ENSMUSG00000052676	Zmat1	0.467613	0.000895849	0.0115542	Up
ENSMUSG00000052713	Zfp608	0.78456	4.99e-05	0.00104222	Up
ENSMUSG00000052727	Map1b	0.395905	0.00475629	0.0430736	Up
ENSMUSG00000052736	Klrc2	1.4477	1.88e-06	6.06e-05	Up
ENSMUSG00000052821	Cysltr1	1.4803	1.79e-05	0.000435188	Up
ENSMUSG00000052861	Dnah6	0.978791	0.00274585	0.0285584	Up
ENSMUSG00000052914	Cyp2j6	0.962705	0.000336183	0.00517299	Up
ENSMUSG00000052942	Glis3	0.985594	2.74e-06	8.5e-05	Up
ENSMUSG00000052957	Gas1	0.535195	0.00197838	0.0219242	Up
ENSMUSG00000052974	Cyp2f2	1.28894	6.1e-07	2.23e-05	Up
ENSMUSG00000052981	Ube2ql1	0.814892	0.000459749	0.00668305	Up
ENSMUSG00000053062	Jam2	0.848861	5.27e-07	1.96e-05	Up
ENSMUSG00000053063	Clec12a	0.696103	0.000831372	0.0109391	Up
ENSMUSG00000053110	Yap1	0.547001	0.000649764	0.00887579	Up
ENSMUSG00000053117	E330013P04Rik	1.16665	0.00193358	0.021518	Up
ENSMUSG00000053137	Mapk11	0.494535	0.000212642	0.0035353	Up
ENSMUSG00000053158	Fes	0.783945	1.88e-05	0.000453864	Up
ENSMUSG00000053192	Mllt11	0.427897	0.000961566	0.0122401	Up
ENSMUSG00000053205	Styx	0.327845	0.0022093	0.0239055	Up
ENSMUSG00000053347	Zfp943	0.604185	2.66e-07	1.06e-05	Up
ENSMUSG00000053414	Hunk	0.573064	0.00070936	0.00955347	Up
ENSMUSG00000053477	Tcf4	0.406732	5.26e-06	0.000150263	Up
ENSMUSG00000053541	Gm4759	1.48222	6.49e-22	1.42e-19	Up
ENSMUSG00000053550	Shisa7	2.42138	2.7e-05	0.00061803	Up
ENSMUSG00000053580	Tanc2	0.630205	3.41e-05	0.00075382	Up
ENSMUSG00000053641	Dennd4a	0.415222	1.49e-05	0.000373939	Up
ENSMUSG00000053693	Mast1	0.616431	0.00328173	0.0328807	Up
ENSMUSG00000053835	H2-T24	0.993214	7.39e-06	0.000201607	Up
ENSMUSG00000053870	Fpgt	0.588197	1.9e-05	0.000456955	Up
ENSMUSG00000053931	Cnn3	0.433263	2.52e-05	0.000581377	Up
ENSMUSG00000054072	Iigp1	1.17037	2.68e-06	8.32e-05	Up
ENSMUSG00000054162	Spock3	1.13943	0.000405436	0.00604654	Up
ENSMUSG00000054203	Ifi205	0.890335	2.05e-08	1.03e-06	Up
ENSMUSG00000054263	Lifr	0.955899	1.91e-15	2.55e-13	Up
ENSMUSG00000054404	Slfn5	1.20608	1.86e-06	6.04e-05	Up
ENSMUSG00000054412	Gm4793	1.78669	0.000125732	0.00229414	Up
ENSMUSG00000054414	Slc30a7	0.2944	0.0043859	0.0407776	Up
ENSMUSG00000054435	Gimap4	0.630097	3.36e-05	0.00074486	Up
ENSMUSG00000054493	Gm9947	1.49534	4.86e-05	0.0010228	Up
ENSMUSG00000054509	Parp4	0.437522	5.61e-06	0.000158952	Up
ENSMUSG00000054556	Gm4876	0.737	0.00208979	0.0229389	Up
ENSMUSG00000054640	Slc8a1	0.769592	2.24e-06	7.09e-05	Up
ENSMUSG00000054679	Srsf12	1.21288	1.14e-05	0.000294904	Up
ENSMUSG00000054723	Vmac	0.438405	0.000346016	0.00530809	Up
ENSMUSG00000054737	Zfp182	0.428872	0.000573001	0.00799852	Up
ENSMUSG00000054889	Dsp	0.429824	6.96e-06	0.000191364	Up
ENSMUSG00000054892	Txk	0.300484	0.00052686	0.00747288	Up
ENSMUSG00000055128	Cgrrf1	0.757799	0.00390282	0.0372241	Up
ENSMUSG00000055150	Zfp78	0.815133	0.00133493	0.0160501	Up
ENSMUSG00000055320	Tead1	0.734986	6.87e-06	0.000188936	Up
ENSMUSG00000055322	Tns1	0.363176	4.46e-06	0.000130038	Up
ENSMUSG00000055333	Fat2	0.966436	2.56e-10	1.78e-08	Up
ENSMUSG00000055370	Gm9968	0.688978	5.49e-07	2.03e-05	Up
ENSMUSG00000055435	Maf	0.742318	3.21e-12	2.97e-10	Up
ENSMUSG00000055480	Zfp458	0.623901	0.000131386	0.00237621	Up
ENSMUSG00000055541	Lair1	0.85036	1.56e-06	5.2e-05	Up
ENSMUSG00000055546	Timd4	1.21361	0.000111755	0.00208016	Up
ENSMUSG00000055675	Kbtbd11	0.445168	8.32e-05	0.00161505	Up
ENSMUSG00000055809	Dnaaf3	1.35778	2.15e-05	0.000507494	Up
ENSMUSG00000055917	Zfp277	0.535112	1.44e-07	6.01e-06	Up
ENSMUSG00000055960	Skint4	1.13712	7.62e-06	0.000206732	Up
ENSMUSG00000056025	Clca3a1	1.42587	4.49e-05	0.000957405	Up
ENSMUSG00000056069	Fam105a	0.330067	0.00366945	0.0359829	Up
ENSMUSG00000056144	Trim34a	0.830991	0.000144263	0.0025689	Up
ENSMUSG00000056211	R3hdm1	0.271675	0.00490144	0.0440717	Up
ENSMUSG00000056214	Pard6g	0.323682	0.00269089	0.0281185	Up
ENSMUSG00000056220	Pla2g4a	0.796886	1.99e-05	0.000474802	Up
ENSMUSG00000056222	Spock1	1.92478	0.00403879	0.0383077	Up
ENSMUSG00000056258	Kcnq3	0.566272	0.00433399	0.0404168	Up
ENSMUSG00000056260	Lrif1	0.431079	7.38e-05	0.00145711	Up
ENSMUSG00000056268	Dennd1b	0.296812	0.000100002	0.00189315	Up
ENSMUSG00000056290	Ms4a4b	0.943984	1.51e-08	7.81e-07	Up
ENSMUSG00000056383	AI987944	0.664769	0.000234722	0.0038261	Up
ENSMUSG00000056429	Tgoln1	0.346295	6.41e-07	2.34e-05	Up
ENSMUSG00000056468	5730596B20Rik	1.13128	0.000253641	0.00407346	Up
ENSMUSG00000056492	Adgrf5	1.1515	1.46e-09	8.9e-08	Up
ENSMUSG00000056498	Tmem154	0.360194	0.00493273	0.0442785	Up
ENSMUSG00000056515	Rab31	0.54903	0.00218525	0.0236868	Up
ENSMUSG00000056529	Ptafr	0.89865	3.01e-05	0.000680055	Up
ENSMUSG00000056553	Ptprn2	0.832716	0.00488873	0.043993	Up
ENSMUSG00000056592	Zfp658	0.51615	0.000955532	0.01218	Up
ENSMUSG00000056602	Fry	0.437408	0.000516316	0.00733833	Up
ENSMUSG00000056608	Chd9	0.287105	3.79e-05	0.000826101	Up
ENSMUSG00000056632	Dsg3	1.61493	0.000495196	0.00711101	Up
ENSMUSG00000056673	Kdm5d	0.278389	0.0057468	0.0499801	Up
ENSMUSG00000056870	Gulp1	1.81658	1.8e-06	5.86e-05	Up
ENSMUSG00000056888	Glipr1	0.884118	3.88e-15	5.02e-13	Up
ENSMUSG00000056999	Ide	1.30979	4.3e-07	1.63e-05	Up
ENSMUSG00000057069	Ero1lb	0.427285	0.00263351	0.027623	Up
ENSMUSG00000057133	Chd6	0.31263	5.44e-07	2.02e-05	Up
ENSMUSG00000057143	Trim12c	0.519385	0.000290903	0.0045597	Up
ENSMUSG00000057191	AB124611	0.427997	0.00283071	0.0292436	Up
ENSMUSG00000057223	Gm6578	1.2031	0.0015734	0.0184145	Up
ENSMUSG00000057329	Bcl2	0.420377	0.00043351	0.00637975	Up
ENSMUSG00000057335	Cep170	0.395554	0.000924557	0.0118561	Up
ENSMUSG00000057396	Zfp759	0.954893	4.07e-07	1.55e-05	Up
ENSMUSG00000057457	Phex	1.59201	0.00404813	0.0383878	Up
ENSMUSG00000057554	Lgals8	0.483506	4.38e-09	2.47e-07	Up
ENSMUSG00000057596	Trim30d	1.24464	3.35e-07	1.3e-05	Up
ENSMUSG00000057715	A830018L16Rik	0.812538	0.000205848	0.0034424	Up
ENSMUSG00000057722	Lepr	1.28447	1.28e-07	5.4e-06	Up
ENSMUSG00000057766	Ankrd29	1.47309	6.71e-11	5.2e-09	Up
ENSMUSG00000057880	Abat	0.637173	3.12e-10	2.13e-08	Up
ENSMUSG00000057982	Zfp809	0.412268	2.19e-06	6.98e-05	Up
ENSMUSG00000058017	Serpinb3d	2.0281	2.57e-05	0.000592721	Up
ENSMUSG00000058056	Palld	0.660682	1.42e-05	0.000356415	Up
ENSMUSG00000058093	Zfp729b	0.396438	0.0027822	0.0288499	Up
ENSMUSG00000058099	Nfam1	0.482049	0.00230491	0.0247566	Up
ENSMUSG00000058135	Gstm1	0.815112	0.00213296	0.0233047	Up
ENSMUSG00000058163	Gm5431	1.70079	5.21e-07	1.94e-05	Up
ENSMUSG00000058248	Kcnh1	1.15524	2.93e-12	2.75e-10	Up
ENSMUSG00000058254	Tspan7	0.952839	0.00178945	0.0204598	Up
ENSMUSG00000058297	Spock2	0.453275	0.00328596	0.0329112	Up
ENSMUSG00000058318	Phf21a	0.293807	0.00223674	0.0241412	Up
ENSMUSG00000058325	Dock1	0.429706	0.000178045	0.00305668	Up
ENSMUSG00000058331	Zfp85	0.476042	0.00176222	0.0202318	Up
ENSMUSG00000058470	Gm8369	0.916858	1.77e-05	0.000430881	Up
ENSMUSG00000058624	Gda	0.726265	0.00212637	0.0232612	Up
ENSMUSG00000058690	Ccser2	0.396957	1.93e-05	0.000463386	Up
ENSMUSG00000058715	Fcer1g	1.03171	4.22e-12	3.86e-10	Up
ENSMUSG00000058818	Pirb	0.81235	0.000544539	0.00767849	Up
ENSMUSG00000058835	Abi1	0.289565	0.000264535	0.00422284	Up
ENSMUSG00000058881	Zfp516	0.553374	3.54e-05	0.000778915	Up
ENSMUSG00000058900	Rsl1	0.755085	0.000162798	0.00284868	Up
ENSMUSG00000058921	Slc10a5	1.58251	0.0014798	0.0174962	Up
ENSMUSG00000059142	Zfp945	0.868994	4.41e-10	2.91e-08	Up
ENSMUSG00000059182	Skap2	0.543337	0.000433432	0.00637975	Up
ENSMUSG00000059423	Zfp933	0.455014	4.52e-05	0.000961943	Up
ENSMUSG00000059456	Ptk2b	0.372381	0.000243667	0.0039487	Up
ENSMUSG00000059493	Nhs	0.749882	0.000261583	0.00418377	Up
ENSMUSG00000059495	Arhgef12	0.77289	1.26e-15	1.69e-13	Up
ENSMUSG00000059498	Fcgr3	1.46393	1.24e-21	2.64e-19	Up
ENSMUSG00000059540	Tcea2	0.379694	0.00504029	0.0449993	Up
ENSMUSG00000059588	Calcrl	0.415323	0.00203916	0.0224721	Up
ENSMUSG00000059742	Kcnh7	1.51225	2.85e-05	0.000649027	Up
ENSMUSG00000059854	Hydin	1.45163	6.17e-14	7.07e-12	Up
ENSMUSG00000059883	Irak4	0.423406	0.00153868	0.0180883	Up
ENSMUSG00000059898	Dsc3	0.828089	1.12e-06	3.87e-05	Up
ENSMUSG00000059921	Unc5c	0.663713	0.000698199	0.00942832	Up
ENSMUSG00000059956	Serpinb12	1.53016	1.86e-06	6.04e-05	Up
ENSMUSG00000059994	Fcrl1	1.11009	8.64e-05	0.00166757	Up
ENSMUSG00000060044	Tmem26	1.46	3.92e-11	3.16e-09	Up
ENSMUSG00000060063	Alox5ap	0.746536	0.000693848	0.00938555	Up
ENSMUSG00000060090	Rp2	0.356106	0.00455485	0.0416093	Up
ENSMUSG00000060131	Atp8b4	0.66718	3.62e-05	0.000792061	Up
ENSMUSG00000060147	Serpinb6a	0.506142	0.000438461	0.00643792	Up
ENSMUSG00000060206	Zfp462	0.946306	2.61e-11	2.15e-09	Up
ENSMUSG00000060301	2610008E11Rik	0.534896	1.58e-09	9.6e-08	Up
ENSMUSG00000060336	Zfp937	1.15866	0.000488914	0.00703718	Up
ENSMUSG00000060402	Chst8	0.931416	0.00491801	0.0441992	Up
ENSMUSG00000060441	Trim5	0.648614	0.000568162	0.00794096	Up
ENSMUSG00000060487	Samd5	0.61527	7.66e-05	0.00150365	Up
ENSMUSG00000060509	Xcr1	0.701139	0.00221176	0.0239205	Up
ENSMUSG00000060548	Tnfrsf19	0.85246	0.00172355	0.0198577	Up
ENSMUSG00000060591	Ifitm2	1.16236	5.25e-05	0.001088	Up
ENSMUSG00000060802	B2m	0.856812	7.32e-10	4.68e-08	Up
ENSMUSG00000060961	Slc4a4	0.673153	2.61e-05	0.000598592	Up
ENSMUSG00000060962	Dmkn	1.31314	0.00274212	0.0285356	Up
ENSMUSG00000061039	Olfr920	0.886113	0.00258358	0.0271867	Up
ENSMUSG00000061048	Cdh3	0.767666	0.000877787	0.0113745	Up
ENSMUSG00000061080	Lsamp	1.06452	0.00255643	0.0269726	Up
ENSMUSG00000061132	Blnk	0.834539	7.55e-06	0.000204848	Up
ENSMUSG00000061353	Cxcl12	0.618364	1.22e-05	0.000312465	Up
ENSMUSG00000061371	Zfp873	0.389013	0.00206643	0.0227199	Up
ENSMUSG00000061411	Nol4l	0.669523	0.000137336	0.00246374	Up
ENSMUSG00000061436	Hipk2	0.635683	1.21e-07	5.14e-06	Up
ENSMUSG00000061455	Stx17	0.481494	0.00356004	0.0351237	Up
ENSMUSG00000061601	Pclo	0.928634	2.85e-10	1.97e-08	Up
ENSMUSG00000061665	Cd2ap	0.517126	3.28e-14	3.88e-12	Up
ENSMUSG00000061689	Dlgap4	0.351909	0.00256685	0.0270671	Up
ENSMUSG00000061762	Tac1	1.70777	0.00524489	0.0464078	Up
ENSMUSG00000061972	Olfr99	1.38371	3.85e-07	1.48e-05	Up
ENSMUSG00000062007	Hsh2d	0.632304	0.00260339	0.0273493	Up
ENSMUSG00000062127	Cttnbp2nl	0.9119	1.13e-10	8.43e-09	Up
ENSMUSG00000062184	Hs6st2	1.53308	0.00224158	0.024184	Up
ENSMUSG00000062345	Serpinb2	1.20969	3.52e-06	0.000106264	Up
ENSMUSG00000062609	Kcnj15	1.18026	3.26e-12	3.01e-10	Up
ENSMUSG00000062627	Mysm1	0.382224	3.33e-08	1.61e-06	Up
ENSMUSG00000062743	Zfp677	0.810828	2.01e-06	6.45e-05	Up
ENSMUSG00000062826	Ces2f	0.899014	1.99e-05	0.00047636	Up
ENSMUSG00000062866	Phactr2	0.964017	4.38e-19	7.78e-17	Up
ENSMUSG00000062939	Stat4	0.590326	5.87e-06	0.000165395	Up
ENSMUSG00000062980	Cped1	0.84354	0.000276392	0.00437426	Up
ENSMUSG00000063060	Sox7	1.62027	7.77e-06	0.000209725	Up
ENSMUSG00000063077	Kif1b	0.435443	1.32e-05	0.000336462	Up
ENSMUSG00000063130	Calml3	1.90844	7.55e-09	4.1e-07	Up
ENSMUSG00000063142	Kcnma1	0.703847	0.000344851	0.00529168	Up
ENSMUSG00000063157	Csn2	0.873972	0.000612127	0.00843434	Up
ENSMUSG00000063286	Gm8995	1.34775	7.79e-11	5.96e-09	Up
ENSMUSG00000063558	Aox1	0.685112	3e-06	9.24e-05	Up
ENSMUSG00000063611	Gm10134	1.32968	0.000123563	0.00226052	Up
ENSMUSG00000063760	Rnf217	0.727042	4.05e-05	0.000875095	Up
ENSMUSG00000063887	Nlgn1	0.761291	2.45e-05	0.000567624	Up
ENSMUSG00000063894	Zkscan8	0.442152	0.00123484	0.0150159	Up
ENSMUSG00000064065	Ipcef1	0.402947	0.000404431	0.00603893	Up
ENSMUSG00000064090	Vrk2	0.473098	0.00424912	0.039907	Up
ENSMUSG00000064225	Paqr9	1.08805	2.37e-10	1.66e-08	Up
ENSMUSG00000064262	Gimap8	0.633304	1.72e-06	5.63e-05	Up
ENSMUSG00000064280	Ccdc146	1.31356	0.00276089	0.028661	Up
ENSMUSG00000064289	Tank	0.515598	2.85e-06	8.82e-05	Up
ENSMUSG00000064294	Aox3	1.20598	0.000537827	0.00759894	Up
ENSMUSG00000064329	Scn1a	0.987441	1.93e-06	6.22e-05	Up
ENSMUSG00000064373	Selenop	1.13652	3.81e-31	1.81e-28	Up
ENSMUSG00000064492	Gm22060	1.06365	0.000482771	0.00697046	Up
ENSMUSG00000064494	Gm22063	1.50598	4.07e-05	0.000878392	Up
ENSMUSG00000064999	Gm26035	0.866899	0.000262542	0.00419455	Up
ENSMUSG00000065864	Gm24031	1.02021	0.00504451	0.0450297	Up
ENSMUSG00000066000	Zfp979	1.72905	0.000810474	0.0107124	Up
ENSMUSG00000066191	Anks6	0.732536	0.00280978	0.0290653	Up
ENSMUSG00000066258	Trim12a	0.791082	1.76e-10	1.27e-08	Up
ENSMUSG00000066363	Serpina3f	1.59036	7.64e-05	0.00150131	Up
ENSMUSG00000066595	Flvcr1	0.378629	0.000311274	0.00482449	Up
ENSMUSG00000066677	Pydc3	1.54666	2.01e-08	1.02e-06	Up
ENSMUSG00000066684	Pilrb1	1.2179	0.000701225	0.00946688	Up
ENSMUSG00000066755	Tnfsf18	1.43485	0.00165201	0.0191768	Up
ENSMUSG00000066829	Zfp810	0.365235	0.00209436	0.0229709	Up
ENSMUSG00000066861	Oas1g	1.26661	0.000203119	0.00340703	Up
ENSMUSG00000067219	Nipal1	0.590886	0.00184266	0.0207475	Up
ENSMUSG00000067336	Bmpr2	0.809488	1.08e-15	1.46e-13	Up
ENSMUSG00000067341	H2-Eb2	0.61689	0.00415655	0.0392035	Up
ENSMUSG00000067591	Klra3	1.26003	0.00327734	0.0328427	Up
ENSMUSG00000067599	Klra7	1.84291	0.000135729	0.00243886	Up
ENSMUSG00000067750	Khdc1a	1.58223	3.62e-06	0.000108839	Up
ENSMUSG00000067851	Arfgef1	0.411842	5.71e-06	0.000161623	Up
ENSMUSG00000067878	Map7d3	1.35288	0.00110008	0.0136189	Up
ENSMUSG00000067928	Zfp760	0.608061	0.000228492	0.00374655	Up
ENSMUSG00000067931	Zfp948	0.903231	6.24e-05	0.00126579	Up
ENSMUSG00000068036	Afdn	0.764602	1.28e-12	1.26e-10	Up
ENSMUSG00000068130	Zfp442	1.07999	0.000436064	0.00640951	Up
ENSMUSG00000068134	Zfp120	0.594726	3.98e-05	0.00086254	Up
ENSMUSG00000068227	Il2rb	0.780004	8.16e-05	0.00158898	Up
ENSMUSG00000068245	Phf11d	1.4646	0.000117794	0.00217505	Up
ENSMUSG00000068457	Uty	0.370038	0.00087977	0.0113949	Up
ENSMUSG00000068463	B630019A10Rik	0.815808	0.000201323	0.0033851	Up
ENSMUSG00000068551	Zfp467	0.52494	0.00185554	0.0208502	Up
ENSMUSG00000068606	Gm4841	0.903766	0.00213969	0.0233434	Up
ENSMUSG00000068748	Ptprz1	1.25764	1.06e-15	1.44e-13	Up
ENSMUSG00000068876	Cgn	0.454103	0.00285422	0.0294263	Up
ENSMUSG00000068959	Zfp619	0.907632	1.21e-05	0.000309262	Up
ENSMUSG00000069114	Zbtb10	0.523352	0.00284006	0.0293184	Up
ENSMUSG00000069170	Adgrv1	1.95472	0.000194365	0.00329607	Up
ENSMUSG00000069184	Zfp72	0.906038	1.57e-05	0.000391573	Up
ENSMUSG00000069206	Zfp874a	0.503193	0.00033978	0.00522255	Up
ENSMUSG00000069227	Gprin1	0.809299	0.000780066	0.0103672	Up
ENSMUSG00000069255	Dusp22	0.661017	0.0001302	0.00235937	Up
ENSMUSG00000069495	Epc2	0.31234	0.00144818	0.0171846	Up
ENSMUSG00000069581	Tspear	1.62661	0.00175691	0.0201792	Up
ENSMUSG00000069601	Ank3	0.584036	1.54e-06	5.15e-05	Up
ENSMUSG00000069633	Pex11g	0.609763	0.00129676	0.0156659	Up
ENSMUSG00000069743	Zfp820	0.646103	0.000312505	0.00484222	Up
ENSMUSG00000069808	Fam57a	0.465553	0.000729432	0.00979289	Up
ENSMUSG00000069833	Ahnak	0.586506	3.52e-11	2.84e-09	Up
ENSMUSG00000069855	Slc47a2	1.53273	0.00234388	0.0250835	Up
ENSMUSG00000069874	Irgm2	0.71278	0.000581115	0.00808534	Up
ENSMUSG00000069892	9930111J21Rik2	1.64801	3.37e-13	3.54e-11	Up
ENSMUSG00000070034	Sp110	0.437725	1.15e-06	3.97e-05	Up
ENSMUSG00000070044	Fam149a	0.799202	0.00456797	0.0417017	Up
ENSMUSG00000070047	Fat1	0.787772	2.6e-16	3.77e-14	Up
ENSMUSG00000070056	Mfhas1	0.340702	0.00175621	0.0201753	Up
ENSMUSG00000070327	Rnf213	0.784935	0.00164788	0.0191409	Up
ENSMUSG00000070369	Itgad	1.26114	5.75e-10	3.74e-08	Up
ENSMUSG00000070385	Ampd1	0.681962	2.46e-05	0.000568511	Up
ENSMUSG00000070390	Nlrp1b	0.944845	7.24e-06	0.000197827	Up
ENSMUSG00000070427	Il18bp	0.431411	3.35e-05	0.0007422	Up
ENSMUSG00000070501	Ifi214	0.997861	4.08e-06	0.000121016	Up
ENSMUSG00000070509	Rgma	0.851357	3.26e-09	1.87e-07	Up
ENSMUSG00000070565	Rasal2	0.852497	2.56e-06	8.01e-05	Up
ENSMUSG00000070601	Vmn2r84	0.73376	1e-09	6.27e-08	Up
ENSMUSG00000070605	Zfp992	1.0575	0.00336894	0.0336149	Up
ENSMUSG00000070729	Gm12966	0.417593	0.00060076	0.00830867	Up
ENSMUSG00000070780	Rbm47	0.589042	1.64e-06	5.44e-05	Up
ENSMUSG00000070942	Il1rl2	0.50557	0.000374287	0.00566814	Up
ENSMUSG00000071064	Zfp827	0.562882	1.14e-05	0.000295648	Up
ENSMUSG00000071103	1700029J07Rik	0.72782	0.000765284	0.0102088	Up
ENSMUSG00000071141	Rpl36a-ps3	1.31812	0.000292975	0.0045857	Up
ENSMUSG00000071176	Arhgef10	0.470679	0.00145821	0.017274	Up
ENSMUSG00000071203	Naip5	1.59248	9.52e-12	8.31e-10	Up
ENSMUSG00000071266	Zfp946	0.906951	1.49e-06	5e-05	Up
ENSMUSG00000071267	Zfp942	0.412385	0.00122843	0.0149478	Up
ENSMUSG00000071281	Zfp65	0.439963	0.00460449	0.0419454	Up
ENSMUSG00000071392	Ect2l	1.39732	7.57e-05	0.00148908	Up
ENSMUSG00000071551	Akr1c19	1.72706	0.000824	0.0108602	Up
ENSMUSG00000071640	Stxbp3-ps	0.724205	0.00139349	0.016646	Up
ENSMUSG00000071713	Csf2rb	0.581626	0.00295036	0.0301764	Up
ENSMUSG00000071716	Apol7e	0.748978	4.91e-06	0.000141563	Up
ENSMUSG00000071855	Ccdc112	0.842248	0.00256994	0.0270795	Up
ENSMUSG00000071856	Mcc	0.487023	0.00181844	0.0205761	Up
ENSMUSG00000072115	Ang	1.02638	0.000249526	0.004019	Up
ENSMUSG00000072244	Trim6	1.24887	0.00036808	0.00560166	Up
ENSMUSG00000072294	Klf12	0.707677	0.00304296	0.0309523	Up
ENSMUSG00000072501	Phf20l1	0.315499	7.28e-07	2.61e-05	Up
ENSMUSG00000072596	Ear2	1.50238	1.04e-11	9.04e-10	Up
ENSMUSG00000072620	Slfn2	0.590981	0.00035144	0.00538237	Up
ENSMUSG00000072663	Spef2	0.727198	0.0035766	0.0352557	Up
ENSMUSG00000072704	Smim10l1	0.467912	0.000367818	0.00559922	Up
ENSMUSG00000072762	4930522L14Rik	0.747744	0.000122677	0.00224801	Up
ENSMUSG00000072872	Rybp	0.390221	0.00532081	0.0469747	Up
ENSMUSG00000072949	Acot1	1.43307	1.04e-05	0.000272526	Up
ENSMUSG00000073008	Gpr174	0.755453	9.09e-07	3.2e-05	Up
ENSMUSG00000073155	1810058I24Rik	0.440025	0.00138504	0.0165664	Up
ENSMUSG00000073427	Gm4924	0.594658	0.00522018	0.0462334	Up
ENSMUSG00000073448	Gm10509	1.27365	2.85e-08	1.4e-06	Up
ENSMUSG00000073471	Rsph3a	0.741015	0.00516732	0.0458677	Up
ENSMUSG00000073489	Ifi204	1.63248	1.47e-08	7.64e-07	Up
ENSMUSG00000073490	Ifi207	1.71338	5.39e-09	3e-07	Up
ENSMUSG00000073491	Ifi213	1.60192	1.65e-05	0.000407286	Up
ENSMUSG00000073530	Pappa2	0.994172	0.000947822	0.012104	Up
ENSMUSG00000073555	Gm4951	0.833884	0.00397972	0.037851	Up
ENSMUSG00000073590	3222401L13Rik	0.952466	0.00217687	0.0236145	Up
ENSMUSG00000073643	Wdfy1	0.602906	2.44e-05	0.000564918	Up
ENSMUSG00000073678	Pgap1	0.483218	2.32e-05	0.000541924	Up
ENSMUSG00000073792	Alg6	0.343022	0.00447978	0.0410927	Up
ENSMUSG00000073821	8030451A03Rik	0.775391	0.00132224	0.015939	Up
ENSMUSG00000073902	Gm1966	1.30392	1.73e-17	2.79e-15	Up
ENSMUSG00000073988	Ttpa	1.27189	0.0018562	0.0208534	Up
ENSMUSG00000074024	4632427E13Rik	0.353421	9.34e-06	0.000247152	Up
ENSMUSG00000074166	AW146154	0.557004	0.000315983	0.004892	Up
ENSMUSG00000074171	Gm6658	1.62128	8.06e-05	0.00157228	Up
ENSMUSG00000074199	Krtdap	1.50795	0.000236686	0.0038547	Up
ENSMUSG00000074207	Adh1	0.708774	0.00366176	0.0359422	Up
ENSMUSG00000074212	Dnajb14	0.313631	0.00552413	0.0484613	Up
ENSMUSG00000074240	Cib3	1.85892	6.25e-05	0.00126579	Up
ENSMUSG00000074272	Ceacam1	0.988881	6.6e-06	0.000182773	Up
ENSMUSG00000074305	Peak1	0.505649	4.14e-08	1.95e-06	Up
ENSMUSG00000074342	I830077J02Rik	0.804044	3.15e-05	0.00070491	Up
ENSMUSG00000074415	2610203C20Rik	0.960429	2.34e-10	1.64e-08	Up
ENSMUSG00000074519	Zfp971	0.73377	0.00156072	0.0182892	Up
ENSMUSG00000074622	Mafb	0.563646	6.34e-08	2.87e-06	Up
ENSMUSG00000074733	Zfp950	0.694547	5.97e-12	5.34e-10	Up
ENSMUSG00000074794	Arrdc3	0.599174	4.73e-06	0.000137187	Up
ENSMUSG00000074829	2010315B03Rik	0.431691	0.00387296	0.0370451	Up
ENSMUSG00000074852	Hpse2	1.364	0.000439815	0.00645116	Up
ENSMUSG00000074896	Ifit3	1.43298	0.00013638	0.00244897	Up
ENSMUSG00000075010	AW112010	1.18508	4.58e-06	0.00013338	Up
ENSMUSG00000075122	Cd80	0.767547	0.000327266	0.00505399	Up
ENSMUSG00000075217	4833423E24Rik	0.910996	0.00061433	0.0084563	Up
ENSMUSG00000075270	Pde11a	0.721287	0.00304773	0.0309951	Up
ENSMUSG00000075316	Scn9a	1.24947	7.26e-07	2.61e-05	Up
ENSMUSG00000075520	Malrd1	1.37215	0.00245369	0.0260619	Up
ENSMUSG00000075590	Nrbp2	1.2984	9.46e-18	1.54e-15	Up
ENSMUSG00000075602	Ly6a	0.822596	4.55e-05	0.000966542	Up
ENSMUSG00000076433	Cep295nl	0.515164	0.0028682	0.0294912	Up
ENSMUSG00000076435	Acsf2	0.524534	0.0039614	0.0377069	Up
ENSMUSG00000076474	Trbv17	0.601786	1.68e-05	0.000412194	Up
ENSMUSG00000076522	Igkv16-104	1.26528	0.00278299	0.0288528	Up
ENSMUSG00000076532	Igkv4-91	1.10081	0.00432282	0.0403533	Up
ENSMUSG00000076605	Igkj2	1.46149	3.44e-05	0.000759395	Up
ENSMUSG00000076609	Igkc	1.28223	0.000104509	0.00195975	Up
ENSMUSG00000076613	Ighg2b	1.62431	2.86e-11	2.34e-09	Up
ENSMUSG00000076614	Ighg1	2.77979	0.000325859	0.00503507	Up
ENSMUSG00000076618	Ighj4	1.64378	6.26e-06	0.000174983	Up
ENSMUSG00000076620	Ighj2	0.950194	0.0022541	0.0242813	Up
ENSMUSG00000076621	Ighj1	1.02319	0.00122237	0.0148904	Up
ENSMUSG00000076752	Tcrg-C2	0.556618	0.00454985	0.0415834	Up
ENSMUSG00000076754	Trgv2	0.720739	6.18e-06	0.000173089	Up
ENSMUSG00000076761	Trav5-1	1.81102	0.000557986	0.00783623	Up
ENSMUSG00000076796	Trav16d-dv11	1.41024	0.000248059	0.00400392	Up
ENSMUSG00000076821	Trav8n-2	1.47103	0.000527454	0.00747939	Up
ENSMUSG00000076840	Trav14-1	0.616245	1.48e-06	4.97e-05	Up
ENSMUSG00000076905	Traj24	0.546391	0.000648862	0.00886784	Up
ENSMUSG00000076906	Traj23	0.639451	0.000128614	0.00233445	Up
ENSMUSG00000076908	Traj21	0.783182	0.000542287	0.00765257	Up
ENSMUSG00000076921	Traj7	0.596495	0.00223001	0.0240779	Up
ENSMUSG00000076922	Traj6	0.621015	3.85e-05	0.00083745	Up
ENSMUSG00000076925	Traj3	0.62531	0.0016399	0.0190721	Up
ENSMUSG00000076928	Trac	0.566659	8.34e-09	4.49e-07	Up
ENSMUSG00000076937	Iglc2	1.21083	0.00301583	0.0307214	Up
ENSMUSG00000076940	Iglv2	1.20416	0.00463713	0.0421943	Up
ENSMUSG00000078117	Gm16485	1.34006	8.85e-12	7.74e-10	Up
ENSMUSG00000078122	F630028O10Rik	1.40253	1.55e-11	1.31e-09	Up
ENSMUSG00000078190	Dnm3os	1.6275	1.23e-10	9.14e-09	Up
ENSMUSG00000078234	Klhdc7a	0.446338	0.00321289	0.0323077	Up
ENSMUSG00000078247	Airn	0.384067	0.000807059	0.0106749	Up
ENSMUSG00000078349	AW011738	0.857499	0.000119237	0.0021944	Up
ENSMUSG00000078435	AU041133	0.79249	2.78e-05	0.000634592	Up
ENSMUSG00000078495	Zfp984	0.675958	1.85e-05	0.000448575	Up
ENSMUSG00000078496	Zfp982	1.50588	0.00132455	0.0159581	Up
ENSMUSG00000078599	Skint8	1.0643	3.14e-05	0.000704116	Up
ENSMUSG00000078606	Gm4070	2.23245	0.00246088	0.0261333	Up
ENSMUSG00000078612	Fyb2	1.2915	1.41e-06	4.75e-05	Up
ENSMUSG00000078763	Slfn1	0.740789	0.000582213	0.00809655	Up
ENSMUSG00000078784	1810022K09Rik	0.72362	1.66e-06	5.47e-05	Up
ENSMUSG00000078853	Igtp	0.46831	0.000886961	0.0114773	Up
ENSMUSG00000078861	Zfp931	0.97256	3.96e-07	1.52e-05	Up
ENSMUSG00000078862	Gm14326	1.24471	7.97e-05	0.00155797	Up
ENSMUSG00000078870	Gm14410	1.29011	1.7e-05	0.000417197	Up
ENSMUSG00000078878	Gm14305	0.970609	0.000843255	0.0110614	Up
ENSMUSG00000078920	Ifi47	0.51698	0.00458715	0.0418488	Up
[truncated: 3,332 more rows]

## Sheet: S3
Supplementary Table 3. List of differentially expressed genes between GC and MG in the spleen of RIKEN data
ensembl id	symbol	logFC	PValue	FDR	DEG
ENSMUSG00000001555	Fkbp10	0.757981	2.15e-05	0.00875272	Up
ENSMUSG00000004151	Etv1	0.930275	1.68e-05	0.0073454	Up
ENSMUSG00000005800	Mmp8	1.59209	2.06e-05	0.00855047	Up
ENSMUSG00000014329	Bicc1	0.613138	0.000160237	0.0405986	Up
ENSMUSG00000016458	Wt1	0.659612	3.72e-06	0.00243102	Up
ENSMUSG00000016529	Il10	2.02403	4.8e-05	0.0172003	Up
ENSMUSG00000017697	Ada	0.521302	0.000209055	0.0499992	Up
ENSMUSG00000018927	Ccl6	0.639993	0.000156359	0.0397976	Up
ENSMUSG00000021559	Dapk1	0.59877	8.24e-07	0.000686123	Up
ENSMUSG00000021798	Ldb3	1.00292	8.18e-05	0.0245252	Up
ENSMUSG00000022122	Ednrb	0.954712	1.48e-05	0.00669092	Up
ENSMUSG00000022651	Retnlg	1.46761	3.9e-06	0.00251329	Up
ENSMUSG00000022838	Eaf2	1.07147	6.32e-06	0.00350638	Up
ENSMUSG00000022893	Adamts1	0.741635	5.04e-05	0.017921	Up
ENSMUSG00000024087	Cyp1b1	0.662705	1.59e-06	0.0011898	Up
ENSMUSG00000026358	Rgs1	1.15153	8.42e-06	0.00429979	Up
ENSMUSG00000026390	Marco	0.846004	5.09e-05	0.0180049	Up
ENSMUSG00000026950	Neb	1.21443	1.1e-17	6.1e-14	Up
ENSMUSG00000027322	Siglec1	0.543953	6.35e-05	0.0208491	Up
ENSMUSG00000027875	Hmgcs2	0.952659	2.53e-05	0.0101764	Up
ENSMUSG00000028217	Cdh17	0.772643	7.45e-05	0.0229649	Up
ENSMUSG00000028373	Astn2	0.71643	6.87e-07	0.000619134	Up
ENSMUSG00000029092	D5Ertd615e	1.32397	0.000106353	0.0302629	Up
ENSMUSG00000029757	Dync1i1	1.51153	1.14e-05	0.00535555	Up
ENSMUSG00000030249	Abcc9	0.513127	3.03e-05	0.0113651	Up
ENSMUSG00000030772	Dkk3	0.730304	0.000106899	0.0302629	Up
ENSMUSG00000031517	Gpm6a	1.74668	2.61e-07	0.000278315	Up
ENSMUSG00000032511	Scn5a	0.893776	5.21e-06	0.0030093	Up
ENSMUSG00000033863	Klf9	0.780045	0.000192568	0.0464567	Up
ENSMUSG00000036856	Wnt4	0.702466	0.000190188	0.0460827	Up
ENSMUSG00000037016	Frem2	0.971172	2.91e-05	0.0112606	Up
ENSMUSG00000039032	Tsga13	1.20289	2.65e-05	0.0104178	Up
ENSMUSG00000040852	Plekhh2	0.577304	4.91e-06	0.00292303	Up
ENSMUSG00000041828	Abca8a	0.656449	1.14e-05	0.00535555	Up
ENSMUSG00000044337	Ackr3	0.730157	7.28e-06	0.0038083	Up
ENSMUSG00000045838	A430105I19Rik	0.54914	4.18e-05	0.0151422	Up
ENSMUSG00000049580	Tsku	0.824011	2.76e-06	0.00186891	Up
ENSMUSG00000049872	Fam26e	1.05431	6.86e-06	0.00362778	Up
ENSMUSG00000050666	Vstm4	0.679742	0.000141622	0.0377883	Up
ENSMUSG00000051497	Kcnj16	0.751145	4.95e-06	0.00292303	Up
ENSMUSG00000052353	Cemip	0.569171	0.000154338	0.0395858	Up
ENSMUSG00000054580	Pla2r1	0.65301	1.48e-05	0.00669092	Up
ENSMUSG00000056054	S100a8	1.20049	6.67e-08	8.22e-05	Up
ENSMUSG00000057722	Lepr	0.724413	1.05e-05	0.00520012	Up
ENSMUSG00000059430	Actg2	0.967094	1.97e-05	0.00826583	Up
ENSMUSG00000063739	Gm4963	1.96704	5.71e-06	0.00326487	Up
ENSMUSG00000064080	Fbln2	1.32739	1.78e-05	0.00758598	Up
ENSMUSG00000065987	Cd209b	0.772468	3.41e-06	0.00224978	Up
ENSMUSG00000073418	C4b	0.605602	7.94e-06	0.00411555	Up
ENSMUSG00000076532	Igkv4-91	1.41127	1.1e-05	0.00535372	Up
ENSMUSG00000076604	Igkj1	1.23258	6.74e-07	0.000619134	Up
ENSMUSG00000076680	Ighv6-6	1.00364	7.83e-05	0.0237377	Up
ENSMUSG00000078877	Gm14295	1.23551	0.000161994	0.0407012	Up
ENSMUSG00000079105	C7	1.31349	1.74e-06	0.00128013	Up
ENSMUSG00000081650	Gm16181	1.44325	0.000181913	0.0448615	Up
ENSMUSG00000094088	Ighv1-64	0.991835	4.43e-06	0.00266956	Up
ENSMUSG00000094344	Gm11942	1.19343	2.66e-07	0.000278315	Up
ENSMUSG00000094420	Igkv10-96	0.906256	4.2e-06	0.00259233	Up
ENSMUSG00000094951	Ighv5-6	1.90729	1.09e-05	0.00535115	Up
ENSMUSG00000095127	Ighv1-82	1.38828	1.52e-05	0.00673574	Up
ENSMUSG00000095565	Ighv2-9-1	2.07911	2.04e-05	0.00851789	Up
ENSMUSG00000095612	Ighv5-4	1.10209	9.29e-09	1.25e-05	Up
ENSMUSG00000096326	Ighv1-78	2.36783	7.74e-07	0.000671286	Up
ENSMUSG00000098235	Gm7497	1.3884	6.57e-06	0.00354325	Up
ENSMUSG00000102184	Gm37192	1.16646	0.000173372	0.0429459	Up
ENSMUSG00000103793	Pcdhga6	0.957527	2.2e-06	0.00152363	Up
ENSMUSG00000104466	Gm10513	1.51185	0.000154813	0.0395858	Up
ENSMUSG00000105366	Gm43719	0.959887	6.67e-05	0.0213403	Up
ENSMUSG00000105909	Gm43189	1.45869	4.4e-07	0.000436414	Up
ENSMUSG00000107134	Gm42528	0.898333	6.3e-05	0.0208167	Up
ENSMUSG00000107369	Gstm2-ps1	1.15153	0.000104941	0.0302629	Up
ENSMUSG00000112895	Gm47567	0.861495	3.73e-05	0.0137236	Up
ENSMUSG00000118383	ENSMUSG00000118383	1.33382	4.35e-06	0.00265522	Up
ENSMUSG00000118410	ENSMUSG00000118410	2.27404	5.15e-07	0.000492584	Up
ENSMUSG00000001763	Tspan33	-0.88411	1.72e-05	0.00746955	Down
ENSMUSG00000005483	Dnajb1	-0.583552	2.99e-05	0.0113412	Down
ENSMUSG00000006574	Slc4a1	-4.39112	7.88e-36	4.37e-31	Down
ENSMUSG00000007659	Bcl2l1	-0.751878	6.41e-05	0.0209281	Down
ENSMUSG00000018677	Slc25a39	-0.519135	0.000162843	0.0407012	Down
ENSMUSG00000020641	Rsad2	-2.01909	2.58e-12	5.52e-09	Down
ENSMUSG00000020802	Ube2o	-1.08274	9.24e-10	1.51e-06	Down
ENSMUSG00000021061	Sptb	-1.89574	2.21e-11	4.23e-08	Down
ENSMUSG00000021792	Fam213a	-0.929965	8.61e-07	0.000692049	Down
ENSMUSG00000022099	Dmtn	-1.26182	1.85e-07	0.000209506	Down
ENSMUSG00000022742	Cpox	-0.598951	7.6e-05	0.0232914	Down
ENSMUSG00000022797	Tfrc	-0.695969	0.000106691	0.0302629	Down
ENSMUSG00000023132	Gzma	-0.960375	9.34e-05	0.0274171	Down
ENSMUSG00000023216	Epb42	-3.00798	4.53e-09	6.73e-06	Down
ENSMUSG00000023926	Rhag	-2.65794	1.4e-09	2.22e-06	Down
ENSMUSG00000023995	Tspo2	-3.05079	5.64e-09	8.03e-06	Down
ENSMUSG00000024211	Grm8	-1.46828	1.05e-05	0.00520012	Down
ENSMUSG00000024588	Fech	-0.9699	9.13e-07	0.000723952	Down
ENSMUSG00000025175	Fn3k	-1.78531	1.29e-05	0.00592897	Down
ENSMUSG00000025270	Alas2	-2.41096	1.37e-18	1.09e-14	Down
ENSMUSG00000025889	Snca	-2.56573	3.02e-15	1.2e-11	Down
ENSMUSG00000026027	Stradb	-0.501096	6.69e-05	0.0213403	Down
ENSMUSG00000026532	Spta1	-4.22854	5.21e-28	7.22e-24	Down
ENSMUSG00000026815	Gfi1b	-1.45278	0.00011897	0.0332599	Down
ENSMUSG00000027078	Ube2l6	-1.54007	2.17e-13	6.33e-10	Down
ENSMUSG00000027463	Slc52a3	-1.25898	0.000126574	0.0349413	Down
ENSMUSG00000027562	Car2	-2.30242	5.07e-11	9.08e-08	Down
ENSMUSG00000028124	Gclm	-0.467474	0.000136477	0.0369257	Down
ENSMUSG00000028328	Tmod1	-1.23233	5.96e-05	0.0201732	Down
ENSMUSG00000028332	Hemgn	-4.05036	1.88e-12	4.18e-09	Down
ENSMUSG00000028410	Dnaja1	-0.629947	0.000184795	0.0453703	Down
ENSMUSG00000028436	Dcaf12	-0.484956	1.12e-05	0.00535555	Down
ENSMUSG00000028644	Ermap	-2.85276	2.55e-11	4.72e-08	Down
ENSMUSG00000028717	Tal1	-0.948505	0.000135878	0.0369257	Down
ENSMUSG00000028825	Rhd	-2.21884	3.25e-13	9.03e-10	Down
ENSMUSG00000028906	Epb41	-0.790354	6.72e-06	0.00358368	Down
ENSMUSG00000029005	Draxin	-0.738321	1.05e-05	0.00520012	Down
ENSMUSG00000029716	Tfr2	-1.75506	1.2e-05	0.00561646	Down
ENSMUSG00000029866	Kel	-3.86115	5.87e-11	1.02e-07	Down
ENSMUSG00000029922	Mkrn1	-0.675999	2.63e-05	0.0104178	Down
ENSMUSG00000030000	Add2	-4.97662	7.97e-16	3.69e-12	Down
ENSMUSG00000030878	Cdr2	-1.62305	3.33e-14	1.15e-10	Down
ENSMUSG00000031162	Gata1	-1.53778	2.12e-05	0.00870933	Down
ENSMUSG00000031543	Ank1	-3.39677	1.77e-15	7.57e-12	Down
ENSMUSG00000031877	Ces2g	-1.95339	5.85e-05	0.0199253	Down
ENSMUSG00000032126	Hmbs	-0.925699	1.84e-07	0.000209506	Down
ENSMUSG00000032131	Abcg4	-1.89446	4.1e-07	0.000413709	Down
ENSMUSG00000034449	Dhrs11	-0.925044	4.79e-07	0.000465939	Down
ENSMUSG00000038224	Serpinf2	-1.83753	5.45e-05	0.0186713	Down
ENSMUSG00000038871	Bpgm	-1.91699	4.99e-14	1.63e-10	Down
ENSMUSG00000039236	Isg20	-0.786806	8.65e-05	0.0257993	Down
ENSMUSG00000041237	Pklr	-1.66706	0.000190039	0.0460827	Down
ENSMUSG00000042066	Tmcc2	-0.763164	7.66e-07	0.000671286	Down
ENSMUSG00000042331	Specc1	-1.01726	3.51e-08	4.42e-05	Down
ENSMUSG00000044309	Apol7c	-0.611971	8.45e-06	0.00429979	Down
ENSMUSG00000044468	Fam46c	-1.35964	1.75e-06	0.00128013	Down
ENSMUSG00000046179	E2f8	-0.78686	2.48e-05	0.010027	Down
ENSMUSG00000047821	Trim16	-1.47513	5.14e-05	0.0180621	Down
ENSMUSG00000050762	Prss27	-1.91737	0.000142192	0.0377883	Down
ENSMUSG00000051279	Gdf6	-0.940796	8.28e-07	0.000686123	Down
ENSMUSG00000051839	Gypa	-3.26435	2.47e-07	0.000268212	Down
ENSMUSG00000051910	Sox6	-1.87006	4.61e-09	6.73e-06	Down
ENSMUSG00000052305	Hbb-bs	-2.1189	1.38e-13	4.25e-10	Down
ENSMUSG00000054191	Klf1	-2.31464	3.52e-07	0.00036178	Down
ENSMUSG00000065637	Gm26397	-0.692748	8.83e-05	0.0260585	Down
ENSMUSG00000069917	Hba-a2	-3.196	1.32e-33	3.67e-29	Down
ENSMUSG00000069919	Hba-a1	-2.39464	1.18e-12	2.73e-09	Down
ENSMUSG00000070868	Skint3	-0.981212	7.82e-05	0.0237377	Down
ENSMUSG00000072589	Gm10371	-1.93919	2.57e-06	0.00175797	Down
ENSMUSG00000073400	Trim10	-4.21175	1.1e-19	1.01e-15	Down
ENSMUSG00000073940	Hbb-bt	-2.98333	7.47e-15	2.76e-11	Down
ENSMUSG00000074491	Clec4g	-0.670033	9.55e-05	0.0278948	Down
ENSMUSG00000079557	43161	-0.532047	2.94e-05	0.0112606	Down
ENSMUSG00000080440	Gm25848	-1.6932	2.57e-05	0.0102442	Down
ENSMUSG00000082101	Slfn14	-3.96421	7.11e-23	7.89e-19	Down
ENSMUSG00000091191	Gm17334	-0.654415	6.22e-06	0.00348891	Down
ENSMUSG00000091694	Apol11b	-4.29452	5.8e-31	1.07e-26	Down
ENSMUSG00000094134	Ighv5-15	-4.47111	1.28e-06	0.000999165	Down
ENSMUSG00000098318	Lockd	-0.927364	0.000127626	0.0350574	Down
ENSMUSG00000117818	ENSMUSG00000117818	-1.19118	6.08e-05	0.0203355	Down

## Sheet: S4
Supplementary Table 4. List of differentially expressed genes between GC and MG in the lymph node of RIKEN data
ensembl id	symbol	logFC	PValue	FDR	DEG
ENSMUSG00000001768	Rin2	0.602398	9.14e-09	3.62e-05	Up
ENSMUSG00000001773	Folh1	2.42158	5.09e-10	4.04e-06	Up
ENSMUSG00000001865	Cpa3	0.990129	4.35e-07	0.000602973	Up
ENSMUSG00000002265	Peg3	1.44352	2.11e-07	0.000345098	Up
ENSMUSG00000002289	Angptl4	2.48007	3.25e-09	1.57e-05	Up
ENSMUSG00000002602	Axl	0.546714	1.64e-05	0.0070297	Up
ENSMUSG00000002944	Cd36	0.616074	0.00013145	0.0272156	Up
ENSMUSG00000003617	Cp	0.57626	0.000267922	0.0443655	Up
ENSMUSG00000004151	Etv1	1.12879	5.15e-06	0.00343181	Up
ENSMUSG00000004730	Adgre1	0.696909	4.37e-05	0.0133945	Up
ENSMUSG00000005339	Fcer1a	1.66894	1.01e-07	0.000193975	Up
ENSMUSG00000006235	Epor	1.30889	7.37e-05	0.0189108	Up
ENSMUSG00000009378	Slc16a12	1.28659	1.05e-09	6.49e-06	Up
ENSMUSG00000010721	Lmbr1	0.63335	0.000168665	0.0331869	Up
ENSMUSG00000011008	Mcoln2	0.476723	1.88e-05	0.00753965	Up
ENSMUSG00000014846	Tppp3	0.949434	7.54e-06	0.00431568	Up
ENSMUSG00000015224	Cyp2j9	1.1069	3.51e-05	0.0115223	Up
ENSMUSG00000016487	Ppfibp1	0.551695	5.92e-06	0.00377841	Up
ENSMUSG00000017754	Pltp	0.496827	8.83e-05	0.0210379	Up
ENSMUSG00000017978	Cadps2	0.88252	1.49e-05	0.00668401	Up
ENSMUSG00000018417	Myo1b	0.580908	2.87e-06	0.00234012	Up
ENSMUSG00000018428	Akap1	0.708491	5.15e-05	0.0149124	Up
ENSMUSG00000018845	Unc45b	0.689054	3.46e-05	0.0114385	Up
ENSMUSG00000019577	Pdk4	1.87564	0.000162796	0.0322609	Up
ENSMUSG00000019647	Sema6a	0.743993	1.01e-06	0.00109486	Up
ENSMUSG00000019970	Sgk1	0.450822	0.000204289	0.0375343	Up
ENSMUSG00000019987	Arg1	0.947042	0.000265875	0.0443022	Up
ENSMUSG00000019990	Pde7b	1.05162	1.95e-07	0.000327806	Up
ENSMUSG00000020427	Igfbp3	0.721216	9.58e-05	0.022239	Up
ENSMUSG00000020432	Tcn2	0.689134	5.24e-07	0.000675591	Up
ENSMUSG00000020653	Klf11	1.01626	1.1e-05	0.00542862	Up
ENSMUSG00000020723	Cacng4	2.09427	3.11e-05	0.0105613	Up
ENSMUSG00000020787	P2rx1	2.08084	2.79e-06	0.00234012	Up
ENSMUSG00000020841	Cpd	0.43563	0.000100398	0.0232116	Up
ENSMUSG00000021190	Lgmn	0.641954	1.12e-08	3.88e-05	Up
ENSMUSG00000021879	Dnah12	2.04128	1.74e-05	0.00721206	Up
ENSMUSG00000021903	Galnt15	0.927359	1.47e-05	0.00665061	Up
ENSMUSG00000021922	Itih4	1.59277	4.73e-10	4.04e-06	Up
ENSMUSG00000022122	Ednrb	1.20797	1.88e-13	5.22e-09	Up
ENSMUSG00000022123	Scel	1.22216	9.32e-06	0.00519208	Up
ENSMUSG00000022146	Osmr	0.548755	1.42e-06	0.00146384	Up
ENSMUSG00000022225	Cma1	1.42432	1e-08	3.7e-05	Up
ENSMUSG00000022246	Rai14	0.516356	0.000158882	0.0317118	Up
ENSMUSG00000022425	Enpp2	0.544994	6.61e-07	0.000814521	Up
ENSMUSG00000022548	Apod	1.08623	9.55e-06	0.00519208	Up
ENSMUSG00000022788	Fgd4	0.547902	0.000128233	0.0270146	Up
ENSMUSG00000024087	Cyp1b1	0.843446	4.86e-05	0.0141811	Up
ENSMUSG00000024112	Cacna1h	0.885963	0.000151112	0.0303795	Up
ENSMUSG00000024173	Tpsab1	1.58243	2.05e-06	0.00186053	Up
ENSMUSG00000024743	Syt7	1.45651	9.76e-06	0.00519208	Up
ENSMUSG00000024810	Il33	0.65003	0.000109376	0.0247407	Up
ENSMUSG00000025044	Msr1	1.0002	1.52e-05	0.00671278	Up
ENSMUSG00000025255	Zfhx4	0.637945	0.000134504	0.0275198	Up
ENSMUSG00000025993	Slc40a1	0.984103	1.13e-06	0.00120743	Up
ENSMUSG00000026069	Il1rl1	1.12224	1.41e-10	1.56e-06	Up
ENSMUSG00000026131	Dst	0.373705	0.000179612	0.0344278	Up
ENSMUSG00000026177	Slc11a1	0.631443	1.47e-05	0.00665061	Up
ENSMUSG00000026390	Marco	1.05752	0.000288277	0.0465925	Up
ENSMUSG00000026587	Astn1	0.75245	0.000204267	0.0375343	Up
ENSMUSG00000026874	Hc	0.969604	2.94e-05	0.010328	Up
ENSMUSG00000026950	Neb	0.924921	7.28e-05	0.0188882	Up
ENSMUSG00000027002	Nckap1	0.415671	0.000179219	0.0344278	Up
ENSMUSG00000027074	Slc43a3	0.615416	6.98e-05	0.0184499	Up
ENSMUSG00000027210	Meis2	0.618212	8.61e-05	0.0205953	Up
ENSMUSG00000027799	Nbea	0.591571	2.34e-06	0.00205912	Up
ENSMUSG00000027875	Hmgcs2	1.30692	9.64e-08	0.000193975	Up
ENSMUSG00000027962	Vcam1	0.616939	0.000247497	0.0423855	Up
ENSMUSG00000028207	Asph	0.532692	6.37e-05	0.0175738	Up
ENSMUSG00000028262	Clca3a2	2.30657	9.7e-07	0.00107689	Up
ENSMUSG00000028713	Cyp4b1	0.888635	9.04e-05	0.0213624	Up
ENSMUSG00000028883	Sema3a	1.19769	7.41e-08	0.000158141	Up
ENSMUSG00000028980	H6pd	0.459142	0.000174946	0.0340605	Up
ENSMUSG00000029096	Htra3	0.787738	1.32e-05	0.00618612	Up
ENSMUSG00000029108	Pcdh7	0.626773	5.19e-06	0.00343181	Up
ENSMUSG00000029231	Pdgfra	0.508507	0.000282394	0.0460859	Up
ENSMUSG00000029381	Shroom3	0.947717	0.00027577	0.0452711	Up
ENSMUSG00000029816	Gpnmb	0.975721	6.48e-05	0.0176158	Up
ENSMUSG00000029838	Ptn	1.03055	7.19e-06	0.00425583	Up
ENSMUSG00000030022	Adamts9	0.789544	3.81e-06	0.00274516	Up
ENSMUSG00000030064	Frmd4b	0.574332	0.000128185	0.0270146	Up
ENSMUSG00000030159	Clec1b	0.93126	3.81e-07	0.000541534	Up
ENSMUSG00000030787	Lyve1	1.16179	2.72e-09	1.51e-05	Up
ENSMUSG00000031012	Cask	0.494837	0.000144403	0.0292135	Up
ENSMUSG00000031214	Ophn1	0.741112	3.18e-05	0.0106934	Up
ENSMUSG00000031385	Plxnb3	1.55538	0.000228257	0.0409879	Up
ENSMUSG00000031434	Morc4	1.14885	3.2e-08	7.4e-05	Up
ENSMUSG00000031734	Irx3	0.962846	0.000263311	0.0441067	Up
ENSMUSG00000031765	Mt1	0.673097	0.000202383	0.0374321	Up
ENSMUSG00000032036	Kirrel3	0.869819	2.94e-05	0.010328	Up
ENSMUSG00000032216	Nedd4	0.372185	1.94e-05	0.00772597	Up
ENSMUSG00000032554	Trf	0.494057	0.000263907	0.0441067	Up
ENSMUSG00000032625	Thsd7a	0.519624	0.000128399	0.0270146	Up
ENSMUSG00000033308	Dpyd	0.706785	4.51e-05	0.0137449	Up
ENSMUSG00000033777	Tlr13	0.67338	1.81e-06	0.00169975	Up
ENSMUSG00000034557	Zfyve9	0.475546	0.000160252	0.0318706	Up
ENSMUSG00000034652	Cd300a	0.703831	5.13e-06	0.00343181	Up
ENSMUSG00000034845	Plvap	0.497745	0.000168411	0.0331869	Up
ENSMUSG00000035873	Pawr	0.624854	0.000124505	0.0268614	Up
ENSMUSG00000036887	C1qa	0.43994	0.00023837	0.0416684	Up
ENSMUSG00000036905	C1qb	0.525372	0.000120719	0.0268038	Up
ENSMUSG00000036907	C1ql2	2.55823	1.51e-06	0.00150802	Up
ENSMUSG00000036928	Stag3	1.494	0.000171884	0.0337008	Up
ENSMUSG00000037820	Tgm2	0.676516	5.97e-07	0.000752441	Up
ENSMUSG00000038296	Galnt18	1.02589	6.13e-11	8.5e-07	Up
ENSMUSG00000038371	Sbf2	0.403587	0.000107913	0.0246409	Up
ENSMUSG00000039706	Ldb2	0.648478	2.27e-05	0.00880425	Up
ENSMUSG00000039831	Arhgap29	0.424735	1.57e-05	0.00679543	Up
ENSMUSG00000040046	Tph1	1.94021	1.67e-06	0.00162679	Up
ENSMUSG00000040254	Sema3d	0.687581	1.85e-05	0.00747821	Up
ENSMUSG00000040809	Chil3	2.14884	3.21e-05	0.0107134	Up
ENSMUSG00000041444	Arhgap32	0.568248	0.000152204	0.0304885	Up
ENSMUSG00000041567	Serpina12	1.85136	4.79e-05	0.0140714	Up
ENSMUSG00000041741	Pde3a	0.596425	3.77e-05	0.0118919	Up
ENSMUSG00000041992	Rapgef5	0.536415	0.000227832	0.0409879	Up
ENSMUSG00000042050	Wdr60	0.760045	7.95e-05	0.0196281	Up
ENSMUSG00000042684	Npl	0.801784	0.000183372	0.034608	Up
ENSMUSG00000044499	Hs3st5	1.47709	6.56e-05	0.0176158	Up
ENSMUSG00000044534	Ackr2	0.904367	0.00025577	0.043268	Up
ENSMUSG00000044903	Psg22	2.55257	1.77e-08	5.44e-05	Up
ENSMUSG00000045215	Asxl3	0.810885	1.37e-05	0.00633209	Up
ENSMUSG00000045629	Sh3tc2	1.23787	1.56e-05	0.00679543	Up
ENSMUSG00000045954	Cavin2	0.770794	1.84e-05	0.00747821	Up
ENSMUSG00000046186	Cd109	1.78755	0.0001964	0.0366924	Up
ENSMUSG00000046318	Ccbe1	1.29601	6.55e-09	2.8e-05	Up
ENSMUSG00000046387	Pcdhb17	0.800533	0.00020642	0.0378007	Up
ENSMUSG00000046618	Olfml2a	0.750945	0.000233355	0.0415783	Up
ENSMUSG00000046768	Rhoj	0.52667	0.000213656	0.0388693	Up
ENSMUSG00000047907	Tshz2	0.698507	3.1e-05	0.0105613	Up
ENSMUSG00000049037	Clec4a1	0.951849	1.52e-05	0.00671278	Up
ENSMUSG00000049130	C5ar1	1.71203	6.27e-05	0.0174085	Up
ENSMUSG00000050530	Fam171a1	0.848112	0.000182891	0.034608	Up
ENSMUSG00000050730	Arhgap42	0.552091	7.07e-05	0.0184927	Up
ENSMUSG00000050967	Creg2	1.42174	2.75e-08	6.93e-05	Up
ENSMUSG00000051379	Flrt3	0.725734	0.000251849	0.042998	Up
ENSMUSG00000052353	Cemip	1.02148	3.63e-05	0.0117736	Up
ENSMUSG00000052698	Tln2	0.794317	3.77e-06	0.00274516	Up
ENSMUSG00000052861	Dnah6	1.11544	7.41e-06	0.00428354	Up
ENSMUSG00000052942	Glis3	0.857279	1e-05	0.00519208	Up
ENSMUSG00000053004	Hrh1	1.10236	0.000314496	0.0496109	Up
ENSMUSG00000053916	Nanp	1.95512	7.86e-07	0.000927983	Up
ENSMUSG00000054641	Mmrn1	1.00626	1.71e-05	0.00716421	Up
ENSMUSG00000056025	Clca3a1	0.88906	0.000116167	0.0260962	Up
ENSMUSG00000056492	Adgrf5	0.515811	3.79e-07	0.000541534	Up
ENSMUSG00000056596	Trnp1	1.92199	0.000133544	0.0275198	Up
ENSMUSG00000057604	Lmcd1	1.76106	2e-06	0.00184975	Up
ENSMUSG00000057722	Lepr	0.713525	2.31e-05	0.00883072	Up
ENSMUSG00000057969	Sema3b	0.684699	9.88e-06	0.00519208	Up
ENSMUSG00000058135	Gstm1	0.522506	7.65e-05	0.0192986	Up
ENSMUSG00000058254	Tspan7	0.621388	3.73e-05	0.0118919	Up
ENSMUSG00000058396	Gpr182	0.846651	1.81e-07	0.000313475	Up
ENSMUSG00000059173	Pde1a	0.80025	7.79e-05	0.0195461	Up
ENSMUSG00000060961	Slc4a4	1.01109	2.52e-07	0.00039939	Up
ENSMUSG00000061068	Mcpt4	1.22433	1.33e-05	0.00618612	Up
ENSMUSG00000061535	C1qtnf7	0.805593	0.000239579	0.0416707	Up
ENSMUSG00000062098	Btbd3	0.575044	5.01e-07	0.000662088	Up
ENSMUSG00000062960	Kdr	0.473995	9.46e-05	0.02214	Up
ENSMUSG00000065987	Cd209b	0.856814	3.06e-06	0.00242529	Up
ENSMUSG00000066842	Hmcn1	0.582013	6.02e-05	0.0170285	Up
ENSMUSG00000067377	Tspan6	1.02285	7.4e-05	0.0189108	Up
ENSMUSG00000068036	Afdn	0.48171	7.91e-05	0.0196281	Up
ENSMUSG00000069292	Vmn1r199	2.03077	2.73e-06	0.00233301	Up
ENSMUSG00000070547	Mrgprb1	1.26234	1.24e-07	0.000229717	Up
ENSMUSG00000074622	Mafb	0.536685	6.14e-05	0.0172264	Up
ENSMUSG00000075324	Fign	1.53953	3.4e-09	1.57e-05	Up
ENSMUSG00000076525	Igkv1-99	2.02089	3.57e-05	0.0116578	Up
ENSMUSG00000076564	Igkv12-46	1.38364	9.55e-07	0.00107689	Up
ENSMUSG00000076676	Ighv12-3	1.92441	1.24e-05	0.0059294	Up
ENSMUSG00000078190	Dnm3os	0.570005	0.00024032	0.0416707	Up
ENSMUSG00000081151	Gm11448	1.82667	3.86e-05	0.0119791	Up
ENSMUSG00000081264	Gm14021	1.64004	3.73e-05	0.0118919	Up
ENSMUSG00000082301	Gm14032	1.67756	2.64e-06	0.00229142	Up
ENSMUSG00000086008	Gm8817	1.04364	0.000270716	0.0445733	Up
ENSMUSG00000087333	Gm13652	2.11762	4.69e-06	0.00329493	Up
ENSMUSG00000089775	Gm16270	0.846212	0.000307531	0.0488179	Up
ENSMUSG00000089982	Gm7568	1.85095	4.78e-05	0.0140714	Up
ENSMUSG00000090698	Apold1	1.7301	9.87e-08	0.000193975	Up
ENSMUSG00000091307	Gm8895	2.55213	2.48e-05	0.00920823	Up
ENSMUSG00000091577	Gm6211	2.52583	4.84e-06	0.00335632	Up
ENSMUSG00000094420	Igkv10-96	1.12522	8.31e-05	0.0201079	Up
ENSMUSG00000094491	Igkv1-133	2.95686	1.26e-05	0.00596191	Up
ENSMUSG00000094787	Ighv1-54	3.76577	0.000181315	0.0345254	Up
ENSMUSG00000094797	Igkv6-15	1.63714	1.72e-05	0.00716421	Up
ENSMUSG00000094898	Vmn1r201	1.2688	0.000283591	0.0461455	Up
ENSMUSG00000095197	Ighv1-59	2.83577	4.19e-05	0.0129298	Up
ENSMUSG00000095981	Ighv10-1	0.943532	2.73e-05	0.00971522	Up
ENSMUSG00000096326	Ighv1-78	1.54031	1.16e-06	0.00121139	Up
ENSMUSG00000097086	Gm7672	1.40884	4.62e-05	0.0138622	Up
ENSMUSG00000097585	E230029C05Rik	1.14156	9.11e-07	0.00105299	Up
ENSMUSG00000102752	Gm7694	0.808328	7.1e-05	0.0184927	Up
ENSMUSG00000103492	Gm37412	1.35424	2.97e-05	0.0103494	Up
ENSMUSG00000104892	Gm6615	1.4365	0.000129727	0.0270858	Up
ENSMUSG00000105041	Gm42676	1.6029	0.000244866	0.0420646	Up
ENSMUSG00000105909	Gm43189	1.76963	2.35e-05	0.00890144	Up
ENSMUSG00000106139	Gm30648	2.26471	7.21e-06	0.00425583	Up
ENSMUSG00000108906	Gm8314	2.03616	2.73e-05	0.00971522	Up
ENSMUSG00000109841	E330011O21Rik	1.88529	3.31e-06	0.00255094	Up
ENSMUSG00000111965	Gm4797	1.79565	1.11e-05	0.00542862	Up
ENSMUSG00000112020	Gm48532	1.40845	8.05e-05	0.0197648	Up
ENSMUSG00000114019	Gm47155	1.62985	6.52e-05	0.0176158	Up
ENSMUSG00000114291	Gm47471	1.57492	0.000105426	0.0242373	Up
ENSMUSG00000114828	AI463229	2.34827	2.29e-05	0.00883072	Up
ENSMUSG00000115975	AC158556.2	1.25386	1.75e-07	0.000313475	Up
ENSMUSG00000117313	ENSMUSG00000117313	0.928403	0.000120155	0.0268038	Up
ENSMUSG00000000303	Cdh1	-0.919469	6.79e-06	0.00418597	Down
ENSMUSG00000001248	Gramd1a	-0.438305	0.000314723	0.0496109	Down
ENSMUSG00000005124	Wisp1	-1.82182	2.88e-08	6.94e-05	Down
ENSMUSG00000005483	Dnajb1	-0.570507	2.08e-05	0.00815256	Down
ENSMUSG00000005493	Msh4	-1.24762	0.000233792	0.0415783	Down
ENSMUSG00000020017	Hal	-1.53547	7.29e-06	0.00426024	Down
ENSMUSG00000020940	1700023F06Rik	-1.2726	8.2e-05	0.0200173	Down
ENSMUSG00000023927	Satb1	-0.320386	0.000137918	0.0280318	Down
ENSMUSG00000024669	Cd5	-0.553402	0.00019853	0.0368423	Down
ENSMUSG00000027985	Lef1	-0.471738	9.9e-06	0.00519208	Down
ENSMUSG00000028410	Dnaja1	-0.540413	9.43e-05	0.02214	Down
ENSMUSG00000029530	Ccr9	-0.584646	3.56e-06	0.00266991	Down
ENSMUSG00000029544	Cabp1	-1.51162	9.52e-05	0.0221926	Down
ENSMUSG00000029657	Hsph1	-0.891014	0.000127312	0.0270146	Down
ENSMUSG00000030699	Tbx6	-0.569654	9.05e-05	0.0213624	Down
ENSMUSG00000031893	Tsnaxip1	-1.71404	2.46e-05	0.00920823	Down
ENSMUSG00000034171	Faah	-0.449668	3.65e-05	0.0117853	Down
ENSMUSG00000039323	Igfbp2	-1.36437	6.23e-05	0.0173578	Down
ENSMUSG00000041073	Nacad	-0.525631	0.000236951	0.0416684	Down
ENSMUSG00000042349	Ikbke	-0.603675	2.67e-08	6.93e-05	Down
ENSMUSG00000045903	Npas4	-1.83184	1.78e-05	0.00732684	Down
ENSMUSG00000046408	1700067K01Rik	-1.15838	7.96e-05	0.0196281	Down
ENSMUSG00000049555	Tmie	-0.7742	2.59e-07	0.000399849	Down
ENSMUSG00000050052	Tdrp	-0.777402	1.99e-08	5.51e-05	Down
ENSMUSG00000053588	A730061H03Rik	-1.71005	1e-05	0.00519208	Down
ENSMUSG00000064590	Gm22301	-1.52724	0.000241928	0.0418189	Down
ENSMUSG00000072612	Gm10382	-1.35878	2.49e-05	0.00920823	Down
ENSMUSG00000073478	D730003I15Rik	-0.729138	1.12e-05	0.00542862	Down
ENSMUSG00000076652	Ighv7-3	-3.65297	3.63e-06	0.00268383	Down
ENSMUSG00000076910	Traj19	-1.01241	0.000178794	0.0344278	Down
ENSMUSG00000079179	Rab10os	-0.424707	0.000316144	0.0496936	Down
ENSMUSG00000081758	Gm11460	-0.996872	0.000120848	0.0268038	Down
ENSMUSG00000085028	Slc2a4rg-ps	-0.480298	6.25e-06	0.00393899	Down
ENSMUSG00000085742	Gm13536	-1.5024	0.000121968	0.0268038	Down
ENSMUSG00000086395	A630014C17Rik	-0.803522	1.09e-05	0.00542862	Down
ENSMUSG00000086915	Gm16365	-0.825806	0.000261658	0.0441067	Down
ENSMUSG00000086953	Aknaos	-0.563605	5.19e-05	0.0149124	Down
ENSMUSG00000087434	Rab11fip4os1	-1.39272	0.00018169	0.0345254	Down
ENSMUSG00000087442	Gm14453	-0.650324	0.000186143	0.0350119	Down
ENSMUSG00000091575	2010016I18Rik	-0.358499	0.000287141	0.0465866	Down
ENSMUSG00000091754	Gm3636	-2.16188	0.000267812	0.0443655	Down
ENSMUSG00000095298	Gm12407	-2.89501	3.75e-19	2.08e-14	Down
ENSMUSG00000096935	1700113A16Rik	-1.01106	0.000198456	0.0368423	Down
ENSMUSG00000097149	G630030J09Rik	-0.941625	5.37e-08	0.000119223	Down
ENSMUSG00000097291	Gm18828	-0.840221	0.000210751	0.0384669	Down
ENSMUSG00000097564	C430014B12Rik	-1.87229	0.000288857	0.0465925	Down
ENSMUSG00000097569	Gm26640	-1.46241	3.45e-13	6.37e-09	Down
ENSMUSG00000097842	9330104G04Rik	-0.774765	4.56e-06	0.0032421	Down
ENSMUSG00000102744	5830444F18Rik	-0.565718	0.000179935	0.0344278	Down
ENSMUSG00000102929	Gm37154	-0.975019	0.000237302	0.0416684	Down
ENSMUSG00000103532	Gm4430	-1.93112	5.92e-06	0.00377841	Down
ENSMUSG00000103774	Gm36932	-0.628503	1.52e-06	0.00150802	Down
ENSMUSG00000103883	Gm37010	-0.642428	8.33e-05	0.0201079	Down
ENSMUSG00000104612	Gm42449	-0.659535	8.6e-05	0.0205953	Down
ENSMUSG00000107591	Gm6794	-1.8283	9.39e-06	0.00519208	Down
ENSMUSG00000108037	Gm44597	-0.90242	3.12e-05	0.0105613	Down
ENSMUSG00000108132	Gm44175	-0.463646	5.39e-05	0.015405	Down
ENSMUSG00000108402	9430064I24Rik	-1.65784	1.43e-05	0.00654009	Down
ENSMUSG00000108601	Gm44645	-1.41446	3.03e-05	0.0104993	Down
ENSMUSG00000111082	Gm30934	-1.1428	7.03e-06	0.00425583	Down
ENSMUSG00000111690	Gm48720	-0.849721	2.91e-06	0.00234012	Down
ENSMUSG00000115681	AC140209.1	-0.42105	7.09e-06	0.00425583	Down
ENSMUSG00000115926	AL592187.1	-1.0806	3.09e-05	0.0105613	Down
ENSMUSG00000116438	AL592187.7	-0.876089	4.79e-05	0.0140714	Down
ENSMUSG00000116957	ENSMUSG00000116957	-1.07843	4.69e-05	0.0140053	Down
ENSMUSG00000118078	ENSMUSG00000118078	-1.45476	3.81e-05	0.0119357	Down
ENSMUSG00000118239	ENSMUSG00000118239	-0.639072	0.000109687	0.0247407	Down
ENSMUSG00000118485	ENSMUSG00000118485	-1.40842	2.63e-05	0.00960132	Down

## Sheet: S5
Supplementary Table 5. List of differentially intron retention loci between GC and MG in the thymus of RIKEN data
Locus (ensembl id)	Locus (ensemble id)	ensembl id	symbol	Pvalue	FDR	IncLevel	IR
ENSMUSG00000108414,chr19:8725827-8726065	Snhg1,chr19:8725827-8726065	ENSMUSG00000108414	Snhg1	0.0201657	0.0802835	-0.308	IncIR
ENSMUSG00000024965,chr19:7001882-7002211	Fermt3,chr19:7001882-7002211	ENSMUSG00000024965	Fermt3	0	0	-0.741	IncIR
ENSMUSG00000024948,chr19:6346126-6346207	Map4k2,chr19:6346126-6346207	ENSMUSG00000024948	Map4k2	6.98088e-09	2.9571e-07	-0.484	IncIR
ENSMUSG00000024941,chr19:5758861-5758938	Scyl1,chr19:5758861-5758938	ENSMUSG00000024941	Scyl1	0.0195588	0.0796834	-0.189	IncIR
ENSMUSG00000024908,chr19:3484917-3486974	Ppp6r3,chr19:3484917-3486974	ENSMUSG00000024908	Ppp6r3	0.00168306	0.0133012	-0.196	IncIR
ENSMUSG00000024287,chr18:9986356-9986551	Thoc1,chr18:9986356-9986551	ENSMUSG00000024287	Thoc1	0.000738995	0.00680518	-0.273	IncIR
ENSMUSG00000024097,chr17:80204388-80205260	Srsf7,chr17:80204388-80205260	ENSMUSG00000024097	Srsf7	0.0120196	0.0551027	-0.333	IncIR
ENSMUSG00000007603,chr17:56768151-56768346	Dus3l,chr17:56768151-56768346	ENSMUSG00000007603	Dus3l	8.40546e-06	0.000121937	-0.39	IncIR
ENSMUSG00000042625,chr17:56563244-56563360	Safb2,chr17:56563244-56563360	ENSMUSG00000042625	Safb2	0.00278434	0.0199231	-0.156	IncIR
ENSMUSG00000035929,chr17:35380174-35380359	H2-Q4,chr17:35380174-35380359	ENSMUSG00000035929	H2-Q4	0.00898171	0.0455102	-0.16	IncIR
ENSMUSG00000007029,chr17:35011695-35011806	Vars,chr17:35011695-35011806	ENSMUSG00000007029	Vars	0.00190788	0.0147478	-0.565	IncIR
ENSMUSG00000007029,chr17:35013748-35013826	Vars,chr17:35013748-35013826	ENSMUSG00000007029	Vars	0.0133678	0.0594809	-0.267	IncIR
ENSMUSG00000024335,chr17:34114178-34114348	Brd2,chr17:34114178-34114348	ENSMUSG00000024335	Brd2	0.000910607	0.00817231	-0.301	IncIR
ENSMUSG00000024160,chr17:24890756-24890831	Spsb3,chr17:24890756-24890831	ENSMUSG00000024160	Spsb3	0.000293786	0.00296304	-0.267	IncIR
ENSMUSG00000022884,chr16:23110724-23111124	Eif4a2,chr16:23110724-23111124	ENSMUSG00000022884	Eif4a2	2.9976e-15	5.29077e-13	-0.861	IncIR
ENSMUSG00000022710,chr16:8697995-8698450	Usp7,chr16:8697995-8698450	ENSMUSG00000022710	Usp7	0.00989419	0.0485468	-0.438	IncIR
ENSMUSG00000022475,chr15:97800803-97802074	Hdac7,chr15:97800803-97802074	ENSMUSG00000022475	Hdac7	0.00355463	0.023825	-0.252	IncIR
ENSMUSG00000022469,chr15:97748671-97749494	Rapgef3,chr15:97748671-97749494	ENSMUSG00000022469	Rapgef3	0.00168108	0.0133012	-0.183	IncIR
ENSMUSG00000022463,chr15:82170155-82171100	Srebf2,chr15:82170155-82171100	ENSMUSG00000022463	Srebf2	1.01645e-06	2.03099e-05	-0.47	IncIR
ENSMUSG00000055024,chr15:81639892-81639993	Ep300,chr15:81639892-81639993	ENSMUSG00000055024	Ep300	6.21725e-15	9.40581e-13	-0.9	IncIR
ENSMUSG00000022443,chr15:77791147-77791714	Myh9,chr15:77791147-77791714	ENSMUSG00000022443	Myh9	0.00287174	0.0202745	-0.318	IncIR
ENSMUSG00000022587,chr15:74957878-74958267	Ly6e,chr15:74957878-74958267	ENSMUSG00000022587	Ly6e	0.00188476	0.0146762	-0.054	IncIR
ENSMUSG00000072501,chr15:66629982-66630865	Phf20l1,chr15:66629982-66630865	ENSMUSG00000072501	Phf20l1	0.00953315	0.0474129	-0.254	IncIR
ENSMUSG00000002625,chr17:32334697-32335561	Akap8l,chr17:32334697-32335561	ENSMUSG00000002625	Akap8l	0.0252704	0.0942301	-0.145	IncIR
ENSMUSG00000021134,chr12:80947595-80947794	Srsf5,chr12:80947595-80947794	ENSMUSG00000021134	Srsf5	9.17044e-14	1.07906e-11	-0.834	IncIR
ENSMUSG00000028034,chr3:152214068-152215590	Fubp1,chr3:152214068-152215590	ENSMUSG00000028034	Fubp1	0.00345965	0.0233361	-0.248	IncIR
ENSMUSG00000006179,chr13:22003072-22003144	Prss16,chr13:22003072-22003144	ENSMUSG00000006179	Prss16	0.0477989	0.156462	-0.308	IncIR
ENSMUSG00000052142,chr17:32392204-32392396	Rasal3,chr17:32392204-32392396	ENSMUSG00000052142	Rasal3	9.33535e-08	3.40901e-06	-0.329	IncIR
ENSMUSG00000040033,chr10:128285084-128285270	Stat2,chr10:128285084-128285270	ENSMUSG00000040033	Stat2	0.0165221	0.0694324	-0.292	IncIR
ENSMUSG00000029730,chr5:138169474-138169558	Mcm7,chr5:138169474-138169558	ENSMUSG00000029730	Mcm7	0.00751212	0.0406206	-0.321	IncIR
ENSMUSG00000040472,chr14:55719346-55719428	Rabggta,chr14:55719346-55719428	ENSMUSG00000040472	Rabggta	0.00283204	0.0201284	-0.556	IncIR
ENSMUSG00000037174,chr3:51265007-51266751	Elf2,chr3:51265007-51266751	ENSMUSG00000037174	Elf2	7.30357e-07	1.5469e-05	-0.387	IncIR
ENSMUSG00000058569,chr13:55593358-55593499	Tmed9,chr13:55593358-55593499	ENSMUSG00000058569	Tmed9	0.019696	0.0799161	-0.33	IncIR
ENSMUSG00000032299,chr9:57155983-57156170	Commd4,chr9:57155983-57156170	ENSMUSG00000032299	Commd4	0.0210842	0.081442	-0.286	IncIR
ENSMUSG00000057948,chr11:116069938-116070019	Unc13d,chr11:116069938-116070019	ENSMUSG00000057948	Unc13d	0.0134588	0.0596353	-0.314	IncIR
ENSMUSG00000033589,chr14:70547007-70547113	Reep4,chr14:70547007-70547113	ENSMUSG00000033589	Reep4	6.02661e-09	2.65924e-07	-0.474	IncIR
ENSMUSG00000029148,chr5:31250141-31250228	Nrbp1,chr5:31250141-31250228	ENSMUSG00000029148	Nrbp1	0.0050264	0.0304169	-0.45	IncIR
ENSMUSG00000041264,chr5:149213523-149214021	Uspl1,chr5:149213523-149214021	ENSMUSG00000041264	Uspl1	4.87675e-07	1.17374e-05	-0.345	IncIR
ENSMUSG00000033364,chr1:74468385-74470535	Usp37,chr1:74468385-74470535	ENSMUSG00000033364	Usp37	0.0204225	0.0804601	-0.286	IncIR
ENSMUSG00000031532,chr8:34167858-34168455	Saraf,chr8:34167858-34168455	ENSMUSG00000031532	Saraf	0.00577138	0.0337673	-0.455	IncIR
ENSMUSG00000005262,chr16:18826303-18827016	Ufd1,chr16:18826303-18827016	ENSMUSG00000005262	Ufd1	0.00135791	0.0114129	-0.407	IncIR
ENSMUSG00000053841,chr4:129631355-129631589	Txlna,chr4:129631355-129631589	ENSMUSG00000053841	Txlna	0.0378425	0.129245	-0.074	IncIR
ENSMUSG00000040928,chr4:129182101-129182330	S100pbp,chr4:129182101-129182330	ENSMUSG00000040928	S100pbp	0.00358818	0.0238987	-0.123	IncIR
ENSMUSG00000028907,chr4:124679813-124682191	Utp11,chr4:124679813-124682191	ENSMUSG00000028907	Utp11	0.0408649	0.137384	-0.279	IncIR
ENSMUSG00000029385,chr5:93271045-93271199	Ccng2,chr5:93271045-93271199	ENSMUSG00000029385	Ccng2	0.0379558	0.129245	-0.356	IncIR
ENSMUSG00000031065,chrX:20696837-20696920	Cdk16,chrX:20696837-20696920	ENSMUSG00000031065	Cdk16	0.0287888	0.105119	-0.278	IncIR
ENSMUSG00000013858,chr10:79978321-79978390	Tmem259,chr10:79978321-79978390	ENSMUSG00000013858	Tmem259	0.0138397	0.0608142	-0.281	IncIR
ENSMUSG00000042524,chr15:79728085-79728414	Sun2,chr15:79728085-79728414	ENSMUSG00000042524	Sun2	0.0292967	0.105119	-0.196	IncIR
ENSMUSG00000020640,chr12:4712037-4712465	Itsn2,chr12:4712037-4712465	ENSMUSG00000020640	Itsn2	0.0101783	0.0488992	-0.317	IncIR
ENSMUSG00000030057,chr6:87845321-87845463	Cnbp,chr6:87845321-87845463	ENSMUSG00000030057	Cnbp	0.0092537	0.0466651	-0.094	IncIR
ENSMUSG00000030057,chr6:87845558-87845654	Cnbp,chr6:87845558-87845654	ENSMUSG00000030057	Cnbp	0.00544902	0.0324186	-0.273	IncIR
ENSMUSG00000062908,chr3:153938967-153939068	Acadm,chr3:153938967-153939068	ENSMUSG00000062908	Acadm	0.0161467	0.0686722	-0.311	IncIR
ENSMUSG00000019338,chr3:95008493-95008583	Zfp687,chr3:95008493-95008583	ENSMUSG00000019338	Zfp687	0.000443468	0.00430855	-0.381	IncIR
ENSMUSG00000041354,chr17:33932219-33932319	Rgl2,chr17:33932219-33932319	ENSMUSG00000041354	Rgl2	0.0293817	0.105119	-0.222	IncIR
ENSMUSG00000028104,chr3:96579912-96580014	Polr3gl,chr3:96579912-96580014	ENSMUSG00000028104	Polr3gl	0.0168845	0.0703962	-0.25	IncIR
ENSMUSG00000027936,chr3:90257219-90257293	Crtc2,chr3:90257219-90257293	ENSMUSG00000027936	Crtc2	0.000126033	0.00136192	-0.508	IncIR
ENSMUSG00000027937,chr3:90232233-90232427	Jtb,chr3:90232233-90232427	ENSMUSG00000027937	Jtb	0.00650176	0.036725	-0.232	IncIR
ENSMUSG00000030035,chr6:83120288-83120770	Wbp1,chr6:83120288-83120770	ENSMUSG00000030035	Wbp1	0.00715679	0.0394742	-0.229	IncIR
ENSMUSG00000015291,chrX:74309176-74309961	Gdi1,chrX:74309176-74309961	ENSMUSG00000015291	Gdi1	0.00413882	0.0264037	-0.246	IncIR
ENSMUSG00000047617,chr2:25459860-25460007	Paxx,chr2:25459860-25460007	ENSMUSG00000047617	Paxx	0.0144683	0.0625588	-0.296	IncIR
ENSMUSG00000059796,chr11:69668549-69668642	Eif4a1,chr11:69668549-69668642	ENSMUSG00000059796	Eif4a1	0.00273538	0.0197936	-0.244	IncIR
ENSMUSG00000027423,chr2:144254813-144254901	Snx5,chr2:144254813-144254901	ENSMUSG00000027423	Snx5	0.0431024	0.143089	-0.581	IncIR
ENSMUSG00000023942,chr17:45589549-45589679	Slc29a1,chr17:45589549-45589679	ENSMUSG00000023942	Slc29a1	0.00253068	0.0184827	-0.366	IncIR
ENSMUSG00000017754,chr2:164852537-164852615	Pltp,chr2:164852537-164852615	ENSMUSG00000017754	Pltp	0.0100224	0.0488992	-0.306	IncIR
ENSMUSG00000078619,chr11:106265038-106265181	Smarcd2,chr11:106265038-106265181	ENSMUSG00000078619	Smarcd2	0.0131431	0.0587278	-0.397	IncIR
ENSMUSG00000006498,chr10:79859523-79859600	Ptbp1,chr10:79859523-79859600	ENSMUSG00000006498	Ptbp1	0.0217737	0.082821	-0.066	IncIR
ENSMUSG00000018433,chr11:107180119-107180911	Nol11,chr11:107180119-107180911	ENSMUSG00000018433	Nol11	0.00715412	0.0394742	-0.275	IncIR
ENSMUSG00000062963,chr1:171289595-171289882	Ufc1,chr1:171289595-171289882	ENSMUSG00000062963	Ufc1	3.8593e-05	0.00046977	-0.427	IncIR
ENSMUSG00000027406,chr2:130284037-130284169	Idh3b,chr2:130284037-130284169	ENSMUSG00000027406	Idh3b	0.0103995	0.0493859	-0.261	IncIR
ENSMUSG00000037318,chr1:193194550-193194823	Traf3ip3,chr1:193194550-193194823	ENSMUSG00000037318	Traf3ip3	0.0224821	0.0850305	-0.352	IncIR
ENSMUSG00000026176,chr1:74393427-74393795	Ctdsp1,chr1:74393427-74393795	ENSMUSG00000026176	Ctdsp1	0.00411168	0.0263895	-0.314	IncIR
ENSMUSG00000029034,chr4:155888110-155888182	Ints11,chr4:155888110-155888182	ENSMUSG00000029034	Ints11	1.25801e-06	2.42225e-05	-0.42	IncIR
ENSMUSG00000053332,chr1:161036015-161036206	Gas5,chr1:161036015-161036206	ENSMUSG00000053332	Gas5	1.05406e-07	3.72082e-06	-0.507	IncIR
ENSMUSG00000004264,chr6:124714169-124714828	Phb2,chr6:124714169-124714828	ENSMUSG00000004264	Phb2	0.0265706	0.0980426	-0.303	IncIR
ENSMUSG00000024404,chr18:12135968-12136691	Riok3,chr18:12135968-12136691	ENSMUSG00000024404	Riok3	0.0365552	0.126924	-0.193	IncIR
ENSMUSG00000012848,chr7:12925866-12926394	Rps5,chr7:12925866-12926394	ENSMUSG00000012848	Rps5	0.00102075	0.00893961	-0.383	IncIR
ENSMUSG00000009640,chr4:117676136-117676348	Dmap1,chr4:117676136-117676348	ENSMUSG00000009640	Dmap1	0.0187925	0.0771368	-0.487	IncIR
ENSMUSG00000031167,chrX:8143948-8144571	Rbm3,chrX:8143948-8144571	ENSMUSG00000031167	Rbm3	0.00117097	0.0101644	-0.222	IncIR
ENSMUSG00000017686,chr11:80242120-80242571	Rhot1,chr11:80242120-80242571	ENSMUSG00000017686	Rhot1	0.0197743	0.0799272	-0.308	IncIR
ENSMUSG00000080268,chr19:5046730-5046813	Brms1,chr19:5046730-5046813	ENSMUSG00000080268	Brms1	0.0286974	0.105119	-0.278	IncIR
ENSMUSG00000024045,chr17:32316668-32317065	Akap8,chr17:32316668-32317065	ENSMUSG00000024045	Akap8	0.0393638	0.13361	-0.297	IncIR
ENSMUSG00000005687,chr3:103175670-103177337	Bcas2,chr3:103175670-103177337	ENSMUSG00000005687	Bcas2	0.0195634	0.0796834	-0.267	IncIR
ENSMUSG00000005625,chr3:95033765-95033907	Psmd4,chr3:95033765-95033907	ENSMUSG00000005625	Psmd4	0.0129577	0.0581448	-0.333	IncIR
ENSMUSG00000037761,chr2:158635427-158636006	Actr5,chr2:158635427-158636006	ENSMUSG00000037761	Actr5	3.34712e-06	5.37061e-05	-0.517	IncIR
ENSMUSG00000027330,chr2:131192689-131193066	Cdc25b,chr2:131192689-131193066	ENSMUSG00000027330	Cdc25b	2.93211e-10	1.55255e-08	-0.766	IncIR
ENSMUSG00000024835,chr19:4149545-4149861	Coro1b,chr19:4149545-4149861	ENSMUSG00000024835	Coro1b	0.025612	0.0951689	-0.208	IncIR
ENSMUSG00000024835,chr19:4150220-4150438	Coro1b,chr19:4150220-4150438	ENSMUSG00000024835	Coro1b	0.00219204	0.0163477	-0.402	IncIR
ENSMUSG00000063108,chr9:20444368-20444892	Zfp26,chr9:20444368-20444892	ENSMUSG00000063108	Zfp26	2.03337e-06	3.53007e-05	-0.325	IncIR
ENSMUSG00000027569,chr2:180583523-180584404	Mrgbp,chr2:180583523-180584404	ENSMUSG00000027569	Mrgbp	1.38666e-06	2.62227e-05	-0.357	IncIR
ENSMUSG00000029713,chr5:137529910-137530182	Gnb2,chr5:137529910-137530182	ENSMUSG00000029713	Gnb2	0.00433763	0.0271046	-0.31	IncIR
ENSMUSG00000035086,chr11:101295625-101296256	Becn1,chr11:101295625-101296256	ENSMUSG00000035086	Becn1	0.00593517	0.0345349	-0.263	IncIR
ENSMUSG00000028521,chr4:103213958-103214057	Slc35d1,chr4:103213958-103214057	ENSMUSG00000028521	Slc35d1	0.00313981	0.0215913	-0.222	IncIR
ENSMUSG00000030530,chr7:80397251-80397896	Furin,chr7:80397251-80397896	ENSMUSG00000030530	Furin	0.0205113	0.0804601	-0.286	IncIR
ENSMUSG00000026860,chr2:30345940-30346351	Sh3glb2,chr2:30345940-30346351	ENSMUSG00000026860	Sh3glb2	0.0317152	0.11286	-0.063	IncIR
ENSMUSG00000003437,chr7:28395540-28395627	Paf1,chr7:28395540-28395627	ENSMUSG00000003437	Paf1	0.0418049	0.140099	-0.356	IncIR
ENSMUSG00000021748,chr14:8171531-8172762	Pdhb,chr14:8171531-8172762	ENSMUSG00000021748	Pdhb	2.02826e-07	5.80521e-06	-0.498	IncIR
ENSMUSG00000017760,chr2:164834209-164834318	Ctsa,chr2:164834209-164834318	ENSMUSG00000017760	Ctsa	0.00195973	0.0149306	-0.18	IncIR
ENSMUSG00000027365,chr2:126799235-126799311	Trpm7,chr2:126799235-126799311	ENSMUSG00000027365	Trpm7	0.00932103	0.0467819	-0.261	IncIR
ENSMUSG00000027245,chr2:121457702-121457990	Hypk,chr2:121457702-121457990	ENSMUSG00000027245	Hypk	7.04016e-07	1.52154e-05	-0.519	IncIR
ENSMUSG00000039231,chrX:8063826-8063909	Suv39h1,chrX:8063826-8063909	ENSMUSG00000039231	Suv39h1	3.65341e-05	0.00044988	-0.419	IncIR
ENSMUSG00000024560,chr18:74219239-74219381	Cxxc1,chr18:74219239-74219381	ENSMUSG00000024560	Cxxc1	0.014185	0.0618186	-0.281	IncIR
ENSMUSG00000029472,chr5:122791756-122791825	Anapc5,chr5:122791756-122791825	ENSMUSG00000029472	Anapc5	3.29652e-07	8.51466e-06	-0.497	IncIR
ENSMUSG00000007880,chr4:133695662-133695914	Arid1a,chr4:133695662-133695914	ENSMUSG00000007880	Arid1a	0.00130982	0.0111001	-0.406	IncIR
ENSMUSG00000006763,chr7:46699719-46701779	Saal1,chr7:46699719-46701779	ENSMUSG00000006763	Saal1	0.000182641	0.00193417	-0.5	IncIR
ENSMUSG00000059208,chr17:33666530-33666645	Hnrnpm,chr17:33666530-33666645	ENSMUSG00000059208	Hnrnpm	0.000127918	0.00136833	-0.282	IncIR
ENSMUSG00000035781,chr10:79911998-79912073	R3hdm4,chr10:79911998-79912073	ENSMUSG00000035781	R3hdm4	1.5347e-05	0.000207424	-0.43	IncIR
ENSMUSG00000039176,chr7:79452029-79452105	Polg,chr7:79452029-79452105	ENSMUSG00000039176	Polg	0.000106026	0.00119449	-0.207	IncIR
ENSMUSG00000032590,chr9:108092883-108092979	Apeh,chr9:108092883-108092979	ENSMUSG00000032590	Apeh	1.0818e-06	2.12152e-05	-0.655	IncIR
ENSMUSG00000027263,chr2:121189470-121189822	Tubgcp4,chr2:121189470-121189822	ENSMUSG00000027263	Tubgcp4	0.00167263	0.0133012	-0.198	IncIR
ENSMUSG00000001248,chr7:31134518-31135595	Gramd1a,chr7:31134518-31135595	ENSMUSG00000001248	Gramd1a	0.0402786	0.135844	-0.052	IncIR
ENSMUSG00000074578,chr2:167065218-167065432	Zfas1,chr2:167065218-167065432	ENSMUSG00000074578	Zfas1	0.0078628	0.0415696	-0.311	IncIR
ENSMUSG00000037400,chr3:35837590-35839047	Atp11b,chr3:35837590-35839047	ENSMUSG00000037400	Atp11b	3.4549e-12	3.04895e-10	-0.692	IncIR
ENSMUSG00000031505,chr8:11509373-11509451	Naxd,chr8:11509373-11509451	ENSMUSG00000031505	Naxd	0.0317586	0.11286	-0.064	IncIR
ENSMUSG00000004266,chr6:124720909-124721078	Ptpn6,chr6:124720909-124721078	ENSMUSG00000004266	Ptpn6	4.49529e-12	3.66193e-10	-0.701	IncIR
ENSMUSG00000030330,chr6:125047941-125048174	Ing4,chr6:125047941-125048174	ENSMUSG00000030330	Ing4	0.00650257	0.036725	-0.232	IncIR
ENSMUSG00000108037,chr6:125050053-125050432	Gm44597,chr6:125050053-125050432	ENSMUSG00000108037	Gm44597	0.00187859	0.0146762	-0.508	IncIR
ENSMUSG00000056919,chr9:87238385-87239813	Cep162,chr9:87238385-87239813	ENSMUSG00000056919	Cep162	0.0371839	0.128266	-0.175	IncIR
ENSMUSG00000029599,chr5:120626040-120626399	Ddx54,chr5:120626040-120626399	ENSMUSG00000029599	Ddx54	6.71196e-05	0.000798648	-0.327	IncIR
ENSMUSG00000032503,chr9:112155517-112157688	Arpp21,chr9:112155517-112157688	ENSMUSG00000032503	Arpp21	0.000745758	0.00680825	-0.09	IncIR
ENSMUSG00000029578,chr5:142658289-142659063	Wipi2,chr5:142658289-142659063	ENSMUSG00000029578	Wipi2	0.0498209	0.162339	-0.267	IncIR
ENSMUSG00000003099,chr7:17008713-17008991	Ppp5c,chr7:17008713-17008991	ENSMUSG00000003099	Ppp5c	0.000123454	0.00134781	-0.37	IncIR
ENSMUSG00000052488,chr8:72470016-72470088	Cherp,chr8:72470016-72470088	ENSMUSG00000052488	Cherp	1.67691e-05	0.00022198	-0.318	IncIR
ENSMUSG00000039001,chr2:180257684-180257786	Rps21,chr2:180257684-180257786	ENSMUSG00000039001	Rps21	0.00131021	0.0111001	-0.378	IncIR
ENSMUSG00000016933,chr2:160761195-160761303	Plcg1,chr2:160761195-160761303	ENSMUSG00000016933	Plcg1	0.0216781	0.082821	-0.642	IncIR
ENSMUSG00000038520,chr7:44842100-44842201	Tbc1d17,chr7:44842100-44842201	ENSMUSG00000038520	Tbc1d17	0.0201247	0.0802835	-0.175	IncIR
ENSMUSG00000002963,chr7:44858210-44858451	Pnkp,chr7:44858210-44858451	ENSMUSG00000002963	Pnkp	0.029057	0.105119	-0.278	IncIR
ENSMUSG00000038502,chr7:44863733-44864381	Ptov1,chr7:44863733-44864381	ENSMUSG00000038502	Ptov1	0.00448556	0.027779	-0.198	IncIR
ENSMUSG00000005150,chr8:85076133-85076215	Wdr83,chr8:85076133-85076215	ENSMUSG00000005150	Wdr83	1.35103e-05	0.000188256	-0.401	IncIR
ENSMUSG00000008690,chr15:89370489-89370599	Ncaph2,chr15:89370489-89370599	ENSMUSG00000008690	Ncaph2	0.0107101	0.0501857	-0.111	IncIR
ENSMUSG00000008690,chr15:89370809-89370890	Ncaph2,chr15:89370809-89370890	ENSMUSG00000008690	Ncaph2	1.90838e-06	3.3683e-05	-0.439	IncIR
ENSMUSG00000064127,chrX:12706446-12706530	Med14,chrX:12706446-12706530	ENSMUSG00000064127	Med14	0.0102046	0.0488992	-0.261	IncIR
ENSMUSG00000033685,chr7:100494376-100496724	Ucp2,chr7:100494376-100496724	ENSMUSG00000033685	Ucp2	0.00451348	0.0277894	-0.296	IncIR
ENSMUSG00000095567,chr4:156237518-156237598	Noc2l,chr4:156237518-156237598	ENSMUSG00000095567	Noc2l	0.0104462	0.0493865	-0.254	IncIR
ENSMUSG00000030890,chr7:105741484-105741578	Ilk,chr7:105741484-105741578	ENSMUSG00000030890	Ilk	2.33355e-07	6.50323e-06	-0.473	IncIR
ENSMUSG00000057193,chr9:21342867-21342962	Slc44a2,chr9:21342867-21342962	ENSMUSG00000057193	Slc44a2	0.00217611	0.016344	-0.214	IncIR
ENSMUSG00000030763,chr7:123421640-123422705	Lcmt1,chr7:123421640-123422705	ENSMUSG00000030763	Lcmt1	0.0100929	0.0488992	-0.211	IncIR
ENSMUSG00000040331,chr7:130533667-130533768	Nsmce4a,chr7:130533667-130533768	ENSMUSG00000040331	Nsmce4a	0.00724091	0.0397312	-0.291	IncIR
ENSMUSG00000066979,chr7:131561607-131563332	Bub3,chr7:131561607-131563332	ENSMUSG00000066979	Bub3	7.72403e-07	1.57303e-05	-0.523	IncIR
ENSMUSG00000015656,chr9:40802624-40802737	Hspa8,chr9:40802624-40802737	ENSMUSG00000015656	Hspa8	3.89763e-11	2.42799e-09	-0.697	IncIR
ENSMUSG00000040940,chr7:24912156-24912308	Arhgef1,chr7:24912156-24912308	ENSMUSG00000040940	Arhgef1	9.08661e-06	0.000130037	-0.356	IncIR
ENSMUSG00000040940,chr7:24923735-24923801	Arhgef1,chr7:24923735-24923801	ENSMUSG00000040940	Arhgef1	0.00146688	0.0120421	-0.483	IncIR
ENSMUSG00000019996,chr10:20273455-20273777	Map7,chr10:20273455-20273777	ENSMUSG00000019996	Map7	0.0292005	0.105119	-0.333	IncIR
ENSMUSG00000022536,chr16:5048787-5049804	Glyr1,chr16:5048787-5049804	ENSMUSG00000022536	Glyr1	0.00785765	0.0415696	-0.232	IncIR
ENSMUSG00000032480,chr9:110085879-110085948	Dhx30,chr9:110085879-110085948	ENSMUSG00000032480	Dhx30	1.63312e-09	7.51944e-08	-0.516	IncIR
ENSMUSG00000034917,chr10:81283606-81283681	Tjp3,chr10:81283606-81283681	ENSMUSG00000034917	Tjp3	0.0165221	0.0694324	-0.292	IncIR
ENSMUSG00000002395,chr8:71368878-71369130	Use1,chr8:71368878-71369130	ENSMUSG00000002395	Use1	0.00823037	0.0427253	-0.174	IncIR
ENSMUSG00000000088,chr9:57529073-57530239	Cox5a,chr9:57529073-57530239	ENSMUSG00000000088	Cox5a	4.20304e-10	2.11954e-08	-0.742	IncIR
ENSMUSG00000001524,chr17:35670746-35670864	Gtf2h4,chr17:35670746-35670864	ENSMUSG00000001524	Gtf2h4	0.00548559	0.0324538	-0.082	IncIR
ENSMUSG00000021957,chr14:30558839-30559750	Tkt,chr14:30558839-30559750	ENSMUSG00000021957	Tkt	0.00953631	0.0474129	-0.254	IncIR
ENSMUSG00000023977,chr17:46980419-46981352	Ubr2,chr17:46980419-46981352	ENSMUSG00000023977	Ubr2	0.00274756	0.0197936	-0.318	IncIR
ENSMUSG00000040345,chr10:127326652-127326871	Arhgap9,chr10:127326652-127326871	ENSMUSG00000040345	Arhgap9	5.71066e-07	1.34391e-05	-0.346	IncIR
ENSMUSG00000040345,chr10:127328148-127328388	Arhgap9,chr10:127328148-127328388	ENSMUSG00000040345	Arhgap9	0.0451648	0.148539	-0.301	IncIR
ENSMUSG00000010936,chr8:110710493-110711591	Vac14,chr8:110710493-110711591	ENSMUSG00000010936	Vac14	3.91461e-06	6.00808e-05	-0.432	IncIR
ENSMUSG00000000759,chr8:12624950-12625023	Tubgcp3,chr8:12624950-12625023	ENSMUSG00000000759	Tubgcp3	0.00226652	0.0166684	-0.365	IncIR
ENSMUSG00000004319,chr8:60923189-60927230	Clcn3,chr8:60923189-60927230	ENSMUSG00000004319	Clcn3	0.000196339	0.00203971	-0.472	IncIR
ENSMUSG00000005481,chr8:83721853-83722228	Ddx39,chr8:83721853-83722228	ENSMUSG00000005481	Ddx39	0.00473444	0.0289813	-0.398	IncIR
ENSMUSG00000036550,chr8:95772175-95773430	Cnot1,chr8:95772175-95773430	ENSMUSG00000036550	Cnot1	0.00576742	0.0337673	-0.307	IncIR
ENSMUSG00000052593,chr12:21329133-21330031	Adam17,chr12:21329133-21330031	ENSMUSG00000052593	Adam17	1.49815e-06	2.7834e-05	-0.605	IncIR
ENSMUSG00000032178,chr9:21398137-21399123	Ilf3,chr9:21398137-21399123	ENSMUSG00000032178	Ilf3	0.00890302	0.0453283	-0.267	IncIR
ENSMUSG00000071644,chr19:8969226-8969362	Eef1g,chr19:8969226-8969362	ENSMUSG00000071644	Eef1g	0.00860937	0.0442589	-0.301	IncIR
ENSMUSG00000016940,chr11:115429406-115430311	Kctd2,chr11:115429406-115430311	ENSMUSG00000016940	Kctd2	0.014473	0.0625588	-0.259	IncIR
ENSMUSG00000025722,chr7:80891910-80892974	Wdr73,chr7:80891910-80892974	ENSMUSG00000025722	Wdr73	0.0200088	0.0802627	-0.361	IncIR
ENSMUSG00000030037,chr6:83109427-83109520	Mrpl53,chr6:83109427-83109520	ENSMUSG00000030037	Mrpl53	1.96345e-05	0.000253573	-0.409	IncIR
ENSMUSG00000032553,chr9:103197621-103198787	Srprb,chr9:103197621-103198787	ENSMUSG00000032553	Srprb	0.0206629	0.0804601	-0.333	IncIR
ENSMUSG00000006676,chr9:108498037-108498121	Usp19,chr9:108498037-108498121	ENSMUSG00000006676	Usp19	7.3106e-12	5.25283e-10	-0.689	IncIR
ENSMUSG00000025651,chr9:108947480-108947596	Uqcrc1,chr9:108947480-108947596	ENSMUSG00000025651	Uqcrc1	8.58387e-05	0.000998936	-0.423	IncIR
ENSMUSG00000020477,chr11:5707410-5707485	Mrps24,chr11:5707410-5707485	ENSMUSG00000020477	Mrps24	1.54736e-05	0.000207424	-0.5	IncIR
ENSMUSG00000020385,chr11:51275579-51275768	Clk4,chr11:51275579-51275768	ENSMUSG00000020385	Clk4	0.0369838	0.127993	-0.175	IncIR
ENSMUSG00000001588,chr11:69884492-69884584	Acap1,chr11:69884492-69884584	ENSMUSG00000001588	Acap1	0.00670391	0.0375632	-0.122	IncIR
ENSMUSG00000040746,chr11:70650018-70650124	Rnf167,chr11:70650018-70650124	ENSMUSG00000040746	Rnf167	0.00311685	0.0215735	-0.222	IncIR
ENSMUSG00000020840,chr11:76950070-76951042	Blmh,chr11:76950070-76951042	ENSMUSG00000020840	Blmh	0.0206658	0.0804601	-0.333	IncIR
ENSMUSG00000017210,chr11:98705268-98705520	Med24,chr11:98705268-98705520	ENSMUSG00000017210	Med24	0.000387483	0.00383499	-0.657	IncIR
ENSMUSG00000025571,chr11:117749818-117752975	Tnrc6c,chr11:117749818-117752975	ENSMUSG00000025571	Tnrc6c	0.0442459	0.14597	-0.228	IncIR
ENSMUSG00000025583,chr11:119894384-119894917	Rptor,chr11:119894384-119894917	ENSMUSG00000025583	Rptor	6.41827e-07	1.41603e-05	-0.524	IncIR
ENSMUSG00000025142,chr11:120709000-120709069	Aspscr1,chr11:120709000-120709069	ENSMUSG00000025142	Aspscr1	0.0478695	0.156462	-0.089	IncIR
ENSMUSG00000035478,chr10:80393019-80393093	Mbd3,chr10:80393019-80393093	ENSMUSG00000035478	Mbd3	0.0176769	0.0731244	-0.203	IncIR
ENSMUSG00000034789,chr13:55320554-55320743	Rab24,chr13:55320554-55320743	ENSMUSG00000034789	Rab24	0.0184771	0.0761373	-0.1	IncIR
ENSMUSG00000034789,chr13:55321181-55321388	Rab24,chr13:55321181-55321388	ENSMUSG00000034789	Rab24	0.0110864	0.0512684	-0.254	IncIR
ENSMUSG00000026209,chr1:75315750-75315943	Dnpep,chr1:75315750-75315943	ENSMUSG00000026209	Dnpep	0.0198632	0.0799814	-0.308	IncIR
ENSMUSG00000025220,chr19:45777018-45778585	Oga,chr19:45777018-45778585	ENSMUSG00000025220	Oga	0.000108537	0.0012099	0.445	DecIR
ENSMUSG00000024661,chr19:9984328-9984558	Fth1,chr19:9984328-9984558	ENSMUSG00000024661	Fth1	0.00154071	0.012455	0.35	DecIR
ENSMUSG00000034616,chr19:4264461-4265101	Ssh3,chr19:4264461-4265101	ENSMUSG00000034616	Ssh3	0.0377085	0.129234	0.277	DecIR
ENSMUSG00000024454,chr18:37941111-37941377	Hdac3,chr18:37941111-37941377	ENSMUSG00000024454	Hdac3	1.9671e-10	1.0964e-08	0.889	DecIR
ENSMUSG00000024073,chr17:74618564-74619705	Birc6,chr17:74618564-74619705	ENSMUSG00000024073	Birc6	0.000536657	0.00512	0.528	DecIR
ENSMUSG00000024048,chr17:70996272-70996695	Myl12a,chr17:70996272-70996695	ENSMUSG00000024048	Myl12a	1.38746e-05	0.00019082	0.67	DecIR
ENSMUSG00000024338,chr17:34200271-34200709	Psmb8,chr17:34200271-34200709	ENSMUSG00000024338	Psmb8	1.23796e-07	4.21542e-06	0.553	DecIR
ENSMUSG00000024312,chr17:33941092-33941190	Wdr46,chr17:33941092-33941190	ENSMUSG00000024312	Wdr46	5.93577e-07	1.36652e-05	0.644	DecIR
ENSMUSG00000024042,chr17:31849082-31849517	Sik1,chr17:31849082-31849517	ENSMUSG00000024042	Sik1	2.14855e-06	3.66986e-05	0.442	DecIR
ENSMUSG00000037805,chr17:28329048-28329372	Rpl10a,chr17:28329048-28329372	ENSMUSG00000037805	Rpl10a	0.00383355	0.0250601	0.245	DecIR
ENSMUSG00000025733,chr17:25841668-25841755	Rhot2,chr17:25841668-25841755	ENSMUSG00000025733	Rhot2	0.0141354	0.0618186	0.281	DecIR
ENSMUSG00000024319,chr17:33962186-33962421	Vps52,chr17:33962186-33962421	ENSMUSG00000024319	Vps52	8.03839e-05	0.00094585	0.382	DecIR
ENSMUSG00000022884,chr16:23110154-23110232	Eif4a2,chr16:23110154-23110232	ENSMUSG00000022884	Eif4a2	3.988e-07	1.00555e-05	0.465	DecIR
ENSMUSG00000039637,chr16:4634682-4634760	Coro7,chr16:4634682-4634760	ENSMUSG00000039637	Coro7	0.00435108	0.0271046	0.214	DecIR
ENSMUSG00000022407,chr15:80963730-80963878	Adsl,chr15:80963730-80963878	ENSMUSG00000022407	Adsl	0.0203623	0.0804601	0.267	DecIR
ENSMUSG00000022552,chr15:76347388-76347480	Sharpin,chr15:76347388-76347480	ENSMUSG00000022552	Sharpin	0.0396508	0.134154	0.348	DecIR
ENSMUSG00000022570,chr15:75925663-75925791	Tsta3,chr15:75925663-75925791	ENSMUSG00000022570	Tsta3	0.0259456	0.0960712	0.238	DecIR
ENSMUSG00000010097,chr19:8765032-8766795	Nxf1,chr19:8765032-8766795	ENSMUSG00000010097	Nxf1	0.000321442	0.00321138	0.154	DecIR
ENSMUSG00000017843,chr12:110567856-110568952	Ppp2r5c,chr12:110567856-110568952	ENSMUSG00000017843	Ppp2r5c	0	0	0.914	DecIR
ENSMUSG00000021134,chr12:80947866-80949093	Srsf5,chr12:80947866-80949093	ENSMUSG00000021134	Srsf5	1.91383e-07	5.62985e-06	0.279	DecIR
ENSMUSG00000028034,chr3:152232023-152234522	Fubp1,chr3:152232023-152234522	ENSMUSG00000028034	Fubp1	0.000114537	0.00126349	0.158	DecIR
ENSMUSG00000029782,chr6:30506918-30508452	Tmem209,chr6:30506918-30508452	ENSMUSG00000029782	Tmem209	0.00368941	0.0242676	0.444	DecIR
ENSMUSG00000028114,chr3:123369691-123371273	Mettl14,chr3:123369691-123371273	ENSMUSG00000028114	Mettl14	0.0099019	0.0485468	0.185	DecIR
ENSMUSG00000066621,chr5:144217026-144217224	Tecpr1,chr5:144217026-144217224	ENSMUSG00000066621	Tecpr1	0.0103091	0.0491774	0.217	DecIR
ENSMUSG00000026034,chr1:58417180-58417265	Clk1,chr1:58417180-58417265	ENSMUSG00000026034	Clk1	3.25887e-06	5.30945e-05	0.367	DecIR
ENSMUSG00000029389,chr5:124554758-124556755	Ddx55,chr5:124554758-124556755	ENSMUSG00000029389	Ddx55	0.00100987	0.00893961	0.359	DecIR
ENSMUSG00000026048,chr1:44173580-44173910	Ercc5,chr1:44173580-44173910	ENSMUSG00000026048	Ercc5	0.00882163	0.045131	0.173	DecIR
ENSMUSG00000030180,chr6:120427873-120428216	Kdm5a,chr6:120427873-120428216	ENSMUSG00000030180	Kdm5a	0.00651965	0.036725	0.298	DecIR
ENSMUSG00000029148,chr5:31244289-31244456	Nrbp1,chr5:31244289-31244456	ENSMUSG00000029148	Nrbp1	0.0170529	0.0708195	0.275	DecIR
ENSMUSG00000007850,chr11:50379624-50379819	Hnrnph1,chr11:50379624-50379819	ENSMUSG00000007850	Hnrnph1	0.000811325	0.00734353	0.182	DecIR
ENSMUSG00000029071,chr4:155854801-155854884	Dvl1,chr4:155854801-155854884	ENSMUSG00000029071	Dvl1	0.000585102	0.00548339	0.321	DecIR
ENSMUSG00000028670,chr4:135969530-135969599	Lypla2,chr4:135969530-135969599	ENSMUSG00000028670	Lypla2	0.0108685	0.0507038	0.254	DecIR
ENSMUSG00000032596,chr9:107979459-107979542	Uba7,chr9:107979459-107979542	ENSMUSG00000032596	Uba7	0.00102143	0.00893961	0.174	DecIR
ENSMUSG00000032596,chr9:107981297-107981388	Uba7,chr9:107981297-107981388	ENSMUSG00000032596	Uba7	0.00290188	0.0203516	0.215	DecIR
ENSMUSG00000013858,chr10:79978476-79978546	Tmem259,chr10:79978476-79978546	ENSMUSG00000013858	Tmem259	0.0001008	0.00114782	0.27	DecIR
ENSMUSG00000042524,chr15:79728582-79729031	Sun2,chr15:79728582-79729031	ENSMUSG00000042524	Sun2	0.00398217	0.0257141	0.534	DecIR
ENSMUSG00000028248,chr4:21869616-21870350	Pnisr,chr4:21869616-21870350	ENSMUSG00000028248	Pnisr	0.00203461	0.0153904	0.122	DecIR
ENSMUSG00000028467,chr4:43570191-43570344	Gba2,chr4:43570191-43570344	ENSMUSG00000028467	Gba2	0.0292456	0.105119	0.175	DecIR
ENSMUSG00000039615,chr17:25831219-25831307	Stub1,chr17:25831219-25831307	ENSMUSG00000039615	Stub1	0.0338135	0.11911	0.159	DecIR
ENSMUSG00000028099,chr3:96723700-96723795	Polr3c,chr3:96723700-96723795	ENSMUSG00000028099	Polr3c	0.0205792	0.0804601	0.185	DecIR
ENSMUSG00000042156,chr14:118900043-118901499	Dzip1,chr14:118900043-118901499	ENSMUSG00000042156	Dzip1	7.6133e-07	1.57303e-05	0.783	DecIR
ENSMUSG00000059248,chr11:117356710-117359417	Septin9,chr11:117356710-117359417	ENSMUSG00000059248	Septin9	2.7587e-07	7.49093e-06	0.501	DecIR
ENSMUSG00000020048,chr10:86691749-86692138	Hsp90b1,chr10:86691749-86692138	ENSMUSG00000020048	Hsp90b1	0.000572002	0.00540848	0.391	DecIR
ENSMUSG00000029056,chr4:154979026-154979490	Pank4,chr4:154979026-154979490	ENSMUSG00000029056	Pank4	1.27378e-07	4.21542e-06	0.687	DecIR
ENSMUSG00000026987,chr2:59920539-59922141	Baz2b,chr2:59920539-59922141	ENSMUSG00000026987	Baz2b	5.94922e-05	0.000715935	0.354	DecIR
ENSMUSG00000031389,chrX:73900184-73900276	Arhgap4,chrX:73900184-73900276	ENSMUSG00000031389	Arhgap4	0.000285392	0.00290605	0.102	DecIR
ENSMUSG00000021728,chr13:117249465-117249699	Emb,chr13:117249465-117249699	ENSMUSG00000021728	Emb	0.00531976	0.0318284	0.471	DecIR
ENSMUSG00000026571,chr1:165338345-165339883	Dcaf6,chr1:165338345-165339883	ENSMUSG00000026571	Dcaf6	0.0036355	0.0240625	0.185	DecIR
ENSMUSG00000053332,chr1:161037165-161037286	Gas5,chr1:161037165-161037286	ENSMUSG00000053332	Gas5	0.0106221	0.0499948	0.293	DecIR
ENSMUSG00000042699,chr1:153464713-153464853	Dhx9,chr1:153464713-153464853	ENSMUSG00000042699	Dhx9	1.68687e-07	5.104e-06	0.439	DecIR
ENSMUSG00000024404,chr18:12136839-12136926	Riok3,chr18:12136839-12136926	ENSMUSG00000024404	Riok3	0.0109211	0.0507258	0.418	DecIR
ENSMUSG00000006005,chr1:150440199-150440437	Tpr,chr1:150440199-150440437	ENSMUSG00000006005	Tpr	1.3628e-07	4.37334e-06	0.58	DecIR
ENSMUSG00000006005,chr1:150447631-150449141	Tpr,chr1:150447631-150449141	ENSMUSG00000006005	Tpr	0.0125894	0.0572195	0.3	DecIR
ENSMUSG00000021901,chr14:31256792-31257287	Bap1,chr14:31256792-31257287	ENSMUSG00000021901	Bap1	0.0168628	0.0703962	0.292	DecIR
ENSMUSG00000063870,chr6:125120386-125120468	Chd4,chr6:125120386-125120468	ENSMUSG00000063870	Chd4	0.00426245	0.0268686	0.267	DecIR
ENSMUSG00000032316,chr9:57758351-57758625	Clk3,chr9:57758351-57758625	ENSMUSG00000032316	Clk3	0.000402571	0.00394743	0.126	DecIR
ENSMUSG00000036620,chr11:50231102-50231189	Mgat4b,chr11:50231102-50231189	ENSMUSG00000036620	Mgat4b	4.29864e-07	1.05866e-05	0.5	DecIR
ENSMUSG00000020134,chr11:21140694-21142554	Peli1,chr11:21140694-21142554	ENSMUSG00000020134	Peli1	3.11455e-07	8.24577e-06	0.438	DecIR
ENSMUSG00000042606,chr7:126862721-126862816	Hirip3,chr7:126862721-126862816	ENSMUSG00000042606	Hirip3	4.61207e-06	6.9774e-05	0.59	DecIR
ENSMUSG00000026972,chr2:24926195-24926270	Arrdc1,chr2:24926195-24926270	ENSMUSG00000026972	Arrdc1	4.85775e-06	7.24557e-05	0.381	DecIR
ENSMUSG00000041763,chr1:43951212-43953255	Tpp2,chr1:43951212-43953255	ENSMUSG00000041763	Tpp2	0.00959719	0.0474926	0.263	DecIR
ENSMUSG00000028656,chr4:122862747-122862899	Cap1,chr4:122862747-122862899	ENSMUSG00000028656	Cap1	0.00523837	0.0315195	0.463	DecIR
ENSMUSG00000028245,chr4:6417208-6417744	Nsmaf,chr4:6417208-6417744	ENSMUSG00000028245	Nsmaf	0.000502672	0.00483936	0.588	DecIR
ENSMUSG00000028245,chr4:6420141-6421055	Nsmaf,chr4:6420141-6421055	ENSMUSG00000028245	Nsmaf	0.00681412	0.0379797	0.278	DecIR
ENSMUSG00000034432,chr1:90604446-90605462	Cops8,chr1:90604446-90605462	ENSMUSG00000034432	Cops8	3.16934e-06	5.24426e-05	0.45	DecIR
ENSMUSG00000026193,chr1:71597388-71598372	Fn1,chr1:71597388-71598372	ENSMUSG00000026193	Fn1	2.29981e-05	0.000286529	0.502	DecIR
ENSMUSG00000030083,chr6:88840766-88840836	Abtb1,chr6:88840766-88840836	ENSMUSG00000030083	Abtb1	0.0240958	0.0901679	0.345	DecIR
ENSMUSG00000002833,chr17:56099076-56099175	Hdgfl2,chr17:56099076-56099175	ENSMUSG00000002833	Hdgfl2	0.0226669	0.0854245	0.53	DecIR
ENSMUSG00000021483,chr13:64437513-64437875	Cdk20,chr13:64437513-64437875	ENSMUSG00000021483	Cdk20	0.0125152	0.0571277	0.331	DecIR
ENSMUSG00000032185,chr9:21587586-21587849	Carm1,chr9:21587586-21587849	ENSMUSG00000032185	Carm1	2.7856e-08	1.05355e-06	0.481	DecIR
ENSMUSG00000068735,chr2:93198992-93199355	Trp53i11,chr2:93198992-93199355	ENSMUSG00000068735	Trp53i11	0.0435263	0.144045	0.299	DecIR
ENSMUSG00000021819,chr14:20718919-20718995	Zswim8,chr14:20718919-20718995	ENSMUSG00000021819	Zswim8	0.0147228	0.0633801	0.259	DecIR
ENSMUSG00000023944,chr17:45569127-45569238	Hsp90ab1,chr17:45569127-45569238	ENSMUSG00000023944	Hsp90ab1	0	0	0.92	DecIR
ENSMUSG00000027465,chr2:152308176-152308328	Tbc1d20,chr2:152308176-152308328	ENSMUSG00000027465	Tbc1d20	7.90073e-06	0.000116207	0.414	DecIR
ENSMUSG00000074643,chr2:156074036-156074174	Cpne1,chr2:156074036-156074174	ENSMUSG00000074643	Cpne1	0.0292041	0.105119	0.333	DecIR
ENSMUSG00000074643,chr2:156078824-156078898	Cpne1,chr2:156078824-156078898	ENSMUSG00000074643	Cpne1	7.53841e-14	9.97898e-12	0.81	DecIR
ENSMUSG00000054405,chr4:132544123-132544655	Dnajc8,chr4:132544123-132544655	ENSMUSG00000054405	Dnajc8	0.0208314	0.0808077	0.286	DecIR
ENSMUSG00000025369,chr10:128474410-128474681	Smarcc2,chr10:128474410-128474681	ENSMUSG00000025369	Smarcc2	1.11022e-16	2.35145e-14	0.788	DecIR
ENSMUSG00000000787,chrX:13287384-13287462	Ddx3x,chrX:13287384-13287462	ENSMUSG00000000787	Ddx3x	0.0101724	0.0488992	0.233	DecIR
ENSMUSG00000031601,chr8:40499440-40500750	Cnot7,chr8:40499440-40500750	ENSMUSG00000031601	Cnot7	0.0129268	0.0581448	0.333	DecIR
ENSMUSG00000011877,chr11:77503429-77503919	Git1,chr11:77503429-77503919	ENSMUSG00000011877	Git1	0.00812433	0.0424947	0.32	DecIR
ENSMUSG00000027366,chr2:126919741-126920316	Sppl2a,chr2:126919741-126920316	ENSMUSG00000027366	Sppl2a	1.928e-05	0.000252068	0.538	DecIR
ENSMUSG00000025138,chr11:120619050-120620161	Sirt7,chr11:120619050-120620161	ENSMUSG00000025138	Sirt7	0.00728025	0.0397411	0.296	DecIR
ENSMUSG00000025138,chr11:120620884-120620955	Sirt7,chr11:120620884-120620955	ENSMUSG00000025138	Sirt7	0.00788999	0.0415696	0.294	DecIR
ENSMUSG00000019087,chrX:74300772-74301322	Atp6ap1,chrX:74300772-74301322	ENSMUSG00000019087	Atp6ap1	0.0062374	0.0357049	0.276	DecIR
ENSMUSG00000017756,chr13:73784614-73785042	Slc12a7,chr13:73784614-73785042	ENSMUSG00000017756	Slc12a7	0.0339671	0.11911	0.335	DecIR
ENSMUSG00000030822,chr7:127473717-127473795	Prr14,chr7:127473717-127473795	ENSMUSG00000030822	Prr14	3.62381e-06	5.64356e-05	0.644	DecIR
ENSMUSG00000026107,chr1:51477617-51477823	Nabp1,chr1:51477617-51477823	ENSMUSG00000026107	Nabp1	0.000262329	0.00269714	0.082	DecIR
ENSMUSG00000097195,chr9:88521717-88521916	Snhg5,chr9:88521717-88521916	ENSMUSG00000097195	Snhg5	0.0164452	0.0694324	0.292	DecIR
ENSMUSG00000042726,chr5:121373475-121373945	Trafd1,chr5:121373475-121373945	ENSMUSG00000042726	Trafd1	0.0211775	0.081442	0.193	DecIR
ENSMUSG00000042726,chr5:121375247-121375794	Trafd1,chr5:121375247-121375794	ENSMUSG00000042726	Trafd1	0.0127232	0.0575805	0.211	DecIR
ENSMUSG00000010608,chr12:83660679-83663977	Rbm25,chr12:83660679-83663977	ENSMUSG00000010608	Rbm25	0.00344876	0.0233361	0.146	DecIR
ENSMUSG00000074578,chr2:167065481-167065685	Zfas1,chr2:167065481-167065685	ENSMUSG00000074578	Zfas1	0.0362661	0.126335	0.234	DecIR
ENSMUSG00000070034,chr1:85579200-85579642	Sp110,chr1:85579200-85579642	ENSMUSG00000070034	Sp110	0.00597954	0.0346029	0.138	DecIR
ENSMUSG00000004268,chr6:124705089-124705156	Emg1,chr6:124705089-124705156	ENSMUSG00000004268	Emg1	1.45715e-11	9.64448e-10	0.641	DecIR
ENSMUSG00000030330,chr6:125047588-125047791	Ing4,chr6:125047588-125047791	ENSMUSG00000030330	Ing4	0.00222697	0.0164921	0.139	DecIR
ENSMUSG00000004865,chr17:28599870-28600241	Srpk1,chr17:28599870-28600241	ENSMUSG00000004865	Srpk1	0.00141021	0.0116673	0.205	DecIR
ENSMUSG00000053907,chr6:72434396-72434979	Mat2a,chr6:72434396-72434979	ENSMUSG00000053907	Mat2a	0.0237155	0.0890593	0.065	DecIR
ENSMUSG00000006024,chr7:16113406-16113474	Napa,chr7:16113406-16113474	ENSMUSG00000006024	Napa	1.54409e-07	4.8094e-06	0.555	DecIR
ENSMUSG00000057177,chr7:25229573-25229849	Gsk3a,chr7:25229573-25229849	ENSMUSG00000057177	Gsk3a	0.00311361	0.0215735	0.211	DecIR
ENSMUSG00000031537,chr8:22665637-22665810	Ikbkb,chr8:22665637-22665810	ENSMUSG00000031537	Ikbkb	6.09823e-07	1.37405e-05	0.39	DecIR
ENSMUSG00000034218,chr9:53533773-53533863	Atm,chr9:53533773-53533863	ENSMUSG00000034218	Atm	0	0	0.952	DecIR
ENSMUSG00000030890,chr7:105740868-105740958	Ilk,chr7:105740868-105740958	ENSMUSG00000030890	Ilk	0.0325623	0.115329	0.096	DecIR
ENSMUSG00000030894,chr7:105752054-105752169	Tpp1,chr7:105752054-105752169	ENSMUSG00000030894	Tpp1	2.68167e-08	1.05181e-06	0.632	DecIR
ENSMUSG00000030751,chr7:114274128-114274414	Psma1,chr7:114274128-114274414	ENSMUSG00000030751	Psma1	1.07664e-09	5.18254e-08	0.644	DecIR
ENSMUSG00000000486,chr7:127217743-127217969	Septin1,chr7:127217743-127217969	ENSMUSG00000000486	Septin1	0.000196459	0.00203971	0.111	DecIR
ENSMUSG00000030846,chr7:128443947-128444279	Tial1,chr7:128443947-128444279	ENSMUSG00000030846	Tial1	9.80326e-06	0.000138422	0.318	DecIR
ENSMUSG00000068917,chr3:89169703-89170047	Clk2,chr3:89169703-89170047	ENSMUSG00000068917	Clk2	0.0157315	0.0674479	0.159	DecIR
ENSMUSG00000022295,chr15:38679412-38681065	Atp6v1c1,chr15:38679412-38681065	ENSMUSG00000022295	Atp6v1c1	7.47714e-09	3.0455e-07	0.667	DecIR
ENSMUSG00000015757,chr10:7797876-7798413	Ppil4,chr10:7797876-7798413	ENSMUSG00000015757	Ppil4	0.0425372	0.142104	0.07	DecIR
ENSMUSG00000040940,chr7:24924884-24924974	Arhgef1,chr7:24924884-24924974	ENSMUSG00000040940	Arhgef1	0.00120235	0.0103519	0.351	DecIR
ENSMUSG00000035890,chr10:79761500-79761563	Rnf126,chr10:79761500-79761563	ENSMUSG00000035890	Rnf126	7.20868e-13	7.63399e-11	0.672	DecIR
ENSMUSG00000020250,chr10:82879349-82879748	Txnrd1,chr10:82879349-82879748	ENSMUSG00000020250	Txnrd1	0.00774981	0.0414497	0.333	DecIR
ENSMUSG00000021832,chr14:45330910-45330985	Psmc6,chr14:45330910-45330985	ENSMUSG00000021832	Psmc6	0.0158198	0.0675532	0.388	DecIR
ENSMUSG00000027002,chr2:80553228-80553305	Nckap1,chr2:80553228-80553305	ENSMUSG00000027002	Nckap1	0.0212257	0.081442	0.287	DecIR
ENSMUSG00000038482,chr8:13370647-13370877	Tfdp1,chr8:13370647-13370877	ENSMUSG00000038482	Tfdp1	0.00751808	0.0406206	0.635	DecIR
ENSMUSG00000031939,chr9:15310410-15311525	Taf1d,chr9:15310410-15311525	ENSMUSG00000031939	Taf1d	1.75793e-06	3.20974e-05	0.54	DecIR
ENSMUSG00000031939,chr9:15314033-15314229	Taf1d,chr9:15314033-15314229	ENSMUSG00000031939	Taf1d	0.00614708	0.0353791	0.222	DecIR
ENSMUSG00000031939,chr9:15314265-15315100	Taf1d,chr9:15314265-15315100	ENSMUSG00000031939	Taf1d	2.29831e-05	0.000286529	0.329	DecIR
ENSMUSG00000022488,chr15:103473599-103473798	Nckap1l,chr15:103473599-103473798	ENSMUSG00000022488	Nckap1l	0.00814582	0.0424947	0.294	DecIR
ENSMUSG00000031862,chr8:69798514-69798582	Atp13a1,chr8:69798514-69798582	ENSMUSG00000031862	Atp13a1	0.034855	0.12182	0.156	DecIR
ENSMUSG00000045128,chr8:70895508-70895598	Rpl18a,chr8:70895508-70895598	ENSMUSG00000045128	Rpl18a	0.00195609	0.0149306	0.326	DecIR
ENSMUSG00000045128,chr8:70895710-70895914	Rpl18a,chr8:70895710-70895914	ENSMUSG00000045128	Rpl18a	1.88493e-06	3.3683e-05	0.661	DecIR
ENSMUSG00000033916,chr7:13032566-13032640	Chmp2a,chr7:13032566-13032640	ENSMUSG00000033916	Chmp2a	0.00491832	0.0299339	0.305	DecIR
ENSMUSG00000001065,chr8:123264927-123264993	Zfp276,chr8:123264927-123264993	ENSMUSG00000001065	Zfp276	0.0013833	0.0115348	0.094	DecIR
ENSMUSG00000035673,chr10:80069437-80069609	Sbno2,chr10:80069437-80069609	ENSMUSG00000035673	Sbno2	0.0338841	0.11911	0.213	DecIR
ENSMUSG00000032127,chr9:44353999-44354101	Vps11,chr9:44353999-44354101	ENSMUSG00000032127	Vps11	2.31537e-12	2.22907e-10	0.81	DecIR
ENSMUSG00000032322,chr9:56127538-56127725	Pstpip1,chr9:56127538-56127725	ENSMUSG00000032322	Pstpip1	7.44027e-12	5.25283e-10	0.591	DecIR
ENSMUSG00000028552,chr4:109361325-109361668	Eps15,chr4:109361325-109361668	ENSMUSG00000028552	Eps15	2.15389e-05	0.000274815	0.44	DecIR
ENSMUSG00000036622,chr4:141002547-141002622	Atp13a2,chr4:141002547-141002622	ENSMUSG00000036622	Atp13a2	0.00831527	0.0429555	0.32	DecIR
ENSMUSG00000023277,chr9:106212837-106212936	Twf2,chr9:106212837-106212936	ENSMUSG00000023277	Twf2	0.0137249	0.0605612	0.281	DecIR
ENSMUSG00000023277,chr9:106214252-106214354	Twf2,chr9:106214252-106214354	ENSMUSG00000023277	Twf2	0.00393225	0.0255476	0.57	DecIR
ENSMUSG00000025410,chr10:127277939-127278118	Dctn2,chr10:127277939-127278118	ENSMUSG00000025410	Dctn2	9.02805e-05	0.00103921	0.338	DecIR
ENSMUSG00000029647,chr5:147545736-147546363	Pan3,chr5:147545736-147546363	ENSMUSG00000029647	Pan3	2.68834e-06	4.51897e-05	0.192	DecIR
ENSMUSG00000001588,chr11:69884866-69885391	Acap1,chr11:69884866-69885391	ENSMUSG00000001588	Acap1	0.00063977	0.00594312	0.105	DecIR
ENSMUSG00000020888,chr11:70004875-70005153	Dvl2,chr11:70004875-70005153	ENSMUSG00000020888	Dvl2	0.0218197	0.082821	0.352	DecIR
ENSMUSG00000040746,chr11:70649766-70649910	Rnf167,chr11:70649766-70649910	ENSMUSG00000040746	Rnf167	3.54809e-06	5.6081e-05	0.371	DecIR
ENSMUSG00000040667,chr11:70943998-70944110	Nup88,chr11:70943998-70944110	ENSMUSG00000040667	Nup88	0.0031934	0.0218181	0.316	DecIR
ENSMUSG00000024194,chr17:26938468-26938570	Cuta,chr17:26938468-26938570	ENSMUSG00000024194	Cuta	0.00772431	0.0414497	0.267	DecIR
ENSMUSG00000034255,chr11:103338398-103338686	Arhgap27,chr11:103338398-103338686	ENSMUSG00000034255	Arhgap27	0.0117048	0.0538931	0.233	DecIR
ENSMUSG00000021428,chr13:38043979-38045271	Riok1,chr13:38043979-38045271	ENSMUSG00000021428	Riok1	9.68411e-11	5.69748e-09	0.724	DecIR
ENSMUSG00000021486,chr13:55324445-55324525	Prelid1,chr13:55324445-55324525	ENSMUSG00000021486	Prelid1	0.00149692	0.0121941	0.419	DecIR
ENSMUSG00000021494,chr13:55535805-55535884	Ddx41,chr13:55535805-55535884	ENSMUSG00000021494	Ddx41	0.0282404	0.103842	0.278	DecIR

## Sheet: S6
Supplementary Table 6. List of differentially intron retention loci between GC and MG in the spleen of RIKEN data
Locus (ensembl id)	Locus (ensemble id)	ensembl id	symbol	Pvalue	FDR	IncLevel	IR
ENSMUSG00000071646,chr19:8946385-8946646	Mta2,chr19:8946385-8946646	ENSMUSG00000071646	Mta2	0.000845719	0.0102137	-0.461	IncIR
ENSMUSG00000024948,chr19:6346126-6346207	Map4k2,chr19:6346126-6346207	ENSMUSG00000024948	Map4k2	2.04918e-07	7.7657e-06	-0.484	IncIR
ENSMUSG00000054874,chr19:5686667-5687117	Pcnx3,chr19:5686667-5687117	ENSMUSG00000054874	Pcnx3	4.87772e-10	3.82901e-08	-0.563	IncIR
ENSMUSG00000034616,chr19:4266447-4266520	Ssh3,chr19:4266447-4266520	ENSMUSG00000034616	Ssh3	0.0143369	0.073781	-0.259	IncIR
ENSMUSG00000056673,chrY:914184-916639	Kdm5d,chrY:914184-916639	ENSMUSG00000056673	Kdm5d	1.08067e-05	0.000188517	-0.39	IncIR
ENSMUSG00000024073,chr17:74561263-74562017	Birc6,chr17:74561263-74562017	ENSMUSG00000024073	Birc6	0.0227626	0.0988776	-0.57	IncIR
ENSMUSG00000002668,chr17:57066943-57067047	Dennd1c,chr17:57066943-57067047	ENSMUSG00000002668	Dennd1c	0.0012564	0.0145345	-0.121	IncIR
ENSMUSG00000071074,chr17:46251228-46251362	Yipf3,chr17:46251228-46251362	ENSMUSG00000071074	Yipf3	2.83107e-13	6.22269e-11	-0.79	IncIR
ENSMUSG00000023952,chr17:46165998-46166309	Gtpbp2,chr17:46165998-46166309	ENSMUSG00000023952	Gtpbp2	0.0242361	0.103238	-0.185	IncIR
ENSMUSG00000007029,chr17:35013748-35013826	Vars,chr17:35013748-35013826	ENSMUSG00000007029	Vars	0.00145668	0.0166759	-0.492	IncIR
ENSMUSG00000024338,chr17:34199381-34199569	Psmb8,chr17:34199381-34199569	ENSMUSG00000024338	Psmb8	4.77506e-08	3.08693e-06	-0.577	IncIR
ENSMUSG00000024338,chr17:34200271-34200709	Psmb8,chr17:34200271-34200709	ENSMUSG00000024338	Psmb8	0.0216748	0.0961094	-0.375	IncIR
ENSMUSG00000025733,chr17:25841856-25841988	Rhot2,chr17:25841856-25841988	ENSMUSG00000025733	Rhot2	0.0409055	0.146959	-0.296	IncIR
ENSMUSG00000022884,chr16:23110154-23110232	Eif4a2,chr16:23110154-23110232	ENSMUSG00000022884	Eif4a2	0.00392923	0.0351075	-0.234	IncIR
ENSMUSG00000022475,chr15:97800803-97802074	Hdac7,chr15:97800803-97802074	ENSMUSG00000022475	Hdac7	0.0287976	0.111048	-0.167	IncIR
ENSMUSG00000062906,chr15:89127692-89127920	Hdac10,chr15:89127692-89127920	ENSMUSG00000062906	Hdac10	6.29108e-06	0.000113343	-0.376	IncIR
ENSMUSG00000115987,chr15:76622563-76622653	Vps28,chr15:76622563-76622653	ENSMUSG00000115987	Vps28	0.0191781	0.0896881	-0.196	IncIR
ENSMUSG00000115987,chr15:76623495-76624084	Vps28,chr15:76623495-76624084	ENSMUSG00000115987	Vps28	0.00310963	0.0302433	-0.228	IncIR
ENSMUSG00000055762,chr15:75896465-75896638	Eef1d,chr15:75896465-75896638	ENSMUSG00000055762	Eef1d	0.00621549	0.0484451	-0.288	IncIR
ENSMUSG00000072501,chr15:66622818-66623990	Phf20l1,chr15:66622818-66623990	ENSMUSG00000072501	Phf20l1	0.000123322	0.00180708	-0.288	IncIR
ENSMUSG00000072501,chr15:66629982-66630865	Phf20l1,chr15:66629982-66630865	ENSMUSG00000072501	Phf20l1	0.0105888	0.0635907	-0.317	IncIR
ENSMUSG00000021012,chr12:98785407-98785633	Zc3h14,chr12:98785407-98785633	ENSMUSG00000021012	Zc3h14	0.000300669	0.00388747	-0.489	IncIR
ENSMUSG00000004789,chr12:85118415-85118525	Dlst,chr12:85118415-85118525	ENSMUSG00000004789	Dlst	0.00332237	0.0317503	-0.222	IncIR
ENSMUSG00000007411,chr12:111628303-111628960	Mark3,chr12:111628303-111628960	ENSMUSG00000007411	Mark3	8.0124e-05	0.001223	-0.239	IncIR
ENSMUSG00000024446,chr17:36257525-36257604	Rpp21,chr17:36257525-36257604	ENSMUSG00000024446	Rpp21	0.0141478	0.0736741	-0.259	IncIR
ENSMUSG00000034974,chr10:81190300-81190380	Dapk3,chr10:81190300-81190380	ENSMUSG00000034974	Dapk3	0.0325527	0.122519	-0.305	IncIR
ENSMUSG00000024807,chr19:6048368-6048453	Syvn1,chr19:6048368-6048453	ENSMUSG00000024807	Syvn1	1.78998e-07	7.06945e-06	-0.593	IncIR
ENSMUSG00000024807,chr19:6049254-6049769	Syvn1,chr19:6049254-6049769	ENSMUSG00000024807	Syvn1	0.00389212	0.0351075	-0.154	IncIR
ENSMUSG00000029782,chr6:30506918-30508452	Tmem209,chr6:30506918-30508452	ENSMUSG00000029782	Tmem209	0.0281471	0.11056	-0.256	IncIR
ENSMUSG00000018076,chr5:118749829-118750844	Med13l,chr5:118749829-118750844	ENSMUSG00000018076	Med13l	1.89504e-12	2.31405e-10	-0.766	IncIR
ENSMUSG00000004815,chr5:108649926-108650199	Dgkq,chr5:108649926-108650199	ENSMUSG00000004815	Dgkq	0.0389467	0.14173	-0.281	IncIR
ENSMUSG00000007850,chr11:50379965-50382535	Hnrnph1,chr11:50379965-50382535	ENSMUSG00000007850	Hnrnph1	0.032944	0.123568	-0.07	IncIR
ENSMUSG00000033364,chr1:74468385-74470535	Usp37,chr1:74468385-74470535	ENSMUSG00000033364	Usp37	0.00487625	0.0396963	-0.322	IncIR
ENSMUSG00000028670,chr4:135969530-135969599	Lypla2,chr4:135969530-135969599	ENSMUSG00000028670	Lypla2	0.0409161	0.146959	-0.296	IncIR
ENSMUSG00000041936,chr4:156173131-156173541	Agrn,chr4:156173131-156173541	ENSMUSG00000041936	Agrn	0.00268729	0.0270948	-0.6	IncIR
ENSMUSG00000032596,chr9:107981297-107981388	Uba7,chr9:107981297-107981388	ENSMUSG00000032596	Uba7	0.00600619	0.0474878	-0.16	IncIR
ENSMUSG00000013858,chr10:79978063-79978186	Tmem259,chr10:79978063-79978186	ENSMUSG00000013858	Tmem259	0.0274874	0.11056	-0.175	IncIR
ENSMUSG00000013858,chr10:79978321-79978390	Tmem259,chr10:79978321-79978390	ENSMUSG00000013858	Tmem259	0.0262792	0.107766	-0.303	IncIR
ENSMUSG00000042524,chr15:79728085-79728414	Sun2,chr15:79728085-79728414	ENSMUSG00000042524	Sun2	0.00384024	0.0351075	-0.253	IncIR
ENSMUSG00000028248,chr4:21869616-21870350	Pnisr,chr4:21869616-21870350	ENSMUSG00000028248	Pnisr	0.00223865	0.0243149	-0.105	IncIR
ENSMUSG00000020640,chr12:4712037-4712465	Itsn2,chr12:4712037-4712465	ENSMUSG00000020640	Itsn2	3.91925e-07	1.05055e-05	-0.454	IncIR
ENSMUSG00000030057,chr6:87845558-87845654	Cnbp,chr6:87845558-87845654	ENSMUSG00000030057	Cnbp	0.00396935	0.0351124	-0.315	IncIR
ENSMUSG00000019338,chr3:95008918-95009074	Zfp687,chr3:95008918-95009074	ENSMUSG00000019338	Zfp687	0.0124334	0.0688576	-0.3	IncIR
ENSMUSG00000028467,chr4:43567468-43567723	Gba2,chr4:43567468-43567723	ENSMUSG00000028467	Gba2	0.0110841	0.0649362	-0.211	IncIR
ENSMUSG00000028467,chr4:43569662-43569828	Gba2,chr4:43569662-43569828	ENSMUSG00000028467	Gba2	0.0214093	0.096042	-0.175	IncIR
ENSMUSG00000028099,chr3:96723700-96723795	Polr3c,chr3:96723700-96723795	ENSMUSG00000028099	Polr3c	0.00463737	0.0389044	-0.231	IncIR
ENSMUSG00000009292,chr10:77913911-77914710	Trpm2,chr10:77913911-77914710	ENSMUSG00000009292	Trpm2	0.0140714	0.0736741	-0.281	IncIR
ENSMUSG00000023971,chr17:46672592-46672704	Rrp36,chr17:46672592-46672704	ENSMUSG00000023971	Rrp36	0.0100843	0.0615448	-0.4	IncIR
ENSMUSG00000042404,chr3:90277905-90277986	Dennd4b,chr3:90277905-90277986	ENSMUSG00000042404	Dennd4b	0.0126628	0.0692891	-0.17	IncIR
ENSMUSG00000060671,chr3:89946540-89946623	Atp8b2,chr3:89946540-89946623	ENSMUSG00000060671	Atp8b2	0.00483303	0.0396381	-0.45	IncIR
ENSMUSG00000064068,chr3:89210184-89210264	Mtx1,chr3:89210184-89210264	ENSMUSG00000064068	Mtx1	0.0126725	0.0692891	-0.286	IncIR
ENSMUSG00000053931,chr3:121450071-121450290	Cnn3,chr3:121450071-121450290	ENSMUSG00000053931	Cnn3	0.0226204	0.0986502	-0.222	IncIR
ENSMUSG00000015291,chrX:74309176-74309961	Gdi1,chrX:74309176-74309961	ENSMUSG00000015291	Gdi1	0.0282069	0.11056	-0.152	IncIR
ENSMUSG00000027423,chr2:144254813-144254901	Snx5,chr2:144254813-144254901	ENSMUSG00000027423	Snx5	0.0447978	0.158305	-0.075	IncIR
ENSMUSG00000026927,chr2:26385610-26385988	Entr1,chr2:26385610-26385988	ENSMUSG00000026927	Entr1	0.00260467	0.0267527	-0.184	IncIR
ENSMUSG00000047767,chr7:101291593-101291877	Atg16l2,chr7:101291593-101291877	ENSMUSG00000047767	Atg16l2	0.0152074	0.0759676	-0.189	IncIR
ENSMUSG00000057335,chr1:176735982-176736842	Cep170,chr1:176735982-176736842	ENSMUSG00000057335	Cep170	0.0142119	0.0736741	-0.296	IncIR
ENSMUSG00000029146,chr5:31195857-31195949	Snx17,chr5:31195857-31195949	ENSMUSG00000029146	Snx17	5.85506e-07	1.46243e-05	-0.494	IncIR
ENSMUSG00000035047,chr9:21281740-21281813	Kri1,chr9:21281740-21281813	ENSMUSG00000035047	Kri1	1.31644e-09	9.64513e-08	-0.532	IncIR
ENSMUSG00000037318,chr1:193194550-193194823	Traf3ip3,chr1:193194550-193194823	ENSMUSG00000037318	Traf3ip3	3.30943e-06	6.62323e-05	-0.303	IncIR
ENSMUSG00000053332,chr1:161036015-161036206	Gas5,chr1:161036015-161036206	ENSMUSG00000053332	Gas5	0.0216983	0.0961094	-0.256	IncIR
ENSMUSG00000053332,chr1:161036245-161036547	Gas5,chr1:161036245-161036547	ENSMUSG00000053332	Gas5	0.0262396	0.107766	-0.271	IncIR
ENSMUSG00000026509,chr1:182490049-182490865	Capn2,chr1:182490049-182490865	ENSMUSG00000026509	Capn2	0.0262796	0.107766	-0.303	IncIR
ENSMUSG00000026509,chr1:182491036-182492060	Capn2,chr1:182491036-182492060	ENSMUSG00000026509	Capn2	2.16066e-07	7.86507e-06	-0.589	IncIR
ENSMUSG00000029661,chr6:4534689-4535379	Col1a2,chr6:4534689-4535379	ENSMUSG00000029661	Col1a2	2.1087e-08	1.44842e-06	-0.636	IncIR
ENSMUSG00000029433,chr5:123517834-123517953	Diablo,chr5:123517834-123517953	ENSMUSG00000029433	Diablo	0.0170942	0.0813092	-0.25	IncIR
ENSMUSG00000006005,chr1:150440199-150440437	Tpr,chr1:150440199-150440437	ENSMUSG00000006005	Tpr	0.00551701	0.0442569	-0.434	IncIR
ENSMUSG00000002103,chr2:91206278-91206715	Acp2,chr2:91206278-91206715	ENSMUSG00000002103	Acp2	0.00762217	0.052512	-0.19	IncIR
ENSMUSG00000029068,chr4:155817988-155820327	Ccnl2,chr4:155817988-155820327	ENSMUSG00000029068	Ccnl2	0.00035786	0.00457311	-0.163	IncIR
ENSMUSG00000036046,chr15:84950775-84953128	5031439G07Rik,chr15:84950775-84953128	ENSMUSG00000036046	5031439G07Rik	0.00387365	0.0351075	-0.333	IncIR
ENSMUSG00000017652,chr2:165069716-165069815	Cd40,chr2:165069716-165069815	ENSMUSG00000017652	Cd40	0.027922	0.11056	-0.238	IncIR
ENSMUSG00000041763,chr1:43951212-43953255	Tpp2,chr1:43951212-43953255	ENSMUSG00000041763	Tpp2	0.0343818	0.127224	-0.321	IncIR
ENSMUSG00000041763,chr1:44001439-44002102	Tpp2,chr1:44001439-44002102	ENSMUSG00000041763	Tpp2	0.0159716	0.0785737	-0.311	IncIR
ENSMUSG00000028656,chr4:122862747-122862899	Cap1,chr4:122862747-122862899	ENSMUSG00000028656	Cap1	0.00433856	0.0372506	-0.393	IncIR
ENSMUSG00000028245,chr4:6420141-6421055	Nsmaf,chr4:6420141-6421055	ENSMUSG00000028245	Nsmaf	0.000243746	0.0032668	-0.401	IncIR
ENSMUSG00000030083,chr6:88840766-88840836	Abtb1,chr6:88840766-88840836	ENSMUSG00000030083	Abtb1	2.60862e-06	5.40919e-05	-0.424	IncIR
ENSMUSG00000041560,chr7:15937890-15938172	Nop53,chr7:15937890-15938172	ENSMUSG00000041560	Nop53	0.0108422	0.0644876	-0.29	IncIR
ENSMUSG00000028954,chr5:24694762-24695518	Nub1,chr5:24694762-24695518	ENSMUSG00000028954	Nub1	0.0084274	0.0557935	-0.286	IncIR
ENSMUSG00000039515,chr2:30438354-30439662	Ptpa,chr2:30438354-30439662	ENSMUSG00000039515	Ptpa	0.0190555	0.0894957	-0.287	IncIR
ENSMUSG00000028821,chr4:134935050-134935372	Syf2,chr4:134935050-134935372	ENSMUSG00000028821	Syf2	0.0440092	0.15602	-0.536	IncIR
ENSMUSG00000021748,chr14:8171531-8172762	Pdhb,chr14:8171531-8172762	ENSMUSG00000021748	Pdhb	0.0116171	0.0665871	-0.29	IncIR
ENSMUSG00000031386,chrX:73946848-73946933	Hcfc1,chrX:73946848-73946933	ENSMUSG00000031386	Hcfc1	1.80113e-07	7.06945e-06	-0.593	IncIR
ENSMUSG00000057738,chr2:30029675-30029998	Sptan1,chr2:30029675-30029998	ENSMUSG00000057738	Sptan1	0.0331118	0.123775	-0.547	IncIR
ENSMUSG00000030058,chr6:87892720-87893794	Copg1,chr6:87892720-87893794	ENSMUSG00000030058	Copg1	0.00988748	0.0610469	-0.242	IncIR
ENSMUSG00000038374,chr3:96631569-96631687	Rbm8a,chr3:96631569-96631687	ENSMUSG00000038374	Rbm8a	0.0116357	0.0665871	-0.286	IncIR
ENSMUSG00000016559,chr11:116023779-116023880	H3f3b,chr11:116023779-116023880	ENSMUSG00000016559	H3f3b	0.0232879	0.100762	-0.332	IncIR
ENSMUSG00000021819,chr14:20721660-20721868	Zswim8,chr14:20721660-20721868	ENSMUSG00000021819	Zswim8	0.0281471	0.11056	-0.256	IncIR
ENSMUSG00000027433,chr2:147029785-147029867	Xrn2,chr2:147029785-147029867	ENSMUSG00000027433	Xrn2	0.00663801	0.0488537	-0.27	IncIR
ENSMUSG00000038346,chr6:125024553-125024744	Zfp384,chr6:125024553-125024744	ENSMUSG00000038346	Zfp384	0.00801025	0.0540078	-0.428	IncIR
ENSMUSG00000090077,chr2:181382545-181382614	Lime1,chr2:181382545-181382614	ENSMUSG00000090077	Lime1	0.0094612	0.0600774	-0.286	IncIR
ENSMUSG00000019139,chr8:70594544-70594618	Isyna1,chr8:70594544-70594618	ENSMUSG00000019139	Isyna1	0.00268038	0.0270948	-0.629	IncIR
ENSMUSG00000019139,chr8:70594749-70594821	Isyna1,chr8:70594749-70594821	ENSMUSG00000019139	Isyna1	6.14397e-13	1.12537e-10	-0.717	IncIR
ENSMUSG00000079197,chr14:55587741-55588038	Psme2,chr14:55587741-55588038	ENSMUSG00000079197	Psme2	0.00667271	0.0488537	-0.3	IncIR
ENSMUSG00000011877,chr11:77505591-77505678	Git1,chr11:77505591-77505678	ENSMUSG00000011877	Git1	0.0204225	0.0934973	-0.286	IncIR
ENSMUSG00000031708,chr8:83572947-83573026	Tecr,chr8:83572947-83573026	ENSMUSG00000031708	Tecr	6.20506e-06	0.000113343	-0.237	IncIR
ENSMUSG00000031708,chr8:83573144-83573218	Tecr,chr8:83573144-83573218	ENSMUSG00000031708	Tecr	0.00671566	0.0488537	-0.125	IncIR
ENSMUSG00000019087,chrX:74300772-74301322	Atp6ap1,chrX:74300772-74301322	ENSMUSG00000019087	Atp6ap1	0.00635364	0.0484451	-0.238	IncIR
ENSMUSG00000030822,chr7:127473717-127473795	Prr14,chr7:127473717-127473795	ENSMUSG00000030822	Prr14	0.022119	0.097235	-0.451	IncIR
ENSMUSG00000015165,chr7:28818533-28818642	Hnrnpl,chr7:28818533-28818642	ENSMUSG00000015165	Hnrnpl	0.00237043	0.025049	-0.233	IncIR
ENSMUSG00000074578,chr2:167065218-167065432	Zfas1,chr2:167065218-167065432	ENSMUSG00000074578	Zfas1	0.000200602	0.00282643	-0.592	IncIR
ENSMUSG00000037400,chr3:35837590-35839047	Atp11b,chr3:35837590-35839047	ENSMUSG00000037400	Atp11b	0.0167727	0.0812037	-0.493	IncIR
ENSMUSG00000021555,chr13:59607313-59607386	Naa35,chr13:59607313-59607386	ENSMUSG00000021555	Naa35	0.000243591	0.0032668	-0.461	IncIR
ENSMUSG00000013593,chr1:171238065-171238285	Ndufs2,chr1:171238065-171238285	ENSMUSG00000013593	Ndufs2	0.0283692	0.11056	-0.388	IncIR
ENSMUSG00000000441,chr6:115620328-115621814	Raf1,chr6:115620328-115621814	ENSMUSG00000000441	Raf1	4.32703e-07	1.10591e-05	-0.454	IncIR
ENSMUSG00000030138,chr6:118413222-118413729	Bms1,chr6:118413222-118413729	ENSMUSG00000030138	Bms1	0.0280866	0.11056	-0.167	IncIR
ENSMUSG00000037447,chr1:36317325-36317608	Arid5a,chr1:36317325-36317608	ENSMUSG00000037447	Arid5a	0.0118503	0.0667868	-0.211	IncIR
ENSMUSG00000004268,chr6:124705089-124705156	Emg1,chr6:124705089-124705156	ENSMUSG00000004268	Emg1	0.0108588	0.0644876	-0.221	IncIR
ENSMUSG00000019927,chr10:71259820-71262082	Ube2d1,chr10:71259820-71262082	ENSMUSG00000019927	Ube2d1	0.0198076	0.0916009	-0.308	IncIR
ENSMUSG00000029578,chr5:142658289-142659063	Wipi2,chr5:142658289-142659063	ENSMUSG00000029578	Wipi2	0.0292012	0.111431	-0.333	IncIR
ENSMUSG00000090231,chr17:34856930-34857002	Cfb,chr17:34856930-34857002	ENSMUSG00000090231	Cfb	9.48145e-05	0.00142741	-0.404	IncIR
ENSMUSG00000030468,chr7:43409522-43410507	Siglecg,chr7:43409522-43410507	ENSMUSG00000030468	Siglecg	0.010106	0.0615448	-0.08	IncIR
ENSMUSG00000030468,chr7:43411820-43411888	Siglecg,chr7:43411820-43411888	ENSMUSG00000030468	Siglecg	0.000550245	0.0067946	-0.27	IncIR
ENSMUSG00000038502,chr7:44863733-44864381	Ptov1,chr7:44863733-44864381	ENSMUSG00000038502	Ptov1	0.0129333	0.0700183	-0.211	IncIR
ENSMUSG00000008690,chr15:89370489-89370599	Ncaph2,chr15:89370489-89370599	ENSMUSG00000008690	Ncaph2	0.0121101	0.0677275	-0.246	IncIR
ENSMUSG00000027829,chr3:65948791-65950478	Ccnl1,chr3:65948791-65950478	ENSMUSG00000027829	Ccnl1	2.33698e-06	4.96439e-05	-0.235	IncIR
ENSMUSG00000064127,chrX:12706446-12706530	Med14,chrX:12706446-12706530	ENSMUSG00000064127	Med14	0.0102502	0.0618956	-0.278	IncIR
ENSMUSG00000066232,chr7:110049071-110049594	Ipo7,chr7:110049071-110049594	ENSMUSG00000066232	Ipo7	1.87468e-06	4.12056e-05	-0.508	IncIR
ENSMUSG00000030751,chr7:114274128-114274414	Psma1,chr7:114274128-114274414	ENSMUSG00000030751	Psma1	7.97107e-05	0.001223	-0.413	IncIR
ENSMUSG00000057193,chr9:21342867-21342962	Slc44a2,chr9:21342867-21342962	ENSMUSG00000057193	Slc44a2	0.00107273	0.0125418	-0.178	IncIR
ENSMUSG00000022295,chr15:38679412-38681065	Atp6v1c1,chr15:38679412-38681065	ENSMUSG00000022295	Atp6v1c1	0.0130441	0.0702721	-0.259	IncIR
ENSMUSG00000040940,chr7:24923735-24923801	Arhgef1,chr7:24923735-24923801	ENSMUSG00000040940	Arhgef1	0.000173866	0.0025142	-0.551	IncIR
ENSMUSG00000032480,chr9:110085879-110085948	Dhx30,chr9:110085879-110085948	ENSMUSG00000032480	Dhx30	0.0111083	0.0649362	-0.261	IncIR
ENSMUSG00000055862,chr10:80703757-80703851	Izumo4,chr10:80703757-80703851	ENSMUSG00000055862	Izumo4	3.42036e-05	0.00055279	-0.293	IncIR
ENSMUSG00000020250,chr10:82879349-82879748	Txnrd1,chr10:82879349-82879748	ENSMUSG00000020250	Txnrd1	0.0385996	0.140933	-0.208	IncIR
ENSMUSG00000020362,chr11:49685156-49685261	Cnot6,chr11:49685156-49685261	ENSMUSG00000020362	Cnot6	1.78012e-06	3.99257e-05	-0.465	IncIR
ENSMUSG00000021957,chr14:30558839-30559750	Tkt,chr14:30558839-30559750	ENSMUSG00000021957	Tkt	0.00634014	0.0484451	-0.315	IncIR
ENSMUSG00000038102,chr8:47513809-47513879	Trappc11,chr8:47513809-47513879	ENSMUSG00000038102	Trappc11	0.0173292	0.0817372	-0.313	IncIR
ENSMUSG00000031939,chr9:15314265-15315100	Taf1d,chr9:15314265-15315100	ENSMUSG00000031939	Taf1d	0.0214106	0.096042	-0.286	IncIR
ENSMUSG00000070000,chr8:71717284-71717434	Fcho1,chr8:71717284-71717434	ENSMUSG00000070000	Fcho1	1.0808e-10	1.10133e-08	-0.783	IncIR
ENSMUSG00000036550,chr8:95772175-95773430	Cnot1,chr8:95772175-95773430	ENSMUSG00000036550	Cnot1	8.55366e-08	4.70023e-06	-0.573	IncIR
ENSMUSG00000031897,chr8:105936755-105936864	Psmb10,chr8:105936755-105936864	ENSMUSG00000031897	Psmb10	3.31028e-07	9.57369e-06	-0.552	IncIR
ENSMUSG00000052593,chr12:21329133-21330031	Adam17,chr12:21329133-21330031	ENSMUSG00000052593	Adam17	0.00271886	0.0271639	-0.433	IncIR
ENSMUSG00000032280,chr9:61411340-61412263	Tle3,chr9:61411340-61412263	ENSMUSG00000032280	Tle3	0.00945546	0.0600774	-0.296	IncIR
ENSMUSG00000027284,chr2:120729803-120729928	Cdan1,chr2:120729803-120729928	ENSMUSG00000027284	Cdan1	0.0287497	0.111048	-0.295	IncIR
ENSMUSG00000035673,chr10:80069437-80069609	Sbno2,chr10:80069437-80069609	ENSMUSG00000035673	Sbno2	0.0340707	0.126683	-0.388	IncIR
ENSMUSG00000037266,chr4:134925433-134926733	Rsrp1,chr4:134925433-134926733	ENSMUSG00000037266	Rsrp1	1.20254e-10	1.10133e-08	-0.25	IncIR
ENSMUSG00000035711,chr13:55527638-55528447	Dok3,chr13:55527638-55528447	ENSMUSG00000035711	Dok3	0.000966723	0.011424	-0.17	IncIR
ENSMUSG00000006676,chr9:108498037-108498121	Usp19,chr9:108498037-108498121	ENSMUSG00000006676	Usp19	0.025172	0.105993	-0.144	IncIR
ENSMUSG00000036138,chr9:119344509-119346468	Acaa1a,chr9:119344509-119346468	ENSMUSG00000036138	Acaa1a	0.00675683	0.0488537	-0.207	IncIR
ENSMUSG00000040746,chr11:70650018-70650124	Rnf167,chr11:70650018-70650124	ENSMUSG00000040746	Rnf167	0.00301268	0.0295619	-0.133	IncIR
ENSMUSG00000040463,chr11:72442645-72442744	Mybbp1a,chr11:72442645-72442744	ENSMUSG00000040463	Mybbp1a	0.00966956	0.0604985	-0.233	IncIR
ENSMUSG00000031816,chr8:121101537-121102912	Mthfsd,chr8:121101537-121102912	ENSMUSG00000031816	Mthfsd	0.0165221	0.0806479	-0.292	IncIR
ENSMUSG00000025142,chr11:120709000-120709069	Aspscr1,chr11:120709000-120709069	ENSMUSG00000025142	Aspscr1	0.0254829	0.106486	-0.222	IncIR
ENSMUSG00000025225,chr19:46306365-46306484	Nfkb2,chr19:46306365-46306484	ENSMUSG00000025225	Nfkb2	7.80768e-08	4.51613e-06	0.586	DecIR
ENSMUSG00000024725,chr19:18584744-18586545	Ostf1,chr19:18584744-18586545	ENSMUSG00000024725	Ostf1	0	0	0.876	DecIR
ENSMUSG00000024965,chr19:7002947-7003029	Fermt3,chr19:7002947-7003029	ENSMUSG00000024965	Fermt3	0.0439147	0.15602	0.305	DecIR
ENSMUSG00000024948,chr19:6352862-6353118	Map4k2,chr19:6352862-6353118	ENSMUSG00000024948	Map4k2	0.00642684	0.0484451	0.237	DecIR
ENSMUSG00000024910,chr19:5466146-5466229	Ctsw,chr19:5466146-5466229	ENSMUSG00000024910	Ctsw	0.00390849	0.0351075	0.148	DecIR
ENSMUSG00000024824,chr19:4197587-4197669	Rad9a,chr19:4197587-4197669	ENSMUSG00000024824	Rad9a	0.0118226	0.0667868	0.246	DecIR
ENSMUSG00000001750,chr19:3898639-3898716	Tcirg1,chr19:3898639-3898716	ENSMUSG00000001750	Tcirg1	0.00983762	0.0610469	0.257	DecIR
ENSMUSG00000024454,chr18:37941459-37941706	Hdac3,chr18:37941459-37941706	ENSMUSG00000024454	Hdac3	0.0265598	0.108214	0.327	DecIR
ENSMUSG00000024287,chr18:9986604-9986689	Thoc1,chr18:9986604-9986689	ENSMUSG00000024287	Thoc1	0.0418671	0.149551	0.108	DecIR
ENSMUSG00000042625,chr17:56563244-56563360	Safb2,chr17:56563244-56563360	ENSMUSG00000042625	Safb2	0.00430815	0.0372506	0.248	DecIR
ENSMUSG00000023952,chr17:46164379-46164723	Gtpbp2,chr17:46164379-46164723	ENSMUSG00000023952	Gtpbp2	0.0072255	0.0502584	0.148	DecIR
ENSMUSG00000038762,chr17:35963237-35963319	Abcf1,chr17:35963237-35963319	ENSMUSG00000038762	Abcf1	0.0355932	0.130826	0.387	DecIR
ENSMUSG00000007029,chr17:35011695-35011806	Vars,chr17:35011695-35011806	ENSMUSG00000007029	Vars	0.00854757	0.0562502	0.098	DecIR
ENSMUSG00000062753,chr17:27564255-27564383	AI413582,chr17:27564255-27564383	ENSMUSG00000062753	AI413582	0.00187186	0.0207795	0.184	DecIR
ENSMUSG00000024193,chr17:26935819-26935917	Phf1,chr17:26935819-26935917	ENSMUSG00000024193	Phf1	0.00630427	0.0484451	0.253	DecIR
ENSMUSG00000022710,chr16:8697995-8698450	Usp7,chr16:8697995-8698450	ENSMUSG00000022710	Usp7	0.02949	0.112144	0.238	DecIR
ENSMUSG00000022515,chr16:4947759-4948224	Anks3,chr16:4947759-4948224	ENSMUSG00000022515	Anks3	0.0148933	0.0750815	0.222	DecIR
ENSMUSG00000036606,chr15:89157251-89157390	Plxnb2,chr15:89157251-89157390	ENSMUSG00000036606	Plxnb2	0.0101361	0.0615448	0.317	DecIR
ENSMUSG00000022386,chr15:85896505-85896833	Trmu,chr15:85896505-85896833	ENSMUSG00000022386	Trmu	0.0193661	0.0901838	0.333	DecIR
ENSMUSG00000061740,chr15:82373288-82373671	Cyp2d22,chr15:82373288-82373671	ENSMUSG00000061740	Cyp2d22	1.62101e-07	7.06945e-06	0.59	DecIR
ENSMUSG00000022463,chr15:82170155-82171100	Srebf2,chr15:82170155-82171100	ENSMUSG00000022463	Srebf2	0.0144339	0.073781	0.346	DecIR
ENSMUSG00000034022,chr15:76596350-76596414	Cpsf1,chr15:76596350-76596414	ENSMUSG00000034022	Cpsf1	1.10973e-10	1.10133e-08	0.57	DecIR
ENSMUSG00000022283,chr15:36598128-36598200	Pabpc1,chr15:36598128-36598200	ENSMUSG00000022283	Pabpc1	0.00399368	0.0351124	0.039	DecIR
ENSMUSG00000053137,chr15:89146384-89146469	Mapk11,chr15:89146384-89146469	ENSMUSG00000053137	Mapk11	0.0115595	0.0665871	0.316	DecIR
ENSMUSG00000041747,chr13:98258015-98259103	Utp15,chr13:98258015-98259103	ENSMUSG00000041747	Utp15	0.020666	0.0934973	0.333	DecIR
ENSMUSG00000006360,chr12:113153665-113153773	Crip1,chr12:113153665-113153773	ENSMUSG00000006360	Crip1	7.12963e-08	4.35303e-06	0.703	DecIR
ENSMUSG00000054435,chr6:48690514-48690775	Gimap4,chr6:48690514-48690775	ENSMUSG00000054435	Gimap4	0.00707393	0.0498349	0.035	DecIR
ENSMUSG00000024807,chr19:6050686-6050939	Syvn1,chr19:6050686-6050939	ENSMUSG00000024807	Syvn1	0.00335308	0.0317675	0.255	DecIR
ENSMUSG00000052142,chr17:32403400-32403519	Rasal3,chr17:32403400-32403519	ENSMUSG00000052142	Rasal3	0.000122895	0.00180708	0.145	DecIR
ENSMUSG00000026034,chr1:58417180-58417265	Clk1,chr1:58417180-58417265	ENSMUSG00000026034	Clk1	0.022229	0.0973293	0.128	DecIR
ENSMUSG00000036948,chr5:138260990-138261551	Map11,chr5:138260990-138261551	ENSMUSG00000036948	Map11	4.10245e-07	1.07347e-05	0.502	DecIR
ENSMUSG00000000916,chr5:135375486-135375553	Nsun5,chr5:135375486-135375553	ENSMUSG00000000916	Nsun5	0.020667	0.0934973	0.208	DecIR
ENSMUSG00000058503,chr5:3558694-3559095	Fam133b,chr5:3558694-3559095	ENSMUSG00000058503	Fam133b	0.00968857	0.0604985	0.261	DecIR
ENSMUSG00000029730,chr5:138169474-138169558	Mcm7,chr5:138169474-138169558	ENSMUSG00000029730	Mcm7	0.012909	0.0700183	0.333	DecIR
ENSMUSG00000037174,chr3:51265007-51266751	Elf2,chr3:51265007-51266751	ENSMUSG00000037174	Elf2	0.00446224	0.0380155	0.173	DecIR
ENSMUSG00000037742,chr9:78479535-78479622	Eef1a1,chr9:78479535-78479622	ENSMUSG00000037742	Eef1a1	0.00148615	0.0168379	0.421	DecIR
ENSMUSG00000058569,chr13:55593358-55593499	Tmed9,chr13:55593358-55593499	ENSMUSG00000058569	Tmed9	0.0203144	0.0934122	0.334	DecIR
ENSMUSG00000060992,chr15:103290757-103291327	Copz1,chr15:103290757-103291327	ENSMUSG00000060992	Copz1	0.0239658	0.102765	0.054	DecIR
ENSMUSG00000020486,chr11:87589819-87589954	Septin4,chr11:87589819-87589954	ENSMUSG00000020486	Septin4	0.0487507	0.170086	0.169	DecIR
ENSMUSG00000017221,chr11:98690654-98690914	Psmd3,chr11:98690654-98690914	ENSMUSG00000017221	Psmd3	0.00474728	0.0395247	0.231	DecIR
ENSMUSG00000016344,chr2:181187737-181187807	Ppdpf,chr2:181187737-181187807	ENSMUSG00000016344	Ppdpf	0.00457066	0.0386397	0.194	DecIR
ENSMUSG00000030180,chr6:120427873-120428216	Kdm5a,chr6:120427873-120428216	ENSMUSG00000030180	Kdm5a	0.0091958	0.0591005	0.267	DecIR
ENSMUSG00000001229,chr17:56205622-56205695	Dpp9,chr17:56205622-56205695	ENSMUSG00000001229	Dpp9	0.0292006	0.111431	0.333	DecIR
ENSMUSG00000016503,chr5:146953308-146953846	Gtf3a,chr5:146953308-146953846	ENSMUSG00000016503	Gtf3a	0.0462792	0.162495	0.278	DecIR
ENSMUSG00000029385,chr5:93271045-93271199	Ccng2,chr5:93271045-93271199	ENSMUSG00000029385	Ccng2	0.0170695	0.0813092	0.25	DecIR
ENSMUSG00000036023,chr14:50815428-50816195	Parp2,chr14:50815428-50816195	ENSMUSG00000036023	Parp2	1.15404e-06	2.75716e-05	0.452	DecIR
ENSMUSG00000028809,chr4:135344670-135346733	Srrm1,chr4:135344670-135346733	ENSMUSG00000028809	Srrm1	0.00150692	0.0168991	0.167	DecIR
ENSMUSG00000014778,chr8:105331825-105332035	Fhod1,chr8:105331825-105332035	ENSMUSG00000014778	Fhod1	0.0341202	0.126683	0.145	DecIR
ENSMUSG00000028582,chr4:108626377-108626478	Cc2d1b,chr4:108626377-108626478	ENSMUSG00000028582	Cc2d1b	0.00583034	0.0464315	0.452	DecIR
ENSMUSG00000001416,chr3:88300851-88300927	Cct3,chr3:88300851-88300927	ENSMUSG00000001416	Cct3	0.00291964	0.0289071	0.216	DecIR
ENSMUSG00000029056,chr4:154979026-154979490	Pank4,chr4:154979026-154979490	ENSMUSG00000029056	Pank4	0.0151438	0.0759676	0.235	DecIR
ENSMUSG00000063800,chr4:108568471-108570154	Prpf38a,chr4:108568471-108570154	ENSMUSG00000063800	Prpf38a	0.0146239	0.074406	0.235	DecIR
ENSMUSG00000020260,chr10:77265962-77266911	Pofut2,chr10:77265962-77266911	ENSMUSG00000020260	Pofut2	0.0168771	0.0812086	0.25	DecIR
ENSMUSG00000031389,chrX:73899873-73900097	Arhgap4,chrX:73899873-73900097	ENSMUSG00000031389	Arhgap4	0.02471	0.104447	0.185	DecIR
ENSMUSG00000033191,chr4:118479153-118479611	Tie1,chr4:118479153-118479611	ENSMUSG00000033191	Tie1	0.0496309	0.171436	0.267	DecIR
ENSMUSG00000037242,chr4:135223571-135226022	Clic4,chr4:135223571-135226022	ENSMUSG00000037242	Clic4	0.00836487	0.0557151	0.31	DecIR
ENSMUSG00000002014,chrX:73789875-73790357	Ssr4,chrX:73789875-73790357	ENSMUSG00000002014	Ssr4	0.00534337	0.0431791	0.16	DecIR
ENSMUSG00000034101,chr2:84608417-84608958	Ctnnd1,chr2:84608417-84608958	ENSMUSG00000034101	Ctnnd1	0.00643583	0.0484451	0.315	DecIR
ENSMUSG00000062963,chr1:171289595-171289882	Ufc1,chr1:171289595-171289882	ENSMUSG00000062963	Ufc1	3.11808e-05	0.000519208	0.422	DecIR
ENSMUSG00000027009,chr2:79288868-79289235	Itga4,chr2:79288868-79289235	ENSMUSG00000027009	Itga4	1.39036e-07	6.64349e-06	0.49	DecIR
ENSMUSG00000029034,chr4:155888110-155888182	Ints11,chr4:155888110-155888182	ENSMUSG00000029034	Ints11	0.0281471	0.11056	0.256	DecIR
ENSMUSG00000053332,chr1:161036853-161037122	Gas5,chr1:161036853-161037122	ENSMUSG00000053332	Gas5	0.00317189	0.0305781	0.244	DecIR
ENSMUSG00000053332,chr1:161037165-161037286	Gas5,chr1:161037165-161037286	ENSMUSG00000053332	Gas5	0.00620683	0.0484451	0.286	DecIR
ENSMUSG00000034807,chr8:71621897-71622701	Colgalt1,chr8:71621897-71622701	ENSMUSG00000034807	Colgalt1	3.42824e-07	9.66061e-06	0.276	DecIR
ENSMUSG00000042699,chr1:153464713-153464853	Dhx9,chr1:153464713-153464853	ENSMUSG00000042699	Dhx9	2.21854e-07	7.86507e-06	0.565	DecIR
ENSMUSG00000026360,chr1:144002842-144002950	Rgs2,chr1:144002842-144002950	ENSMUSG00000026360	Rgs2	0.0141762	0.0736741	0.365	DecIR
ENSMUSG00000025144,chr11:120711757-120711842	Cenpx,chr11:120711757-120711842	ENSMUSG00000025144	Cenpx	2.97672e-07	9.3469e-06	0.523	DecIR
ENSMUSG00000008845,chr6:124327988-124329043	Cd163,chr6:124327988-124329043	ENSMUSG00000008845	Cd163	0.00251505	0.0263242	0.133	DecIR
ENSMUSG00000009640,chr4:117676136-117676348	Dmap1,chr4:117676136-117676348	ENSMUSG00000009640	Dmap1	0.0283237	0.11056	0.256	DecIR
ENSMUSG00000037364,chr5:137296624-137296773	Srrt,chr5:137296624-137296773	ENSMUSG00000037364	Srrt	0.00258334	0.0267527	0.196	DecIR
ENSMUSG00000009741,chr9:113956069-113956705	Ubp1,chr9:113956069-113956705	ENSMUSG00000009741	Ubp1	1.60626e-06	3.69674e-05	0.229	DecIR
ENSMUSG00000038271,chr6:125153163-125153408	Iffo1,chr6:125153163-125153408	ENSMUSG00000038271	Iffo1	0.0265858	0.108214	0.303	DecIR
ENSMUSG00000024045,chr17:32315785-32316185	Akap8,chr17:32315785-32316185	ENSMUSG00000024045	Akap8	0.000220169	0.00306285	0.412	DecIR
ENSMUSG00000024045,chr17:32316668-32317065	Akap8,chr17:32316668-32317065	ENSMUSG00000024045	Akap8	0.00406651	0.035469	0.222	DecIR
ENSMUSG00000046223,chr7:24472055-24472571	Plaur,chr7:24472055-24472571	ENSMUSG00000046223	Plaur	0.0124683	0.0688576	0.222	DecIR
ENSMUSG00000005625,chr3:95033765-95033916	Psmd4,chr3:95033765-95033916	ENSMUSG00000005625	Psmd4	0.000473575	0.00598229	0.369	DecIR
ENSMUSG00000003031,chr6:134922084-134924241	Cdkn1b,chr6:134922084-134924241	ENSMUSG00000003031	Cdkn1b	3.31463e-06	6.62323e-05	0.301	DecIR
ENSMUSG00000046671,chr4:134530487-134530678	Mtfr1l,chr4:134530487-134530678	ENSMUSG00000046671	Mtfr1l	0.0109142	0.0644876	0.29	DecIR
ENSMUSG00000026269,chr1:92916947-92917145	Rnpepl1,chr1:92916947-92917145	ENSMUSG00000026269	Rnpepl1	0.000257011	0.00340307	0.494	DecIR
ENSMUSG00000026269,chr1:92918127-92918871	Rnpepl1,chr1:92918127-92918871	ENSMUSG00000026269	Rnpepl1	0.00671314	0.0488537	0.247	DecIR
ENSMUSG00000027330,chr2:131192689-131193066	Cdc25b,chr2:131192689-131193066	ENSMUSG00000027330	Cdc25b	5.29709e-06	0.000102132	0.435	DecIR
ENSMUSG00000063108,chr9:20444368-20444892	Zfp26,chr9:20444368-20444892	ENSMUSG00000063108	Zfp26	0.0147837	0.0748721	0.259	DecIR
ENSMUSG00000026083,chr1:38050326-38051121	Eif5b,chr1:38050326-38051121	ENSMUSG00000026083	Eif5b	0.000189029	0.00269796	0.241	DecIR
ENSMUSG00000017428,chr11:80469928-80470381	Psmd11,chr11:80469928-80470381	ENSMUSG00000017428	Psmd11	0.0153849	0.0765068	0.275	DecIR
ENSMUSG00000033055,chr15:79054604-79055290	Ankrd54,chr15:79054604-79055290	ENSMUSG00000033055	Ankrd54	0.0244275	0.103652	0.389	DecIR
ENSMUSG00000026803,chr2:29070078-29071296	Ttf1,chr2:29070078-29071296	ENSMUSG00000026803	Ttf1	0.0283237	0.11056	0.256	DecIR
ENSMUSG00000006299,chr1:74281433-74281525	Aamp,chr1:74281433-74281525	ENSMUSG00000006299	Aamp	0.049892	0.171436	0.424	DecIR
ENSMUSG00000034432,chr1:90604446-90605462	Cops8,chr1:90604446-90605462	ENSMUSG00000034432	Cops8	0.0262796	0.107766	0.303	DecIR
ENSMUSG00000025982,chr1:55014563-55016374	Sf3b1,chr1:55014563-55016374	ENSMUSG00000025982	Sf3b1	3.99746e-10	3.37939e-08	0.193	DecIR
ENSMUSG00000039041,chr2:180172973-180173908	Adrm1,chr2:180172973-180173908	ENSMUSG00000039041	Adrm1	0.0452011	0.159218	0.222	DecIR
ENSMUSG00000029713,chr5:137529910-137530182	Gnb2,chr5:137529910-137530182	ENSMUSG00000029713	Gnb2	0.000228955	0.00314527	0.398	DecIR
ENSMUSG00000030530,chr7:80397251-80397896	Furin,chr7:80397251-80397896	ENSMUSG00000030530	Furin	1.54416e-07	7.06945e-06	0.567	DecIR
ENSMUSG00000034438,chr5:105017886-105018560	Gbp8,chr5:105017886-105018560	ENSMUSG00000034438	Gbp8	1.12385e-07	5.61412e-06	0.582	DecIR
ENSMUSG00000025237,chr9:59624013-59624371	Parp6,chr9:59624013-59624371	ENSMUSG00000025237	Parp6	0.0206732	0.0934973	0.286	DecIR
ENSMUSG00000068735,chr2:93198992-93199355	Trp53i11,chr2:93198992-93199355	ENSMUSG00000068735	Trp53i11	0.00225671	0.0243149	0.481	DecIR
ENSMUSG00000098950,chr2:156078234-156078330	Gm28036,chr2:156078234-156078330	ENSMUSG00000098950	Gm28036	2.67048e-07	8.90056e-06	0.563	DecIR
ENSMUSG00000014353,chr2:128845535-128846727	Tmem87b,chr2:128845535-128846727	ENSMUSG00000014353	Tmem87b	2.61235e-13	6.22269e-11	0.786	DecIR
ENSMUSG00000024560,chr18:74219239-74219381	Cxxc1,chr18:74219239-74219381	ENSMUSG00000024560	Cxxc1	0.00692126	0.0493747	0.167	DecIR
ENSMUSG00000074129,chr7:45127093-45127207	Rpl13a,chr7:45127093-45127207	ENSMUSG00000074129	Rpl13a	0	0	0.948	DecIR
ENSMUSG00000029472,chr5:122799475-122800449	Anapc5,chr5:122799475-122800449	ENSMUSG00000029472	Anapc5	0.000896584	0.0107103	0.167	DecIR
ENSMUSG00000054405,chr4:132544123-132544655	Dnajc8,chr4:132544123-132544655	ENSMUSG00000054405	Dnajc8	0.0165846	0.0806479	0.25	DecIR
ENSMUSG00000000787,chrX:13287384-13287462	Ddx3x,chrX:13287384-13287462	ENSMUSG00000000787	Ddx3x	0	0	0.955	DecIR
ENSMUSG00000001305,chr1:186737686-186739602	Rrp15,chr1:186737686-186739602	ENSMUSG00000001305	Rrp15	0.0198371	0.0916009	0.308	DecIR
ENSMUSG00000031066,chrX:20716954-20717753	Usp11,chrX:20716954-20717753	ENSMUSG00000031066	Usp11	0.0287549	0.111048	0.278	DecIR
ENSMUSG00000026869,chr2:34865656-34865980	Psmd5,chr2:34865656-34865980	ENSMUSG00000026869	Psmd5	0.00689354	0.0493747	0.333	DecIR
ENSMUSG00000053158,chr7:80384018-80384189	Fes,chr7:80384018-80384189	ENSMUSG00000053158	Fes	0.000673723	0.0082269	0.345	DecIR
ENSMUSG00000025888,chr9:5303775-5304185	Casp1,chr9:5303775-5304185	ENSMUSG00000025888	Casp1	0.0409186	0.146959	0.296	DecIR
ENSMUSG00000034610,chr4:108557475-108558713	Tut4,chr4:108557475-108558713	ENSMUSG00000034610	Tut4	0.0116936	0.0665871	0.357	DecIR
ENSMUSG00000025647,chr9:109056094-109056285	Shisa5,chr9:109056094-109056285	ENSMUSG00000025647	Shisa5	0.0492657	0.171339	0.045	DecIR
ENSMUSG00000025138,chr11:120619050-120620161	Sirt7,chr11:120619050-120620161	ENSMUSG00000025138	Sirt7	0.0121404	0.0677275	0.267	DecIR
ENSMUSG00000025138,chr11:120620505-120620645	Sirt7,chr11:120620505-120620645	ENSMUSG00000025138	Sirt7	0.0419124	0.149551	0.216	DecIR
ENSMUSG00000017756,chr13:73784614-73785042	Slc12a7,chr13:73784614-73785042	ENSMUSG00000017756	Slc12a7	0.0283626	0.11056	0.495	DecIR
ENSMUSG00000002504,chr17:24641973-24642189	Slc9a3r2,chr17:24641973-24642189	ENSMUSG00000002504	Slc9a3r2	1.15097e-12	1.58114e-10	0.818	DecIR
ENSMUSG00000048865,chr1:171404138-171404219	Arhgap30,chr1:171404138-171404219	ENSMUSG00000048865	Arhgap30	0.00479076	0.0395868	0.26	DecIR
ENSMUSG00000039176,chr7:79452029-79452105	Polg,chr7:79452029-79452105	ENSMUSG00000039176	Polg	2.34894e-06	4.96439e-05	0.349	DecIR
ENSMUSG00000097195,chr9:88521717-88521916	Snhg5,chr9:88521717-88521916	ENSMUSG00000097195	Snhg5	3.29514e-07	9.57369e-06	0.525	DecIR
ENSMUSG00000028923,chr4:141073590-141073673	Necap2,chr4:141073590-141073673	ENSMUSG00000028923	Necap2	0.016015	0.0785737	0.333	DecIR
ENSMUSG00000033416,chr10:75509834-75510030	Gucd1,chr10:75509834-75510030	ENSMUSG00000033416	Gucd1	0.0134563	0.072139	0.281	DecIR
ENSMUSG00000049482,chr8:122481006-122481131	Ctu2,chr8:122481006-122481131	ENSMUSG00000049482	Ctu2	0.00234706	0.0250429	0.311	DecIR
ENSMUSG00000030120,chr6:124932177-124932409	Mlf2,chr6:124932177-124932409	ENSMUSG00000030120	Mlf2	0.0112803	0.0655929	0.303	DecIR
ENSMUSG00000030330,chr6:125047941-125048174	Ing4,chr6:125047941-125048174	ENSMUSG00000030330	Ing4	3.63352e-06	7.13078e-05	0.472	DecIR
ENSMUSG00000018567,chr11:69992444-69992580	Gabarap,chr11:69992444-69992580	ENSMUSG00000018567	Gabarap	0.0354835	0.130826	0.317	DecIR
ENSMUSG00000031985,chr8:124886780-124886851	Gnpat,chr8:124886780-124886851	ENSMUSG00000031985	Gnpat	0.0236599	0.101969	0.159	DecIR
ENSMUSG00000019254,chr7:4483558-4483641	Ppp1r12c,chr7:4483558-4483641	ENSMUSG00000019254	Ppp1r12c	0.00774062	0.052512	0.432	DecIR
ENSMUSG00000053907,chr6:72434396-72434979	Mat2a,chr6:72434396-72434979	ENSMUSG00000053907	Mat2a	3.08369e-07	9.41383e-06	0.269	DecIR
ENSMUSG00000047098,chr14:55596859-55598636	Rnf31,chr14:55596859-55598636	ENSMUSG00000047098	Rnf31	0.00951181	0.0600774	0.461	DecIR
ENSMUSG00000005566,chr7:13029125-13029205	Trim28,chr7:13029125-13029205	ENSMUSG00000005566	Trim28	0.00371256	0.0345771	0.214	DecIR
ENSMUSG00000002763,chr17:46723736-46723917	Pex6,chr17:46723736-46723917	ENSMUSG00000002763	Pex6	9.43912e-13	1.48194e-10	0.663	DecIR
ENSMUSG00000006024,chr7:16113406-16113474	Napa,chr7:16113406-16113474	ENSMUSG00000006024	Napa	0.000299193	0.00388747	0.457	DecIR
ENSMUSG00000002981,chr7:19638238-19638930	Clptm1,chr7:19638238-19638930	ENSMUSG00000002981	Clptm1	0.0496309	0.171436	0.267	DecIR
ENSMUSG00000020812,chr11:116672356-116672662	Snhg16,chr11:116672356-116672662	ENSMUSG00000020812	Snhg16	0.0169215	0.0812086	0.292	DecIR
ENSMUSG00000089832,chr7:27355447-27355571	Shkbp1,chr7:27355447-27355571	ENSMUSG00000089832	Shkbp1	0.000498255	0.00622252	0.533	DecIR
ENSMUSG00000040466,chr7:27459421-27459561	Blvrb,chr7:27459421-27459561	ENSMUSG00000040466	Blvrb	2.91339e-07	9.3469e-06	0.558	DecIR
ENSMUSG00000038644,chr7:44535193-44535697	Pold1,chr7:44535193-44535697	ENSMUSG00000038644	Pold1	7.65214e-05	0.00120139	0.363	DecIR
ENSMUSG00000030214,chr6:136617068-136617200	Plbd1,chr6:136617068-136617200	ENSMUSG00000030214	Plbd1	8.17725e-07	1.99707e-05	0.564	DecIR
ENSMUSG00000033685,chr7:100494376-100496724	Ucp2,chr7:100494376-100496724	ENSMUSG00000033685	Ucp2	0.00893601	0.0577687	0.346	DecIR
ENSMUSG00000030890,chr7:105740868-105740958	Ilk,chr7:105740868-105740958	ENSMUSG00000030890	Ilk	0.0384804	0.140933	0.319	DecIR
ENSMUSG00000028059,chr3:88633043-88633256	Arhgef2,chr3:88633043-88633256	ENSMUSG00000028059	Arhgef2	0.0217755	0.0961094	0.286	DecIR
ENSMUSG00000057193,chr9:21342506-21342596	Slc44a2,chr9:21342506-21342596	ENSMUSG00000057193	Slc44a2	0.0475663	0.166482	0.285	DecIR
ENSMUSG00000000131,chr7:126107233-126108450	Xpo6,chr7:126107233-126108450	ENSMUSG00000000131	Xpo6	0.00869049	0.0568503	0.286	DecIR
ENSMUSG00000015757,chr10:7797876-7798413	Ppil4,chr10:7797876-7798413	ENSMUSG00000015757	Ppil4	0.028973	0.111333	0.238	DecIR
ENSMUSG00000015656,chr9:40802624-40802737	Hspa8,chr9:40802624-40802737	ENSMUSG00000015656	Hspa8	0.0143892	0.073781	0.337	DecIR
ENSMUSG00000040940,chr7:24912156-24912308	Arhgef1,chr7:24912156-24912308	ENSMUSG00000040940	Arhgef1	0.0171644	0.0813092	0.121	DecIR
ENSMUSG00000040940,chr7:24924884-24924974	Arhgef1,chr7:24924884-24924974	ENSMUSG00000040940	Arhgef1	0.0035465	0.0333128	0.593	DecIR
ENSMUSG00000034893,chr14:75707189-75707920	Cog3,chr14:75707189-75707920	ENSMUSG00000034893	Cog3	0.0135336	0.0722011	0.314	DecIR
ENSMUSG00000032480,chr9:110084869-110084948	Dhx30,chr9:110084869-110084948	ENSMUSG00000032480	Dhx30	0.02578	0.107319	0.196	DecIR
ENSMUSG00000032480,chr9:110092437-110092856	Dhx30,chr9:110092437-110092856	ENSMUSG00000032480	Dhx30	0.00696367	0.0493747	0.305	DecIR
ENSMUSG00000020263,chr10:83611067-83611141	Appl2,chr10:83611067-83611141	ENSMUSG00000020263	Appl2	0.0308752	0.116604	0.333	DecIR
ENSMUSG00000006390,chr4:118431515-118431595	Elovl1,chr4:118431515-118431595	ENSMUSG00000006390	Elovl1	9.81826e-08	5.13822e-06	0.556	DecIR
ENSMUSG00000021916,chr14:31011031-31011119	Glt8d1,chr14:31011031-31011119	ENSMUSG00000021916	Glt8d1	2.6726e-07	8.90056e-06	0.503	DecIR
ENSMUSG00000021832,chr14:45330910-45330985	Psmc6,chr14:45330910-45330985	ENSMUSG00000021832	Psmc6	0.0254273	0.106486	0.222	DecIR
ENSMUSG00000021866,chr14:25874305-25874669	Anxa11,chr14:25874305-25874669	ENSMUSG00000021866	Anxa11	0.0077085	0.052512	0.321	DecIR
ENSMUSG00000031864,chr8:68796821-68797757	Ints10,chr8:68796821-68797757	ENSMUSG00000031864	Ints10	0.0279575	0.11056	0.256	DecIR
ENSMUSG00000031862,chr8:69797152-69797223	Atp13a1,chr8:69797152-69797223	ENSMUSG00000031862	Atp13a1	1.61459e-06	3.69674e-05	0.476	DecIR
ENSMUSG00000021948,chr14:30607451-30607606	Prkcd,chr14:30607451-30607606	ENSMUSG00000021948	Prkcd	5.90175e-06	0.000109933	0.664	DecIR
ENSMUSG00000014856,chr8:105328459-105328606	Tmem208,chr8:105328459-105328606	ENSMUSG00000014856	Tmem208	0.0077289	0.052512	0.24	DecIR
ENSMUSG00000032228,chr9:71868279-71870072	Tcf12,chr9:71868279-71870072	ENSMUSG00000032228	Tcf12	0.0240314	0.102765	0.3	DecIR
ENSMUSG00000021546,chr13:58393775-58393851	Hnrnpk,chr13:58393775-58393851	ENSMUSG00000021546	Hnrnpk	3.85333e-07	1.05055e-05	0.541	DecIR
ENSMUSG00000084786,chr9:20645260-20645404	Ubl5,chr9:20645260-20645404	ENSMUSG00000084786	Ubl5	6.45793e-06	0.000114472	0.757	DecIR
ENSMUSG00000032359,chr9:90067109-90068403	Ctsh,chr9:90067109-90068403	ENSMUSG00000032359	Ctsh	1.70295e-07	7.06945e-06	0.375	DecIR
ENSMUSG00000036622,chr4:141002547-141002622	Atp13a2,chr4:141002547-141002622	ENSMUSG00000036622	Atp13a2	0.00809295	0.0542326	0.232	DecIR
ENSMUSG00000023249,chr9:106473520-106473679	Parp3,chr9:106473520-106473679	ENSMUSG00000023249	Parp3	0.00665374	0.0488537	0.08	DecIR
ENSMUSG00000010048,chr9:107590423-107590503	Ifrd2,chr9:107590423-107590503	ENSMUSG00000010048	Ifrd2	7.31148e-05	0.00116454	0.317	DecIR
ENSMUSG00000020385,chr11:51275579-51275768	Clk4,chr11:51275579-51275768	ENSMUSG00000020385	Clk4	0.0216148	0.0961094	0.208	DecIR
ENSMUSG00000020888,chr11:70004875-70005153	Dvl2,chr11:70004875-70005153	ENSMUSG00000020888	Dvl2	0.00877431	0.057059	0.397	DecIR
ENSMUSG00000018287,chr11:70664477-70664576	Spag7,chr11:70664477-70664576	ENSMUSG00000018287	Spag7	0.0142082	0.0736741	0.156	DecIR
ENSMUSG00000040463,chr11:72446062-72446156	Mybbp1a,chr11:72446062-72446156	ENSMUSG00000040463	Mybbp1a	0.0137637	0.0730741	0.3	DecIR
ENSMUSG00000020745,chr11:74684509-74685894	Pafah1b1,chr11:74684509-74685894	ENSMUSG00000020745	Pafah1b1	0.0392521	0.14237	0.363	DecIR
ENSMUSG00000024194,chr17:26938468-26938570	Cuta,chr17:26938468-26938570	ENSMUSG00000024194	Cuta	0.00206292	0.0226714	0.544	DecIR
ENSMUSG00000020516,chr11:86511667-86511823	Rps6kb1,chr11:86511667-86511823	ENSMUSG00000020516	Rps6kb1	0.00716118	0.0501282	0.222	DecIR
ENSMUSG00000031388,chrX:73919547-73919752	Naa10,chrX:73919547-73919752	ENSMUSG00000031388	Naa10	0.0157909	0.0781721	0.235	DecIR
ENSMUSG00000022214,chr14:55565167-55565482	Dcaf11,chr14:55565167-55565482	ENSMUSG00000022214	Dcaf11	5.69202e-06	0.000107854	0.433	DecIR
ENSMUSG00000020708,chr11:106262503-106262579	Psmc5,chr11:106262503-106262579	ENSMUSG00000020708	Psmc5	2.59834e-05	0.00043932	0.361	DecIR
ENSMUSG00000020775,chr11:116135117-116135189	Mrpl38,chr11:116135117-116135189	ENSMUSG00000020775	Mrpl38	1.34097e-05	0.000230269	0.33	DecIR
ENSMUSG00000025155,chr11:120793111-120793832	Dus1l,chr11:120793111-120793832	ENSMUSG00000025155	Dus1l	3.23188e-05	0.000530124	0.413	DecIR
ENSMUSG00000021488,chr13:55213318-55214059	Nsd1,chr13:55213318-55214059	ENSMUSG00000021488	Nsd1	0.0301932	0.114422	0.267	DecIR

## Sheet: S7
Supplementary Table 7. List of differentially intron retention loci between GC and MG in the lymph node of RIKEN data
Locus (ensembl id)	Locus (ensemble id)	ensembl id	symbol	Pvalue	FDR	IncLevel	IR
ENSMUSG00000025225,chr19:46306365-46306484	Nfkb2,chr19:46306365-46306484	ENSMUSG00000025225	Nfkb2	0.037055	0.130725	-0.338	IncIR
ENSMUSG00000024725,chr19:18584744-18586545	Ostf1,chr19:18584744-18586545	ENSMUSG00000024725	Ostf1	0.0440779	0.148116	-0.126	IncIR
ENSMUSG00000036372,chr19:10206534-10207162	Tmem258,chr19:10206534-10207162	ENSMUSG00000036372	Tmem258	0.0112345	0.0634513	-0.353	IncIR
ENSMUSG00000024965,chr19:7001882-7002211	Fermt3,chr19:7001882-7002211	ENSMUSG00000024965	Fermt3	1.52018e-07	6.77323e-06	-0.446	IncIR
ENSMUSG00000024948,chr19:6343884-6343970	Map4k2,chr19:6343884-6343970	ENSMUSG00000024948	Map4k2	0.0170175	0.0779079	-0.345	IncIR
ENSMUSG00000054874,chr19:5686667-5687117	Pcnx3,chr19:5686667-5687117	ENSMUSG00000054874	Pcnx3	0.0493146	0.160525	-0.079	IncIR
ENSMUSG00000024824,chr19:4197587-4197669	Rad9a,chr19:4197587-4197669	ENSMUSG00000024824	Rad9a	0.00184762	0.0193278	-0.323	IncIR
ENSMUSG00000024454,chr18:37941111-37941377	Hdac3,chr18:37941111-37941377	ENSMUSG00000024454	Hdac3	0.0016749	0.0183227	-0.313	IncIR
ENSMUSG00000024454,chr18:37943752-37944127	Hdac3,chr18:37943752-37944127	ENSMUSG00000024454	Hdac3	0.0047046	0.0382408	-0.213	IncIR
ENSMUSG00000038773,chr18:34794564-34795673	Kdm3b,chr18:34794564-34795673	ENSMUSG00000038773	Kdm3b	0.011038	0.0626355	-0.303	IncIR
ENSMUSG00000035842,chr17:66149314-66149966	Ddx11,chr17:66149314-66149966	ENSMUSG00000035842	Ddx11	0.00156326	0.0175757	-0.319	IncIR
ENSMUSG00000013787,chr17:34905712-34905908	Ehmt2,chr17:34905712-34905908	ENSMUSG00000013787	Ehmt2	0.0396285	0.138183	-0.201	IncIR
ENSMUSG00000024217,chr17:27848058-27851636	Snrpc,chr17:27848058-27851636	ENSMUSG00000024217	Snrpc	0.0496309	0.160932	-0.267	IncIR
ENSMUSG00000024180,chr17:26118430-26118860	Tmem8,chr17:26118430-26118860	ENSMUSG00000024180	Tmem8	0.0292967	0.107997	-0.256	IncIR
ENSMUSG00000025737,chr17:25827357-25827426	Wdr24,chr17:25827357-25827426	ENSMUSG00000025737	Wdr24	0.0130508	0.0691634	-0.556	IncIR
ENSMUSG00000024160,chr17:24890756-24890831	Spsb3,chr17:24890756-24890831	ENSMUSG00000024160	Spsb3	0.0140632	0.0713843	-0.281	IncIR
ENSMUSG00000024319,chr17:33960096-33960185	Vps52,chr17:33960096-33960185	ENSMUSG00000024319	Vps52	3.66833e-09	2.59588e-07	-0.667	IncIR
ENSMUSG00000022978,chr16:90719979-90720652	Mis18a,chr16:90719979-90720652	ENSMUSG00000022978	Mis18a	0.0312052	0.113757	-0.065	IncIR
ENSMUSG00000022515,chr16:4947759-4948224	Anks3,chr16:4947759-4948224	ENSMUSG00000022515	Anks3	1.81918e-05	0.000358765	-0.301	IncIR
ENSMUSG00000022999,chr15:98908760-98908847	Lmbr1l,chr15:98908760-98908847	ENSMUSG00000022999	Lmbr1l	0.00700291	0.048063	-0.182	IncIR
ENSMUSG00000003360,chr15:98650290-98650591	Ddx23,chr15:98650290-98650591	ENSMUSG00000003360	Ddx23	0.0450863	0.150663	-0.253	IncIR
ENSMUSG00000022394,chr15:81667397-81668628	L3mbtl2,chr15:81667397-81668628	ENSMUSG00000022394	L3mbtl2	0.0292007	0.107997	-0.333	IncIR
ENSMUSG00000115987,chr15:76623495-76624084	Vps28,chr15:76623495-76624084	ENSMUSG00000115987	Vps28	0.00499292	0.0391611	-0.252	IncIR
ENSMUSG00000004789,chr12:85118415-85118525	Dlst,chr12:85118415-85118525	ENSMUSG00000004789	Dlst	0.00445196	0.0367744	-0.205	IncIR
ENSMUSG00000060073,chr12:70984595-70984670	Psma3,chr12:70984595-70984670	ENSMUSG00000060073	Psma3	0.00277026	0.0260361	-0.24	IncIR
ENSMUSG00000015363,chr15:89085638-89085754	Trabd,chr15:89085638-89085754	ENSMUSG00000015363	Trabd	0.0283442	0.107905	-0.278	IncIR
ENSMUSG00000028034,chr3:152232023-152234522	Fubp1,chr3:152232023-152234522	ENSMUSG00000028034	Fubp1	0.0374311	0.131666	-0.148	IncIR
ENSMUSG00000052142,chr17:32403400-32403519	Rasal3,chr17:32403400-32403519	ENSMUSG00000052142	Rasal3	0.00109311	0.0131501	-0.069	IncIR
ENSMUSG00000066621,chr5:144217026-144217224	Tecpr1,chr5:144217026-144217224	ENSMUSG00000066621	Tecpr1	0.0181419	0.0820478	-0.139	IncIR
ENSMUSG00000036948,chr5:138260990-138261551	Map11,chr5:138260990-138261551	ENSMUSG00000036948	Map11	2.11077e-06	5.40268e-05	-0.447	IncIR
ENSMUSG00000038671,chr2:181361072-181361389	Arfrp1,chr2:181361072-181361389	ENSMUSG00000038671	Arfrp1	0.0246449	0.0982246	-0.175	IncIR
ENSMUSG00000007850,chr11:50379965-50382535	Hnrnph1,chr11:50379965-50382535	ENSMUSG00000007850	Hnrnph1	0.00645094	0.0461933	-0.058	IncIR
ENSMUSG00000029060,chr4:155657070-155657164	Mib2,chr4:155657070-155657164	ENSMUSG00000029060	Mib2	0.0357925	0.127016	-0.114	IncIR
ENSMUSG00000053841,chr4:129631355-129631589	Txlna,chr4:129631355-129631589	ENSMUSG00000053841	Txlna	0.0203537	0.087392	-0.267	IncIR
ENSMUSG00000035953,chr14:50929059-50929200	Pip4p1,chr14:50929059-50929200	ENSMUSG00000035953	Pip4p1	0.00492977	0.0390254	-0.156	IncIR
ENSMUSG00000044573,chr12:30904984-30905067	Acp1,chr12:30904984-30905067	ENSMUSG00000044573	Acp1	0.0037444	0.0331214	-0.556	IncIR
ENSMUSG00000013858,chr10:79978063-79978186	Tmem259,chr10:79978063-79978186	ENSMUSG00000013858	Tmem259	0.0109905	0.0626355	-0.182	IncIR
ENSMUSG00000042524,chr15:79728582-79729031	Sun2,chr15:79728582-79729031	ENSMUSG00000042524	Sun2	0.0417824	0.141989	-0.319	IncIR
ENSMUSG00000024914,chr19:5423420-5423558	Drap1,chr19:5423420-5423558	ENSMUSG00000024914	Drap1	0.00354806	0.0316171	-0.333	IncIR
ENSMUSG00000039701,chr3:122961238-122961317	Usp53,chr3:122961238-122961317	ENSMUSG00000039701	Usp53	0.0409163	0.140673	-0.296	IncIR
ENSMUSG00000028107,chr3:95748634-95750337	Tars2,chr3:95748634-95750337	ENSMUSG00000028107	Tars2	0.00139836	0.0163323	-0.274	IncIR
ENSMUSG00000064068,chr3:89212763-89212875	Mtx1,chr3:89212763-89212875	ENSMUSG00000064068	Mtx1	0.0168002	0.0779079	-0.292	IncIR
ENSMUSG00000020048,chr10:86691749-86692138	Hsp90b1,chr10:86691749-86692138	ENSMUSG00000020048	Hsp90b1	0.0230755	0.0944716	-0.066	IncIR
ENSMUSG00000028064,chr3:88451451-88451686	Sema4a,chr3:88451451-88451686	ENSMUSG00000028064	Sema4a	0.00885718	0.0551499	-0.212	IncIR
ENSMUSG00000023764,chr11:3134731-3135281	Sfi1,chr11:3134731-3135281	ENSMUSG00000023764	Sfi1	0.0172248	0.0784904	-0.292	IncIR
ENSMUSG00000038828,chr5:30872769-30873041	Tmem214,chr5:30872769-30873041	ENSMUSG00000038828	Tmem214	0.000608614	0.00789246	-0.43	IncIR
ENSMUSG00000031389,chrX:73900184-73900276	Arhgap4,chrX:73900184-73900276	ENSMUSG00000031389	Arhgap4	4.59195e-05	0.000824495	-0.101	IncIR
ENSMUSG00000002014,chrX:73787307-73788833	Ssr4,chrX:73787307-73788833	ENSMUSG00000002014	Ssr4	0.0275212	0.105543	-0.238	IncIR
ENSMUSG00000006498,chr10:79859523-79859600	Ptbp1,chr10:79859523-79859600	ENSMUSG00000006498	Ptbp1	0.00010708	0.00178913	-0.598	IncIR
ENSMUSG00000005823,chr17:57237324-57237422	Gpr108,chr17:57237324-57237422	ENSMUSG00000005823	Gpr108	0.000231841	0.00353044	-0.573	IncIR
ENSMUSG00000027247,chr2:91669462-91669650	Arhgap1,chr2:91669462-91669650	ENSMUSG00000027247	Arhgap1	2.07808e-05	0.000403214	-0.42	IncIR
ENSMUSG00000027009,chr2:79288868-79289235	Itga4,chr2:79288868-79289235	ENSMUSG00000027009	Itga4	0.00427664	0.0357278	-0.32	IncIR
ENSMUSG00000030824,chr7:45495315-45495553	Nucb1,chr7:45495315-45495553	ENSMUSG00000030824	Nucb1	4.25023e-08	2.43478e-06	-0.629	IncIR
ENSMUSG00000053332,chr1:161037548-161037993	Gas5,chr1:161037548-161037993	ENSMUSG00000053332	Gas5	0.0414458	0.141244	-0.26	IncIR
ENSMUSG00000006005,chr1:150447631-150449141	Tpr,chr1:150447631-150449141	ENSMUSG00000006005	Tpr	0.0069118	0.048063	-0.278	IncIR
ENSMUSG00000035941,chr9:85715417-85717549	Ibtk,chr9:85715417-85717549	ENSMUSG00000035941	Ibtk	7.77156e-16	2.3373e-13	-0.927	IncIR
ENSMUSG00000026360,chr1:144002842-144002950	Rgs2,chr1:144002842-144002950	ENSMUSG00000026360	Rgs2	0.0137098	0.0709423	-0.281	IncIR
ENSMUSG00000021901,chr14:31256792-31257287	Bap1,chr14:31256792-31257287	ENSMUSG00000021901	Bap1	1.22627e-05	0.000254345	-0.595	IncIR
ENSMUSG00000073725,chr1:24743948-24744254	Lmbrd1,chr1:24743948-24744254	ENSMUSG00000073725	Lmbrd1	0.00943306	0.057025	-0.19	IncIR
ENSMUSG00000036833,chr2:25002716-25002887	Pnpla7,chr2:25002716-25002887	ENSMUSG00000036833	Pnpla7	0.00321912	0.0295618	-0.476	IncIR
ENSMUSG00000026721,chr1:160740800-160740882	Rabgap1l,chr1:160740800-160740882	ENSMUSG00000026721	Rabgap1l	0.00216027	0.0213016	-0.08	IncIR
ENSMUSG00000032413,chr9:96566123-96568362	Rasa2,chr9:96566123-96568362	ENSMUSG00000032413	Rasa2	0.00488792	0.0390254	-0.622	IncIR
ENSMUSG00000020863,chr11:94293033-94293136	Luc7l3,chr11:94293033-94293136	ENSMUSG00000020863	Luc7l3	0.0493718	0.160525	-0.075	IncIR
ENSMUSG00000028656,chr4:122862747-122862899	Cap1,chr4:122862747-122862899	ENSMUSG00000028656	Cap1	0.00173044	0.0185307	-0.399	IncIR
ENSMUSG00000024835,chr19:4150220-4150438	Coro1b,chr19:4150220-4150438	ENSMUSG00000024835	Coro1b	0.0137493	0.0709423	-0.235	IncIR
ENSMUSG00000063108,chr9:20444368-20444892	Zfp26,chr9:20444368-20444892	ENSMUSG00000063108	Zfp26	0.0294455	0.107997	-0.318	IncIR
ENSMUSG00000028245,chr4:6420141-6421055	Nsmaf,chr4:6420141-6421055	ENSMUSG00000028245	Nsmaf	0.00941931	0.057025	-0.429	IncIR
ENSMUSG00000039157,chr2:32558348-32560037	Fam102a,chr2:32558348-32560037	ENSMUSG00000039157	Fam102a	3.9181e-05	0.000725151	-0.276	IncIR
ENSMUSG00000034432,chr1:90604446-90605462	Cops8,chr1:90604446-90605462	ENSMUSG00000034432	Cops8	0.0141639	0.0715933	-0.259	IncIR
ENSMUSG00000025982,chr1:55014563-55016374	Sf3b1,chr1:55014563-55016374	ENSMUSG00000025982	Sf3b1	0.000372996	0.00527899	-0.106	IncIR
ENSMUSG00000029713,chr5:137529206-137529441	Gnb2,chr5:137529206-137529441	ENSMUSG00000029713	Gnb2	0.0365525	0.129331	-0.332	IncIR
ENSMUSG00000029713,chr5:137529910-137530182	Gnb2,chr5:137529910-137530182	ENSMUSG00000029713	Gnb2	0.00163629	0.0182264	-0.397	IncIR
ENSMUSG00000035086,chr11:101289926-101290437	Becn1,chr11:101289926-101290437	ENSMUSG00000035086	Becn1	0.0464293	0.153026	-0.313	IncIR
ENSMUSG00000026339,chr1:121494434-121496982	Ccdc93,chr1:121494434-121496982	ENSMUSG00000026339	Ccdc93	0.0139507	0.0711133	-0.296	IncIR
ENSMUSG00000036438,chr17:87435711-87435789	Calm2,chr17:87435711-87435789	ENSMUSG00000036438	Calm2	0.000584477	0.00781251	-0.599	IncIR
ENSMUSG00000028954,chr5:24694762-24695518	Nub1,chr5:24694762-24695518	ENSMUSG00000028954	Nub1	0.00846304	0.0537186	-0.267	IncIR
ENSMUSG00000002108,chr2:91190285-91190460	Nr1h3,chr2:91190285-91190460	ENSMUSG00000002108	Nr1h3	0.00171413	0.0185307	-0.303	IncIR
ENSMUSG00000002108,chr2:91190642-91190737	Nr1h3,chr2:91190642-91190737	ENSMUSG00000002108	Nr1h3	0.0144469	0.0724152	-0.296	IncIR
ENSMUSG00000068735,chr2:93198992-93199355	Trp53i11,chr2:93198992-93199355	ENSMUSG00000068735	Trp53i11	0.0156909	0.0761135	-0.344	IncIR
ENSMUSG00000098950,chr2:156078234-156078330	Gm28036,chr2:156078234-156078330	ENSMUSG00000098950	Gm28036	1.59327e-06	4.56357e-05	-0.588	IncIR
ENSMUSG00000021819,chr14:20721660-20721868	Zswim8,chr14:20721660-20721868	ENSMUSG00000021819	Zswim8	0.0104439	0.0604344	-0.151	IncIR
ENSMUSG00000021819,chr14:20722580-20722826	Zswim8,chr14:20722580-20722826	ENSMUSG00000021819	Zswim8	4.47103e-05	0.000814946	-0.299	IncIR
ENSMUSG00000027433,chr2:147029785-147029867	Xrn2,chr2:147029785-147029867	ENSMUSG00000027433	Xrn2	8.78421e-08	4.59452e-06	-0.475	IncIR
ENSMUSG00000074129,chr7:45127093-45127207	Rpl13a,chr7:45127093-45127207	ENSMUSG00000074129	Rpl13a	0.0133947	0.0704863	-0.334	IncIR
ENSMUSG00000029472,chr5:122791756-122791825	Anapc5,chr5:122791756-122791825	ENSMUSG00000029472	Anapc5	0.00389026	0.033675	-0.244	IncIR
ENSMUSG00000000787,chrX:13287384-13287462	Ddx3x,chrX:13287384-13287462	ENSMUSG00000000787	Ddx3x	0.04091	0.140673	-0.296	IncIR
ENSMUSG00000019139,chr8:70595272-70595359	Isyna1,chr8:70595272-70595359	ENSMUSG00000019139	Isyna1	0.0245792	0.0982246	-0.175	IncIR
ENSMUSG00000079197,chr14:55587741-55588038	Psme2,chr14:55587741-55588038	ENSMUSG00000079197	Psme2	0.000146766	0.00235413	-0.6	IncIR
ENSMUSG00000026869,chr2:34865656-34865980	Psmd5,chr2:34865656-34865980	ENSMUSG00000026869	Psmd5	0.000244083	0.0036704	-0.36	IncIR
ENSMUSG00000034928,chr13:54684087-54684336	Rnf44,chr13:54684087-54684336	ENSMUSG00000034928	Rnf44	0.00220274	0.0215439	-0.154	IncIR
ENSMUSG00000024137,chr17:24444338-24444412	E4f1,chr17:24444338-24444412	ENSMUSG00000024137	E4f1	0.0212353	0.0890107	-0.356	IncIR
ENSMUSG00000058407,chr1:37994111-37995631	Txndc9,chr1:37994111-37995631	ENSMUSG00000058407	Txndc9	0.0183733	0.0823449	-0.175	IncIR
ENSMUSG00000025236,chr9:59310349-59313038	Adpgk,chr9:59310349-59313038	ENSMUSG00000025236	Adpgk	0.0246582	0.0982246	-0.185	IncIR
ENSMUSG00000026289,chr1:87785997-87786239	Atg16l1,chr1:87785997-87786239	ENSMUSG00000026289	Atg16l1	0.000212953	0.00328439	-0.476	IncIR
ENSMUSG00000097195,chr9:88521449-88521648	Snhg5,chr9:88521449-88521648	ENSMUSG00000097195	Snhg5	0.0158254	0.0761516	-0.528	IncIR
ENSMUSG00000045411,chr7:44250341-44250611	2410002F23Rik,chr7:44250341-44250611	ENSMUSG00000045411	2410002F23Rik	0.000295543	0.00433583	-0.391	IncIR
ENSMUSG00000037447,chr1:36317325-36317608	Arid5a,chr1:36317325-36317608	ENSMUSG00000037447	Arid5a	0.014913	0.0736075	-0.259	IncIR
ENSMUSG00000070034,chr1:85579200-85579642	Sp110,chr1:85579200-85579642	ENSMUSG00000070034	Sp110	8.26317e-11	7.64661e-09	-0.529	IncIR
ENSMUSG00000030120,chr6:124932177-124932409	Mlf2,chr6:124932177-124932409	ENSMUSG00000030120	Mlf2	0.0101783	0.0602726	-0.317	IncIR
ENSMUSG00000029599,chr5:120624730-120625700	Ddx54,chr5:120624730-120625700	ENSMUSG00000029599	Ddx54	1.75184e-06	4.7897e-05	-0.447	IncIR
ENSMUSG00000004865,chr17:28599870-28600241	Srpk1,chr17:28599870-28600241	ENSMUSG00000004865	Srpk1	1.49806e-07	6.77323e-06	-0.407	IncIR
ENSMUSG00000031985,chr8:124886780-124886851	Gnpat,chr8:124886780-124886851	ENSMUSG00000031985	Gnpat	0.00196007	0.0200187	-0.217	IncIR
ENSMUSG00000035278,chr10:80796655-80796730	Plekhj1,chr10:80796655-80796730	ENSMUSG00000035278	Plekhj1	0.000909934	0.0110571	-0.432	IncIR
ENSMUSG00000089832,chr7:27355447-27355571	Shkbp1,chr7:27355447-27355571	ENSMUSG00000089832	Shkbp1	0.000182737	0.00285497	-0.524	IncIR
ENSMUSG00000030468,chr7:43409522-43410507	Siglecg,chr7:43409522-43410507	ENSMUSG00000030468	Siglecg	0.00072154	0.0090418	-0.173	IncIR
ENSMUSG00000059552,chr11:69587633-69588362	Trp53,chr11:69587633-69588362	ENSMUSG00000059552	Trp53	0.0096699	0.0578751	-0.2	IncIR
ENSMUSG00000095567,chr4:156237518-156237598	Noc2l,chr4:156237518-156237598	ENSMUSG00000095567	Noc2l	0.00916498	0.0562524	-0.182	IncIR
ENSMUSG00000028059,chr3:88633043-88633256	Arhgef2,chr3:88633043-88633256	ENSMUSG00000028059	Arhgef2	1.41517e-05	0.000283741	-0.414	IncIR
ENSMUSG00000030816,chr7:127597342-127597415	Rnf40,chr7:127597342-127597415	ENSMUSG00000030816	Rnf40	0.00938248	0.057025	-0.267	IncIR
ENSMUSG00000040940,chr7:24912156-24912308	Arhgef1,chr7:24912156-24912308	ENSMUSG00000040940	Arhgef1	0.00260504	0.0248719	-0.395	IncIR
ENSMUSG00000040940,chr7:24923735-24923801	Arhgef1,chr7:24923735-24923801	ENSMUSG00000040940	Arhgef1	8.71949e-05	0.00149851	-0.577	IncIR
ENSMUSG00000032480,chr9:110092437-110092856	Dhx30,chr9:110092437-110092856	ENSMUSG00000032480	Dhx30	0.01041	0.0604344	-0.317	IncIR
ENSMUSG00000020156,chr10:80236182-80238313	Pwwp3a,chr10:80236182-80238313	ENSMUSG00000020156	Pwwp3a	2.19847e-06	5.50993e-05	-0.321	IncIR
ENSMUSG00000060216,chr11:70438029-70438317	Arrb2,chr11:70438029-70438317	ENSMUSG00000060216	Arrb2	0.000182163	0.00285497	-0.389	IncIR
ENSMUSG00000021832,chr14:45330910-45330985	Psmc6,chr14:45330910-45330985	ENSMUSG00000021832	Psmc6	9.6366e-08	4.83035e-06	-0.533	IncIR
ENSMUSG00000031939,chr9:15310410-15311525	Taf1d,chr9:15310410-15311525	ENSMUSG00000031939	Taf1d	0.0241111	0.0973345	-0.352	IncIR
ENSMUSG00000031805,chr8:71679845-71680433	Jak3,chr8:71679845-71680433	ENSMUSG00000031805	Jak3	0.00703166	0.048063	-0.16	IncIR
ENSMUSG00000021948,chr14:30605570-30605814	Prkcd,chr14:30605570-30605814	ENSMUSG00000021948	Prkcd	5.26488e-07	1.97927e-05	-0.267	IncIR
ENSMUSG00000021948,chr14:30607451-30607606	Prkcd,chr14:30607451-30607606	ENSMUSG00000021948	Prkcd	0.0148516	0.0736075	-0.369	IncIR
ENSMUSG00000025494,chr7:141091502-141091801	Sigirr,chr7:141091502-141091801	ENSMUSG00000025494	Sigirr	0.000371245	0.00527899	-0.262	IncIR
ENSMUSG00000014856,chr8:105328459-105328606	Tmem208,chr8:105328459-105328606	ENSMUSG00000014856	Tmem208	0.00830739	0.0537186	-0.222	IncIR
ENSMUSG00000031897,chr8:105937382-105937492	Psmb10,chr8:105937382-105937492	ENSMUSG00000031897	Psmb10	0.00599442	0.0439713	-0.253	IncIR
ENSMUSG00000022109,chr14:73516723-73517205	Med4,chr14:73516723-73517205	ENSMUSG00000022109	Med4	0.0134176	0.0704863	-0.259	IncIR
ENSMUSG00000062006,chr3:130729151-130729227	Rpl34,chr3:130729151-130729227	ENSMUSG00000062006	Rpl34	0.00127832	0.0150766	-0.326	IncIR
ENSMUSG00000033166,chr14:99087851-99088760	Dis3,chr14:99087851-99088760	ENSMUSG00000033166	Dis3	4.46007e-06	0.000103182	-0.512	IncIR
ENSMUSG00000037266,chr4:134925433-134926733	Rsrp1,chr4:134925433-134926733	ENSMUSG00000037266	Rsrp1	6.3963e-10	5.12983e-08	-0.187	IncIR
ENSMUSG00000032127,chr9:44353999-44354101	Vps11,chr9:44353999-44354101	ENSMUSG00000032127	Vps11	0.00480539	0.0387979	-0.213	IncIR
ENSMUSG00000032115,chr9:44387093-44387248	Hyou1,chr9:44387093-44387248	ENSMUSG00000032115	Hyou1	1.60982e-14	3.87324e-12	-0.912	IncIR
ENSMUSG00000025722,chr7:80891910-80892974	Wdr73,chr7:80891910-80892974	ENSMUSG00000025722	Wdr73	0.00630656	0.0454299	-0.299	IncIR
ENSMUSG00000029617,chr5:143998275-143998542	Ccz1,chr5:143998275-143998542	ENSMUSG00000029617	Ccz1	0.0170322	0.0779079	-0.292	IncIR
ENSMUSG00000010048,chr9:107590423-107590503	Ifrd2,chr9:107590423-107590503	ENSMUSG00000010048	Ifrd2	0.00506854	0.0391611	-0.294	IncIR
ENSMUSG00000025410,chr10:127277939-127278118	Dctn2,chr10:127277939-127278118	ENSMUSG00000025410	Dctn2	0.0204133	0.087392	-0.41	IncIR
ENSMUSG00000020477,chr11:5707410-5707485	Mrps24,chr11:5707410-5707485	ENSMUSG00000020477	Mrps24	8.01283e-07	2.60525e-05	-0.582	IncIR
ENSMUSG00000020385,chr11:51275579-51275768	Clk4,chr11:51275579-51275768	ENSMUSG00000020385	Clk4	0.0162494	0.0771497	-0.275	IncIR
ENSMUSG00000001588,chr11:69884866-69885391	Acap1,chr11:69884866-69885391	ENSMUSG00000001588	Acap1	0.000545084	0.00736782	-0.156	IncIR
ENSMUSG00000040667,chr11:70943998-70944110	Nup88,chr11:70943998-70944110	ENSMUSG00000040667	Nup88	0.0206524	0.0876583	-0.267	IncIR
ENSMUSG00000020745,chr11:74677743-74679456	Pafah1b1,chr11:74677743-74679456	ENSMUSG00000020745	Pafah1b1	0.0288624	0.107997	-0.103	IncIR
ENSMUSG00000025155,chr11:120793111-120793832	Dus1l,chr11:120793111-120793832	ENSMUSG00000025155	Dus1l	0.000130664	0.00213104	-0.344	IncIR
ENSMUSG00000054517,chr11:116127616-116127696	Trim65,chr11:116127616-116127696	ENSMUSG00000054517	Trim65	1.24951e-05	0.000254773	-0.356	IncIR
ENSMUSG00000021428,chr13:38043979-38045271	Riok1,chr13:38043979-38045271	ENSMUSG00000021428	Riok1	0.0328194	0.118209	-0.239	IncIR
ENSMUSG00000021486,chr13:55324445-55324525	Prelid1,chr13:55324445-55324525	ENSMUSG00000021486	Prelid1	0.0182127	0.0820595	-0.359	IncIR
ENSMUSG00000021494,chr13:55535805-55535884	Ddx41,chr13:55535805-55535884	ENSMUSG00000021494	Ddx41	0.0259629	0.102101	-0.222	IncIR
ENSMUSG00000024695,chr19:12776074-12776410	Zfp91,chr19:12776074-12776410	ENSMUSG00000024695	Zfp91	0.0336593	0.120657	0.34	DecIR
ENSMUSG00000034616,chr19:4264461-4265101	Ssh3,chr19:4264461-4265101	ENSMUSG00000034616	Ssh3	0.0259707	0.102101	0.222	DecIR
ENSMUSG00000024588,chr18:64458218-64458653	Fech,chr18:64458218-64458653	ENSMUSG00000024588	Fech	0.000281109	0.004175	0.667	DecIR
ENSMUSG00000024454,chr18:37941459-37941706	Hdac3,chr18:37941459-37941706	ENSMUSG00000024454	Hdac3	9.4704e-10	7.12056e-08	0.764	DecIR
ENSMUSG00000024384,chr18:32086424-32087068	Iws1,chr18:32086424-32087068	ENSMUSG00000024384	Iws1	0.00791188	0.0531731	0.333	DecIR
ENSMUSG00000024911,chr19:5463851-5464127	Fibp,chr19:5463851-5464127	ENSMUSG00000024911	Fibp	0.000694872	0.00879927	0.163	DecIR
ENSMUSG00000071074,chr17:46251228-46251362	Yipf3,chr17:46251228-46251362	ENSMUSG00000071074	Yipf3	0.00174062	0.0185307	0.293	DecIR
ENSMUSG00000007029,chr17:35013748-35013826	Vars,chr17:35013748-35013826	ENSMUSG00000007029	Vars	1.93425e-08	1.22469e-06	0.62	DecIR
ENSMUSG00000024339,chr17:34212068-34212228	Tap2,chr17:34212068-34212228	ENSMUSG00000024339	Tap2	0.00663186	0.0469301	0.148	DecIR
ENSMUSG00000024338,chr17:34199381-34199569	Psmb8,chr17:34199381-34199569	ENSMUSG00000024338	Psmb8	0.00507824	0.0391611	0.264	DecIR
ENSMUSG00000024335,chr17:34114178-34114348	Brd2,chr17:34114178-34114348	ENSMUSG00000024335	Brd2	0.0104143	0.0604344	0.133	DecIR
ENSMUSG00000008668,chr17:33952313-33952401	Rps18,chr17:33952313-33952401	ENSMUSG00000008668	Rps18	0.00292561	0.027283	0.315	DecIR
ENSMUSG00000025733,chr17:25841668-25841755	Rhot2,chr17:25841668-25841755	ENSMUSG00000025733	Rhot2	0.0146014	0.0728857	0.259	DecIR
ENSMUSG00000061046,chr17:25783583-25783783	Haghl,chr17:25783583-25783783	ENSMUSG00000061046	Haghl	0.0288632	0.107997	0.278	DecIR
ENSMUSG00000024327,chr17:34030255-34030366	Slc39a7,chr17:34030255-34030366	ENSMUSG00000024327	Slc39a7	0.00208463	0.0207257	0.395	DecIR
ENSMUSG00000024319,chr17:33962186-33962421	Vps52,chr17:33962186-33962421	ENSMUSG00000024319	Vps52	0.00167539	0.0183227	0.174	DecIR
ENSMUSG00000022978,chr16:90726360-90727024	Mis18a,chr16:90726360-90727024	ENSMUSG00000022978	Mis18a	3.33067e-16	1.3356e-13	0.952	DecIR
ENSMUSG00000039637,chr16:4634431-4634587	Coro7,chr16:4634431-4634587	ENSMUSG00000039637	Coro7	0.0169214	0.0779079	0.275	DecIR
ENSMUSG00000039637,chr16:4634682-4634760	Coro7,chr16:4634682-4634760	ENSMUSG00000039637	Coro7	2.30443e-07	9.55941e-06	0.478	DecIR
ENSMUSG00000022999,chr15:98908597-98908674	Lmbr1l,chr15:98908597-98908674	ENSMUSG00000022999	Lmbr1l	0.0294328	0.107997	0.256	DecIR
ENSMUSG00000022437,chr15:84200424-84200628	Samm50,chr15:84200424-84200628	ENSMUSG00000022437	Samm50	0.00530659	0.0402678	0.203	DecIR
ENSMUSG00000055024,chr15:81639892-81639993	Ep300,chr15:81639892-81639993	ENSMUSG00000055024	Ep300	0.00392373	0.033716	0.356	DecIR
ENSMUSG00000022407,chr15:80963730-80963878	Adsl,chr15:80963730-80963878	ENSMUSG00000022407	Adsl	0.00538912	0.0402678	0.222	DecIR
ENSMUSG00000009585,chr15:79905601-79906339	Apobec3,chr15:79905601-79906339	ENSMUSG00000009585	Apobec3	0.00817458	0.0537186	0.105	DecIR
ENSMUSG00000115987,chr15:76622563-76622653	Vps28,chr15:76622563-76622653	ENSMUSG00000115987	Vps28	0.00616316	0.044935	0.302	DecIR
ENSMUSG00000034022,chr15:76596572-76596649	Cpsf1,chr15:76596572-76596649	ENSMUSG00000034022	Cpsf1	0.0265671	0.102766	0.156	DecIR
ENSMUSG00000022556,chr15:76497830-76497950	Hsf1,chr15:76497830-76497950	ENSMUSG00000022556	Hsf1	0.0083134	0.0537186	0.222	DecIR
ENSMUSG00000022552,chr15:76347388-76347480	Sharpin,chr15:76347388-76347480	ENSMUSG00000022552	Sharpin	0.0128079	0.0681765	0.374	DecIR
ENSMUSG00000022587,chr15:74958389-74958491	Ly6e,chr15:74958389-74958491	ENSMUSG00000022587	Ly6e	5.82811e-07	2.06212e-05	0.545	DecIR
ENSMUSG00000072501,chr15:66629982-66630865	Phf20l1,chr15:66629982-66630865	ENSMUSG00000072501	Phf20l1	0.0124909	0.0681765	0.222	DecIR
ENSMUSG00000002625,chr17:32334697-32335561	Akap8l,chr17:32334697-32335561	ENSMUSG00000002625	Akap8l	0.00344037	0.0311186	0.208	DecIR
ENSMUSG00000021134,chr12:80947595-80947794	Srsf5,chr12:80947595-80947794	ENSMUSG00000021134	Srsf5	0.0309576	0.113197	0.331	DecIR
ENSMUSG00000024446,chr17:36257525-36257604	Rpp21,chr17:36257525-36257604	ENSMUSG00000024446	Rpp21	0.0137993	0.0709423	0.398	DecIR
ENSMUSG00000003039,chr8:72220083-72221926	Fam32a,chr8:72220083-72221926	ENSMUSG00000003039	Fam32a	4.74731e-13	6.34558e-11	0.778	DecIR
ENSMUSG00000000134,chrX:7771071-7772447	Tfe3,chrX:7771071-7772447	ENSMUSG00000000134	Tfe3	0.0192801	0.0852721	0.267	DecIR
ENSMUSG00000038895,chr9:22056093-22056412	Zfp653,chr9:22056093-22056412	ENSMUSG00000038895	Zfp653	8.54812e-05	0.00149035	0.395	DecIR
ENSMUSG00000020116,chr11:17209138-17209309	Pno1,chr11:17209138-17209309	ENSMUSG00000020116	Pno1	2.22045e-14	4.12127e-12	0.987	DecIR
ENSMUSG00000021639,chr13:100486126-100486472	Gtf2h2,chr13:100486126-100486472	ENSMUSG00000021639	Gtf2h2	0	0	0.952	DecIR
ENSMUSG00000066621,chr5:144214157-144214243	Tecpr1,chr5:144214157-144214243	ENSMUSG00000066621	Tecpr1	7.09932e-12	8.54048e-10	0.659	DecIR
ENSMUSG00000002010,chrX:73782104-73782673	Idh3g,chrX:73782104-73782673	ENSMUSG00000002010	Idh3g	0.00304796	0.0282053	0.288	DecIR
ENSMUSG00000040033,chr10:128285084-128285270	Stat2,chr10:128285084-128285270	ENSMUSG00000040033	Stat2	0.00843991	0.0537186	0.2	DecIR
ENSMUSG00000018076,chr5:118749829-118750844	Med13l,chr5:118749829-118750844	ENSMUSG00000018076	Med13l	1.14719e-06	3.53863e-05	0.44	DecIR
ENSMUSG00000040472,chr14:55719346-55719428	Rabggta,chr14:55719346-55719428	ENSMUSG00000040472	Rabggta	0.0498209	0.161114	0.267	DecIR
ENSMUSG00000037174,chr3:51265007-51266751	Elf2,chr3:51265007-51266751	ENSMUSG00000037174	Elf2	0.00425959	0.0357278	0.148	DecIR
ENSMUSG00000037742,chr9:78479535-78479622	Eef1a1,chr9:78479535-78479622	ENSMUSG00000037742	Eef1a1	0.0430309	0.14582	0.269	DecIR
ENSMUSG00000045679,chr12:16997704-16997772	Pqlc3,chr12:16997704-16997772	ENSMUSG00000045679	Pqlc3	0.00545843	0.0405339	0.283	DecIR
ENSMUSG00000016344,chr2:181187737-181187807	Ppdpf,chr2:181187737-181187807	ENSMUSG00000016344	Ppdpf	0.0120545	0.0665211	0.19	DecIR
ENSMUSG00000029148,chr5:31244289-31244456	Nrbp1,chr5:31244289-31244456	ENSMUSG00000029148	Nrbp1	1.08822e-05	0.000231	0.363	DecIR
ENSMUSG00000029148,chr5:31250141-31250228	Nrbp1,chr5:31250141-31250228	ENSMUSG00000029148	Nrbp1	0.0484036	0.158232	0.154	DecIR
ENSMUSG00000029017,chr5:21743459-21745976	Pmpcb,chr5:21743459-21745976	ENSMUSG00000029017	Pmpcb	2.52026e-10	2.16562e-08	0.723	DecIR
ENSMUSG00000041264,chr5:149213523-149214021	Uspl1,chr5:149213523-149214021	ENSMUSG00000041264	Uspl1	0.0185843	0.0828034	0.178	DecIR
ENSMUSG00000060601,chr7:44552237-44552505	Nr1h2,chr7:44552237-44552505	ENSMUSG00000060601	Nr1h2	0.00389096	0.033675	0.214	DecIR
ENSMUSG00000028670,chr4:135969530-135969599	Lypla2,chr4:135969530-135969599	ENSMUSG00000028670	Lypla2	0.00797644	0.0533092	0.283	DecIR
ENSMUSG00000001229,chr17:56205622-56205695	Dpp9,chr17:56205622-56205695	ENSMUSG00000001229	Dpp9	0.0208264	0.0879092	0.286	DecIR
ENSMUSG00000036023,chr14:50815428-50816195	Parp2,chr14:50815428-50816195	ENSMUSG00000036023	Parp2	1.33211e-06	3.9086e-05	0.511	DecIR
ENSMUSG00000032596,chr9:107975966-107976053	Uba7,chr9:107975966-107976053	ENSMUSG00000032596	Uba7	0.00650268	0.0462883	0.222	DecIR
ENSMUSG00000032596,chr9:107979459-107979542	Uba7,chr9:107979459-107979542	ENSMUSG00000032596	Uba7	0.0169077	0.0779079	0.059	DecIR
ENSMUSG00000032596,chr9:107981297-107981388	Uba7,chr9:107981297-107981388	ENSMUSG00000032596	Uba7	0.00423585	0.0357278	0.378	DecIR
ENSMUSG00000029177,chr5:30673060-30673291	Cenpa,chr5:30673060-30673291	ENSMUSG00000029177	Cenpa	0.0453836	0.151237	0.222	DecIR
ENSMUSG00000024914,chr19:5424276-5424359	Drap1,chr19:5424276-5424359	ENSMUSG00000024914	Drap1	0.014379	0.0723763	0.296	DecIR
ENSMUSG00000020640,chr12:4712037-4712465	Itsn2,chr12:4712037-4712465	ENSMUSG00000020640	Itsn2	0.015063	0.0736616	0.337	DecIR
ENSMUSG00000030057,chr6:87845321-87845463	Cnbp,chr6:87845321-87845463	ENSMUSG00000030057	Cnbp	0.0107551	0.0616111	0.382	DecIR
ENSMUSG00000030057,chr6:87845558-87845654	Cnbp,chr6:87845558-87845654	ENSMUSG00000030057	Cnbp	0.0455372	0.151329	0.315	DecIR
ENSMUSG00000019338,chr3:95008918-95009074	Zfp687,chr3:95008918-95009074	ENSMUSG00000019338	Zfp687	0.0126783	0.0681765	0.3	DecIR
ENSMUSG00000039615,chr17:25831219-25831307	Stub1,chr17:25831219-25831307	ENSMUSG00000039615	Stub1	5.50066e-07	2.00524e-05	0.414	DecIR
ENSMUSG00000028461,chr4:43495622-43495695	Ccdc107,chr4:43495622-43495695	ENSMUSG00000028461	Ccdc107	0.00844723	0.0537186	0.222	DecIR
ENSMUSG00000023971,chr17:46672592-46672704	Rrp36,chr17:46672592-46672704	ENSMUSG00000023971	Rrp36	0.00685405	0.048063	0.333	DecIR
ENSMUSG00000001017,chr3:90506262-90507543	Chtop,chr3:90506262-90507543	ENSMUSG00000001017	Chtop	0.00230713	0.0222038	0.089	DecIR
ENSMUSG00000060671,chr3:89946540-89946623	Atp8b2,chr3:89946540-89946623	ENSMUSG00000060671	Atp8b2	0.0252836	0.100053	0.297	DecIR
ENSMUSG00000028057,chr3:88717471-88717600	Rit1,chr3:88717471-88717600	ENSMUSG00000028057	Rit1	5.04149e-08	2.75678e-06	0.647	DecIR
ENSMUSG00000001416,chr3:88299404-88300798	Cct3,chr3:88299404-88300798	ENSMUSG00000001416	Cct3	0.035361	0.125856	0.291	DecIR
ENSMUSG00000001416,chr3:88300851-88300927	Cct3,chr3:88300851-88300927	ENSMUSG00000001416	Cct3	0.0019636	0.0200187	0.182	DecIR
ENSMUSG00000058254,chrX:10590220-10595277	Tspan7,chrX:10590220-10595277	ENSMUSG00000058254	Tspan7	3.16214e-06	7.45894e-05	0.432	DecIR
ENSMUSG00000030035,chr6:83120288-83120770	Wbp1,chr6:83120288-83120770	ENSMUSG00000030035	Wbp1	0.0434673	0.146885	0.144	DecIR
ENSMUSG00000015291,chrX:74307871-74308128	Gdi1,chrX:74307871-74308128	ENSMUSG00000015291	Gdi1	0.000368898	0.00527899	0.183	DecIR
ENSMUSG00000035798,chr10:110949684-110950559	Zdhhc17,chr10:110949684-110950559	ENSMUSG00000035798	Zdhhc17	0.0126245	0.0681765	0.071	DecIR
ENSMUSG00000032308,chr9:57593854-57593980	Ulk3,chr9:57593854-57593980	ENSMUSG00000032308	Ulk3	0.0166674	0.0779079	0.292	DecIR
ENSMUSG00000054203,chr1:174027327-174028196	Ifi205,chr1:174027327-174028196	ENSMUSG00000054203	Ifi205	0.0409126	0.140673	0.296	DecIR
ENSMUSG00000059796,chr11:69667775-69668020	Eif4a1,chr11:69667775-69668020	ENSMUSG00000059796	Eif4a1	0.00146929	0.0166751	0.179	DecIR
ENSMUSG00000040701,chr14:55104659-55104829	Ap1g2,chr14:55104659-55104829	ENSMUSG00000040701	Ap1g2	0.00700832	0.048063	0.212	DecIR
ENSMUSG00000003184,chr7:45000547-45000643	Irf3,chr7:45000547-45000643	ENSMUSG00000003184	Irf3	0.0481984	0.157991	0.075	DecIR
ENSMUSG00000038828,chr5:30874969-30875788	Tmem214,chr5:30874969-30875788	ENSMUSG00000038828	Tmem214	0.0169466	0.0779079	0.292	DecIR
ENSMUSG00000031389,chrX:73899873-73900097	Arhgap4,chrX:73899873-73900097	ENSMUSG00000031389	Arhgap4	0.000745526	0.00915171	0.216	DecIR
ENSMUSG00000036281,chr2:26372826-26372972	Snapc4,chr2:26372826-26372972	ENSMUSG00000036281	Snapc4	0.0149295	0.0736075	0.235	DecIR
ENSMUSG00000026958,chr2:25355954-25356027	Dpp7,chr2:25355954-25356027	ENSMUSG00000026958	Dpp7	0.000105051	0.00177995	0.419	DecIR
ENSMUSG00000026399,chr1:130448409-130449415	Cd55,chr1:130448409-130449415	ENSMUSG00000026399	Cd55	0.0403783	0.140391	0.282	DecIR
ENSMUSG00000009995,chrX:74283117-74283270	Taz,chrX:74283117-74283270	ENSMUSG00000009995	Taz	0.029115	0.107997	0.322	DecIR
ENSMUSG00000026116,chr1:36808477-36808825	Tmem131,chr1:36808477-36808825	ENSMUSG00000026116	Tmem131	0.0104492	0.0604344	0.254	DecIR
ENSMUSG00000035047,chr9:21281740-21281813	Kri1,chr9:21281740-21281813	ENSMUSG00000035047	Kri1	2.41626e-06	5.93216e-05	0.461	DecIR
ENSMUSG00000062729,chr1:171278196-171279121	Ppox,chr1:171278196-171279121	ENSMUSG00000062729	Ppox	0.0472989	0.155466	0.188	DecIR
ENSMUSG00000053332,chr1:161036853-161037122	Gas5,chr1:161036853-161037122	ENSMUSG00000053332	Gas5	0.0413031	0.141244	0.28	DecIR
ENSMUSG00000053332,chr1:161036853-161037286	Gas5,chr1:161036853-161037286	ENSMUSG00000053332	Gas5	0.000436079	0.00610004	0.169	DecIR
ENSMUSG00000026509,chr1:182491036-182492060	Capn2,chr1:182491036-182492060	ENSMUSG00000026509	Capn2	0.00120897	0.0143999	0.356	DecIR
ENSMUSG00000034807,chr8:71621897-71622701	Colgalt1,chr8:71621897-71622701	ENSMUSG00000034807	Colgalt1	0.00720197	0.048949	0.306	DecIR
ENSMUSG00000024404,chr18:12136839-12136926	Riok3,chr18:12136839-12136926	ENSMUSG00000024404	Riok3	0.0232265	0.094717	0.334	DecIR
ENSMUSG00000006005,chr1:150440199-150440437	Tpr,chr1:150440199-150440437	ENSMUSG00000006005	Tpr	1.32459e-06	3.9086e-05	0.367	DecIR
ENSMUSG00000024926,chr19:5603553-5603632	Kat5,chr19:5603553-5603632	ENSMUSG00000024926	Kat5	0.0203537	0.087392	0.267	DecIR
ENSMUSG00000029670,chr6:21969436-21969912	Ing3,chr6:21969436-21969912	ENSMUSG00000029670	Ing3	0.0127578	0.0681765	0.283	DecIR
ENSMUSG00000039318,chr1:185267075-185267171	Rab3gap2,chr1:185267075-185267171	ENSMUSG00000039318	Rab3gap2	0.0187332	0.0831589	0.25	DecIR
ENSMUSG00000012848,chr7:12925866-12926394	Rps5,chr7:12925866-12926394	ENSMUSG00000012848	Rps5	0	0	0.055	DecIR
ENSMUSG00000025915,chr1:9885754-9886045	Sgk3,chr1:9885754-9886045	ENSMUSG00000025915	Sgk3	0.00845534	0.0537186	0.31	DecIR
ENSMUSG00000040044,chr4:34597442-34598606	Orc3,chr4:34597442-34598606	ENSMUSG00000040044	Orc3	0.00889367	0.0551499	0.276	DecIR
ENSMUSG00000032316,chr9:57758724-57760822	Clk3,chr9:57758724-57760822	ENSMUSG00000032316	Clk3	8.38709e-06	0.000183929	0.328	DecIR
ENSMUSG00000024045,chr17:32316668-32317065	Akap8,chr17:32316668-32317065	ENSMUSG00000024045	Akap8	1.09451e-05	0.000231	0.353	DecIR
ENSMUSG00000046223,chr7:24472055-24472571	Plaur,chr7:24472055-24472571	ENSMUSG00000046223	Plaur	1.11996e-06	3.53863e-05	0.491	DecIR
ENSMUSG00000002007,chrX:73778175-73778252	Srpk3,chrX:73778175-73778252	ENSMUSG00000002007	Srpk3	0.00206838	0.0207257	0.196	DecIR
ENSMUSG00000015790,chr2:26915730-26915953	Surf1,chr2:26915730-26915953	ENSMUSG00000015790	Surf1	0.00805381	0.0533955	0.323	DecIR
ENSMUSG00000026457,chr1:134424075-134424749	Adipor1,chr1:134424075-134424749	ENSMUSG00000026457	Adipor1	0.0160488	0.0769193	0.126	DecIR
ENSMUSG00000004100,chr9:20889440-20889632	Ppan,chr9:20889440-20889632	ENSMUSG00000004100	Ppan	6.12728e-11	6.14259e-09	0.697	DecIR
ENSMUSG00000005625,chr3:95032985-95033480	Psmd4,chr3:95032985-95033480	ENSMUSG00000005625	Psmd4	0.0261762	0.102182	0.299	DecIR
ENSMUSG00000020134,chr11:21140694-21142554	Peli1,chr11:21140694-21142554	ENSMUSG00000020134	Peli1	0.0197779	0.0868352	0.264	DecIR
ENSMUSG00000073889,chr4:41765553-41766109	Il11ra1,chr4:41765553-41766109	ENSMUSG00000073889	Il11ra1	2.39808e-14	4.12127e-12	0.984	DecIR
ENSMUSG00000029068,chr4:155817988-155820327	Ccnl2,chr4:155817988-155820327	ENSMUSG00000029068	Ccnl2	0.0116478	0.0650183	0.172	DecIR
ENSMUSG00000056737,chr6:72555650-72555749	Capg,chr6:72555650-72555749	ENSMUSG00000056737	Capg	0.0222459	0.0919651	0.089	DecIR
ENSMUSG00000026972,chr2:24926195-24926270	Arrdc1,chr2:24926195-24926270	ENSMUSG00000026972	Arrdc1	0.000736077	0.00912887	0.18	DecIR
ENSMUSG00000027330,chr2:131192689-131193066	Cdc25b,chr2:131192689-131193066	ENSMUSG00000027330	Cdc25b	0.026547	0.102766	0.303	DecIR
ENSMUSG00000024835,chr19:4149545-4149861	Coro1b,chr19:4149545-4149861	ENSMUSG00000024835	Coro1b	0.0138774	0.0710405	0.302	DecIR
ENSMUSG00000043716,chr1:16103335-16103508	Rpl7,chr1:16103335-16103508	ENSMUSG00000043716	Rpl7	3.92646e-11	4.29412e-09	0.656	DecIR
ENSMUSG00000063884,chr6:71883593-71884538	Ptcd3,chr6:71883593-71884538	ENSMUSG00000063884	Ptcd3	0.0286056	0.107997	0.278	DecIR
ENSMUSG00000038241,chr2:155988433-155989497	Cep250,chr2:155988433-155989497	ENSMUSG00000038241	Cep250	0.0343441	0.122599	0.259	DecIR
ENSMUSG00000035086,chr11:101294148-101294968	Becn1,chr11:101294148-101294968	ENSMUSG00000035086	Becn1	0.0413973	0.141244	0.348	DecIR
ENSMUSG00000031918,chr9:13799336-13799874	Mtmr2,chr9:13799336-13799874	ENSMUSG00000031918	Mtmr2	0.00852888	0.0537186	0.355	DecIR
ENSMUSG00000028821,chr4:134935050-134935372	Syf2,chr4:134935050-134935372	ENSMUSG00000028821	Syf2	0.0154304	0.0751527	0.222	DecIR
ENSMUSG00000002833,chr17:56099076-56099175	Hdgfl2,chr17:56099076-56099175	ENSMUSG00000002833	Hdgfl2	0.0014677	0.0166751	0.545	DecIR
ENSMUSG00000040687,chr2:91158144-91158415	Madd,chr2:91158144-91158415	ENSMUSG00000040687	Madd	0.00061014	0.00789246	0.236	DecIR
ENSMUSG00000032604,chr9:108508987-108509147	Qars,chr9:108508987-108509147	ENSMUSG00000032604	Qars	0.0157799	0.0761516	0.275	DecIR
ENSMUSG00000032604,chr9:108515233-108515794	Qars,chr9:108515233-108515794	ENSMUSG00000032604	Qars	0.0462454	0.152926	0.229	DecIR
ENSMUSG00000022241,chr15:11391893-11391968	Tars,chr15:11391893-11391968	ENSMUSG00000022241	Tars	0.0161324	0.0770131	0.311	DecIR
ENSMUSG00000003068,chr10:80126166-80126231	Stk11,chr10:80126166-80126231	ENSMUSG00000003068	Stk11	7.02539e-06	0.000159463	0.393	DecIR
ENSMUSG00000032185,chr9:21587586-21587849	Carm1,chr9:21587586-21587849	ENSMUSG00000032185	Carm1	0.00700729	0.048063	0.3	DecIR
ENSMUSG00000040356,chr17:34846996-34847141	Skiv2l,chr17:34846996-34847141	ENSMUSG00000040356	Skiv2l	0.0217289	0.090316	0.196	DecIR
ENSMUSG00000027613,chr2:155826211-155826325	Eif6,chr2:155826211-155826325	ENSMUSG00000027613	Eif6	0.0245458	0.0982246	0.227	DecIR
ENSMUSG00000014353,chr2:128845535-128846727	Tmem87b,chr2:128845535-128846727	ENSMUSG00000014353	Tmem87b	0.0327988	0.118209	0.195	DecIR
ENSMUSG00000036931,chr7:30425856-30425968	Nfkbid,chr7:30425856-30425968	ENSMUSG00000036931	Nfkbid	0.0281471	0.107495	0.256	DecIR
ENSMUSG00000038346,chr6:125024553-125024744	Zfp384,chr6:125024553-125024744	ENSMUSG00000038346	Zfp384	0.000599827	0.00789246	0.356	DecIR
ENSMUSG00000019802,chr10:42797734-42798745	Sec63,chr10:42797734-42798745	ENSMUSG00000019802	Sec63	0.0286109	0.107997	0.238	DecIR
ENSMUSG00000040048,chr17:24722221-24722379	Ndufb10,chr17:24722221-24722379	ENSMUSG00000040048	Ndufb10	0.00145794	0.0166751	0.622	DecIR
ENSMUSG00000055681,chr8:70312781-70312857	Cope,chr8:70312781-70312857	ENSMUSG00000055681	Cope	0.0194686	0.0857902	0.25	DecIR
ENSMUSG00000027404,chr2:130172729-130173034	Snrpb,chr2:130172729-130173034	ENSMUSG00000027404	Snrpb	0.0291543	0.107997	0.332	DecIR
ENSMUSG00000027514,chr2:173210734-173212097	Zbp1,chr2:173210734-173212097	ENSMUSG00000027514	Zbp1	0.0217433	0.090316	0.196	DecIR
ENSMUSG00000000787,chrX:13288365-13288571	Ddx3x,chrX:13288365-13288571	ENSMUSG00000000787	Ddx3x	0.0322071	0.116702	0.313	DecIR
ENSMUSG00000011877,chr11:77503429-77503919	Git1,chr11:77503429-77503919	ENSMUSG00000011877	Git1	0.0102208	0.0602726	0.317	DecIR
ENSMUSG00000011877,chr11:77505591-77505678	Git1,chr11:77505591-77505678	ENSMUSG00000011877	Git1	1.66339e-06	4.65363e-05	0.557	DecIR
ENSMUSG00000053754,chr14:52205507-52205594	Chd8,chr14:52205507-52205594	ENSMUSG00000053754	Chd8	0.0119568	0.0662856	0.187	DecIR
ENSMUSG00000058407,chr1:37987780-37990201	Txndc9,chr1:37987780-37990201	ENSMUSG00000058407	Txndc9	0.0205722	0.0876583	0.407	DecIR
ENSMUSG00000059208,chr17:33666530-33666645	Hnrnpm,chr17:33666530-33666645	ENSMUSG00000059208	Hnrnpm	0.0100183	0.0596635	0.177	DecIR
ENSMUSG00000024858,chr19:4291331-4291588	Grk2,chr19:4291331-4291588	ENSMUSG00000024858	Grk2	0.00181659	0.0191698	0.207	DecIR
ENSMUSG00000041263,chr3:89089352-89089483	Rusc1,chr3:89089352-89089483	ENSMUSG00000041263	Rusc1	0.00888901	0.0551499	0.235	DecIR
ENSMUSG00000032590,chr9:108092414-108092552	Apeh,chr9:108092414-108092552	ENSMUSG00000032590	Apeh	0.00910037	0.0561423	0.261	DecIR
ENSMUSG00000032590,chr9:108092883-108092979	Apeh,chr9:108092883-108092979	ENSMUSG00000032590	Apeh	2.45677e-05	0.000469127	0.357	DecIR
ENSMUSG00000027263,chr2:121189470-121189822	Tubgcp4,chr2:121189470-121189822	ENSMUSG00000027263	Tubgcp4	0.0249334	0.0989928	0.133	DecIR
ENSMUSG00000001248,chr7:31134518-31135595	Gramd1a,chr7:31134518-31135595	ENSMUSG00000001248	Gramd1a	0.018413	0.0823449	0.071	DecIR
ENSMUSG00000106864,chr5:31168101-31168249	Gtf3c2,chr5:31168101-31168249	ENSMUSG00000106864	Gtf3c2	0.000131087	0.00213104	0.733	DecIR
ENSMUSG00000027349,chr2:117257780-117259219	Fam98b,chr2:117257780-117259219	ENSMUSG00000027349	Fam98b	0.0125406	0.0681765	0.3	DecIR
ENSMUSG00000013593,chr1:171238065-171238285	Ndufs2,chr1:171238065-171238285	ENSMUSG00000013593	Ndufs2	3.70161e-05	0.000695786	0.384	DecIR
ENSMUSG00000004266,chr6:124720909-124721078	Ptpn6,chr6:124720909-124721078	ENSMUSG00000004266	Ptpn6	1.91943e-07	8.24671e-06	0.383	DecIR
ENSMUSG00000030330,chr6:125047941-125048174	Ing4,chr6:125047941-125048174	ENSMUSG00000030330	Ing4	0.0121486	0.0667341	0.267	DecIR
ENSMUSG00000008373,chr7:3634863-3636199	Prpf31,chr7:3634863-3636199	ENSMUSG00000008373	Prpf31	0.0199282	0.0868611	0.308	DecIR
ENSMUSG00000047098,chr14:55596859-55598636	Rnf31,chr14:55596859-55598636	ENSMUSG00000047098	Rnf31	0.0162916	0.0771497	0.395	DecIR
ENSMUSG00000029578,chr5:142658289-142659063	Wipi2,chr5:142658289-142659063	ENSMUSG00000029578	Wipi2	8.40907e-06	0.000183929	0.398	DecIR
ENSMUSG00000006024,chr7:16113406-16113474	Napa,chr7:16113406-16113474	ENSMUSG00000006024	Napa	0.00341624	0.0311186	0.205	DecIR
ENSMUSG00000001918,chr7:16795953-16796022	Slc1a5,chr7:16795953-16796022	ENSMUSG00000001918	Slc1a5	0.00066064	0.00845479	0.18	DecIR
ENSMUSG00000052488,chr8:72470016-72470088	Cherp,chr8:72470016-72470088	ENSMUSG00000052488	Cherp	0.0149981	0.0736437	0.198	DecIR
ENSMUSG00000051768,chr7:24566968-24567037	Xrcc1,chr7:24566968-24567037	ENSMUSG00000051768	Xrcc1	0.0262463	0.102182	0.303	DecIR
ENSMUSG00000030603,chr7:28042508-28042648	Psmc4,chr7:28042508-28042648	ENSMUSG00000030603	Psmc4	0.00774129	0.052319	0.247	DecIR
ENSMUSG00000016933,chr2:160761195-160761303	Plcg1,chr2:160761195-160761303	ENSMUSG00000016933	Plcg1	2.23903e-08	1.34678e-06	0.627	DecIR
ENSMUSG00000070003,chr8:70598618-70598700	Ssbp4,chr8:70598618-70598700	ENSMUSG00000070003	Ssbp4	5.09125e-05	0.000900703	0.33	DecIR
ENSMUSG00000039536,chr2:166951347-166952324	Stau1,chr2:166951347-166952324	ENSMUSG00000039536	Stau1	7.13795e-07	2.45342e-05	0.436	DecIR
ENSMUSG00000005150,chr8:85076133-85076215	Wdr83,chr8:85076133-85076215	ENSMUSG00000005150	Wdr83	0.0230878	0.0944716	0.208	DecIR
ENSMUSG00000008690,chr15:89370809-89370890	Ncaph2,chr15:89370809-89370890	ENSMUSG00000008690	Ncaph2	0.0379122	0.132583	0.351	DecIR
ENSMUSG00000064127,chrX:12706446-12706530	Med14,chrX:12706446-12706530	ENSMUSG00000064127	Med14	0.00227053	0.0220278	0.167	DecIR
ENSMUSG00000033685,chr7:100494376-100496724	Ucp2,chr7:100494376-100496724	ENSMUSG00000033685	Ucp2	0.00537292	0.0402678	0.378	DecIR
ENSMUSG00000067713,chr15:98815238-98815312	Prkag1,chr15:98815238-98815312	ENSMUSG00000067713	Prkag1	0.0230268	0.0944716	0.222	DecIR
ENSMUSG00000030890,chr7:105741484-105741578	Ilk,chr7:105741484-105741578	ENSMUSG00000030890	Ilk	7.46422e-07	2.49429e-05	0.389	DecIR
ENSMUSG00000030751,chr7:114274128-114274414	Psma1,chr7:114274128-114274414	ENSMUSG00000030751	Psma1	0.00276582	0.0260361	0.458	DecIR
ENSMUSG00000057193,chr9:21342867-21342962	Slc44a2,chr9:21342867-21342962	ENSMUSG00000057193	Slc44a2	0.00403733	0.0344461	0.24	DecIR
ENSMUSG00000042502,chr7:127195159-127195359	Cd2bp2,chr7:127195159-127195359	ENSMUSG00000042502	Cd2bp2	0.00503335	0.0391611	0.308	DecIR
ENSMUSG00000066979,chr7:131561607-131563332	Bub3,chr7:131561607-131563332	ENSMUSG00000066979	Bub3	0.00961785	0.0578514	0.536	DecIR
ENSMUSG00000025473,chr7:139984844-139985335	Adam8,chr7:139984844-139985335	ENSMUSG00000025473	Adam8	0.00384653	0.033675	0.205	DecIR
ENSMUSG00000025473,chr7:139986469-139986731	Adam8,chr7:139986469-139986731	ENSMUSG00000025473	Adam8	0.0262278	0.102182	0.303	DecIR
ENSMUSG00000019082,chr7:141432140-141432661	Slc25a22,chr7:141432140-141432661	ENSMUSG00000019082	Slc25a22	0.000444882	0.00615165	0.556	DecIR
ENSMUSG00000015656,chr9:40802624-40802737	Hspa8,chr9:40802624-40802737	ENSMUSG00000015656	Hspa8	0.00195611	0.0200187	0.38	DecIR
ENSMUSG00000024542,chr18:67878076-67878537	Cep192,chr18:67878076-67878537	ENSMUSG00000024542	Cep192	2.0549e-06	5.37401e-05	0.519	DecIR
ENSMUSG00000022536,chr16:5048787-5049804	Glyr1,chr16:5048787-5049804	ENSMUSG00000022536	Glyr1	0.00626972	0.0454299	0.231	DecIR
ENSMUSG00000035623,chr7:97669874-97670801	Rsf1,chr7:97669874-97670801	ENSMUSG00000035623	Rsf1	0.0315658	0.114724	0.147	DecIR
ENSMUSG00000020362,chr11:49685156-49685261	Cnot6,chr11:49685156-49685261	ENSMUSG00000020362	Cnot6	0.0378354	0.132583	0.204	DecIR
ENSMUSG00000002395,chr8:71367694-71367768	Use1,chr8:71367694-71367768	ENSMUSG00000002395	Use1	0.00532608	0.0402678	0.307	DecIR
ENSMUSG00000002395,chr8:71368878-71369130	Use1,chr8:71368878-71369130	ENSMUSG00000002395	Use1	0.010751	0.0616111	0.377	DecIR
ENSMUSG00000029221,chr5:67342230-67344528	Slc30a9,chr5:67342230-67344528	ENSMUSG00000029221	Slc30a9	0.0270259	0.104206	0.404	DecIR
ENSMUSG00000034024,chr10:117061411-117061503	Cct2,chr10:117061411-117061503	ENSMUSG00000034024	Cct2	0.00199149	0.0201324	0.433	DecIR
ENSMUSG00000021957,chr14:30558839-30559750	Tkt,chr14:30558839-30559750	ENSMUSG00000021957	Tkt	0.0179344	0.0814154	0.25	DecIR
ENSMUSG00000021957,chr14:30568358-30568973	Tkt,chr14:30568358-30568973	ENSMUSG00000021957	Tkt	0.0435933	0.146899	0.316	DecIR
ENSMUSG00000040345,chr10:127326652-127326871	Arhgap9,chr10:127326652-127326871	ENSMUSG00000040345	Arhgap9	2.7748e-06	6.67617e-05	0.404	DecIR
ENSMUSG00000004626,chr8:3633927-3634018	Stxbp2,chr8:3633927-3634018	ENSMUSG00000004626	Stxbp2	6.78647e-09	4.53562e-07	0.599	DecIR
ENSMUSG00000010936,chr8:110710493-110711591	Vac14,chr8:110710493-110711591	ENSMUSG00000010936	Vac14	0.0135336	0.0706388	0.314	DecIR
ENSMUSG00000022488,chr15:103475735-103475976	Nckap1l,chr15:103475735-103475976	ENSMUSG00000022488	Nckap1l	0.016557	0.077805	0.19	DecIR
ENSMUSG00000031862,chr8:69798514-69798582	Atp13a1,chr8:69798514-69798582	ENSMUSG00000031862	Atp13a1	0.046272	0.152926	0.095	DecIR
ENSMUSG00000031796,chr8:95422895-95424615	Cfap20,chr8:95422895-95424615	ENSMUSG00000031796	Cfap20	0.00350166	0.0314365	0.306	DecIR
ENSMUSG00000024906,chr19:5485626-5486027	Mus81,chr19:5485626-5486027	ENSMUSG00000024906	Mus81	0.0201487	0.0871904	0.175	DecIR
ENSMUSG00000037300,chr8:124673528-124673655	Ttc13,chr8:124673528-124673655	ENSMUSG00000037300	Ttc13	0.0201341	0.0871904	0.267	DecIR
ENSMUSG00000020329,chr10:79736444-79736521	Polrmt,chr10:79736444-79736521	ENSMUSG00000020329	Polrmt	3.11307e-13	4.68127e-11	0.803	DecIR
ENSMUSG00000010057,chr9:107545032-107545243	Nprl2,chr9:107545032-107545243	ENSMUSG00000010057	Nprl2	0.0211439	0.0889375	0.159	DecIR
ENSMUSG00000022216,chr14:55579834-55579929	Psme1,chr14:55579834-55579929	ENSMUSG00000022216	Psme1	0.00521982	0.0399965	0.273	DecIR
ENSMUSG00000004667,chr10:80036599-80036762	Polr2e,chr10:80036599-80036762	ENSMUSG00000004667	Polr2e	3.19644e-07	1.28177e-05	0.51	DecIR
ENSMUSG00000004667,chr10:80036843-80036913	Polr2e,chr10:80036843-80036913	ENSMUSG00000004667	Polr2e	0.0127971	0.0681765	0.352	DecIR
ENSMUSG00000032178,chr9:21398137-21399123	Ilf3,chr9:21398137-21399123	ENSMUSG00000032178	Ilf3	0.00850639	0.0537186	0.299	DecIR
ENSMUSG00000032115,chr9:44388366-44388480	Hyou1,chr9:44388366-44388480	ENSMUSG00000032115	Hyou1	0.023438	0.0949359	0.116	DecIR
ENSMUSG00000025722,chr7:80900712-80901183	Wdr73,chr7:80900712-80901183	ENSMUSG00000025722	Wdr73	0.00807812	0.0533955	0.19	DecIR
ENSMUSG00000032376,chr9:66520387-66520607	Usp3,chr9:66520387-66520607	ENSMUSG00000032376	Usp3	0.00452066	0.0369956	0.271	DecIR
ENSMUSG00000030037,chr6:83109427-83109520	Mrpl53,chr6:83109427-83109520	ENSMUSG00000030037	Mrpl53	2.01802e-06	5.37401e-05	0.498	DecIR
ENSMUSG00000032553,chr9:103197621-103198787	Srprb,chr9:103197621-103198787	ENSMUSG00000032553	Srprb	0.0336998	0.120657	0.197	DecIR
ENSMUSG00000023249,chr9:106473520-106473679	Parp3,chr9:106473520-106473679	ENSMUSG00000023249	Parp3	0.00493089	0.0390254	0.259	DecIR
ENSMUSG00000006676,chr9:108498037-108498121	Usp19,chr9:108498037-108498121	ENSMUSG00000006676	Usp19	0.0135641	0.0706388	0.314	DecIR
ENSMUSG00000024190,chr17:26507205-26507572	Dusp1,chr17:26507205-26507572	ENSMUSG00000024190	Dusp1	1.46381e-07	6.77323e-06	0.583	DecIR
ENSMUSG00000020359,chr11:51592094-51592167	Phykpl,chr11:51592094-51592167	ENSMUSG00000020359	Phykpl	0.0116741	0.0650183	0.188	DecIR
ENSMUSG00000001588,chr11:69884492-69884584	Acap1,chr11:69884492-69884584	ENSMUSG00000001588	Acap1	0.0198592	0.0868611	0.16	DecIR
ENSMUSG00000040746,chr11:70649766-70649910	Rnf167,chr11:70649766-70649910	ENSMUSG00000040746	Rnf167	0.0275483	0.105543	0.327	DecIR
ENSMUSG00000057649,chr13:73942055-73942689	Brd9,chr13:73942055-73942689	ENSMUSG00000057649	Brd9	0.0058909	0.043477	0.133	DecIR
ENSMUSG00000018287,chr11:70664477-70664576	Spag7,chr11:70664477-70664576	ENSMUSG00000018287	Spag7	0.0233335	0.0948316	0.401	DecIR
ENSMUSG00000020817,chr11:70934595-70935125	Rabep1,chr11:70934595-70935125	ENSMUSG00000020817	Rabep1	0.0116386	0.0650183	0.222	DecIR
ENSMUSG00000020745,chr11:74684509-74685894	Pafah1b1,chr11:74684509-74685894	ENSMUSG00000020745	Pafah1b1	0.000541535	0.00736782	0.524	DecIR
ENSMUSG00000026942,chr2:25528307-25530285	Traf2,chr2:25528307-25530285	ENSMUSG00000026942	Traf2	0.0217719	0.090316	0.441	DecIR
ENSMUSG00000022214,chr14:55565167-55565482	Dcaf11,chr14:55565167-55565482	ENSMUSG00000022214	Dcaf11	0.00446306	0.0367744	0.484	DecIR
ENSMUSG00000020708,chr11:106262503-106262579	Psmc5,chr11:106262503-106262579	ENSMUSG00000020708	Psmc5	3.77593e-07	1.4653e-05	0.563	DecIR
ENSMUSG00000001962,chrX:74314964-74315425	Fam50a,chrX:74314964-74315425	ENSMUSG00000001962	Fam50a	0.0409273	0.140673	0.296	DecIR

## Sheet: S8
Supplementary Table 8. List of genes whose expression were recovered by artificial gravity in RIKEN data
Tissue	recovery Genes (ensembl)	recovery Genes (symbol)	type
TH	ENSMUSG00000000305	Cdh4	reverse V-shape
TH	ENSMUSG00000001497	Pax9	reverse V-shape
TH	ENSMUSG00000001768	Rin2	reverse V-shape
TH	ENSMUSG00000002265	Peg3	reverse V-shape
TH	ENSMUSG00000002602	Axl	reverse V-shape
TH	ENSMUSG00000002900	Lamb1	reverse V-shape
TH	ENSMUSG00000002985	Apoe	reverse V-shape
TH	ENSMUSG00000003379	Cd79a	reverse V-shape
TH	ENSMUSG00000003420	Fcgrt	reverse V-shape
TH	ENSMUSG00000004328	Hif3a	reverse V-shape
TH	ENSMUSG00000004508	Gab2	reverse V-shape
TH	ENSMUSG00000005413	Hmox1	reverse V-shape
TH	ENSMUSG00000005883	Spo11	reverse V-shape
TH	ENSMUSG00000008206	Cers4	reverse V-shape
TH	ENSMUSG00000008845	Cd163	reverse V-shape
TH	ENSMUSG00000010136	Pifo	reverse V-shape
TH	ENSMUSG00000013076	Amotl1	reverse V-shape
TH	ENSMUSG00000014361	Mertk	reverse V-shape
TH	ENSMUSG00000014725	Adam28	reverse V-shape
TH	ENSMUSG00000015243	Abca1	reverse V-shape
TH	ENSMUSG00000015305	Sash1	reverse V-shape
TH	ENSMUSG00000015947	Fcgr1	reverse V-shape
TH	ENSMUSG00000017607	Tns4	reverse V-shape
TH	ENSMUSG00000018417	Myo1b	reverse V-shape
TH	ENSMUSG00000018800	Abca5	reverse V-shape
TH	ENSMUSG00000019852	Arfgef3	reverse V-shape
TH	ENSMUSG00000019872	Smpdl3a	reverse V-shape
TH	ENSMUSG00000019929	Dcn	reverse V-shape
TH	ENSMUSG00000019970	Sgk1	reverse V-shape
TH	ENSMUSG00000019990	Pde7b	reverse V-shape
TH	ENSMUSG00000020160	Meis1	reverse V-shape
TH	ENSMUSG00000020227	Irak3	reverse V-shape
TH	ENSMUSG00000020263	Appl2	reverse V-shape
TH	ENSMUSG00000020422	Tns3	reverse V-shape
TH	ENSMUSG00000020641	Rsad2	reverse V-shape
TH	ENSMUSG00000020841	Cpd	reverse V-shape
TH	ENSMUSG00000021190	Lgmn	reverse V-shape
TH	ENSMUSG00000021318	Gli3	reverse V-shape
TH	ENSMUSG00000021732	Fgf10	reverse V-shape
TH	ENSMUSG00000021903	Galnt15	reverse V-shape
TH	ENSMUSG00000022010	Tsc22d1	reverse V-shape
TH	ENSMUSG00000022146	Osmr	reverse V-shape
TH	ENSMUSG00000022150	Dab2	reverse V-shape
TH	ENSMUSG00000022197	Pdzd2	reverse V-shape
TH	ENSMUSG00000022228	Zscan26	reverse V-shape
TH	ENSMUSG00000022510	Trp63	reverse V-shape
TH	ENSMUSG00000022548	Apod	reverse V-shape
TH	ENSMUSG00000022584	Ly6c2	reverse V-shape
TH	ENSMUSG00000022629	Kif21a	reverse V-shape
TH	ENSMUSG00000022636	Alcam	reverse V-shape
TH	ENSMUSG00000022667	Cd200r1	reverse V-shape
TH	ENSMUSG00000022696	Sidt1	reverse V-shape
TH	ENSMUSG00000022788	Fgd4	reverse V-shape
TH	ENSMUSG00000022893	Adamts1	reverse V-shape
TH	ENSMUSG00000023913	Pla2g7	reverse V-shape
TH	ENSMUSG00000024395	Lims2	reverse V-shape
TH	ENSMUSG00000024421	Lama3	reverse V-shape
TH	ENSMUSG00000024597	Slc12a2	reverse V-shape
TH	ENSMUSG00000024621	Csf1r	reverse V-shape
TH	ENSMUSG00000024678	Ms4a4d	reverse V-shape
TH	ENSMUSG00000024697	Gna14	reverse V-shape
TH	ENSMUSG00000024924	Vldlr	reverse V-shape
TH	ENSMUSG00000025044	Msr1	reverse V-shape
TH	ENSMUSG00000025105	Bnc1	reverse V-shape
TH	ENSMUSG00000025150	Cbr2	reverse V-shape
TH	ENSMUSG00000025555	Farp1	reverse V-shape
TH	ENSMUSG00000025597	Klhl4	reverse V-shape
TH	ENSMUSG00000025702	Marchf8	reverse V-shape
TH	ENSMUSG00000025743	Sdc3	reverse V-shape
TH	ENSMUSG00000025812	Pard3	reverse V-shape
TH	ENSMUSG00000025876	Unc5a	reverse V-shape
TH	ENSMUSG00000025931	Paqr8	reverse V-shape
TH	ENSMUSG00000025932	Eya1	reverse V-shape
TH	ENSMUSG00000026177	Slc11a1	reverse V-shape
TH	ENSMUSG00000026185	Igfbp5	reverse V-shape
TH	ENSMUSG00000026224	4933407L21Rik	reverse V-shape
TH	ENSMUSG00000026604	Ptpn14	reverse V-shape
TH	ENSMUSG00000026639	Lamb3	reverse V-shape
TH	ENSMUSG00000026712	Mrc1	reverse V-shape
TH	ENSMUSG00000027210	Meis2	reverse V-shape
TH	ENSMUSG00000027322	Siglec1	reverse V-shape
TH	ENSMUSG00000027790	Sis	reverse V-shape
TH	ENSMUSG00000028024	Enpep	reverse V-shape
TH	ENSMUSG00000028456	Unc13b	reverse V-shape
TH	ENSMUSG00000029135	Fosl2	reverse V-shape
TH	ENSMUSG00000029190	D5Ertd579e	reverse V-shape
TH	ENSMUSG00000029470	P2rx4	reverse V-shape
TH	ENSMUSG00000029553	Tfec	reverse V-shape
TH	ENSMUSG00000029804	Herc3	reverse V-shape
TH	ENSMUSG00000029998	Pcyox1	reverse V-shape
TH	ENSMUSG00000030149	Klrk1	reverse V-shape
TH	ENSMUSG00000030156	Cd69	reverse V-shape
TH	ENSMUSG00000030560	Ctsc	reverse V-shape
TH	ENSMUSG00000031024	Denn2b	reverse V-shape
TH	ENSMUSG00000031216	Stard8	reverse V-shape
TH	ENSMUSG00000031239	Itm2a	reverse V-shape
TH	ENSMUSG00000031379	Pir	reverse V-shape
TH	ENSMUSG00000031613	Hpgd	reverse V-shape
TH	ENSMUSG00000031639	Tlr3	reverse V-shape
TH	ENSMUSG00000031749	St3gal2	reverse V-shape
TH	ENSMUSG00000031778	Cx3cl1	reverse V-shape
TH	ENSMUSG00000031824	6430548M08Rik	reverse V-shape
TH	ENSMUSG00000031870	Pgr	reverse V-shape
TH	ENSMUSG00000032013	Trim29	reverse V-shape
TH	ENSMUSG00000032238	Rora	reverse V-shape
TH	ENSMUSG00000032366	Tpm1	reverse V-shape
TH	ENSMUSG00000032548	Slco2a1	reverse V-shape
TH	ENSMUSG00000032554	Trf	reverse V-shape
TH	ENSMUSG00000032735	Ablim3	reverse V-shape
TH	ENSMUSG00000032826	Ank2	reverse V-shape
TH	ENSMUSG00000032878	Ccdc85a	reverse V-shape
TH	ENSMUSG00000033400	Agl	reverse V-shape
TH	ENSMUSG00000033542	Arhgef5	reverse V-shape
TH	ENSMUSG00000033577	Myo6	reverse V-shape
TH	ENSMUSG00000033863	Klf9	reverse V-shape
TH	ENSMUSG00000033981	Gria2	reverse V-shape
TH	ENSMUSG00000034009	Rxfp1	reverse V-shape
TH	ENSMUSG00000034101	Ctnnd1	reverse V-shape
TH	ENSMUSG00000034235	Usp54	reverse V-shape
TH	ENSMUSG00000034573	Ptpn13	reverse V-shape
TH	ENSMUSG00000034707	Gns	reverse V-shape
TH	ENSMUSG00000034708	Grn	reverse V-shape
TH	ENSMUSG00000034771	Tle2	reverse V-shape
TH	ENSMUSG00000034910	Pygo1	reverse V-shape
TH	ENSMUSG00000035713	Usp35	reverse V-shape
TH	ENSMUSG00000035954	Dock4	reverse V-shape
TH	ENSMUSG00000036002	Fam214b	reverse V-shape
TH	ENSMUSG00000036036	Zfp57	reverse V-shape
TH	ENSMUSG00000036528	Ppfibp2	reverse V-shape
TH	ENSMUSG00000036887	C1qa	reverse V-shape
TH	ENSMUSG00000036896	C1qc	reverse V-shape
TH	ENSMUSG00000036905	C1qb	reverse V-shape
TH	ENSMUSG00000036960	Clca2	reverse V-shape
TH	ENSMUSG00000037003	Tns2	reverse V-shape
TH	ENSMUSG00000037224	Zfyve28	reverse V-shape
TH	ENSMUSG00000037624	Kcnk2	reverse V-shape
TH	ENSMUSG00000037709	Fam13a	reverse V-shape
TH	ENSMUSG00000037999	Arap2	reverse V-shape
TH	ENSMUSG00000038045	Sult6b1	reverse V-shape
TH	ENSMUSG00000038143	Stox2	reverse V-shape
TH	ENSMUSG00000038175	Mylip	reverse V-shape
TH	ENSMUSG00000038296	Galnt18	reverse V-shape
TH	ENSMUSG00000038393	Txnip	reverse V-shape
TH	ENSMUSG00000038668	Lpar1	reverse V-shape
TH	ENSMUSG00000039115	Itga9	reverse V-shape
TH	ENSMUSG00000039813	Tbc1d2	reverse V-shape
TH	ENSMUSG00000040093	Bmf	reverse V-shape
TH	ENSMUSG00000040564	Apoc1	reverse V-shape
TH	ENSMUSG00000040663	Clcf1	reverse V-shape
TH	ENSMUSG00000041046	Ramp3	reverse V-shape
TH	ENSMUSG00000041308	Sntb2	reverse V-shape
TH	ENSMUSG00000041577	Prelp	reverse V-shape
TH	ENSMUSG00000041688	Amot	reverse V-shape
TH	ENSMUSG00000042190	Cmklr1	reverse V-shape
TH	ENSMUSG00000042228	Lyn	reverse V-shape
TH	ENSMUSG00000042500	Ago4	reverse V-shape
TH	ENSMUSG00000042599	Kdm7a	reverse V-shape
TH	ENSMUSG00000042662	Dusp15	reverse V-shape
TH	ENSMUSG00000042726	Trafd1	reverse V-shape
TH	ENSMUSG00000042851	Zc3h6	reverse V-shape
TH	ENSMUSG00000043263	Ifi209	reverse V-shape
TH	ENSMUSG00000043518	Rai2	reverse V-shape
TH	ENSMUSG00000043629	1700019D03Rik	reverse V-shape
TH	ENSMUSG00000043740	B430306N03Rik	reverse V-shape
TH	ENSMUSG00000043940	Wdfy3	reverse V-shape
TH	ENSMUSG00000044349	Snhg11	reverse V-shape
TH	ENSMUSG00000044694	2010007H06Rik	reverse V-shape
TH	ENSMUSG00000044748	Defb1	reverse V-shape
TH	ENSMUSG00000045392	Olfr1033	reverse V-shape
TH	ENSMUSG00000045636	Mtus1	reverse V-shape
TH	ENSMUSG00000046532	Ar	reverse V-shape
TH	ENSMUSG00000046618	Olfml2a	reverse V-shape
TH	ENSMUSG00000046805	Mpeg1	reverse V-shape
TH	ENSMUSG00000047228	A2ml1	reverse V-shape
TH	ENSMUSG00000048120	Entpd1	reverse V-shape
TH	ENSMUSG00000048232	Fbxo10	reverse V-shape
TH	ENSMUSG00000048424	Ranbp3l	reverse V-shape
TH	ENSMUSG00000048489	Depp1	reverse V-shape
TH	ENSMUSG00000051043	Gprc5c	reverse V-shape
TH	ENSMUSG00000051354	Samd3	reverse V-shape
TH	ENSMUSG00000051439	Cd14	reverse V-shape
TH	ENSMUSG00000051497	Kcnj16	reverse V-shape
TH	ENSMUSG00000052387	Trpm3	reverse V-shape
TH	ENSMUSG00000052534	Pbx1	reverse V-shape
TH	ENSMUSG00000052544	St6galnac3	reverse V-shape
TH	ENSMUSG00000052613	Pcdh15	reverse V-shape
TH	ENSMUSG00000052631	Sh2d6	reverse V-shape
TH	ENSMUSG00000052736	Klrc2	reverse V-shape
TH	ENSMUSG00000052957	Gas1	reverse V-shape
TH	ENSMUSG00000052974	Cyp2f2	reverse V-shape
TH	ENSMUSG00000054263	Lifr	reverse V-shape
TH	ENSMUSG00000055322	Tns1	reverse V-shape
TH	ENSMUSG00000055435	Maf	reverse V-shape
TH	ENSMUSG00000055809	Dnaaf3	reverse V-shape
TH	ENSMUSG00000056592	Zfp658	reverse V-shape
TH	ENSMUSG00000057722	Lepr	reverse V-shape
TH	ENSMUSG00000057766	Ankrd29	reverse V-shape
TH	ENSMUSG00000058248	Kcnh1	reverse V-shape
TH	ENSMUSG00000059495	Arhgef12	reverse V-shape
TH	ENSMUSG00000059498	Fcgr3	reverse V-shape
TH	ENSMUSG00000059854	Hydin	reverse V-shape
TH	ENSMUSG00000060336	Zfp937	reverse V-shape
TH	ENSMUSG00000062609	Kcnj15	reverse V-shape
TH	ENSMUSG00000062866	Phactr2	reverse V-shape
TH	ENSMUSG00000063558	Aox1	reverse V-shape
TH	ENSMUSG00000063760	Rnf217	reverse V-shape
TH	ENSMUSG00000064225	Paqr9	reverse V-shape
TH	ENSMUSG00000064373	Selenop	reverse V-shape
TH	ENSMUSG00000066363	Serpina3f	reverse V-shape
TH	ENSMUSG00000067336	Bmpr2	reverse V-shape
TH	ENSMUSG00000067750	Khdc1a	reverse V-shape
TH	ENSMUSG00000068748	Ptprz1	reverse V-shape
TH	ENSMUSG00000068876	Cgn	reverse V-shape
TH	ENSMUSG00000070047	Fat1	reverse V-shape
TH	ENSMUSG00000070056	Mfhas1	reverse V-shape
TH	ENSMUSG00000070369	Itgad	reverse V-shape
TH	ENSMUSG00000070509	Rgma	reverse V-shape
TH	ENSMUSG00000071203	Naip5	reverse V-shape
TH	ENSMUSG00000071855	Ccdc112	reverse V-shape
TH	ENSMUSG00000072294	Klf12	reverse V-shape
TH	ENSMUSG00000072949	Acot1	reverse V-shape
TH	ENSMUSG00000073489	Ifi204	reverse V-shape
TH	ENSMUSG00000073643	Wdfy1	reverse V-shape
TH	ENSMUSG00000074622	Mafb	reverse V-shape
TH	ENSMUSG00000075316	Scn9a	reverse V-shape
TH	ENSMUSG00000075590	Nrbp2	reverse V-shape
TH	ENSMUSG00000076532	Igkv4-91	reverse V-shape
TH	ENSMUSG00000078117	Gm16485	reverse V-shape
TH	ENSMUSG00000078496	Zfp982	reverse V-shape
TH	ENSMUSG00000079554	Aox2	reverse V-shape
TH	ENSMUSG00000080316	Spaca6	reverse V-shape
TH	ENSMUSG00000081978	Gm14895	reverse V-shape
TH	ENSMUSG00000082100	Glns-ps1	reverse V-shape
TH	ENSMUSG00000083282	Ctsf	reverse V-shape
TH	ENSMUSG00000085227	6330418K02Rik	reverse V-shape
TH	ENSMUSG00000086291	Gm15513	reverse V-shape
TH	ENSMUSG00000086503	Xist	reverse V-shape
TH	ENSMUSG00000086534	Gm16758	reverse V-shape
TH	ENSMUSG00000087150	BC064078	reverse V-shape
TH	ENSMUSG00000087301	Gm13629	reverse V-shape
TH	ENSMUSG00000087331	1810021B22Rik	reverse V-shape
TH	ENSMUSG00000089630	Gm6903	reverse V-shape
TH	ENSMUSG00000091491	Vmn2r97	reverse V-shape
TH	ENSMUSG00000091712	Sec14l5	reverse V-shape
TH	ENSMUSG00000096553	Gm10097	reverse V-shape
TH	ENSMUSG00000096929	A330023F24Rik	reverse V-shape
TH	ENSMUSG00000097572	Gm26797	reverse V-shape
TH	ENSMUSG00000097585	E230029C05Rik	reverse V-shape
TH	ENSMUSG00000099757	BE692007	reverse V-shape
TH	ENSMUSG00000101930	Gm5441	reverse V-shape
TH	ENSMUSG00000102091	Olfr1034	reverse V-shape
TH	ENSMUSG00000102752	Gm7694	reverse V-shape
TH	ENSMUSG00000102758	Naaladl2	reverse V-shape
TH	ENSMUSG00000104020	Gm37215	reverse V-shape
TH	ENSMUSG00000104339	C130089K02Rik	reverse V-shape
TH	ENSMUSG00000105289	Gm43483	reverse V-shape
TH	ENSMUSG00000105485	Gm42447	reverse V-shape
TH	ENSMUSG00000105726	Gm42443	reverse V-shape
TH	ENSMUSG00000105731	Gm43063	reverse V-shape
TH	ENSMUSG00000105867	Gm42517	reverse V-shape
TH	ENSMUSG00000105985	Gm42993	reverse V-shape
TH	ENSMUSG00000106641	Gm43534	reverse V-shape
TH	ENSMUSG00000107481	4833403J16Rik	reverse V-shape
TH	ENSMUSG00000108897	Gm44861	reverse V-shape
TH	ENSMUSG00000109245	Gm44860	reverse V-shape
TH	ENSMUSG00000109608	Gm45597	reverse V-shape
TH	ENSMUSG00000110397	Gm45540	reverse V-shape
TH	ENSMUSG00000112309	Gm48353	reverse V-shape
TH	ENSMUSG00000112555	Gm47027	reverse V-shape
TH	ENSMUSG00000113673	Gm47486	reverse V-shape
TH	ENSMUSG00000115388	ENSMUSG00000115388	reverse V-shape
TH	ENSMUSG00000116180	Gm49492	reverse V-shape
TH	ENSMUSG00000117442	1810073O08Rik	reverse V-shape
TH	ENSMUSG00000000028	Cdc45	V-shape
TH	ENSMUSG00000000276	Dgke	V-shape
TH	ENSMUSG00000000751	Rpa1	V-shape
TH	ENSMUSG00000001228	Uhrf1	V-shape
TH	ENSMUSG00000001403	Ube2c	V-shape
TH	ENSMUSG00000001440	Kpnb1	V-shape
TH	ENSMUSG00000001517	Foxm1	V-shape
TH	ENSMUSG00000001525	Tubb5	V-shape
TH	ENSMUSG00000001761	Smo	V-shape
TH	ENSMUSG00000002055	Spag5	V-shape
TH	ENSMUSG00000002068	Ccne1	V-shape
TH	ENSMUSG00000002221	Paxip1	V-shape
TH	ENSMUSG00000002274	Metrn	V-shape
TH	ENSMUSG00000002297	Dbf4	V-shape
TH	ENSMUSG00000002477	Snrpd1	V-shape
TH	ENSMUSG00000002835	Chaf1a	V-shape
TH	ENSMUSG00000002870	Mcm2	V-shape
TH	ENSMUSG00000003038	Hmgn2	V-shape
TH	ENSMUSG00000003778	Brd8	V-shape
TH	ENSMUSG00000003779	Kif20a	V-shape
TH	ENSMUSG00000003810	Mast2	V-shape
TH	ENSMUSG00000003824	Syce2	V-shape
TH	ENSMUSG00000004099	Dnmt1	V-shape
TH	ENSMUSG00000004127	Trmt10a	V-shape
TH	ENSMUSG00000004446	Bid	V-shape
TH	ENSMUSG00000004642	Slbp	V-shape
TH	ENSMUSG00000004880	Lbr	V-shape
TH	ENSMUSG00000004897	Hdgf	V-shape
TH	ENSMUSG00000004929	Thop1	V-shape
TH	ENSMUSG00000005233	Spc25	V-shape
TH	ENSMUSG00000005374	Tbl2	V-shape
TH	ENSMUSG00000005410	Mcm5	V-shape
TH	ENSMUSG00000005470	Asf1b	V-shape
TH	ENSMUSG00000005667	Mthfd2	V-shape
TH	ENSMUSG00000005698	Ctcf	V-shape
TH	ENSMUSG00000005732	Ranbp1	V-shape
TH	ENSMUSG00000005899	Smpd4	V-shape
TH	ENSMUSG00000006398	Cdc20	V-shape
TH	ENSMUSG00000006585	Cdt1	V-shape
TH	ENSMUSG00000006678	Pola1	V-shape
TH	ENSMUSG00000006715	Gmnn	V-shape
TH	ENSMUSG00000006728	Cdk4	V-shape
TH	ENSMUSG00000007029	Vars	V-shape
TH	ENSMUSG00000007035	Msh5	V-shape
TH	ENSMUSG00000007041	Clic1	V-shape
TH	ENSMUSG00000007050	Lsm2	V-shape
TH	ENSMUSG00000007080	Pole	V-shape
TH	ENSMUSG00000007646	Rad51c	V-shape
TH	ENSMUSG00000009216	Fam163b	V-shape
TH	ENSMUSG00000009575	Cbx5	V-shape
TH	ENSMUSG00000012443	Kif11	V-shape
TH	ENSMUSG00000012609	Ttll5	V-shape
TH	ENSMUSG00000014444	Piezo1	V-shape
TH	ENSMUSG00000014633	Cmc2	V-shape
TH	ENSMUSG00000014786	Slc9a5	V-shape
TH	ENSMUSG00000015217	Hmgb3	V-shape
TH	ENSMUSG00000015749	Anp32e	V-shape
TH	ENSMUSG00000015880	Ncapg	V-shape
TH	ENSMUSG00000016477	E2f3	V-shape
TH	ENSMUSG00000017146	Brca1	V-shape
TH	ENSMUSG00000017499	Cdc6	V-shape
TH	ENSMUSG00000017550	Atad5	V-shape
TH	ENSMUSG00000017716	Birc5	V-shape
TH	ENSMUSG00000017861	Mybl2	V-shape
TH	ENSMUSG00000018102	H2bc4	V-shape
TH	ENSMUSG00000018362	Kpna2	V-shape
TH	ENSMUSG00000018548	Trim37	V-shape
TH	ENSMUSG00000018554	Ybx2	V-shape
TH	ENSMUSG00000018858	Mrpl58	V-shape
TH	ENSMUSG00000018983	E2f2	V-shape
TH	ENSMUSG00000018986	Slfn3	V-shape
TH	ENSMUSG00000019179	Mdh2	V-shape
TH	ENSMUSG00000019214	Chtf18	V-shape
TH	ENSMUSG00000019370	Calm3	V-shape
TH	ENSMUSG00000019773	Fbxo5	V-shape
TH	ENSMUSG00000019942	Cdk1	V-shape
TH	ENSMUSG00000019961	Tmpo	V-shape
TH	ENSMUSG00000020089	Ppa1	V-shape
TH	ENSMUSG00000020185	E2f7	V-shape
TH	ENSMUSG00000020212	Mdm1	V-shape
TH	ENSMUSG00000020235	Fzr1	V-shape
TH	ENSMUSG00000020290	Xpo1	V-shape
TH	ENSMUSG00000020330	Hmmr	V-shape
TH	ENSMUSG00000020358	Hnrnpab	V-shape
TH	ENSMUSG00000020439	Smtn	V-shape
TH	ENSMUSG00000020492	Ska2	V-shape
TH	ENSMUSG00000020493	Prr11	V-shape
TH	ENSMUSG00000020532	Acaca	V-shape
TH	ENSMUSG00000020649	Rrm2	V-shape
TH	ENSMUSG00000020737	Jpt1	V-shape
TH	ENSMUSG00000020739	Nup85	V-shape
TH	ENSMUSG00000020766	Galk1	V-shape
TH	ENSMUSG00000020808	Pimreg	V-shape
TH	ENSMUSG00000020849	Ywhae	V-shape
TH	ENSMUSG00000020897	Aurkb	V-shape
TH	ENSMUSG00000020898	Ctc1	V-shape
TH	ENSMUSG00000020902	Ntn1	V-shape
TH	ENSMUSG00000020914	Top2a	V-shape
TH	ENSMUSG00000020929	Eftud2	V-shape
TH	ENSMUSG00000021176	Efcab11	V-shape
TH	ENSMUSG00000021177	Tdp1	V-shape
TH	ENSMUSG00000021377	Dek	V-shape
TH	ENSMUSG00000021388	Aspn	V-shape
TH	ENSMUSG00000021391	Cenpp	V-shape
TH	ENSMUSG00000021485	Mxd3	V-shape
TH	ENSMUSG00000021486	Prelid1	V-shape
TH	ENSMUSG00000021569	Trip13	V-shape
TH	ENSMUSG00000021572	Cep72	V-shape
TH	ENSMUSG00000021697	Depdc1b	V-shape
TH	ENSMUSG00000021707	Dhfr	V-shape
TH	ENSMUSG00000021714	Cenpk	V-shape
TH	ENSMUSG00000021932	Rnaseh2b	V-shape
TH	ENSMUSG00000021957	Tkt	V-shape
TH	ENSMUSG00000021965	Ska3	V-shape
TH	ENSMUSG00000022021	Diaph3	V-shape
TH	ENSMUSG00000022033	Pbk	V-shape
TH	ENSMUSG00000022034	Esco2	V-shape
TH	ENSMUSG00000022070	Bora	V-shape
TH	ENSMUSG00000022177	Haus4	V-shape
TH	ENSMUSG00000022314	Rad21	V-shape
TH	ENSMUSG00000022322	Shcbp1	V-shape
TH	ENSMUSG00000022360	Atad2	V-shape
TH	ENSMUSG00000022364	Tbc1d31	V-shape
TH	ENSMUSG00000022385	Gtse1	V-shape
TH	ENSMUSG00000022391	Rangap1	V-shape
TH	ENSMUSG00000022422	Dscc1	V-shape
TH	ENSMUSG00000022463	Srebf2	V-shape
TH	ENSMUSG00000022596	Slurp1	V-shape
TH	ENSMUSG00000022602	Arc	V-shape
TH	ENSMUSG00000022614	Lmf2	V-shape
TH	ENSMUSG00000022673	Mcm4	V-shape
TH	ENSMUSG00000022678	Nde1	V-shape
TH	ENSMUSG00000022814	Umps	V-shape
TH	ENSMUSG00000022881	Rfc4	V-shape
TH	ENSMUSG00000022978	Mis18a	V-shape
TH	ENSMUSG00000023004	Tuba1b	V-shape
TH	ENSMUSG00000023015	Racgap1	V-shape
TH	ENSMUSG00000023072	Cep89	V-shape
TH	ENSMUSG00000023243	Kcnk5	V-shape
TH	ENSMUSG00000023345	Poc1a	V-shape
TH	ENSMUSG00000023456	Tpi1	V-shape
TH	ENSMUSG00000023505	Cdca3	V-shape
TH	ENSMUSG00000023908	Pkmyt1	V-shape
TH	ENSMUSG00000023940	Sgo1	V-shape
TH	ENSMUSG00000023953	Polh	V-shape
TH	ENSMUSG00000024056	Ndc80	V-shape
TH	ENSMUSG00000024258	Polr2d	V-shape
TH	ENSMUSG00000024301	Kifc5b	V-shape
TH	ENSMUSG00000024369	Nelfe	V-shape
TH	ENSMUSG00000024590	Lmnb1	V-shape
TH	ENSMUSG00000024660	Incenp	V-shape
TH	ENSMUSG00000024665	Fads2	V-shape
TH	ENSMUSG00000024742	Fen1	V-shape
TH	ENSMUSG00000024764	Naa40	V-shape
TH	ENSMUSG00000024791	Cdca5	V-shape
TH	ENSMUSG00000024795	Kif20b	V-shape
TH	ENSMUSG00000024833	Pola2	V-shape
TH	ENSMUSG00000024844	Banf1	V-shape
TH	ENSMUSG00000024989	Cep55	V-shape
TH	ENSMUSG00000025001	Hells	V-shape
TH	ENSMUSG00000025014	Dntt	V-shape
TH	ENSMUSG00000025134	Alyref	V-shape
TH	ENSMUSG00000025154	Arhgap19	V-shape
TH	ENSMUSG00000025358	Cdk2	V-shape
TH	ENSMUSG00000025393	Atp5b	V-shape
TH	ENSMUSG00000025395	Prim1	V-shape
TH	ENSMUSG00000025403	Shmt2	V-shape
TH	ENSMUSG00000025507	Pidd1	V-shape
TH	ENSMUSG00000025747	Tyms	V-shape
TH	ENSMUSG00000025758	Plk4	V-shape
TH	ENSMUSG00000025817	Nudt5	V-shape
TH	ENSMUSG00000025912	Mybl1	V-shape
TH	ENSMUSG00000026020	Nop58	V-shape
TH	ENSMUSG00000026039	Sgo2a	V-shape
TH	ENSMUSG00000026134	Prim2	V-shape
TH	ENSMUSG00000026174	Cnot9	V-shape
TH	ENSMUSG00000026196	Bard1	V-shape
TH	ENSMUSG00000026238	Ptma	V-shape
TH	ENSMUSG00000026239	Pde6d	V-shape
TH	ENSMUSG00000026274	Pask	V-shape
TH	ENSMUSG00000026355	Mcm6	V-shape
TH	ENSMUSG00000026429	Ube2t	V-shape
TH	ENSMUSG00000026434	Nucks1	V-shape
TH	ENSMUSG00000026558	Uck2	V-shape
TH	ENSMUSG00000026605	Cenpf	V-shape
TH	ENSMUSG00000026622	Nek2	V-shape
TH	ENSMUSG00000026662	Sephs1	V-shape
TH	ENSMUSG00000026669	Mcm10	V-shape
TH	ENSMUSG00000026683	Nuf2	V-shape
TH	ENSMUSG00000026708	Cenpl	V-shape
TH	ENSMUSG00000026779	Mastl	V-shape
TH	ENSMUSG00000026873	Phf19	V-shape
TH	ENSMUSG00000026895	Ndufa8	V-shape
TH	ENSMUSG00000026955	Sapcd2	V-shape
TH	ENSMUSG00000027067	Ssrp1	V-shape
TH	ENSMUSG00000027115	Kif18a	V-shape
TH	ENSMUSG00000027160	Ccdc34	V-shape
TH	ENSMUSG00000027203	Dut	V-shape
TH	ENSMUSG00000027220	Syt13	V-shape
TH	ENSMUSG00000027242	Wdr76	V-shape
TH	ENSMUSG00000027306	Nusap1	V-shape
TH	ENSMUSG00000027323	Rad51	V-shape
TH	ENSMUSG00000027326	Knl1	V-shape
TH	ENSMUSG00000027330	Cdc25b	V-shape
TH	ENSMUSG00000027331	Knstrn	V-shape
TH	ENSMUSG00000027342	Pcna	V-shape
TH	ENSMUSG00000027379	Bub1	V-shape
TH	ENSMUSG00000027454	Gins1	V-shape
TH	ENSMUSG00000027469	Tpx2	V-shape
TH	ENSMUSG00000027490	E2f1	V-shape
TH	ENSMUSG00000027496	Aurka	V-shape
TH	ENSMUSG00000027635	Dsn1	V-shape
TH	ENSMUSG00000027641	Rbl1	V-shape
TH	ENSMUSG00000027654	Fam83d	V-shape
TH	ENSMUSG00000027699	Ect2	V-shape
TH	ENSMUSG00000027715	Ccna2	V-shape
TH	ENSMUSG00000027858	Tspan2	V-shape
TH	ENSMUSG00000027883	Gpsm2	V-shape
TH	ENSMUSG00000027896	Slc16a4	V-shape
TH	ENSMUSG00000028018	Gstcd	V-shape
TH	ENSMUSG00000028044	Cks1b	V-shape
TH	ENSMUSG00000028066	Pmf1	V-shape
TH	ENSMUSG00000028068	Iqgap3	V-shape
TH	ENSMUSG00000028175	Depdc1a	V-shape
TH	ENSMUSG00000028212	Ccne2	V-shape
TH	ENSMUSG00000028312	Smc2	V-shape
TH	ENSMUSG00000028332	Hemgn	V-shape
TH	ENSMUSG00000028333	Anp32b	V-shape
TH	ENSMUSG00000028438	Kif24	V-shape
TH	ENSMUSG00000028551	Cdkn2c	V-shape
TH	ENSMUSG00000028560	Usp1	V-shape
TH	ENSMUSG00000028613	Lrp8	V-shape
TH	ENSMUSG00000028614	Ndc1	V-shape
TH	ENSMUSG00000028639	Ybx1	V-shape
TH	ENSMUSG00000028664	Ephb2	V-shape
TH	ENSMUSG00000028678	Kif2c	V-shape
TH	ENSMUSG00000028702	Rad54l	V-shape
TH	ENSMUSG00000028718	Stil	V-shape
TH	ENSMUSG00000028832	Stmn1	V-shape
TH	ENSMUSG00000028873	Cdca8	V-shape
TH	ENSMUSG00000028896	Rcc1	V-shape
TH	ENSMUSG00000028933	Xrcc2	V-shape
TH	ENSMUSG00000028937	Acot7	V-shape
TH	ENSMUSG00000029177	Cenpa	V-shape
TH	ENSMUSG00000029191	Rfc1	V-shape
TH	ENSMUSG00000029253	Cenpc1	V-shape
TH	ENSMUSG00000029283	Cdc7	V-shape
TH	ENSMUSG00000029414	Kntc1	V-shape
TH	ENSMUSG00000029430	Ran	V-shape
TH	ENSMUSG00000029438	Bcl7a	V-shape
TH	ENSMUSG00000029516	Cit	V-shape
TH	ENSMUSG00000029591	Ung	V-shape
TH	ENSMUSG00000029687	Ezh2	V-shape
TH	ENSMUSG00000029705	Cux1	V-shape
TH	ENSMUSG00000029730	Mcm7	V-shape
TH	ENSMUSG00000029910	Mad2l1	V-shape
TH	ENSMUSG00000030177	Ccdc77	V-shape
TH	ENSMUSG00000030254	Rad18	V-shape
TH	ENSMUSG00000030319	Cand2	V-shape
TH	ENSMUSG00000030322	Mbd4	V-shape
TH	ENSMUSG00000030346	Rad51ap1	V-shape
TH	ENSMUSG00000030512	Snrpa1	V-shape
TH	ENSMUSG00000030528	Blm	V-shape
TH	ENSMUSG00000030641	Ddias	V-shape
TH	ENSMUSG00000030662	Ipo5	V-shape
TH	ENSMUSG00000030677	Kif22	V-shape
TH	ENSMUSG00000030726	Pold3	V-shape
TH	ENSMUSG00000030867	Plk1	V-shape
TH	ENSMUSG00000030978	Rrm1	V-shape
TH	ENSMUSG00000031004	Mki67	V-shape
TH	ENSMUSG00000031016	Wee1	V-shape
TH	ENSMUSG00000031256	Cstf2	V-shape
TH	ENSMUSG00000031262	Cenpi	V-shape
TH	ENSMUSG00000031386	Hcfc1	V-shape
TH	ENSMUSG00000031527	Eri1	V-shape
TH	ENSMUSG00000031669	Gins3	V-shape
TH	ENSMUSG00000031697	Orc6	V-shape
TH	ENSMUSG00000031756	Cenpn	V-shape
TH	ENSMUSG00000031807	Pgls	V-shape
TH	ENSMUSG00000031821	Gins2	V-shape
TH	ENSMUSG00000031826	Usp10	V-shape
TH	ENSMUSG00000032113	Chek1	V-shape
TH	ENSMUSG00000032193	Ldlr	V-shape
TH	ENSMUSG00000032218	Ccnb2	V-shape
TH	ENSMUSG00000032221	Mns1	V-shape
TH	ENSMUSG00000032231	Anxa2	V-shape
TH	ENSMUSG00000032244	Fem1b	V-shape
TH	ENSMUSG00000032254	Kif23	V-shape
TH	ENSMUSG00000032264	Zw10	V-shape
TH	ENSMUSG00000032397	Tipin	V-shape
TH	ENSMUSG00000032399	Rpl4	V-shape
TH	ENSMUSG00000032400	Zwilch	V-shape
TH	ENSMUSG00000032436	Cmtm7	V-shape
TH	ENSMUSG00000032481	Smarcc1	V-shape
TH	ENSMUSG00000032555	Topbp1	V-shape
TH	ENSMUSG00000032586	Traip	V-shape
TH	ENSMUSG00000032782	Cntrob	V-shape
TH	ENSMUSG00000032783	Troap	V-shape
TH	ENSMUSG00000032815	Fanca	V-shape
TH	ENSMUSG00000032902	Slc16a1	V-shape
TH	ENSMUSG00000033031	Cip2a	V-shape
TH	ENSMUSG00000033222	Ttf2	V-shape
TH	ENSMUSG00000033307	Mif	V-shape
TH	ENSMUSG00000033596	Rfwd3	V-shape
TH	ENSMUSG00000033762	Recql4	V-shape
TH	ENSMUSG00000033847	Pla2g4c	V-shape
TH	ENSMUSG00000033904	Ccp110	V-shape
TH	ENSMUSG00000033952	Aspm	V-shape
TH	ENSMUSG00000033970	Rfc3	V-shape
TH	ENSMUSG00000034023	Fancd2	V-shape
TH	ENSMUSG00000034120	Srsf2	V-shape
TH	ENSMUSG00000034156	Tspoap1	V-shape
TH	ENSMUSG00000034206	Polq	V-shape
TH	ENSMUSG00000034311	Kif4	V-shape
TH	ENSMUSG00000034317	Trim59	V-shape
TH	ENSMUSG00000034329	Brip1	V-shape
TH	ENSMUSG00000034413	Neurl1b	V-shape
TH	ENSMUSG00000034518	Hmgxb4	V-shape
TH	ENSMUSG00000034634	Ly6d	V-shape
TH	ENSMUSG00000034739	Mfrp	V-shape
TH	ENSMUSG00000034773	Hrob	V-shape
TH	ENSMUSG00000034883	Lrr1	V-shape
TH	ENSMUSG00000034906	Ncaph	V-shape
TH	ENSMUSG00000034926	Dhcr24	V-shape
TH	ENSMUSG00000035024	Ncapd3	V-shape
TH	ENSMUSG00000035198	Tubg1	V-shape
TH	ENSMUSG00000035266	Helq	V-shape
TH	ENSMUSG00000035293	G2e3	V-shape
TH	ENSMUSG00000035365	Parpbp	V-shape
TH	ENSMUSG00000035439	Haus8	V-shape
TH	ENSMUSG00000035455	Fignl1	V-shape
TH	ENSMUSG00000035683	Melk	V-shape
TH	ENSMUSG00000035704	Alg8	V-shape
TH	ENSMUSG00000035726	Supt16	V-shape
TH	ENSMUSG00000035863	Palm	V-shape
TH	ENSMUSG00000035885	Cox8a	V-shape
TH	ENSMUSG00000036086	Zranb3	V-shape
TH	ENSMUSG00000036109	Mbnl3	V-shape
TH	ENSMUSG00000036181	H1f2	V-shape
TH	ENSMUSG00000036211	H1f6	V-shape
TH	ENSMUSG00000036223	Ska1	V-shape
TH	ENSMUSG00000036412	Arsi	V-shape
TH	ENSMUSG00000036752	Tubb4b	V-shape
TH	ENSMUSG00000036768	Kif15	V-shape
TH	ENSMUSG00000036777	Anln	V-shape
TH	ENSMUSG00000036875	Dna2	V-shape
TH	ENSMUSG00000036882	Arhgap33	V-shape
TH	ENSMUSG00000037020	Wdr62	V-shape
TH	ENSMUSG00000037313	Tacc3	V-shape
TH	ENSMUSG00000037474	Dtl	V-shape
TH	ENSMUSG00000037544	Dlgap5	V-shape
TH	ENSMUSG00000037572	Wdhd1	V-shape
TH	ENSMUSG00000037628	Cdkn3	V-shape
TH	ENSMUSG00000037725	Ckap2	V-shape
TH	ENSMUSG00000037846	Rtkn2	V-shape
TH	ENSMUSG00000037894	H2az1	V-shape
TH	ENSMUSG00000037991	Rmi2	V-shape
TH	ENSMUSG00000038252	Ncapd2	V-shape
TH	ENSMUSG00000038379	Ttk	V-shape
TH	ENSMUSG00000038482	Tfdp1	V-shape
TH	ENSMUSG00000038491	Cdk19os	V-shape
TH	ENSMUSG00000038644	Pold1	V-shape
TH	ENSMUSG00000038759	Nup205	V-shape
TH	ENSMUSG00000038943	Prc1	V-shape
TH	ENSMUSG00000039055	Eme1	V-shape
TH	ENSMUSG00000039187	Fanci	V-shape
TH	ENSMUSG00000039231	Suv39h1	V-shape
TH	ENSMUSG00000039254	Pomt1	V-shape
TH	ENSMUSG00000039298	Cdk5rap2	V-shape
TH	ENSMUSG00000039396	Neil3	V-shape
TH	ENSMUSG00000039509	Nup133	V-shape
TH	ENSMUSG00000039748	Exo1	V-shape
TH	ENSMUSG00000039814	Xkr5	V-shape
TH	ENSMUSG00000039994	Timeless	V-shape
TH	ENSMUSG00000040084	Bub1b	V-shape
TH	ENSMUSG00000040204	Pclaf	V-shape
TH	ENSMUSG00000040212	Emp3	V-shape
TH	ENSMUSG00000040282	Cdin1	V-shape
TH	ENSMUSG00000040385	Ppp1ca	V-shape
TH	ENSMUSG00000040549	Ckap5	V-shape
TH	ENSMUSG00000040658	Dnph1	V-shape
TH	ENSMUSG00000040867	Begain	V-shape
TH	ENSMUSG00000041064	Pif1	V-shape
TH	ENSMUSG00000041126	H2az2	V-shape
TH	ENSMUSG00000041147	Brca2	V-shape
TH	ENSMUSG00000041219	Arhgap11a	V-shape
TH	ENSMUSG00000041406	BC055324	V-shape
TH	ENSMUSG00000041431	Ccnb1	V-shape
TH	ENSMUSG00000041498	Kif14	V-shape
TH	ENSMUSG00000041697	Cox6a1	V-shape
TH	ENSMUSG00000041859	Mcm3	V-shape
TH	ENSMUSG00000041879	Ipo9	V-shape
TH	ENSMUSG00000042029	Ncapg2	V-shape
TH	ENSMUSG00000042155	Klhl23	V-shape
TH	ENSMUSG00000042489	Clspn	V-shape
TH	ENSMUSG00000042606	Hirip3	V-shape
TH	ENSMUSG00000043091	Tuba1c	V-shape
TH	ENSMUSG00000043460	Elfn2	V-shape
TH	ENSMUSG00000043631	Ecm2	V-shape
TH	ENSMUSG00000044201	Cdc25c	V-shape
TH	ENSMUSG00000044934	Zfp367	V-shape
TH	ENSMUSG00000044966	Fbxo48	V-shape
TH	ENSMUSG00000045273	Cenph	V-shape
TH	ENSMUSG00000045328	Cenpe	V-shape
TH	ENSMUSG00000045751	Mms22l	V-shape
TH	ENSMUSG00000045799	Gm9800	V-shape
TH	ENSMUSG00000046057	Gm15428	V-shape
TH	ENSMUSG00000046179	E2f8	V-shape
TH	ENSMUSG00000046295	Ankle1	V-shape
TH	ENSMUSG00000046341	Gm11223	V-shape
TH	ENSMUSG00000046591	Ticrr	V-shape
TH	ENSMUSG00000046711	Hmga1	V-shape
TH	ENSMUSG00000047003	Zfp41	V-shape
TH	ENSMUSG00000047246	H2bc6	V-shape
TH	ENSMUSG00000047534	Mis18bp1	V-shape
TH	ENSMUSG00000047676	Rpsa-ps10	V-shape
TH	ENSMUSG00000047832	Cdca4	V-shape
TH	ENSMUSG00000048109	Rbm15	V-shape
TH	ENSMUSG00000048327	Ckap2l	V-shape
TH	ENSMUSG00000048368	Omd	V-shape
TH	ENSMUSG00000048574	Ccnb1-ps	V-shape
TH	ENSMUSG00000048922	Cdca2	V-shape
TH	ENSMUSG00000049327	Kmt5a	V-shape
TH	ENSMUSG00000049539	H1f1	V-shape
TH	ENSMUSG00000049916	2610318N02Rik	V-shape
TH	ENSMUSG00000049932	H2ax	V-shape
TH	ENSMUSG00000050107	Haspin	V-shape
TH	ENSMUSG00000050410	Tcf19	V-shape
TH	ENSMUSG00000050890	Pdik1l	V-shape
TH	ENSMUSG00000051220	Ercc6l	V-shape
TH	ENSMUSG00000051235	Gen1	V-shape
TH	ENSMUSG00000051278	Zgrf1	V-shape
TH	ENSMUSG00000051378	Kif18b	V-shape
TH	ENSMUSG00000051517	Arhgef39	V-shape
TH	ENSMUSG00000051627	H1f4	V-shape
TH	ENSMUSG00000051695	Pcbp1	V-shape
TH	ENSMUSG00000052565	H1f3	V-shape
TH	ENSMUSG00000052833	Sae1	V-shape
TH	ENSMUSG00000052852	Reep1	V-shape
TH	ENSMUSG00000052949	Rnf157	V-shape
TH	ENSMUSG00000053198	Prx	V-shape
TH	ENSMUSG00000053965	Pde5a	V-shape
TH	ENSMUSG00000054115	Skp2	V-shape
TH	ENSMUSG00000054717	Hmgb2	V-shape
TH	ENSMUSG00000054999	Naaladl1	V-shape
TH	ENSMUSG00000055612	Cdca7	V-shape
TH	ENSMUSG00000056394	Lig1	V-shape
TH	ENSMUSG00000056531	Ccdc18	V-shape
TH	ENSMUSG00000056895	H2bu2	V-shape
TH	ENSMUSG00000057406	Nsd2	V-shape
TH	ENSMUSG00000058290	Espl1	V-shape
TH	ENSMUSG00000058385	H2bc8	V-shape
TH	ENSMUSG00000058492	Scp2-ps2	V-shape
TH	ENSMUSG00000058672	Tubb2a	V-shape
TH	ENSMUSG00000058773	H1f5	V-shape
TH	ENSMUSG00000058799	Nap1l1	V-shape
TH	ENSMUSG00000058809	Hspd1-ps3	V-shape
TH	ENSMUSG00000059027	9630013D21Rik	V-shape
TH	ENSMUSG00000059323	Tonsl	V-shape
TH	ENSMUSG00000059363	Fxn	V-shape
TH	ENSMUSG00000059409	Ppp2r5d	V-shape
TH	ENSMUSG00000059791	Nrm	V-shape
TH	ENSMUSG00000059939	9430015G10Rik	V-shape
TH	ENSMUSG00000060093	H4c1	V-shape
TH	ENSMUSG00000060126	Tpt1	V-shape
TH	ENSMUSG00000060639	H4c9	V-shape
TH	ENSMUSG00000060678	H4c3	V-shape
TH	ENSMUSG00000060860	Ube2s	V-shape
TH	ENSMUSG00000060981	H4c8	V-shape
TH	ENSMUSG00000061482	H4c4	V-shape
TH	ENSMUSG00000061533	Cep128	V-shape
TH	ENSMUSG00000061615	H2ac4	V-shape
TH	ENSMUSG00000061991	H2ac10	V-shape
TH	ENSMUSG00000062075	Lmnb2	V-shape
TH	ENSMUSG00000062248	Cks2	V-shape
TH	ENSMUSG00000062380	Tubb3	V-shape
TH	ENSMUSG00000062510	Nsl1	V-shape
TH	ENSMUSG00000062727	H2bc12	V-shape
TH	ENSMUSG00000063021	H2ac15	V-shape
TH	ENSMUSG00000063109	Dgkeos	V-shape
TH	ENSMUSG00000063412	Gm10131	V-shape
TH	ENSMUSG00000063524	Eno1	V-shape
TH	ENSMUSG00000063689	H2ac21	V-shape
TH	ENSMUSG00000063810	Alms1	V-shape
TH	ENSMUSG00000064210	Ano6	V-shape
TH	ENSMUSG00000064288	H4c12	V-shape
TH	ENSMUSG00000064326	Siva1	V-shape
TH	ENSMUSG00000066057	Gm1976	V-shape
TH	ENSMUSG00000066068	Gm13611	V-shape
TH	ENSMUSG00000066878	Gm10184	V-shape
TH	ENSMUSG00000066979	Bub3	V-shape
TH	ENSMUSG00000067224	Gm3695	V-shape
TH	ENSMUSG00000067274	Rplp0	V-shape
TH	ENSMUSG00000067455	H4c11	V-shape
TH	ENSMUSG00000068101	Cenpm	V-shape
TH	ENSMUSG00000068220	Lgals1	V-shape
TH	ENSMUSG00000068744	Psrc1	V-shape
TH	ENSMUSG00000068855	H2ac20	V-shape
TH	ENSMUSG00000069265	H3c1	V-shape
TH	ENSMUSG00000069266	H4c2	V-shape
TH	ENSMUSG00000069267	H3c2	V-shape
TH	ENSMUSG00000069268	H2bc7	V-shape
TH	ENSMUSG00000069270	H2ac6	V-shape
TH	ENSMUSG00000069272	H2ac8	V-shape
TH	ENSMUSG00000069273	H3c6	V-shape
TH	ENSMUSG00000069274	H4c6	V-shape
TH	ENSMUSG00000069300	H2bc11	V-shape
TH	ENSMUSG00000069301	H2ac11	V-shape
TH	ENSMUSG00000069302	H2ac12	V-shape
TH	ENSMUSG00000069305	H4c18	V-shape
TH	ENSMUSG00000069306	H4c17	V-shape
TH	ENSMUSG00000069307	H2bc23	V-shape
TH	ENSMUSG00000069308	H2bc22	V-shape
TH	ENSMUSG00000069309	H2ac22	V-shape
TH	ENSMUSG00000069310	H3c3	V-shape
TH	ENSMUSG00000069910	Spdl1	V-shape
TH	ENSMUSG00000071041	Impdh2-ps	V-shape
TH	ENSMUSG00000071478	H2ac7	V-shape
TH	ENSMUSG00000071516	H2ac13	V-shape
TH	ENSMUSG00000071547	Nt5dc2	V-shape
TH	ENSMUSG00000072082	Ccnf	V-shape
TH	ENSMUSG00000072980	Oip5	V-shape
TH	ENSMUSG00000073434	Wdr90	V-shape
TH	ENSMUSG00000073538	E330020D12Rik	V-shape
TH	ENSMUSG00000073554	Gm6960	V-shape
TH	ENSMUSG00000073705	Cenps	V-shape
TH	ENSMUSG00000074088	Snrnp40	V-shape
TH	ENSMUSG00000074476	Spc24	V-shape
TH	ENSMUSG00000074802	Gas2l3	V-shape
TH	ENSMUSG00000075031	H2bc3	V-shape
TH	ENSMUSG00000075266	Cenpw	V-shape
TH	ENSMUSG00000075502	Kbtbd6	V-shape
TH	ENSMUSG00000076437	Selenoh	V-shape
TH	ENSMUSG00000076870	Trdj1	V-shape
TH	ENSMUSG00000077285	ENSMUSG00000077285	V-shape
TH	ENSMUSG00000078154	Gm12184	V-shape
TH	ENSMUSG00000078521	Aunip	V-shape
TH	ENSMUSG00000078762	Haus5	V-shape
TH	ENSMUSG00000078773	Rad54b	V-shape
TH	ENSMUSG00000078812	Eif5a	V-shape
TH	ENSMUSG00000078941	Ak6	V-shape
TH	ENSMUSG00000078965	Gm12033	V-shape
TH	ENSMUSG00000079003	Samd1	V-shape
TH	ENSMUSG00000079067	Hmgn2-ps1	V-shape
TH	ENSMUSG00000079139	Gm4204	V-shape
TH	ENSMUSG00000079429	Mroh2a	V-shape
TH	ENSMUSG00000079491	H2-T10	V-shape
TH	ENSMUSG00000079553	Kifc1	V-shape
TH	ENSMUSG00000079685	Ulbp1	V-shape
TH	ENSMUSG00000080712	H2bu1-ps	V-shape
TH	ENSMUSG00000081058	H3c15	V-shape
TH	ENSMUSG00000081656	Gm11246	V-shape
TH	ENSMUSG00000081670	Gm15697	V-shape
TH	ENSMUSG00000081792	Anp32b-ps1	V-shape
TH	ENSMUSG00000081999	Gm13461	V-shape
TH	ENSMUSG00000082111	Gm12479	V-shape
TH	ENSMUSG00000082674	Gm11914	V-shape
TH	ENSMUSG00000082988	Gm5903	V-shape
TH	ENSMUSG00000083207	Gm14780	V-shape
TH	ENSMUSG00000083407	Gm13176	V-shape
TH	ENSMUSG00000083668	Gm5648	V-shape
TH	ENSMUSG00000084133	Gm12856	V-shape
TH	ENSMUSG00000084301	Gm7856	V-shape
TH	ENSMUSG00000084353	Gm15452	V-shape
TH	ENSMUSG00000084883	Ccdc85c	V-shape
TH	ENSMUSG00000086103	Gm11832	V-shape
TH	ENSMUSG00000086173	Kis2	V-shape
TH	ENSMUSG00000086421	Gm14091	V-shape
TH	ENSMUSG00000087038	2900079G21Rik	V-shape
TH	ENSMUSG00000087060	Eldr	V-shape
TH	ENSMUSG00000087651	1500009L16Rik	V-shape
TH	ENSMUSG00000089965	Gm16236	V-shape
TH	ENSMUSG00000090698	Apold1	V-shape
TH	ENSMUSG00000091405	H4c14	V-shape
TH	ENSMUSG00000093726	Gm20667	V-shape
TH	ENSMUSG00000093930	Hmgcs1	V-shape
TH	ENSMUSG00000094248	H2ac23	V-shape
TH	ENSMUSG00000094338	H2bc13	V-shape
TH	ENSMUSG00000094595	Fsbp	V-shape
TH	ENSMUSG00000094708	Gm10359	V-shape
TH	ENSMUSG00000095159	Tubb4b-ps1	V-shape
TH	ENSMUSG00000095217	H2bc15	V-shape
TH	ENSMUSG00000096010	H4f16	V-shape
TH	ENSMUSG00000097589	Dleu2	V-shape
TH	ENSMUSG00000098090	2700099C18Rik	V-shape
TH	ENSMUSG00000098318	Lockd	V-shape
TH	ENSMUSG00000099517	H3c8	V-shape
TH	ENSMUSG00000099583	H3c4	V-shape
TH	ENSMUSG00000100210	H3c7	V-shape
TH	ENSMUSG00000101355	H3c10	V-shape
TH	ENSMUSG00000101972	H3c11	V-shape
TH	ENSMUSG00000102114	BC048559	V-shape
TH	ENSMUSG00000102246	9430037O13Rik	V-shape
TH	ENSMUSG00000103445	Gm36948	V-shape
TH	ENSMUSG00000103569	Gm38067	V-shape
TH	ENSMUSG00000104164	Gm38248	V-shape
TH	ENSMUSG00000104876	Trdc	V-shape
TH	ENSMUSG00000105124	Gm5297	V-shape
TH	ENSMUSG00000105199	Gm43581	V-shape
TH	ENSMUSG00000105703	Gm43305	V-shape
TH	ENSMUSG00000105949	Gm6510	V-shape
TH	ENSMUSG00000105987	AI506816	V-shape
TH	ENSMUSG00000106241	Gm43143	V-shape
TH	ENSMUSG00000106262	Gm43375	V-shape
TH	ENSMUSG00000106464	C130083M11Rik	V-shape
TH	ENSMUSG00000106869	Gm42473	V-shape
TH	ENSMUSG00000106878	Gm17808	V-shape
TH	ENSMUSG00000107263	Gm42471	V-shape
TH	ENSMUSG00000107730	Gm44238	V-shape
TH	ENSMUSG00000107771	Gm8956	V-shape
TH	ENSMUSG00000108312	Gm44521	V-shape
TH	ENSMUSG00000108688	Gm44985	V-shape
TH	ENSMUSG00000109086	Gm5596	V-shape
TH	ENSMUSG00000109511	Nup62	V-shape
TH	ENSMUSG00000109910	Gm45240	V-shape
TH	ENSMUSG00000109940	Gm45399	V-shape
TH	ENSMUSG00000110644	Gm7390	V-shape
TH	ENSMUSG00000110660	Gm5362	V-shape
TH	ENSMUSG00000111069	Gm48646	V-shape
TH	ENSMUSG00000111617	Gm47148	V-shape
TH	ENSMUSG00000112026	Gm6653	V-shape
TH	ENSMUSG00000112222	Tyms-ps	V-shape
TH	ENSMUSG00000112406	4921515L22Rik	V-shape
TH	ENSMUSG00000112808	Gm4739	V-shape
TH	ENSMUSG00000112932	Gm48308	V-shape
TH	ENSMUSG00000112980	D430020J02Rik	V-shape
TH	ENSMUSG00000113540	Gm47206	V-shape
TH	ENSMUSG00000113811	Gm47882	V-shape
TH	ENSMUSG00000113996	Gm48455	V-shape
TH	ENSMUSG00000114279	H2bc14	V-shape
TH	ENSMUSG00000114447	Gm47636	V-shape
TH	ENSMUSG00000114456	H2bc9	V-shape
TH	ENSMUSG00000114533	Gm8416	V-shape
TH	ENSMUSG00000115306	Gm49159	V-shape
TH	ENSMUSG00000115431	Gm3219	V-shape
TH	ENSMUSG00000115522	Gm49173	V-shape
TH	ENSMUSG00000116864	Gm3320	V-shape
TH	ENSMUSG00000116912	Gm5487	V-shape
TH	ENSMUSG00000117640	Gm7411	V-shape
TH	ENSMUSG00000117666	Gm550	V-shape
TH	ENSMUSG00000117988	Gm8663	V-shape
TH	ENSMUSG00000118211	Gm46649	V-shape
TH	ENSMUSG00000118653	Gm2296	V-shape
SP	ENSMUSG00000022122	Ednrb	reverse V-shape
SP	ENSMUSG00000027875	Hmgcs2	reverse V-shape
SP	ENSMUSG00000078877	Gm14295	reverse V-shape
SP	ENSMUSG00000096326	Ighv1-78	reverse V-shape
SP	ENSMUSG00000105909	Gm43189	reverse V-shape
LN	ENSMUSG00000001865	Cpa3	reverse V-shape
LN	ENSMUSG00000002265	Peg3	reverse V-shape
LN	ENSMUSG00000002289	Angptl4	reverse V-shape
LN	ENSMUSG00000005339	Fcer1a	reverse V-shape
LN	ENSMUSG00000009378	Slc16a12	reverse V-shape
LN	ENSMUSG00000019577	Pdk4	reverse V-shape
LN	ENSMUSG00000021922	Itih4	reverse V-shape
LN	ENSMUSG00000022122	Ednrb	reverse V-shape
LN	ENSMUSG00000022123	Scel	reverse V-shape
LN	ENSMUSG00000022146	Osmr	reverse V-shape
LN	ENSMUSG00000022225	Cma1	reverse V-shape
LN	ENSMUSG00000025993	Slc40a1	reverse V-shape
LN	ENSMUSG00000026069	Il1rl1	reverse V-shape
LN	ENSMUSG00000027875	Hmgcs2	reverse V-shape
LN	ENSMUSG00000028883	Sema3a	reverse V-shape
LN	ENSMUSG00000030022	Adamts9	reverse V-shape
LN	ENSMUSG00000031765	Mt1	reverse V-shape
LN	ENSMUSG00000034652	Cd300a	reverse V-shape
LN	ENSMUSG00000046318	Ccbe1	reverse V-shape
LN	ENSMUSG00000070547	Mrgprb1	reverse V-shape
LN	ENSMUSG00000076564	Igkv12-46	reverse V-shape
LN	ENSMUSG00000076676	Ighv12-3	reverse V-shape
LN	ENSMUSG00000090698	Apold1	reverse V-shape
LN	ENSMUSG00000094787	Ighv1-54	reverse V-shape
LN	ENSMUSG00000096326	Ighv1-78	reverse V-shape
LN	ENSMUSG00000105909	Gm43189	reverse V-shape
LN	ENSMUSG00000109841	E330011O21Rik	reverse V-shape
LN	ENSMUSG00000114828	AI463229	reverse V-shape
LN	ENSMUSG00000005124	Ccn4	V-shape

## Sheet: S9
Supplementary Table 9. List of genes whose IR were recovered by artificial gravity in RIKEN data
Tissue	Locus (ensembl id)	Locus (ensemble id)	ensembl id	symbol	type
TH	ENSMUSG00000000759,chr8:12624950-12625023	Tubgcp3,chr8:12624950-12625023	ENSMUSG00000000759	Tubgcp3	reverse V-shape
TH	ENSMUSG00000001248,chr7:31134518-31135595	Gramd1a,chr7:31134518-31135595	ENSMUSG00000001248	Gramd1a	reverse V-shape
TH	ENSMUSG00000001524,chr17:35670746-35670864	Gtf2h4,chr17:35670746-35670864	ENSMUSG00000001524	Gtf2h4	reverse V-shape
TH	ENSMUSG00000001588,chr11:69884492-69884584	Acap1,chr11:69884492-69884584	ENSMUSG00000001588	Acap1	reverse V-shape
TH	ENSMUSG00000002625,chr17:32334697-32335561	Akap8l,chr17:32334697-32335561	ENSMUSG00000002625	Akap8l	reverse V-shape
TH	ENSMUSG00000002963,chr7:44858210-44858451	Pnkp,chr7:44858210-44858451	ENSMUSG00000002963	Pnkp	reverse V-shape
TH	ENSMUSG00000003099,chr7:17008713-17008991	Ppp5c,chr7:17008713-17008991	ENSMUSG00000003099	Ppp5c	reverse V-shape
TH	ENSMUSG00000004266,chr6:124720909-124721078	Ptpn6,chr6:124720909-124721078	ENSMUSG00000004266	Ptpn6	reverse V-shape
TH	ENSMUSG00000005687,chr3:103175670-103177337	Bcas2,chr3:103175670-103177337	ENSMUSG00000005687	Bcas2	reverse V-shape
TH	ENSMUSG00000006179,chr13:22003072-22003144	Prss16,chr13:22003072-22003144	ENSMUSG00000006179	Prss16	reverse V-shape
TH	ENSMUSG00000006676,chr9:108498037-108498121	Usp19,chr9:108498037-108498121	ENSMUSG00000006676	Usp19	reverse V-shape
TH	ENSMUSG00000007029,chr17:35013748-35013826	Vars,chr17:35013748-35013826	ENSMUSG00000007029	Vars	reverse V-shape
TH	ENSMUSG00000007880,chr4:133695662-133695914	Arid1a,chr4:133695662-133695914	ENSMUSG00000007880	Arid1a	reverse V-shape
TH	ENSMUSG00000015656,chr9:40802624-40802737	Hspa8,chr9:40802624-40802737	ENSMUSG00000015656	Hspa8	reverse V-shape
TH	ENSMUSG00000017754,chr2:164852537-164852615	Pltp,chr2:164852537-164852615	ENSMUSG00000017754	Pltp	reverse V-shape
TH	ENSMUSG00000019338,chr3:95008493-95008583	Zfp687,chr3:95008493-95008583	ENSMUSG00000019338	Zfp687	reverse V-shape
TH	ENSMUSG00000020385,chr11:51275579-51275768	Clk4,chr11:51275579-51275768	ENSMUSG00000020385	Clk4	reverse V-shape
TH	ENSMUSG00000020477,chr11:5707410-5707485	Mrps24,chr11:5707410-5707485	ENSMUSG00000020477	Mrps24	reverse V-shape
TH	ENSMUSG00000021957,chr14:30558839-30559750	Tkt,chr14:30558839-30559750	ENSMUSG00000021957	Tkt	reverse V-shape
TH	ENSMUSG00000022463,chr15:82170155-82171100	Srebf2,chr15:82170155-82171100	ENSMUSG00000022463	Srebf2	reverse V-shape
TH	ENSMUSG00000022469,chr15:97748671-97749494	Rapgef3,chr15:97748671-97749494	ENSMUSG00000022469	Rapgef3	reverse V-shape
TH	ENSMUSG00000022475,chr15:97800803-97802074	Hdac7,chr15:97800803-97802074	ENSMUSG00000022475	Hdac7	reverse V-shape
TH	ENSMUSG00000022710,chr16:8697995-8698450	Usp7,chr16:8697995-8698450	ENSMUSG00000022710	Usp7	reverse V-shape
TH	ENSMUSG00000022884,chr16:23110724-23111124	Eif4a2,chr16:23110724-23111124	ENSMUSG00000022884	Eif4a2	reverse V-shape
TH	ENSMUSG00000024287,chr18:9986356-9986551	Thoc1,chr18:9986356-9986551	ENSMUSG00000024287	Thoc1	reverse V-shape
TH	ENSMUSG00000024560,chr18:74219239-74219381	Cxxc1,chr18:74219239-74219381	ENSMUSG00000024560	Cxxc1	reverse V-shape
TH	ENSMUSG00000024908,chr19:3484917-3486974	Ppp6r3,chr19:3484917-3486974	ENSMUSG00000024908	Ppp6r3	reverse V-shape
TH	ENSMUSG00000024948,chr19:6346126-6346207	Map4k2,chr19:6346126-6346207	ENSMUSG00000024948	Map4k2	reverse V-shape
TH	ENSMUSG00000025571,chr11:117749818-117752975	Tnrc6c,chr11:117749818-117752975	ENSMUSG00000025571	Tnrc6c	reverse V-shape
TH	ENSMUSG00000025651,chr9:108947480-108947596	Uqcrc1,chr9:108947480-108947596	ENSMUSG00000025651	Uqcrc1	reverse V-shape
TH	ENSMUSG00000025722,chr7:80891910-80892974	Wdr73,chr7:80891910-80892974	ENSMUSG00000025722	Wdr73	reverse V-shape
TH	ENSMUSG00000026860,chr2:30345940-30346351	Sh3glb2,chr2:30345940-30346351	ENSMUSG00000026860	Sh3glb2	reverse V-shape
TH	ENSMUSG00000027423,chr2:144254813-144254901	Snx5,chr2:144254813-144254901	ENSMUSG00000027423	Snx5	reverse V-shape
TH	ENSMUSG00000027936,chr3:90257219-90257293	Crtc2,chr3:90257219-90257293	ENSMUSG00000027936	Crtc2	reverse V-shape
TH	ENSMUSG00000029472,chr5:122791756-122791825	Anapc5,chr5:122791756-122791825	ENSMUSG00000029472	Anapc5	reverse V-shape
TH	ENSMUSG00000029599,chr5:120626040-120626399	Ddx54,chr5:120626040-120626399	ENSMUSG00000029599	Ddx54	reverse V-shape
TH	ENSMUSG00000030057,chr6:87845321-87845463	Cnbp,chr6:87845321-87845463	ENSMUSG00000030057	Cnbp	reverse V-shape
TH	ENSMUSG00000031167,chrX:8143948-8144571	Rbm3,chrX:8143948-8144571	ENSMUSG00000031167	Rbm3	reverse V-shape
TH	ENSMUSG00000031532,chr8:34167858-34168455	Saraf,chr8:34167858-34168455	ENSMUSG00000031532	Saraf	reverse V-shape
TH	ENSMUSG00000032590,chr9:108092883-108092979	Apeh,chr9:108092883-108092979	ENSMUSG00000032590	Apeh	reverse V-shape
TH	ENSMUSG00000033589,chr14:70547007-70547113	Reep4,chr14:70547007-70547113	ENSMUSG00000033589	Reep4	reverse V-shape
TH	ENSMUSG00000033685,chr7:100494376-100496724	Ucp2,chr7:100494376-100496724	ENSMUSG00000033685	Ucp2	reverse V-shape
TH	ENSMUSG00000035478,chr10:80393019-80393093	Mbd3,chr10:80393019-80393093	ENSMUSG00000035478	Mbd3	reverse V-shape
TH	ENSMUSG00000035781,chr10:79911998-79912073	R3hdm4,chr10:79911998-79912073	ENSMUSG00000035781	R3hdm4	reverse V-shape
TH	ENSMUSG00000035929,chr17:35380174-35380359	H2-Q4,chr17:35380174-35380359	ENSMUSG00000035929	H2-Q4	reverse V-shape
TH	ENSMUSG00000036550,chr8:95772175-95773430	Cnot1,chr8:95772175-95773430	ENSMUSG00000036550	Cnot1	reverse V-shape
TH	ENSMUSG00000037400,chr3:35837590-35839047	Atp11b,chr3:35837590-35839047	ENSMUSG00000037400	Atp11b	reverse V-shape
TH	ENSMUSG00000038502,chr7:44863733-44864381	Ptov1,chr7:44863733-44864381	ENSMUSG00000038502	Ptov1	reverse V-shape
TH	ENSMUSG00000039001,chr2:180257684-180257786	Rps21,chr2:180257684-180257786	ENSMUSG00000039001	Rps21	reverse V-shape
TH	ENSMUSG00000040331,chr7:130533667-130533768	Nsmce4a,chr7:130533667-130533768	ENSMUSG00000040331	Nsmce4a	reverse V-shape
TH	ENSMUSG00000040746,chr11:70650018-70650124	Rnf167,chr11:70650018-70650124	ENSMUSG00000040746	Rnf167	reverse V-shape
TH	ENSMUSG00000040940,chr7:24912156-24912308	Arhgef1,chr7:24912156-24912308	ENSMUSG00000040940	Arhgef1	reverse V-shape
TH	ENSMUSG00000042524,chr15:79728085-79728414	Sun2,chr15:79728085-79728414	ENSMUSG00000042524	Sun2	reverse V-shape
TH	ENSMUSG00000052142,chr17:32392204-32392396	Rasal3,chr17:32392204-32392396	ENSMUSG00000052142	Rasal3	reverse V-shape
TH	ENSMUSG00000053332,chr1:161036015-161036206	Gas5,chr1:161036015-161036206	ENSMUSG00000053332	Gas5	reverse V-shape
TH	ENSMUSG00000055024,chr15:81639892-81639993	Ep300,chr15:81639892-81639993	ENSMUSG00000055024	Ep300	reverse V-shape
TH	ENSMUSG00000056919,chr9:87238385-87239813	Cep162,chr9:87238385-87239813	ENSMUSG00000056919	Cep162	reverse V-shape
TH	ENSMUSG00000058569,chr13:55593358-55593499	Tmed9,chr13:55593358-55593499	ENSMUSG00000058569	Tmed9	reverse V-shape
TH	ENSMUSG00000059208,chr17:33666530-33666645	Hnrnpm,chr17:33666530-33666645	ENSMUSG00000059208	Hnrnpm	reverse V-shape
TH	ENSMUSG00000062908,chr3:153938967-153939068	Acadm,chr3:153938967-153939068	ENSMUSG00000062908	Acadm	reverse V-shape
TH	ENSMUSG00000064127,chrX:12706446-12706530	Med14,chrX:12706446-12706530	ENSMUSG00000064127	Med14	reverse V-shape
TH	ENSMUSG00000066979,chr7:131561607-131563332	Bub3,chr7:131561607-131563332	ENSMUSG00000066979	Bub3	reverse V-shape
TH	ENSMUSG00000071644,chr19:8969226-8969362	Eef1g,chr19:8969226-8969362	ENSMUSG00000071644	Eef1g	reverse V-shape
TH	ENSMUSG00000074578,chr2:167065218-167065432	Zfas1,chr2:167065218-167065432	ENSMUSG00000074578	Zfas1	reverse V-shape
TH	ENSMUSG00000078619,chr11:106265038-106265181	Smarcd2,chr11:106265038-106265181	ENSMUSG00000078619	Smarcd2	reverse V-shape
TH	ENSMUSG00000000486,chr7:127217743-127217969	Septin1,chr7:127217743-127217969	ENSMUSG00000000486	Septin1	V-shape
TH	ENSMUSG00000000787,chrX:13287384-13287462	Ddx3x,chrX:13287384-13287462	ENSMUSG00000000787	Ddx3x	V-shape
TH	ENSMUSG00000001588,chr11:69884866-69885391	Acap1,chr11:69884866-69885391	ENSMUSG00000001588	Acap1	V-shape
TH	ENSMUSG00000002833,chr17:56099076-56099175	Hdgfl2,chr17:56099076-56099175	ENSMUSG00000002833	Hdgfl2	V-shape
TH	ENSMUSG00000010608,chr12:83660679-83663977	Rbm25,chr12:83660679-83663977	ENSMUSG00000010608	Rbm25	V-shape
TH	ENSMUSG00000011877,chr11:77503429-77503919	Git1,chr11:77503429-77503919	ENSMUSG00000011877	Git1	V-shape
TH	ENSMUSG00000020048,chr10:86691749-86692138	Hsp90b1,chr10:86691749-86692138	ENSMUSG00000020048	Hsp90b1	V-shape
TH	ENSMUSG00000020250,chr10:82879349-82879748	Txnrd1,chr10:82879349-82879748	ENSMUSG00000020250	Txnrd1	V-shape
TH	ENSMUSG00000021134,chr12:80947866-80949093	Srsf5,chr12:80947866-80949093	ENSMUSG00000021134	Srsf5	V-shape
TH	ENSMUSG00000021483,chr13:64437513-64437875	Cdk20,chr13:64437513-64437875	ENSMUSG00000021483	Cdk20	V-shape
TH	ENSMUSG00000021486,chr13:55324445-55324525	Prelid1,chr13:55324445-55324525	ENSMUSG00000021486	Prelid1	V-shape
TH	ENSMUSG00000022407,chr15:80963730-80963878	Adsl,chr15:80963730-80963878	ENSMUSG00000022407	Adsl	V-shape
TH	ENSMUSG00000022488,chr15:103473599-103473798	Nckap1l,chr15:103473599-103473798	ENSMUSG00000022488	Nckap1l	V-shape
TH	ENSMUSG00000022884,chr16:23110154-23110232	Eif4a2,chr16:23110154-23110232	ENSMUSG00000022884	Eif4a2	V-shape
TH	ENSMUSG00000023277,chr9:106212837-106212936	Twf2,chr9:106212837-106212936	ENSMUSG00000023277	Twf2	V-shape
TH	ENSMUSG00000023277,chr9:106214252-106214354	Twf2,chr9:106214252-106214354	ENSMUSG00000023277	Twf2	V-shape
TH	ENSMUSG00000024042,chr17:31849082-31849517	Sik1,chr17:31849082-31849517	ENSMUSG00000024042	Sik1	V-shape
TH	ENSMUSG00000024338,chr17:34200271-34200709	Psmb8,chr17:34200271-34200709	ENSMUSG00000024338	Psmb8	V-shape
TH	ENSMUSG00000025138,chr11:120619050-120620161	Sirt7,chr11:120619050-120620161	ENSMUSG00000025138	Sirt7	V-shape
TH	ENSMUSG00000026193,chr1:71597388-71598372	Fn1,chr1:71597388-71598372	ENSMUSG00000026193	Fn1	V-shape
TH	ENSMUSG00000026571,chr1:165338345-165339883	Dcaf6,chr1:165338345-165339883	ENSMUSG00000026571	Dcaf6	V-shape
TH	ENSMUSG00000028034,chr3:152232023-152234522	Fubp1,chr3:152232023-152234522	ENSMUSG00000028034	Fubp1	V-shape
TH	ENSMUSG00000028099,chr3:96723700-96723795	Polr3c,chr3:96723700-96723795	ENSMUSG00000028099	Polr3c	V-shape
TH	ENSMUSG00000028245,chr4:6417208-6417744	Nsmaf,chr4:6417208-6417744	ENSMUSG00000028245	Nsmaf	V-shape
TH	ENSMUSG00000028467,chr4:43570191-43570344	Gba2,chr4:43570191-43570344	ENSMUSG00000028467	Gba2	V-shape
TH	ENSMUSG00000028656,chr4:122862747-122862899	Cap1,chr4:122862747-122862899	ENSMUSG00000028656	Cap1	V-shape
TH	ENSMUSG00000029056,chr4:154979026-154979490	Pank4,chr4:154979026-154979490	ENSMUSG00000029056	Pank4	V-shape
TH	ENSMUSG00000029389,chr5:124554758-124556755	Ddx55,chr5:124554758-124556755	ENSMUSG00000029389	Ddx55	V-shape
TH	ENSMUSG00000029647,chr5:147545736-147546363	Pan3,chr5:147545736-147546363	ENSMUSG00000029647	Pan3	V-shape
TH	ENSMUSG00000029782,chr6:30506918-30508452	Tmem209,chr6:30506918-30508452	ENSMUSG00000029782	Tmem209	V-shape
TH	ENSMUSG00000030180,chr6:120427873-120428216	Kdm5a,chr6:120427873-120428216	ENSMUSG00000030180	Kdm5a	V-shape
TH	ENSMUSG00000030822,chr7:127473717-127473795	Prr14,chr7:127473717-127473795	ENSMUSG00000030822	Prr14	V-shape
TH	ENSMUSG00000031389,chrX:73900184-73900276	Arhgap4,chrX:73900184-73900276	ENSMUSG00000031389	Arhgap4	V-shape
TH	ENSMUSG00000031601,chr8:40499440-40500750	Cnot7,chr8:40499440-40500750	ENSMUSG00000031601	Cnot7	V-shape
TH	ENSMUSG00000031862,chr8:69798514-69798582	Atp13a1,chr8:69798514-69798582	ENSMUSG00000031862	Atp13a1	V-shape
TH	ENSMUSG00000031939,chr9:15314033-15314229	Taf1d,chr9:15314033-15314229	ENSMUSG00000031939	Taf1d	V-shape
TH	ENSMUSG00000031939,chr9:15314265-15315100	Taf1d,chr9:15314265-15315100	ENSMUSG00000031939	Taf1d	V-shape
TH	ENSMUSG00000032127,chr9:44353999-44354101	Vps11,chr9:44353999-44354101	ENSMUSG00000032127	Vps11	V-shape
TH	ENSMUSG00000032185,chr9:21587586-21587849	Carm1,chr9:21587586-21587849	ENSMUSG00000032185	Carm1	V-shape
TH	ENSMUSG00000032316,chr9:57758351-57758625	Clk3,chr9:57758351-57758625	ENSMUSG00000032316	Clk3	V-shape
TH	ENSMUSG00000032596,chr9:107979459-107979542	Uba7,chr9:107979459-107979542	ENSMUSG00000032596	Uba7	V-shape
TH	ENSMUSG00000033916,chr7:13032566-13032640	Chmp2a,chr7:13032566-13032640	ENSMUSG00000033916	Chmp2a	V-shape
TH	ENSMUSG00000034218,chr9:53533773-53533863	Atm,chr9:53533773-53533863	ENSMUSG00000034218	Atm	V-shape
TH	ENSMUSG00000034432,chr1:90604446-90605462	Cops8,chr1:90604446-90605462	ENSMUSG00000034432	Cops8	V-shape
TH	ENSMUSG00000034616,chr19:4264461-4265101	Ssh3,chr19:4264461-4265101	ENSMUSG00000034616	Ssh3	V-shape
TH	ENSMUSG00000035890,chr10:79761500-79761563	Rnf126,chr10:79761500-79761563	ENSMUSG00000035890	Rnf126	V-shape
TH	ENSMUSG00000036622,chr4:141002547-141002622	Atp13a2,chr4:141002547-141002622	ENSMUSG00000036622	Atp13a2	V-shape
TH	ENSMUSG00000039615,chr17:25831219-25831307	Stub1,chr17:25831219-25831307	ENSMUSG00000039615	Stub1	V-shape
TH	ENSMUSG00000042524,chr15:79728582-79729031	Sun2,chr15:79728582-79729031	ENSMUSG00000042524	Sun2	V-shape
TH	ENSMUSG00000042606,chr7:126862721-126862816	Hirip3,chr7:126862721-126862816	ENSMUSG00000042606	Hirip3	V-shape
TH	ENSMUSG00000042726,chr5:121373475-121373945	Trafd1,chr5:121373475-121373945	ENSMUSG00000042726	Trafd1	V-shape
TH	ENSMUSG00000053332,chr1:161037165-161037286	Gas5,chr1:161037165-161037286	ENSMUSG00000053332	Gas5	V-shape
TH	ENSMUSG00000053907,chr6:72434396-72434979	Mat2a,chr6:72434396-72434979	ENSMUSG00000053907	Mat2a	V-shape
TH	ENSMUSG00000054405,chr4:132544123-132544655	Dnajc8,chr4:132544123-132544655	ENSMUSG00000054405	Dnajc8	V-shape
TH	ENSMUSG00000068917,chr3:89169703-89170047	Clk2,chr3:89169703-89170047	ENSMUSG00000068917	Clk2	V-shape
TH	ENSMUSG00000070034,chr1:85579200-85579642	Sp110,chr1:85579200-85579642	ENSMUSG00000070034	Sp110	V-shape
TH	ENSMUSG00000074643,chr2:156078824-156078898	Cpne1,chr2:156078824-156078898	ENSMUSG00000074643	Cpne1	V-shape
SP	ENSMUSG00000002668,chr17:57066943-57067047	Dennd1c,chr17:57066943-57067047	ENSMUSG00000002668	Dennd1c	reverse V-shape
SP	ENSMUSG00000004268,chr6:124705089-124705156	Emg1,chr6:124705089-124705156	ENSMUSG00000004268	Emg1	reverse V-shape
SP	ENSMUSG00000006676,chr9:108498037-108498121	Usp19,chr9:108498037-108498121	ENSMUSG00000006676	Usp19	reverse V-shape
SP	ENSMUSG00000007029,chr17:35013748-35013826	Vars,chr17:35013748-35013826	ENSMUSG00000007029	Vars	reverse V-shape
SP	ENSMUSG00000011877,chr11:77505591-77505678	Git1,chr11:77505591-77505678	ENSMUSG00000011877	Git1	reverse V-shape
SP	ENSMUSG00000015165,chr7:28818533-28818642	Hnrnpl,chr7:28818533-28818642	ENSMUSG00000015165	Hnrnpl	reverse V-shape
SP	ENSMUSG00000018076,chr5:118749829-118750844	Med13l,chr5:118749829-118750844	ENSMUSG00000018076	Med13l	reverse V-shape
SP	ENSMUSG00000019087,chrX:74300772-74301322	Atp6ap1,chrX:74300772-74301322	ENSMUSG00000019087	Atp6ap1	reverse V-shape
SP	ENSMUSG00000019338,chr3:95008918-95009074	Zfp687,chr3:95008918-95009074	ENSMUSG00000019338	Zfp687	reverse V-shape
SP	ENSMUSG00000020640,chr12:4712037-4712465	Itsn2,chr12:4712037-4712465	ENSMUSG00000020640	Itsn2	reverse V-shape
SP	ENSMUSG00000022475,chr15:97800803-97802074	Hdac7,chr15:97800803-97802074	ENSMUSG00000022475	Hdac7	reverse V-shape
SP	ENSMUSG00000024338,chr17:34200271-34200709	Psmb8,chr17:34200271-34200709	ENSMUSG00000024338	Psmb8	reverse V-shape
SP	ENSMUSG00000024446,chr17:36257525-36257604	Rpp21,chr17:36257525-36257604	ENSMUSG00000024446	Rpp21	reverse V-shape
SP	ENSMUSG00000024807,chr19:6048368-6048453	Syvn1,chr19:6048368-6048453	ENSMUSG00000024807	Syvn1	reverse V-shape
SP	ENSMUSG00000027433,chr2:147029785-147029867	Xrn2,chr2:147029785-147029867	ENSMUSG00000027433	Xrn2	reverse V-shape
SP	ENSMUSG00000028099,chr3:96723700-96723795	Polr3c,chr3:96723700-96723795	ENSMUSG00000028099	Polr3c	reverse V-shape
SP	ENSMUSG00000028248,chr4:21869616-21870350	Pnisr,chr4:21869616-21870350	ENSMUSG00000028248	Pnisr	reverse V-shape
SP	ENSMUSG00000028954,chr5:24694762-24695518	Nub1,chr5:24694762-24695518	ENSMUSG00000028954	Nub1	reverse V-shape
SP	ENSMUSG00000029068,chr4:155817988-155820327	Ccnl2,chr4:155817988-155820327	ENSMUSG00000029068	Ccnl2	reverse V-shape
SP	ENSMUSG00000029433,chr5:123517834-123517953	Diablo,chr5:123517834-123517953	ENSMUSG00000029433	Diablo	reverse V-shape
SP	ENSMUSG00000029661,chr6:4534689-4535379	Col1a2,chr6:4534689-4535379	ENSMUSG00000029661	Col1a2	reverse V-shape
SP	ENSMUSG00000030058,chr6:87892720-87893794	Copg1,chr6:87892720-87893794	ENSMUSG00000030058	Copg1	reverse V-shape
SP	ENSMUSG00000031708,chr8:83572947-83573026	Tecr,chr8:83572947-83573026	ENSMUSG00000031708	Tecr	reverse V-shape
SP	ENSMUSG00000031897,chr8:105936755-105936864	Psmb10,chr8:105936755-105936864	ENSMUSG00000031897	Psmb10	reverse V-shape
SP	ENSMUSG00000031939,chr9:15314265-15315100	Taf1d,chr9:15314265-15315100	ENSMUSG00000031939	Taf1d	reverse V-shape
SP	ENSMUSG00000032280,chr9:61411340-61412263	Tle3,chr9:61411340-61412263	ENSMUSG00000032280	Tle3	reverse V-shape
SP	ENSMUSG00000032480,chr9:110085879-110085948	Dhx30,chr9:110085879-110085948	ENSMUSG00000032480	Dhx30	reverse V-shape
SP	ENSMUSG00000033364,chr1:74468385-74470535	Usp37,chr1:74468385-74470535	ENSMUSG00000033364	Usp37	reverse V-shape
SP	ENSMUSG00000034616,chr19:4266447-4266520	Ssh3,chr19:4266447-4266520	ENSMUSG00000034616	Ssh3	reverse V-shape
SP	ENSMUSG00000035047,chr9:21281740-21281813	Kri1,chr9:21281740-21281813	ENSMUSG00000035047	Kri1	reverse V-shape
SP	ENSMUSG00000036046,chr15:84950775-84953128	5031439G07Rik,chr15:84950775-84953128	ENSMUSG00000036046	5031439G07Rik	reverse V-shape
SP	ENSMUSG00000037266,chr4:134925433-134926733	Rsrp1,chr4:134925433-134926733	ENSMUSG00000037266	Rsrp1	reverse V-shape
SP	ENSMUSG00000037318,chr1:193194550-193194823	Traf3ip3,chr1:193194550-193194823	ENSMUSG00000037318	Traf3ip3	reverse V-shape
SP	ENSMUSG00000037400,chr3:35837590-35839047	Atp11b,chr3:35837590-35839047	ENSMUSG00000037400	Atp11b	reverse V-shape
SP	ENSMUSG00000038374,chr3:96631569-96631687	Rbm8a,chr3:96631569-96631687	ENSMUSG00000038374	Rbm8a	reverse V-shape
SP	ENSMUSG00000042404,chr3:90277905-90277986	Dennd4b,chr3:90277905-90277986	ENSMUSG00000042404	Dennd4b	reverse V-shape
SP	ENSMUSG00000052593,chr12:21329133-21330031	Adam17,chr12:21329133-21330031	ENSMUSG00000052593	Adam17	reverse V-shape
SP	ENSMUSG00000053332,chr1:161036015-161036206	Gas5,chr1:161036015-161036206	ENSMUSG00000053332	Gas5	reverse V-shape
SP	ENSMUSG00000053332,chr1:161036245-161036547	Gas5,chr1:161036245-161036547	ENSMUSG00000053332	Gas5	reverse V-shape
SP	ENSMUSG00000057738,chr2:30029675-30029998	Sptan1,chr2:30029675-30029998	ENSMUSG00000057738	Sptan1	reverse V-shape
SP	ENSMUSG00000066232,chr7:110049071-110049594	Ipo7,chr7:110049071-110049594	ENSMUSG00000066232	Ipo7	reverse V-shape
SP	ENSMUSG00000070000,chr8:71717284-71717434	Fcho1,chr8:71717284-71717434	ENSMUSG00000070000	Fcho1	reverse V-shape
SP	ENSMUSG00000071646,chr19:8946385-8946646	Mta2,chr19:8946385-8946646	ENSMUSG00000071646	Mta2	reverse V-shape
SP	ENSMUSG00000072501,chr15:66629982-66630865	Phf20l1,chr15:66629982-66630865	ENSMUSG00000072501	Phf20l1	reverse V-shape
SP	ENSMUSG00000074578,chr2:167065218-167065432	Zfas1,chr2:167065218-167065432	ENSMUSG00000074578	Zfas1	reverse V-shape
SP	ENSMUSG00000115987,chr15:76622563-76622653	Vps28,chr15:76622563-76622653	ENSMUSG00000115987	Vps28	reverse V-shape
SP	ENSMUSG00000000131,chr7:126107233-126108450	Xpo6,chr7:126107233-126108450	ENSMUSG00000000131	Xpo6	V-shape
SP	ENSMUSG00000000787,chrX:13287384-13287462	Ddx3x,chrX:13287384-13287462	ENSMUSG00000000787	Ddx3x	V-shape
SP	ENSMUSG00000000916,chr5:135375486-135375553	Nsun5,chr5:135375486-135375553	ENSMUSG00000000916	Nsun5	V-shape
SP	ENSMUSG00000001416,chr3:88300851-88300927	Cct3,chr3:88300851-88300927	ENSMUSG00000001416	Cct3	V-shape
SP	ENSMUSG00000002014,chrX:73789875-73790357	Ssr4,chrX:73789875-73790357	ENSMUSG00000002014	Ssr4	V-shape
SP	ENSMUSG00000002504,chr17:24641973-24642189	Slc9a3r2,chr17:24641973-24642189	ENSMUSG00000002504	Slc9a3r2	V-shape
SP	ENSMUSG00000002763,chr17:46723736-46723917	Pex6,chr17:46723736-46723917	ENSMUSG00000002763	Pex6	V-shape
SP	ENSMUSG00000005625,chr3:95033765-95033916	Psmd4,chr3:95033765-95033916	ENSMUSG00000005625	Psmd4	V-shape
SP	ENSMUSG00000006024,chr7:16113406-16113474	Napa,chr7:16113406-16113474	ENSMUSG00000006024	Napa	V-shape
SP	ENSMUSG00000009741,chr9:113956069-113956705	Ubp1,chr9:113956069-113956705	ENSMUSG00000009741	Ubp1	V-shape
SP	ENSMUSG00000014778,chr8:105331825-105332035	Fhod1,chr8:105331825-105332035	ENSMUSG00000014778	Fhod1	V-shape
SP	ENSMUSG00000014856,chr8:105328459-105328606	Tmem208,chr8:105328459-105328606	ENSMUSG00000014856	Tmem208	V-shape
SP	ENSMUSG00000016344,chr2:181187737-181187807	Ppdpf,chr2:181187737-181187807	ENSMUSG00000016344	Ppdpf	V-shape
SP	ENSMUSG00000016503,chr5:146953308-146953846	Gtf3a,chr5:146953308-146953846	ENSMUSG00000016503	Gtf3a	V-shape
SP	ENSMUSG00000018287,chr11:70664477-70664576	Spag7,chr11:70664477-70664576	ENSMUSG00000018287	Spag7	V-shape
SP	ENSMUSG00000019254,chr7:4483558-4483641	Ppp1r12c,chr7:4483558-4483641	ENSMUSG00000019254	Ppp1r12c	V-shape
SP	ENSMUSG00000020260,chr10:77265962-77266911	Pofut2,chr10:77265962-77266911	ENSMUSG00000020260	Pofut2	V-shape
SP	ENSMUSG00000020263,chr10:83611067-83611141	Appl2,chr10:83611067-83611141	ENSMUSG00000020263	Appl2	V-shape
SP	ENSMUSG00000020486,chr11:87589819-87589954	Septin4,chr11:87589819-87589954	ENSMUSG00000020486	Septin4	V-shape
SP	ENSMUSG00000020516,chr11:86511667-86511823	Rps6kb1,chr11:86511667-86511823	ENSMUSG00000020516	Rps6kb1	V-shape
SP	ENSMUSG00000020775,chr11:116135117-116135189	Mrpl38,chr11:116135117-116135189	ENSMUSG00000020775	Mrpl38	V-shape
SP	ENSMUSG00000021488,chr13:55213318-55214059	Nsd1,chr13:55213318-55214059	ENSMUSG00000021488	Nsd1	V-shape
SP	ENSMUSG00000021832,chr14:45330910-45330985	Psmc6,chr14:45330910-45330985	ENSMUSG00000021832	Psmc6	V-shape
SP	ENSMUSG00000021866,chr14:25874305-25874669	Anxa11,chr14:25874305-25874669	ENSMUSG00000021866	Anxa11	V-shape
SP	ENSMUSG00000021948,chr14:30607451-30607606	Prkcd,chr14:30607451-30607606	ENSMUSG00000021948	Prkcd	V-shape
SP	ENSMUSG00000022283,chr15:36598128-36598200	Pabpc1,chr15:36598128-36598200	ENSMUSG00000022283	Pabpc1	V-shape
SP	ENSMUSG00000022386,chr15:85896505-85896833	Trmu,chr15:85896505-85896833	ENSMUSG00000022386	Trmu	V-shape
SP	ENSMUSG00000022463,chr15:82170155-82171100	Srebf2,chr15:82170155-82171100	ENSMUSG00000022463	Srebf2	V-shape
SP	ENSMUSG00000022515,chr16:4947759-4948224	Anks3,chr16:4947759-4948224	ENSMUSG00000022515	Anks3	V-shape
SP	ENSMUSG00000023249,chr9:106473520-106473679	Parp3,chr9:106473520-106473679	ENSMUSG00000023249	Parp3	V-shape
SP	ENSMUSG00000023952,chr17:46164379-46164723	Gtpbp2,chr17:46164379-46164723	ENSMUSG00000023952	Gtpbp2	V-shape
SP	ENSMUSG00000024045,chr17:32315785-32316185	Akap8,chr17:32315785-32316185	ENSMUSG00000024045	Akap8	V-shape
SP	ENSMUSG00000024193,chr17:26935819-26935917	Phf1,chr17:26935819-26935917	ENSMUSG00000024193	Phf1	V-shape
SP	ENSMUSG00000024287,chr18:9986604-9986689	Thoc1,chr18:9986604-9986689	ENSMUSG00000024287	Thoc1	V-shape
SP	ENSMUSG00000024454,chr18:37941459-37941706	Hdac3,chr18:37941459-37941706	ENSMUSG00000024454	Hdac3	V-shape
SP	ENSMUSG00000024560,chr18:74219239-74219381	Cxxc1,chr18:74219239-74219381	ENSMUSG00000024560	Cxxc1	V-shape
SP	ENSMUSG00000024807,chr19:6050686-6050939	Syvn1,chr19:6050686-6050939	ENSMUSG00000024807	Syvn1	V-shape
SP	ENSMUSG00000024910,chr19:5466146-5466229	Ctsw,chr19:5466146-5466229	ENSMUSG00000024910	Ctsw	V-shape
SP	ENSMUSG00000024948,chr19:6352862-6353118	Map4k2,chr19:6352862-6353118	ENSMUSG00000024948	Map4k2	V-shape
SP	ENSMUSG00000025144,chr11:120711757-120711842	Cenpx,chr11:120711757-120711842	ENSMUSG00000025144	Cenpx	V-shape
SP	ENSMUSG00000025647,chr9:109056094-109056285	Shisa5,chr9:109056094-109056285	ENSMUSG00000025647	Shisa5	V-shape
SP	ENSMUSG00000026269,chr1:92916947-92917145	Rnpepl1,chr1:92916947-92917145	ENSMUSG00000026269	Rnpepl1	V-shape
SP	ENSMUSG00000026803,chr2:29070078-29071296	Ttf1,chr2:29070078-29071296	ENSMUSG00000026803	Ttf1	V-shape
SP	ENSMUSG00000027009,chr2:79288868-79289235	Itga4,chr2:79288868-79289235	ENSMUSG00000027009	Itga4	V-shape
SP	ENSMUSG00000027330,chr2:131192689-131193066	Cdc25b,chr2:131192689-131193066	ENSMUSG00000027330	Cdc25b	V-shape
SP	ENSMUSG00000028059,chr3:88633043-88633256	Arhgef2,chr3:88633043-88633256	ENSMUSG00000028059	Arhgef2	V-shape
SP	ENSMUSG00000028582,chr4:108626377-108626478	Cc2d1b,chr4:108626377-108626478	ENSMUSG00000028582	Cc2d1b	V-shape
SP	ENSMUSG00000028809,chr4:135344670-135346733	Srrm1,chr4:135344670-135346733	ENSMUSG00000028809	Srrm1	V-shape
SP	ENSMUSG00000028923,chr4:141073590-141073673	Necap2,chr4:141073590-141073673	ENSMUSG00000028923	Necap2	V-shape
SP	ENSMUSG00000029385,chr5:93271045-93271199	Ccng2,chr5:93271045-93271199	ENSMUSG00000029385	Ccng2	V-shape
SP	ENSMUSG00000029713,chr5:137529910-137530182	Gnb2,chr5:137529910-137530182	ENSMUSG00000029713	Gnb2	V-shape
SP	ENSMUSG00000029730,chr5:138169474-138169558	Mcm7,chr5:138169474-138169558	ENSMUSG00000029730	Mcm7	V-shape
SP	ENSMUSG00000030180,chr6:120427873-120428216	Kdm5a,chr6:120427873-120428216	ENSMUSG00000030180	Kdm5a	V-shape
SP	ENSMUSG00000030214,chr6:136617068-136617200	Plbd1,chr6:136617068-136617200	ENSMUSG00000030214	Plbd1	V-shape
SP	ENSMUSG00000030330,chr6:125047941-125048174	Ing4,chr6:125047941-125048174	ENSMUSG00000030330	Ing4	V-shape
SP	ENSMUSG00000030530,chr7:80397251-80397896	Furin,chr7:80397251-80397896	ENSMUSG00000030530	Furin	V-shape
SP	ENSMUSG00000031864,chr8:68796821-68797757	Ints10,chr8:68796821-68797757	ENSMUSG00000031864	Ints10	V-shape
SP	ENSMUSG00000032228,chr9:71868279-71870072	Tcf12,chr9:71868279-71870072	ENSMUSG00000032228	Tcf12	V-shape
SP	ENSMUSG00000032359,chr9:90067109-90068403	Ctsh,chr9:90067109-90068403	ENSMUSG00000032359	Ctsh	V-shape
SP	ENSMUSG00000032480,chr9:110084869-110084948	Dhx30,chr9:110084869-110084948	ENSMUSG00000032480	Dhx30	V-shape
SP	ENSMUSG00000032480,chr9:110092437-110092856	Dhx30,chr9:110092437-110092856	ENSMUSG00000032480	Dhx30	V-shape
SP	ENSMUSG00000033685,chr7:100494376-100496724	Ucp2,chr7:100494376-100496724	ENSMUSG00000033685	Ucp2	V-shape
SP	ENSMUSG00000034022,chr15:76596350-76596414	Cpsf1,chr15:76596350-76596414	ENSMUSG00000034022	Cpsf1	V-shape
SP	ENSMUSG00000034101,chr2:84608417-84608958	Ctnnd1,chr2:84608417-84608958	ENSMUSG00000034101	Ctnnd1	V-shape
SP	ENSMUSG00000034438,chr5:105017886-105018560	Gbp8,chr5:105017886-105018560	ENSMUSG00000034438	Gbp8	V-shape
SP	ENSMUSG00000034807,chr8:71621897-71622701	Colgalt1,chr8:71621897-71622701	ENSMUSG00000034807	Colgalt1	V-shape
SP	ENSMUSG00000034893,chr14:75707189-75707920	Cog3,chr14:75707189-75707920	ENSMUSG00000034893	Cog3	V-shape
SP	ENSMUSG00000036606,chr15:89157251-89157390	Plxnb2,chr15:89157251-89157390	ENSMUSG00000036606	Plxnb2	V-shape
SP	ENSMUSG00000036622,chr4:141002547-141002622	Atp13a2,chr4:141002547-141002622	ENSMUSG00000036622	Atp13a2	V-shape
SP	ENSMUSG00000036948,chr5:138260990-138261551	Trappc14,chr5:138260990-138261551	ENSMUSG00000036948	Trappc14	V-shape
SP	ENSMUSG00000037174,chr3:51265007-51266751	Elf2,chr3:51265007-51266751	ENSMUSG00000037174	Elf2	V-shape
SP	ENSMUSG00000037242,chr4:135223571-135226022	Clic4,chr4:135223571-135226022	ENSMUSG00000037242	Clic4	V-shape
SP	ENSMUSG00000038644,chr7:44535193-44535697	Pold1,chr7:44535193-44535697	ENSMUSG00000038644	Pold1	V-shape
SP	ENSMUSG00000038762,chr17:35963237-35963319	Abcf1,chr17:35963237-35963319	ENSMUSG00000038762	Abcf1	V-shape
SP	ENSMUSG00000039176,chr7:79452029-79452105	Polg,chr7:79452029-79452105	ENSMUSG00000039176	Polg	V-shape
SP	ENSMUSG00000040463,chr11:72446062-72446156	Mybbp1a,chr11:72446062-72446156	ENSMUSG00000040463	Mybbp1a	V-shape
SP	ENSMUSG00000040940,chr7:24924884-24924974	Arhgef1,chr7:24924884-24924974	ENSMUSG00000040940	Arhgef1	V-shape
SP	ENSMUSG00000042625,chr17:56563244-56563360	Safb2,chr17:56563244-56563360	ENSMUSG00000042625	Safb2	V-shape
SP	ENSMUSG00000042699,chr1:153464713-153464853	Dhx9,chr1:153464713-153464853	ENSMUSG00000042699	Dhx9	V-shape
SP	ENSMUSG00000047098,chr14:55596859-55598636	Rnf31,chr14:55596859-55598636	ENSMUSG00000047098	Rnf31	V-shape
SP	ENSMUSG00000048865,chr1:171404138-171404219	Arhgap30,chr1:171404138-171404219	ENSMUSG00000048865	Arhgap30	V-shape
SP	ENSMUSG00000049482,chr8:122481006-122481131	Ctu2,chr8:122481006-122481131	ENSMUSG00000049482	Ctu2	V-shape
SP	ENSMUSG00000052142,chr17:32403400-32403519	Rasal3,chr17:32403400-32403519	ENSMUSG00000052142	Rasal3	V-shape
SP	ENSMUSG00000053907,chr6:72434396-72434979	Mat2a,chr6:72434396-72434979	ENSMUSG00000053907	Mat2a	V-shape
SP	ENSMUSG00000054405,chr4:132544123-132544655	Dnajc8,chr4:132544123-132544655	ENSMUSG00000054405	Dnajc8	V-shape
SP	ENSMUSG00000058503,chr5:3558694-3559095	Fam133b,chr5:3558694-3559095	ENSMUSG00000058503	Fam133b	V-shape
SP	ENSMUSG00000058569,chr13:55593358-55593499	Tmed9,chr13:55593358-55593499	ENSMUSG00000058569	Tmed9	V-shape
SP	ENSMUSG00000060992,chr15:103290757-103291327	Copz1,chr15:103290757-103291327	ENSMUSG00000060992	Copz1	V-shape
SP	ENSMUSG00000062753,chr17:27564255-27564383	AI413582,chr17:27564255-27564383	ENSMUSG00000062753	AI413582	V-shape
SP	ENSMUSG00000063108,chr9:20444368-20444892	Zfp26,chr9:20444368-20444892	ENSMUSG00000063108	Zfp26	V-shape
SP	ENSMUSG00000063800,chr4:108568471-108570154	Prpf38a,chr4:108568471-108570154	ENSMUSG00000063800	Prpf38a	V-shape
SP	ENSMUSG00000074129,chr7:45127093-45127207	Rpl13a,chr7:45127093-45127207	ENSMUSG00000074129	Rpl13a	V-shape
SP	ENSMUSG00000084786,chr9:20645260-20645404	Ubl5,chr9:20645260-20645404	ENSMUSG00000084786	Ubl5	V-shape
SP	ENSMUSG00000097195,chr9:88521717-88521916	Snhg5,chr9:88521717-88521916	ENSMUSG00000097195	Snhg5	V-shape
SP	ENSMUSG00000098950,chr2:156078234-156078330	Gm28036,chr2:156078234-156078330	ENSMUSG00000098950	Gm28036	V-shape
LN	ENSMUSG00000000787,chrX:13287384-13287462	Ddx3x,chrX:13287384-13287462	ENSMUSG00000000787	Ddx3x	reverse V-shape
LN	ENSMUSG00000001588,chr11:69884866-69885391	Acap1,chr11:69884866-69885391	ENSMUSG00000001588	Acap1	reverse V-shape
LN	ENSMUSG00000002108,chr2:91190285-91190460	Nr1h3,chr2:91190285-91190460	ENSMUSG00000002108	Nr1h3	reverse V-shape
LN	ENSMUSG00000002108,chr2:91190642-91190737	Nr1h3,chr2:91190642-91190737	ENSMUSG00000002108	Nr1h3	reverse V-shape
LN	ENSMUSG00000004789,chr12:85118415-85118525	Dlst,chr12:85118415-85118525	ENSMUSG00000004789	Dlst	reverse V-shape
LN	ENSMUSG00000004865,chr17:28599870-28600241	Srpk1,chr17:28599870-28600241	ENSMUSG00000004865	Srpk1	reverse V-shape
LN	ENSMUSG00000006498,chr10:79859523-79859600	Ptbp1,chr10:79859523-79859600	ENSMUSG00000006498	Ptbp1	reverse V-shape
LN	ENSMUSG00000020156,chr10:80236182-80238313	Pwwp3a,chr10:80236182-80238313	ENSMUSG00000020156	Pwwp3a	reverse V-shape
LN	ENSMUSG00000021428,chr13:38043979-38045271	Riok1,chr13:38043979-38045271	ENSMUSG00000021428	Riok1	reverse V-shape
LN	ENSMUSG00000021494,chr13:55535805-55535884	Ddx41,chr13:55535805-55535884	ENSMUSG00000021494	Ddx41	reverse V-shape
LN	ENSMUSG00000021832,chr14:45330910-45330985	Psmc6,chr14:45330910-45330985	ENSMUSG00000021832	Psmc6	reverse V-shape
LN	ENSMUSG00000021901,chr14:31256792-31257287	Bap1,chr14:31256792-31257287	ENSMUSG00000021901	Bap1	reverse V-shape
LN	ENSMUSG00000021948,chr14:30605570-30605814	Prkcd,chr14:30605570-30605814	ENSMUSG00000021948	Prkcd	reverse V-shape
LN	ENSMUSG00000021948,chr14:30607451-30607606	Prkcd,chr14:30607451-30607606	ENSMUSG00000021948	Prkcd	reverse V-shape
LN	ENSMUSG00000022999,chr15:98908760-98908847	Lmbr1l,chr15:98908760-98908847	ENSMUSG00000022999	Lmbr1l	reverse V-shape
LN	ENSMUSG00000024914,chr19:5423420-5423558	Drap1,chr19:5423420-5423558	ENSMUSG00000024914	Drap1	reverse V-shape
LN	ENSMUSG00000024948,chr19:6343884-6343970	Map4k2,chr19:6343884-6343970	ENSMUSG00000024948	Map4k2	reverse V-shape
LN	ENSMUSG00000025737,chr17:25827357-25827426	Wdr24,chr17:25827357-25827426	ENSMUSG00000025737	Wdr24	reverse V-shape
LN	ENSMUSG00000025982,chr1:55014563-55016374	Sf3b1,chr1:55014563-55016374	ENSMUSG00000025982	Sf3b1	reverse V-shape
LN	ENSMUSG00000027247,chr2:91669462-91669650	Arhgap1,chr2:91669462-91669650	ENSMUSG00000027247	Arhgap1	reverse V-shape
LN	ENSMUSG00000027433,chr2:147029785-147029867	Xrn2,chr2:147029785-147029867	ENSMUSG00000027433	Xrn2	reverse V-shape
LN	ENSMUSG00000028064,chr3:88451451-88451686	Sema4a,chr3:88451451-88451686	ENSMUSG00000028064	Sema4a	reverse V-shape
LN	ENSMUSG00000028954,chr5:24694762-24695518	Nub1,chr5:24694762-24695518	ENSMUSG00000028954	Nub1	reverse V-shape
LN	ENSMUSG00000029472,chr5:122791756-122791825	Anapc5,chr5:122791756-122791825	ENSMUSG00000029472	Anapc5	reverse V-shape
LN	ENSMUSG00000029599,chr5:120624730-120625700	Ddx54,chr5:120624730-120625700	ENSMUSG00000029599	Ddx54	reverse V-shape
LN	ENSMUSG00000029617,chr5:143998275-143998542	Ccz1,chr5:143998275-143998542	ENSMUSG00000029617	Ccz1	reverse V-shape
LN	ENSMUSG00000029713,chr5:137529910-137530182	Gnb2,chr5:137529910-137530182	ENSMUSG00000029713	Gnb2	reverse V-shape
LN	ENSMUSG00000030120,chr6:124932177-124932409	Mlf2,chr6:124932177-124932409	ENSMUSG00000030120	Mlf2	reverse V-shape
LN	ENSMUSG00000030824,chr7:45495315-45495553	Nucb1,chr7:45495315-45495553	ENSMUSG00000030824	Nucb1	reverse V-shape
LN	ENSMUSG00000031389,chrX:73900184-73900276	Arhgap4,chrX:73900184-73900276	ENSMUSG00000031389	Arhgap4	reverse V-shape
LN	ENSMUSG00000031805,chr8:71679845-71680433	Jak3,chr8:71679845-71680433	ENSMUSG00000031805	Jak3	reverse V-shape
LN	ENSMUSG00000032115,chr9:44387093-44387248	Hyou1,chr9:44387093-44387248	ENSMUSG00000032115	Hyou1	reverse V-shape
LN	ENSMUSG00000032480,chr9:110092437-110092856	Dhx30,chr9:110092437-110092856	ENSMUSG00000032480	Dhx30	reverse V-shape
LN	ENSMUSG00000033166,chr14:99087851-99088760	Dis3,chr14:99087851-99088760	ENSMUSG00000033166	Dis3	reverse V-shape
LN	ENSMUSG00000034432,chr1:90604446-90605462	Cops8,chr1:90604446-90605462	ENSMUSG00000034432	Cops8	reverse V-shape
LN	ENSMUSG00000034928,chr13:54684087-54684336	Rnf44,chr13:54684087-54684336	ENSMUSG00000034928	Rnf44	reverse V-shape
LN	ENSMUSG00000035086,chr11:101289926-101290437	Becn1,chr11:101289926-101290437	ENSMUSG00000035086	Becn1	reverse V-shape
LN	ENSMUSG00000035278,chr10:80796655-80796730	Plekhj1,chr10:80796655-80796730	ENSMUSG00000035278	Plekhj1	reverse V-shape
LN	ENSMUSG00000035941,chr9:85715417-85717549	Ibtk,chr9:85715417-85717549	ENSMUSG00000035941	Ibtk	reverse V-shape
LN	ENSMUSG00000035953,chr14:50929059-50929200	Pip4p1,chr14:50929059-50929200	ENSMUSG00000035953	Pip4p1	reverse V-shape
LN	ENSMUSG00000036438,chr17:87435711-87435789	Calm2,chr17:87435711-87435789	ENSMUSG00000036438	Calm2	reverse V-shape
LN	ENSMUSG00000036948,chr5:138260990-138261551	Trappc14,chr5:138260990-138261551	ENSMUSG00000036948	Trappc14	reverse V-shape
LN	ENSMUSG00000037266,chr4:134925433-134926733	Rsrp1,chr4:134925433-134926733	ENSMUSG00000037266	Rsrp1	reverse V-shape
LN	ENSMUSG00000038773,chr18:34794564-34795673	Kdm3b,chr18:34794564-34795673	ENSMUSG00000038773	Kdm3b	reverse V-shape
LN	ENSMUSG00000038828,chr5:30872769-30873041	Tmem214,chr5:30872769-30873041	ENSMUSG00000038828	Tmem214	reverse V-shape
LN	ENSMUSG00000040940,chr7:24912156-24912308	Arhgef1,chr7:24912156-24912308	ENSMUSG00000040940	Arhgef1	reverse V-shape
LN	ENSMUSG00000042524,chr15:79728582-79729031	Sun2,chr15:79728582-79729031	ENSMUSG00000042524	Sun2	reverse V-shape
LN	ENSMUSG00000044573,chr12:30904984-30905067	Acp1,chr12:30904984-30905067	ENSMUSG00000044573	Acp1	reverse V-shape
LN	ENSMUSG00000053332,chr1:161037548-161037993	Gas5,chr1:161037548-161037993	ENSMUSG00000053332	Gas5	reverse V-shape
LN	ENSMUSG00000053841,chr4:129631355-129631589	Txlna,chr4:129631355-129631589	ENSMUSG00000053841	Txlna	reverse V-shape
LN	ENSMUSG00000054874,chr19:5686667-5687117	Pcnx3,chr19:5686667-5687117	ENSMUSG00000054874	Pcnx3	reverse V-shape
LN	ENSMUSG00000060073,chr12:70984595-70984670	Psma3,chr12:70984595-70984670	ENSMUSG00000060073	Psma3	reverse V-shape
LN	ENSMUSG00000060216,chr11:70438029-70438317	Arrb2,chr11:70438029-70438317	ENSMUSG00000060216	Arrb2	reverse V-shape
LN	ENSMUSG00000062006,chr3:130729151-130729227	Rpl34,chr3:130729151-130729227	ENSMUSG00000062006	Rpl34	reverse V-shape
LN	ENSMUSG00000066621,chr5:144217026-144217224	Tecpr1,chr5:144217026-144217224	ENSMUSG00000066621	Tecpr1	reverse V-shape
LN	ENSMUSG00000070034,chr1:85579200-85579642	Sp110,chr1:85579200-85579642	ENSMUSG00000070034	Sp110	reverse V-shape
LN	ENSMUSG00000074129,chr7:45127093-45127207	Rpl13a,chr7:45127093-45127207	ENSMUSG00000074129	Rpl13a	reverse V-shape
LN	ENSMUSG00000079197,chr14:55587741-55588038	Psme2,chr14:55587741-55588038	ENSMUSG00000079197	Psme2	reverse V-shape
LN	ENSMUSG00000098950,chr2:156078234-156078330	Gm28036,chr2:156078234-156078330	ENSMUSG00000098950	Gm28036	reverse V-shape
LN	ENSMUSG00000000134,chrX:7771071-7772447	Tfe3,chrX:7771071-7772447	ENSMUSG00000000134	Tfe3	V-shape
LN	ENSMUSG00000001248,chr7:31134518-31135595	Gramd1a,chr7:31134518-31135595	ENSMUSG00000001248	Gramd1a	V-shape
LN	ENSMUSG00000001416,chr3:88299404-88300798	Cct3,chr3:88299404-88300798	ENSMUSG00000001416	Cct3	V-shape
LN	ENSMUSG00000002007,chrX:73778175-73778252	Srpk3,chrX:73778175-73778252	ENSMUSG00000002007	Srpk3	V-shape
LN	ENSMUSG00000002010,chrX:73782104-73782673	Idh3g,chrX:73782104-73782673	ENSMUSG00000002010	Idh3g	V-shape
LN	ENSMUSG00000002395,chr8:71367694-71367768	Use1,chr8:71367694-71367768	ENSMUSG00000002395	Use1	V-shape
LN	ENSMUSG00000003039,chr8:72220083-72221926	Fam32a,chr8:72220083-72221926	ENSMUSG00000003039	Fam32a	V-shape
LN	ENSMUSG00000004100,chr9:20889440-20889632	Ppan,chr9:20889440-20889632	ENSMUSG00000004100	Ppan	V-shape
LN	ENSMUSG00000004266,chr6:124720909-124721078	Ptpn6,chr6:124720909-124721078	ENSMUSG00000004266	Ptpn6	V-shape
LN	ENSMUSG00000005625,chr3:95032985-95033480	Psmd4,chr3:95032985-95033480	ENSMUSG00000005625	Psmd4	V-shape
LN	ENSMUSG00000009995,chrX:74283117-74283270	Tafazzin,chrX:74283117-74283270	ENSMUSG00000009995	Tafazzin	V-shape
LN	ENSMUSG00000010057,chr9:107545032-107545243	Nprl2,chr9:107545032-107545243	ENSMUSG00000010057	Nprl2	V-shape
LN	ENSMUSG00000010936,chr8:110710493-110711591	Vac14,chr8:110710493-110711591	ENSMUSG00000010936	Vac14	V-shape
LN	ENSMUSG00000014353,chr2:128845535-128846727	Tmem87b,chr2:128845535-128846727	ENSMUSG00000014353	Tmem87b	V-shape
LN	ENSMUSG00000015656,chr9:40802624-40802737	Hspa8,chr9:40802624-40802737	ENSMUSG00000015656	Hspa8	V-shape
LN	ENSMUSG00000016344,chr2:181187737-181187807	Ppdpf,chr2:181187737-181187807	ENSMUSG00000016344	Ppdpf	V-shape
LN	ENSMUSG00000016933,chr2:160761195-160761303	Plcg1,chr2:160761195-160761303	ENSMUSG00000016933	Plcg1	V-shape
LN	ENSMUSG00000018076,chr5:118749829-118750844	Med13l,chr5:118749829-118750844	ENSMUSG00000018076	Med13l	V-shape
LN	ENSMUSG00000018287,chr11:70664477-70664576	Spag7,chr11:70664477-70664576	ENSMUSG00000018287	Spag7	V-shape
LN	ENSMUSG00000019082,chr7:141432140-141432661	Slc25a22,chr7:141432140-141432661	ENSMUSG00000019082	Slc25a22	V-shape
LN	ENSMUSG00000019338,chr3:95008918-95009074	Zfp687,chr3:95008918-95009074	ENSMUSG00000019338	Zfp687	V-shape
LN	ENSMUSG00000020116,chr11:17209138-17209309	Pno1,chr11:17209138-17209309	ENSMUSG00000020116	Pno1	V-shape
LN	ENSMUSG00000020329,chr10:79736444-79736521	Polrmt,chr10:79736444-79736521	ENSMUSG00000020329	Polrmt	V-shape
LN	ENSMUSG00000020359,chr11:51592094-51592167	Phykpl,chr11:51592094-51592167	ENSMUSG00000020359	Phykpl	V-shape
LN	ENSMUSG00000020362,chr11:49685156-49685261	Cnot6,chr11:49685156-49685261	ENSMUSG00000020362	Cnot6	V-shape
LN	ENSMUSG00000020640,chr12:4712037-4712465	Itsn2,chr12:4712037-4712465	ENSMUSG00000020640	Itsn2	V-shape
LN	ENSMUSG00000020708,chr11:106262503-106262579	Psmc5,chr11:106262503-106262579	ENSMUSG00000020708	Psmc5	V-shape
LN	ENSMUSG00000020745,chr11:74684509-74685894	Pafah1b1,chr11:74684509-74685894	ENSMUSG00000020745	Pafah1b1	V-shape
LN	ENSMUSG00000020817,chr11:70934595-70935125	Rabep1,chr11:70934595-70935125	ENSMUSG00000020817	Rabep1	V-shape
LN	ENSMUSG00000022214,chr14:55565167-55565482	Dcaf11,chr14:55565167-55565482	ENSMUSG00000022214	Dcaf11	V-shape
LN	ENSMUSG00000022241,chr15:11391893-11391968	Tars,chr15:11391893-11391968	ENSMUSG00000022241	Tars	V-shape
LN	ENSMUSG00000022407,chr15:80963730-80963878	Adsl,chr15:80963730-80963878	ENSMUSG00000022407	Adsl	V-shape
LN	ENSMUSG00000022488,chr15:103475735-103475976	Nckap1l,chr15:103475735-103475976	ENSMUSG00000022488	Nckap1l	V-shape
LN	ENSMUSG00000022556,chr15:76497830-76497950	Hsf1,chr15:76497830-76497950	ENSMUSG00000022556	Hsf1	V-shape
LN	ENSMUSG00000022587,chr15:74958389-74958491	Ly6e,chr15:74958389-74958491	ENSMUSG00000022587	Ly6e	V-shape
LN	ENSMUSG00000022999,chr15:98908597-98908674	Lmbr1l,chr15:98908597-98908674	ENSMUSG00000022999	Lmbr1l	V-shape
LN	ENSMUSG00000024045,chr17:32316668-32317065	Akap8,chr17:32316668-32317065	ENSMUSG00000024045	Akap8	V-shape
LN	ENSMUSG00000024319,chr17:33962186-33962421	Vps52,chr17:33962186-33962421	ENSMUSG00000024319	Vps52	V-shape
LN	ENSMUSG00000024335,chr17:34114178-34114348	Brd2,chr17:34114178-34114348	ENSMUSG00000024335	Brd2	V-shape
LN	ENSMUSG00000024446,chr17:36257525-36257604	Rpp21,chr17:36257525-36257604	ENSMUSG00000024446	Rpp21	V-shape
LN	ENSMUSG00000024454,chr18:37941459-37941706	Hdac3,chr18:37941459-37941706	ENSMUSG00000024454	Hdac3	V-shape
LN	ENSMUSG00000024542,chr18:67878076-67878537	Cep192,chr18:67878076-67878537	ENSMUSG00000024542	Cep192	V-shape
LN	ENSMUSG00000024695,chr19:12776074-12776410	Zfp91,chr19:12776074-12776410	ENSMUSG00000024695	Zfp91	V-shape
LN	ENSMUSG00000024911,chr19:5463851-5464127	Fibp,chr19:5463851-5464127	ENSMUSG00000024911	Fibp	V-shape
LN	ENSMUSG00000024914,chr19:5424276-5424359	Drap1,chr19:5424276-5424359	ENSMUSG00000024914	Drap1	V-shape
LN	ENSMUSG00000024926,chr19:5603553-5603632	Kat5,chr19:5603553-5603632	ENSMUSG00000024926	Kat5	V-shape
LN	ENSMUSG00000025473,chr7:139984844-139985335	Adam8,chr7:139984844-139985335	ENSMUSG00000025473	Adam8	V-shape
LN	ENSMUSG00000025473,chr7:139986469-139986731	Adam8,chr7:139986469-139986731	ENSMUSG00000025473	Adam8	V-shape
LN	ENSMUSG00000025722,chr7:80900712-80901183	Wdr73,chr7:80900712-80901183	ENSMUSG00000025722	Wdr73	V-shape
LN	ENSMUSG00000025733,chr17:25841668-25841755	Rhot2,chr17:25841668-25841755	ENSMUSG00000025733	Rhot2	V-shape
LN	ENSMUSG00000025915,chr1:9885754-9886045	Sgk3,chr1:9885754-9886045	ENSMUSG00000025915	Sgk3	V-shape
LN	ENSMUSG00000026116,chr1:36808477-36808825	Tmem131,chr1:36808477-36808825	ENSMUSG00000026116	Tmem131	V-shape
LN	ENSMUSG00000027263,chr2:121189470-121189822	Tubgcp4,chr2:121189470-121189822	ENSMUSG00000027263	Tubgcp4	V-shape
LN	ENSMUSG00000027330,chr2:131192689-131193066	Cdc25b,chr2:131192689-131193066	ENSMUSG00000027330	Cdc25b	V-shape
LN	ENSMUSG00000027349,chr2:117257780-117259219	Fam98b,chr2:117257780-117259219	ENSMUSG00000027349	Fam98b	V-shape
LN	ENSMUSG00000027404,chr2:130172729-130173034	Snrpb,chr2:130172729-130173034	ENSMUSG00000027404	Snrpb	V-shape
LN	ENSMUSG00000028057,chr3:88717471-88717600	Rit1,chr3:88717471-88717600	ENSMUSG00000028057	Rit1	V-shape
LN	ENSMUSG00000028461,chr4:43495622-43495695	Ccdc107,chr4:43495622-43495695	ENSMUSG00000028461	Ccdc107	V-shape
LN	ENSMUSG00000028670,chr4:135969530-135969599	Lypla2,chr4:135969530-135969599	ENSMUSG00000028670	Lypla2	V-shape
LN	ENSMUSG00000028821,chr4:134935050-134935372	Syf2,chr4:134935050-134935372	ENSMUSG00000028821	Syf2	V-shape
LN	ENSMUSG00000029017,chr5:21743459-21745976	Pmpcb,chr5:21743459-21745976	ENSMUSG00000029017	Pmpcb	V-shape
LN	ENSMUSG00000029068,chr4:155817988-155820327	Ccnl2,chr4:155817988-155820327	ENSMUSG00000029068	Ccnl2	V-shape
LN	ENSMUSG00000029148,chr5:31244289-31244456	Nrbp1,chr5:31244289-31244456	ENSMUSG00000029148	Nrbp1	V-shape
LN	ENSMUSG00000029177,chr5:30673060-30673291	Cenpa,chr5:30673060-30673291	ENSMUSG00000029177	Cenpa	V-shape
LN	ENSMUSG00000029670,chr6:21969436-21969912	Ing3,chr6:21969436-21969912	ENSMUSG00000029670	Ing3	V-shape
LN	ENSMUSG00000030037,chr6:83109427-83109520	Mrpl53,chr6:83109427-83109520	ENSMUSG00000030037	Mrpl53	V-shape
LN	ENSMUSG00000031862,chr8:69798514-69798582	Atp13a1,chr8:69798514-69798582	ENSMUSG00000031862	Atp13a1	V-shape
LN	ENSMUSG00000032115,chr9:44388366-44388480	Hyou1,chr9:44388366-44388480	ENSMUSG00000032115	Hyou1	V-shape
LN	ENSMUSG00000032308,chr9:57593854-57593980	Ulk3,chr9:57593854-57593980	ENSMUSG00000032308	Ulk3	V-shape
LN	ENSMUSG00000032596,chr9:107981297-107981388	Uba7,chr9:107981297-107981388	ENSMUSG00000032596	Uba7	V-shape
LN	ENSMUSG00000033685,chr7:100494376-100496724	Ucp2,chr7:100494376-100496724	ENSMUSG00000033685	Ucp2	V-shape
LN	ENSMUSG00000034616,chr19:4264461-4265101	Ssh3,chr19:4264461-4265101	ENSMUSG00000034616	Ssh3	V-shape
LN	ENSMUSG00000034807,chr8:71621897-71622701	Colgalt1,chr8:71621897-71622701	ENSMUSG00000034807	Colgalt1	V-shape
LN	ENSMUSG00000035798,chr10:110949684-110950559	Zdhhc17,chr10:110949684-110950559	ENSMUSG00000035798	Zdhhc17	V-shape
LN	ENSMUSG00000036281,chr2:26372826-26372972	Snapc4,chr2:26372826-26372972	ENSMUSG00000036281	Snapc4	V-shape
LN	ENSMUSG00000038241,chr2:155988433-155989497	Cep250,chr2:155988433-155989497	ENSMUSG00000038241	Cep250	V-shape
LN	ENSMUSG00000038346,chr6:125024553-125024744	Zfp384,chr6:125024553-125024744	ENSMUSG00000038346	Zfp384	V-shape
LN	ENSMUSG00000038828,chr5:30874969-30875788	Tmem214,chr5:30874969-30875788	ENSMUSG00000038828	Tmem214	V-shape
LN	ENSMUSG00000039318,chr1:185267075-185267171	Rab3gap2,chr1:185267075-185267171	ENSMUSG00000039318	Rab3gap2	V-shape
LN	ENSMUSG00000039637,chr16:4634431-4634587	Coro7,chr16:4634431-4634587	ENSMUSG00000039637	Coro7	V-shape
LN	ENSMUSG00000040044,chr4:34597442-34598606	Orc3,chr4:34597442-34598606	ENSMUSG00000040044	Orc3	V-shape
LN	ENSMUSG00000040048,chr17:24722221-24722379	Ndufb10,chr17:24722221-24722379	ENSMUSG00000040048	Ndufb10	V-shape
LN	ENSMUSG00000040472,chr14:55719346-55719428	Rabggta,chr14:55719346-55719428	ENSMUSG00000040472	Rabggta	V-shape
LN	ENSMUSG00000040701,chr14:55104659-55104829	Ap1g2,chr14:55104659-55104829	ENSMUSG00000040701	Ap1g2	V-shape
LN	ENSMUSG00000045679,chr12:16997704-16997772	Pqlc3,chr12:16997704-16997772	ENSMUSG00000045679	Pqlc3	V-shape
LN	ENSMUSG00000053332,chr1:161036853-161037122	Gas5,chr1:161036853-161037122	ENSMUSG00000053332	Gas5	V-shape
LN	ENSMUSG00000055681,chr8:70312781-70312857	Cope,chr8:70312781-70312857	ENSMUSG00000055681	Cope	V-shape
LN	ENSMUSG00000057649,chr13:73942055-73942689	Brd9,chr13:73942055-73942689	ENSMUSG00000057649	Brd9	V-shape
LN	ENSMUSG00000059208,chr17:33666530-33666645	Hnrnpm,chr17:33666530-33666645	ENSMUSG00000059208	Hnrnpm	V-shape
LN	ENSMUSG00000059796,chr11:69667775-69668020	Eif4a1,chr11:69667775-69668020	ENSMUSG00000059796	Eif4a1	V-shape
LN	ENSMUSG00000060601,chr7:44552237-44552505	Nr1h2,chr7:44552237-44552505	ENSMUSG00000060601	Nr1h2	V-shape
LN	ENSMUSG00000062729,chr1:171278196-171279121	Ppox,chr1:171278196-171279121	ENSMUSG00000062729	Ppox	V-shape
LN	ENSMUSG00000064127,chrX:12706446-12706530	Med14,chrX:12706446-12706530	ENSMUSG00000064127	Med14	V-shape
LN	ENSMUSG00000066979,chr7:131561607-131563332	Bub3,chr7:131561607-131563332	ENSMUSG00000066979	Bub3	V-shape
LN	ENSMUSG00000070003,chr8:70598618-70598700	Ssbp4,chr8:70598618-70598700	ENSMUSG00000070003	Ssbp4	V-shape
LN	ENSMUSG00000072501,chr15:66629982-66630865	Phf20l1,chr15:66629982-66630865	ENSMUSG00000072501	Phf20l1	V-shape

[truncated: 5 more sheets: S10, S11, S12, S13, S14]
